# Supplementary material
Source: publisher figshare collection journal article supplement (https://gsapubs.figshare.com/articles/dataset/_/13486902)
Supplement: Supplementary file 1 [file 1]

## Sheet: Pollen Data
	Dataset S3. Raw fossil pollen data
	Class	Class Code	Order	Order Code	Family	Family Code	Genus/Species	Genus Code	Species Code	Clade	Clade Code	Stage	Stage Val	Study	Study Val	Abundance	Formation	Formation Val	Paleolat (76 Ma)	Paleolon (76 Ma)	Paleolat (73.5 Ma)	Paleolon (73.5 Ma)	Paleolat (70.5 Ma)	Paleolon (70.5 Ma)	Lat	Lon	Quantitative Age	Error	Rd Age	Environment	Environmental Code	EV	Notes
	Liliopsida	10	Arecales	6	uncertain	105	Arecipites microreticulatus	25	153	Angiosperm	1	Camp	1	Anderson, 1960	1	NULL	Vermejo	42	44.5216	-79.8276	44.5994	-81.6748	43.6499	-84.0662	35.9945	-106.965	74.3	0.9	75	swampy, lagoonal	3	3. swampy, lagoonal	NULL
	Liliopsida	10	Arecales	6	uncertain	105	Arecipites reticulatus	25	154	Angiosperm	1	Camp	1	Anderson, 1960	1	NULL	Vermejo	42	44.5216	-79.8276	44.5994	-81.6748	43.6499	-84.0662	35.9945	-106.965	74.3	0.9	75	swampy, lagoonal	3	3. swampy, lagoonal	NULL
	uncertain	23	uncertain	80	uncertain	105	Confertisulcites knowltoni	73	316	Angiosperm	1	Camp	1	Anderson, 1960	1	NULL	Vermejo	42	44.5216	-79.8276	44.5994	-81.6748	43.6499	-84.0662	35.9945	-106.965	74.3	0.9	75	unknown	0	0. unknown	NULL
	Magnoliopsida	13	Sapindales	67	Sapindaceae	91	Cupanieidites cf. C. reticularis	79	332	Angiosperm	1	Camp	1	Anderson, 1960	1	NULL	Vermejo	42	44.5216	-79.8276	44.5994	-81.6748	43.6499	-84.0662	35.9945	-106.965	74.3	0.9	75	wet, successional	5	5. wet, successional	NULL
	Magnoliopsida	13	Fagales?	29	Juglandaceae	55	Extratriporopollenites sp.	114	439	Angiosperm	1	Camp	1	Anderson, 1960	1	NULL	Vermejo	42	44.5216	-79.8276	44.5994	-81.6748	43.6499	-84.0662	35.9945	-106.965	74.3	0.9	75	swampy, lagoonal	3	3. swampy, lagoonal	NULL
	Lycopodiopsida	12	Lycopodiales?	37	Lycopodiaceae?	62	Foveotriletes scobicularis	121	460	Fern/Moss	2	Camp	1	Anderson, 1960	1	NULL	Vermejo	42	44.5216	-79.8276	44.5994	-81.6748	43.6499	-84.0662	35.9945	-106.965	74.3	0.9	75	estuarine, aquatic	7	7. estuarine, aquatic	NULL
	Magnoliopsida	13	Fagales	28	uncertain	105	Kurtzipites trispissatus	156	554	Angiosperm	1	Camp	1	Anderson, 1960	1	NULL	Vermejo	42	44.5216	-79.8276	44.5994	-81.6748	43.6499	-84.0662	35.9945	-106.965	74.3	0.9	75	temperate lowland forest	2	2. temperate lowland forest	NULL
	Liliopsida	10	Liliales	34	uncertain	105	Liliacidites hyalaciniatus	168	593	Angiosperm	1	Camp	1	Anderson, 1960	1	NULL	Vermejo	42	44.5216	-79.8276	44.5994	-81.6748	43.6499	-84.0662	35.9945	-106.965	74.3	0.9	75	temperate lowland forest	2	2. temperate lowland forest	NULL
	Liliopsida	10	Liliales	34	uncertain	105	Liliacidites leei	168	595	Angiosperm	1	Camp	1	Anderson, 1960	1	NULL	Vermejo	42	44.5216	-79.8276	44.5994	-81.6748	43.6499	-84.0662	35.9945	-106.965	74.3	0.9	75	temperate lowland forest	2	2. temperate lowland forest	NULL
	Liliopsida	10	Liliales	34	uncertain	105	Liliacidites sp.	168	598	Angiosperm	1	Camp	1	Anderson, 1960	1	NULL	Vermejo	42	44.5216	-79.8276	44.5994	-81.6748	43.6499	-84.0662	35.9945	-106.965	74.3	0.9	75	temperate lowland forest	2	2. temperate lowland forest	NULL
	Lycopodiopsida	12	Lycopodiales	36	Lycopodiaceae	61	Lycopodium novomexicanum	174	614	Fern/Moss	2	Camp	1	Anderson, 1960	1	NULL	Vermejo	42	44.5216	-79.8276	44.5994	-81.6748	43.6499	-84.0662	35.9945	-106.965	74.3	0.9	75	upland forest	1	1. upland forest	NULL
	uncertain	23	uncertain	80	uncertain	105	Monosulcites perspinosus	194	684	Angiosperm	1	Camp	1	Anderson, 1960	1	NULL	Vermejo	42	44.5216	-79.8276	44.5994	-81.6748	43.6499	-84.0662	35.9945	-106.965	74.3	0.9	75	coastal plain	4	4. coastal plain	NULL
	uncertain	23	uncertain	80	uncertain	105	Monosulcites sp.	194	687	Angiosperm	1	Camp	1	Anderson, 1960	1	NULL	Vermejo	42	44.5216	-79.8276	44.5994	-81.6748	43.6499	-84.0662	35.9945	-106.965	74.3	0.9	75	coastal plain	4	4. coastal plain	NULL
	uncertain	23	uncertain	80	uncertain	105	Navisulcites marginatus	203	700	Angiosperm	1	Camp	1	Anderson, 1960	1	NULL	Vermejo	42	44.5216	-79.8276	44.5994	-81.6748	43.6499	-84.0662	35.9945	-106.965	74.3	0.9	75	coastal plain	4	4. coastal plain	NULL
	Magnoliopsida	13	Rosales	63	Rhamnaceae	85	Paliurus triplicatus	219	729	Angiosperm	1	Camp	1	Anderson, 1960	1	NULL	Vermejo	42	44.5216	-79.8276	44.5994	-81.6748	43.6499	-84.0662	35.9945	-106.965	74.3	0.9	75	coastal plain	4	4. coastal plain	NULL
	Magnoliopsida	13	Magnoliales?	39	uncertain	105	Periporopollenites sp.	229	745	Angiosperm	1	Camp	1	Anderson, 1960	1	NULL	Vermejo	42	44.5216	-79.8276	44.5994	-81.6748	43.6499	-84.0662	35.9945	-106.965	74.3	0.9	75	temperate lowland forest	2	2. temperate lowland forest	NULL
	uncertain	23	uncertain	80	uncertain	105	Petrotrilites cubensis	232	749	Fern/Moss	2	Camp	1	Anderson, 1960	1	NULL	Vermejo	42	44.5216	-79.8276	44.5994	-81.6748	43.6499	-84.0662	35.9945	-106.965	74.3	0.9	75	unknown	0	0. unknown	NULL
	Pinopsida	16	Pinales	54	Cupressaceae?	30	Pollenites sp.	251	803	Gymnosperm	3	Camp	1	Anderson, 1960	1	NULL	Vermejo	42	44.5216	-79.8276	44.5994	-81.6748	43.6499	-84.0662	35.9945	-106.965	74.3	0.9	75	unknown	0	0. unknown	NULL
	Magnoliopsida	13	Proteales	61	uncertain	105	Proteacidites retusus	262	831	Angiosperm	1	Camp	1	Anderson, 1960	1	NULL	Vermejo	42	44.5216	-79.8276	44.5994	-81.6748	43.6499	-84.0662	35.9945	-106.965	74.3	0.9	75	unknown	0	0. unknown	NULL
	Magnoliopsida	13	Proteales	61	uncertain	105	Proteacidites sp.	262	832	Angiosperm	1	Camp	1	Anderson, 1960	1	NULL	Vermejo	42	44.5216	-79.8276	44.5994	-81.6748	43.6499	-84.0662	35.9945	-106.965	74.3	0.9	75	unknown	0	0. unknown	NULL
	Magnoliopsida	13	Proteales	61	uncertain	105	Proteacidites thalmanii	262	835	Angiosperm	1	Camp	1	Anderson, 1960	1	NULL	Vermejo	42	44.5216	-79.8276	44.5994	-81.6748	43.6499	-84.0662	35.9945	-106.965	74.3	0.9	75	unknown	0	0. unknown	NULL
	Sphagnopsida	22	Sphagnales	76	Sphagnaceae	99	Sphagnum sp.	321	965	Fern/Moss	2	Camp	1	Anderson, 1960	1	NULL	Vermejo	42	44.5216	-79.8276	44.5994	-81.6748	43.6499	-84.0662	35.9945	-106.965	74.3	0.9	75	swampy, lagoonal	3	3. swampy, lagoonal	NULL
	uncertain	23	uncertain	80	uncertain	105	Sporites sp.	323	972	Fern/Moss	2	Camp	1	Anderson, 1960	1	NULL	Vermejo	42	44.5216	-79.8276	44.5994	-81.6748	43.6499	-84.0662	35.9945	-106.965	74.3	0.9	75	unknown	0	0. unknown	NULL
	Magnoliopsida	13	Malvales	42	Malvaceae	65	Tilia wodehousei	350	1027	Angiosperm	1	Camp	1	Anderson, 1960	1	NULL	Vermejo	42	44.5216	-79.8276	44.5994	-81.6748	43.6499	-84.0662	35.9945	-106.965	74.3	0.9	75	temperate lowland forest	2	2. temperate lowland forest	NULL
	Magnoliopsida	13	Magnoliales?	39	uncertain	105	Tricolpites sp.	358	1078	Angiosperm	1	Camp	1	Anderson, 1960	1	NULL	Vermejo	42	44.5216	-79.8276	44.5994	-81.6748	43.6499	-84.0662	35.9945	-106.965	74.3	0.9	75	coastal plain	4	4. coastal plain	NULL
	Magnoliopsida	13	Magnoliales?	39	uncertain	105	Tricolporites traversei	361	1103	Angiosperm	1	Camp	1	Anderson, 1960	1	NULL	Vermejo	42	44.5216	-79.8276	44.5994	-81.6748	43.6499	-84.0662	35.9945	-106.965	74.3	0.9	75	temperate lowland forest	2	2. temperate lowland forest	NULL
	uncertain	23	uncertain	80	uncertain	105	Triletes sp.	364	1116	Fern/Moss	2	Camp	1	Anderson, 1960	1	NULL	Vermejo	42	44.5216	-79.8276	44.5994	-81.6748	43.6499	-84.0662	35.9945	-106.965	74.3	0.9	75	temperate lowland forest	2	2. temperate lowland forest	NULL
	Pinopsida	16	Pinales?	55	Pinaceae?	77	Abietineaepollenites sp.	2	4	Gymnosperm	3	Camp	1	Bihl, 1973	4	NULL	East Fork	17	75.0523	-79.8089	75.1359	-83.0625	74.1825	-86.7532	64.486	-125.709	73.1	3.2	75	upland forest	1	1. upland forest	NULL
	Magnoliopsida	13	Santalales?	66	Santalaceae?	90	Aquilapollenites argutus	22	66	Angiosperm	1	Camp	1	Bihl, 1973	4	NULL	East Fork	17	75.0523	-79.8089	75.1359	-83.0625	74.1825	-86.7532	64.486	-125.709	73.1	3.2	75	temperate lowland forest	2	2. temperate lowland forest	NULL
	Magnoliopsida	13	Santalales?	66	Santalaceae?	90	Aquilapollenites conatus	22	86	Angiosperm	1	Camp	1	Bihl, 1973	4	NULL	East Fork	17	75.0523	-79.8089	75.1359	-83.0625	74.1825	-86.7532	64.486	-125.709	73.1	3.2	75	temperate lowland forest	2	2. temperate lowland forest	NULL
	Magnoliopsida	13	Santalales?	66	Santalaceae?	90	Aquilapollenites dispositus	22	93	Angiosperm	1	Camp	1	Bihl, 1973	4	NULL	East Fork	17	75.0523	-79.8089	75.1359	-83.0625	74.1825	-86.7532	64.486	-125.709	73.1	3.2	75	temperate lowland forest	2	2. temperate lowland forest	NULL
	Magnoliopsida	13	Santalales?	66	Santalaceae?	90	Aquilapollenites dolium	22	94	Angiosperm	1	Camp	1	Bihl, 1973	4	NULL	East Fork	17	75.0523	-79.8089	75.1359	-83.0625	74.1825	-86.7532	64.486	-125.709	73.1	3.2	75	temperate lowland forest	2	2. temperate lowland forest	NULL
	Magnoliopsida	13	Santalales?	66	Santalaceae?	90	Aquilapollenites polaris	22	115	Angiosperm	1	Camp	1	Bihl, 1973	4	NULL	East Fork	17	75.0523	-79.8089	75.1359	-83.0625	74.1825	-86.7532	64.486	-125.709	73.1	3.2	75	temperate lowland forest	2	2. temperate lowland forest	NULL
	Magnoliopsida	13	Santalales?	66	Santalaceae?	90	Aquilapollenites reductus	22	125	Angiosperm	1	Camp	1	Bihl, 1973	4	NULL	East Fork	17	75.0523	-79.8089	75.1359	-83.0625	74.1825	-86.7532	64.486	-125.709	73.1	3.2	75	temperate lowland forest	2	2. temperate lowland forest	NULL
	Magnoliopsida	13	Santalales?	66	Santalaceae?	90	Aquilapollenites reticulatus	22	127	Angiosperm	1	Camp	1	Bihl, 1973	4	NULL	East Fork	17	75.0523	-79.8089	75.1359	-83.0625	74.1825	-86.7532	64.486	-125.709	73.1	3.2	75	temperate lowland forest	2	2. temperate lowland forest	NULL
	Magnoliopsida	13	Santalales?	66	Santalaceae?	90	Aquilapollenites spp.	22	135	Angiosperm	1	Camp	1	Bihl, 1973	4	NULL	East Fork	17	75.0523	-79.8089	75.1359	-83.0625	74.1825	-86.7532	64.486	-125.709	73.1	3.2	75	temperate lowland forest	2	2. temperate lowland forest	NULL
	Polypodiopsida	18	uncertain	80	uncertain	105	Baculatisporites comaumensis	30	181	Fern/Moss	2	Camp	1	Bihl, 1973	4	NULL	East Fork	17	75.0523	-79.8089	75.1359	-83.0625	74.1825	-86.7532	64.486	-125.709	73.1	3.2	75	coastal plain	4	4. coastal plain	NULL
	Polypodiopsida	18	uncertain	80	uncertain	105	Baculatisporites gemmatus	30	182	Fern/Moss	2	Camp	1	Bihl, 1973	4	NULL	East Fork	17	75.0523	-79.8089	75.1359	-83.0625	74.1825	-86.7532	64.486	-125.709	73.1	3.2	75	coastal plain	4	4. coastal plain	NULL
	Polypodiopsida	18	uncertain	80	uncertain	105	Baculatisporites ilexiformis	30	183	Fern/Moss	2	Camp	1	Bihl, 1973	4	NULL	East Fork	17	75.0523	-79.8089	75.1359	-83.0625	74.1825	-86.7532	64.486	-125.709	73.1	3.2	75	coastal plain	4	4. coastal plain	NULL
	Magnoliopsida	13	Magnoliales?	39	uncertain	105	Callistopollenites radiostriatus	43	216	Angiosperm	1	Camp	1	Bihl, 1973	4	NULL	East Fork	17	75.0523	-79.8089	75.1359	-83.0625	74.1825	-86.7532	64.486	-125.709	73.1	3.2	75	coastal plain	4	4. coastal plain	NULL
	Magnoliopsida	13	Magnoliales?	39	uncertain	105	Callistopollenites tumidiporus	43	217	Angiosperm	1	Camp	1	Bihl, 1973	4	NULL	East Fork	17	75.0523	-79.8089	75.1359	-83.0625	74.1825	-86.7532	64.486	-125.709	73.1	3.2	75	coastal plain	4	4. coastal plain	NULL
	Lycopodiopsida	12	Selaginellales	73	Selaginellaceae	95	Ceratosporites masulus	52	241	Fern/Moss	2	Camp	1	Bihl, 1973	4	NULL	East Fork	17	75.0523	-79.8089	75.1359	-83.0625	74.1825	-86.7532	64.486	-125.709	73.1	3.2	75	tropical lowland forest	6	6. tropical lowland forest	NULL
	Polypodiopsida?	19	uncertain	80	uncertain	105	Concavisporites sp.	70	310	Fern/Moss	2	Camp	1	Bihl, 1973	4	NULL	East Fork	17	75.0523	-79.8089	75.1359	-83.0625	74.1825	-86.7532	64.486	-125.709	73.1	3.2	75	coastal plain	4	4. coastal plain	NULL
	Magnoliopsida	13	Santalales?	66	Loranthaceae?	60	Cranwellia sp.	78	327	Angiosperm	1	Camp	1	Bihl, 1973	4	NULL	East Fork	17	75.0523	-79.8089	75.1359	-83.0625	74.1825	-86.7532	64.486	-125.709	73.1	3.2	75	temperate lowland forest	2	2. temperate lowland forest	NULL
	Polypodiopsida	18	uncertain	80	uncertain	105	Deltoidospora sp.	86	368	Fern/Moss	2	Camp	1	Bihl, 1973	4	NULL	East Fork	17	75.0523	-79.8089	75.1359	-83.0625	74.1825	-86.7532	64.486	-125.709	73.1	3.2	75	temperate lowland forest	2	2. temperate lowland forest	NULL
	Magnoliopsida	13	Buxales	8	Buxaceae	20	Erdtmanipollis pachysandroides	107	422	Angiosperm	1	Camp	1	Bihl, 1973	4	NULL	East Fork	17	75.0523	-79.8089	75.1359	-83.0625	74.1825	-86.7532	64.486	-125.709	73.1	3.2	75	temperate lowland forest	2	2. temperate lowland forest	NULL
	Magnoliopsida	13	Buxales	8	Buxaceae	20	Erdtmanipollis procumbentiformis	107	423	Angiosperm	1	Camp	1	Bihl, 1973	4	NULL	East Fork	17	75.0523	-79.8089	75.1359	-83.0625	74.1825	-86.7532	64.486	-125.709	73.1	3.2	75	temperate lowland forest	2	2. temperate lowland forest	NULL
	Magnoliopsida	13	Fagales?	29	Juglandaceae	55	Extratriporopollenites sp.	114	439	Angiosperm	1	Camp	1	Bihl, 1973	4	NULL	East Fork	17	75.0523	-79.8089	75.1359	-83.0625	74.1825	-86.7532	64.486	-125.709	73.1	3.2	75	swampy, lagoonal	3	3. swampy, lagoonal	NULL
	Lycopodiopsida	12	Lycopodiales?	37	Lycopodiaceae?	62	Foveotriletes sp.	121	461	Fern/Moss	2	Camp	1	Bihl, 1973	4	NULL	East Fork	17	75.0523	-79.8089	75.1359	-83.0625	74.1825	-86.7532	64.486	-125.709	73.1	3.2	75	estuarine, aquatic	7	7. estuarine, aquatic	NULL
	Polypodiopsida	18	Gleicheniales	30	Gleicheniaceae	49	Gleicheniidites senonicus	128	482	Fern/Moss	2	Camp	1	Bihl, 1973	4	NULL	East Fork	17	75.0523	-79.8089	75.1359	-83.0625	74.1825	-86.7532	64.486	-125.709	73.1	3.2	75	swampy, lagoonal	3	3. swampy, lagoonal	NULL
	Lycopodiopsida	12	Lycopodiales	36	Lycopodiaceae	61	Hamulatisporites hamulatis	136	501	Fern/Moss	2	Camp	1	Bihl, 1973	4	NULL	East Fork	17	75.0523	-79.8089	75.1359	-83.0625	74.1825	-86.7532	64.486	-125.709	73.1	3.2	75	temperate lowland forest	2	2. temperate lowland forest	NULL
	Polypodiopsida?	19	uncertain	80	uncertain	105	Hazaria sheopiarii	138	506	Fern/Moss	2	Camp	1	Bihl, 1973	4	NULL	East Fork	17	75.0523	-79.8089	75.1359	-83.0625	74.1825	-86.7532	64.486	-125.709	73.1	3.2	75	unknown	0	0. unknown	NULL
	Polypodiopsida	18	uncertain	80	uncertain	105	Laevigatosporites adiscordatus	158	558	Fern/Moss	2	Camp	1	Bihl, 1973	4	NULL	East Fork	17	75.0523	-79.8089	75.1359	-83.0625	74.1825	-86.7532	64.486	-125.709	73.1	3.2	75	coastal plain	4	4. coastal plain	NULL
	Polypodiopsida	18	uncertain	80	uncertain	105	Laevigatosporites ovatus	158	567	Fern/Moss	2	Camp	1	Bihl, 1973	4	NULL	East Fork	17	75.0523	-79.8089	75.1359	-83.0625	74.1825	-86.7532	64.486	-125.709	73.1	3.2	75	coastal plain	4	4. coastal plain	NULL
	Polypodiopsida	18	uncertain	80	uncertain	105	Leiotriletes sp.	161	576	Fern/Moss	2	Camp	1	Bihl, 1973	4	NULL	East Fork	17	75.0523	-79.8089	75.1359	-83.0625	74.1825	-86.7532	64.486	-125.709	73.1	3.2	75	swampy, lagoonal	3	3. swampy, lagoonal	NULL
	Lycopodiopsida	12	Lycopodiales	36	Lycopodiaceae	61	Leptolepidites bullatus	162	577	Fern/Moss	2	Camp	1	Bihl, 1973	4	NULL	East Fork	17	75.0523	-79.8089	75.1359	-83.0625	74.1825	-86.7532	64.486	-125.709	73.1	3.2	75	coastal plain	4	4. coastal plain	NULL
	Lycopodiopsida	12	Lycopodiales	36	Lycopodiaceae	61	Leptolepidites tenuis	162	581	Fern/Moss	2	Camp	1	Bihl, 1973	4	NULL	East Fork	17	75.0523	-79.8089	75.1359	-83.0625	74.1825	-86.7532	64.486	-125.709	73.1	3.2	75	coastal plain	4	4. coastal plain	NULL
	uncertain	23	uncertain	80	uncertain	105	Liburnisporites adnacus	167	586	Angiosperm	1	Camp	1	Bihl, 1973	4	NULL	East Fork	17	75.0523	-79.8089	75.1359	-83.0625	74.1825	-86.7532	64.486	-125.709	73.1	3.2	75	temperate lowland forest	2	2. temperate lowland forest	NULL
	Liliopsida	10	Liliales	34	uncertain	105	Liliacidites mirus	168	596	Angiosperm	1	Camp	1	Bihl, 1973	4	NULL	East Fork	17	75.0523	-79.8089	75.1359	-83.0625	74.1825	-86.7532	64.486	-125.709	73.1	3.2	75	temperate lowland forest	2	2. temperate lowland forest	NULL
	Magnoliopsida	13	Santalales	65	Loranthaceae	59	Loranthacites pilatus	171	605	Angiosperm	1	Camp	1	Bihl, 1973	4	NULL	East Fork	17	75.0523	-79.8089	75.1359	-83.0625	74.1825	-86.7532	64.486	-125.709	73.1	3.2	75	tropical lowland forest	6	6. tropical lowland forest	NULL
	Lycopodiopsida	12	Lycopodiales	36	Lycopodiaceae	61	Lycopodiumsporites sp.	175	621	Fern/Moss	2	Camp	1	Bihl, 1973	4	NULL	East Fork	17	75.0523	-79.8089	75.1359	-83.0625	74.1825	-86.7532	64.486	-125.709	73.1	3.2	75	upland forest	1	1. upland forest	NULL
	uncertain	23	uncertain	80	uncertain	105	Mancicorpus gibbus	180	634	Angiosperm	1	Camp	1	Bihl, 1973	4	NULL	East Fork	17	75.0523	-79.8089	75.1359	-83.0625	74.1825	-86.7532	64.486	-125.709	73.1	3.2	75	coastal plain	4	4. coastal plain	NULL
	uncertain	23	uncertain	80	uncertain	105	Mancicorpus pulcher	180	635	Angiosperm	1	Camp	1	Bihl, 1973	4	NULL	East Fork	17	75.0523	-79.8089	75.1359	-83.0625	74.1825	-86.7532	64.486	-125.709	73.1	3.2	75	coastal plain	4	4. coastal plain	NULL
	uncertain	23	uncertain	80	uncertain	105	Mancicorpus rostratus	180	636	Angiosperm	1	Camp	1	Bihl, 1973	4	NULL	East Fork	17	75.0523	-79.8089	75.1359	-83.0625	74.1825	-86.7532	64.486	-125.709	73.1	3.2	75	coastal plain	4	4. coastal plain	NULL
	uncertain	23	uncertain	80	uncertain	105	Mancicorpus senonicum	180	637	Angiosperm	1	Camp	1	Bihl, 1973	4	NULL	East Fork	17	75.0523	-79.8089	75.1359	-83.0625	74.1825	-86.7532	64.486	-125.709	73.1	3.2	75	coastal plain	4	4. coastal plain	NULL
	Polypodiopsida	18	Osmundales	51	Osmundaceae	74	Osmundacidites wellmanii	215	723	Fern/Moss	2	Camp	1	Bihl, 1973	4	NULL	East Fork	17	75.0523	-79.8089	75.1359	-83.0625	74.1825	-86.7532	64.486	-125.709	73.1	3.2	75	temperate lowland forest	2	2. temperate lowland forest	NULL
	Pinopsida	16	Pinales	54	Podocarpaceae	79	Podocarpites sp.	249	795	Gymnosperm	3	Camp	1	Bihl, 1973	4	NULL	East Fork	17	75.0523	-79.8089	75.1359	-83.0625	74.1825	-86.7532	64.486	-125.709	73.1	3.2	75	temperate lowland forest	2	2. temperate lowland forest	NULL
	Magnoliopsida	13	Proteales	61	uncertain	105	Proteacidites angulatus	262	823	Angiosperm	1	Camp	1	Bihl, 1973	4	NULL	East Fork	17	75.0523	-79.8089	75.1359	-83.0625	74.1825	-86.7532	64.486	-125.709	73.1	3.2	75	unknown	0	0. unknown	NULL
	Magnoliopsida	13	Proteales	61	uncertain	105	Proteacidites asper	262	824	Angiosperm	1	Camp	1	Bihl, 1973	4	NULL	East Fork	17	75.0523	-79.8089	75.1359	-83.0625	74.1825	-86.7532	64.486	-125.709	73.1	3.2	75	unknown	0	0. unknown	NULL
	Magnoliopsida	13	Proteales	61	uncertain	105	Proteacidites crispus	262	826	Angiosperm	1	Camp	1	Bihl, 1973	4	NULL	East Fork	17	75.0523	-79.8089	75.1359	-83.0625	74.1825	-86.7532	64.486	-125.709	73.1	3.2	75	unknown	0	0. unknown	NULL
	Magnoliopsida	13	Proteales	61	uncertain	105	Proteacidites occallatus	262	828	Angiosperm	1	Camp	1	Bihl, 1973	4	NULL	East Fork	17	75.0523	-79.8089	75.1359	-83.0625	74.1825	-86.7532	64.486	-125.709	73.1	3.2	75	unknown	0	0. unknown	NULL
	Magnoliopsida	13	Proteales	61	uncertain	105	Proteacidites thalmanii	262	835	Angiosperm	1	Camp	1	Bihl, 1973	4	NULL	East Fork	17	75.0523	-79.8089	75.1359	-83.0625	74.1825	-86.7532	64.486	-125.709	73.1	3.2	75	unknown	0	0. unknown	NULL
	uncertain	23	uncertain	80	uncertain	105	Pulcheripollenites krempii	272	851	Angiosperm	1	Camp	1	Bihl, 1973	4	NULL	East Fork	17	75.0523	-79.8089	75.1359	-83.0625	74.1825	-86.7532	64.486	-125.709	73.1	3.2	75	swampy, lagoonal	3	3. swampy, lagoonal	NULL
	Magnoliopsida	13	Magnoliales?	39	uncertain	105	Retitricolpites foveoloides	290	881	Angiosperm	1	Camp	1	Bihl, 1973	4	NULL	East Fork	17	75.0523	-79.8089	75.1359	-83.0625	74.1825	-86.7532	64.486	-125.709	73.1	3.2	75	coastal plain	4	4. coastal plain	NULL
	Lycopodiopsida	12	Lycopodiales	36	Lycopodiaceae	61	Retitriletes austroclavatides	291	887	Fern/Moss	2	Camp	1	Bihl, 1973	4	NULL	East Fork	17	75.0523	-79.8089	75.1359	-83.0625	74.1825	-86.7532	64.486	-125.709	73.1	3.2	75	upland forest	1	1. upland forest	NULL
	Magnoliopsida	13	Santalales	65	Santalaceae	89	Santalumidites sp.	304	926	Angiosperm	1	Camp	1	Bihl, 1973	4	NULL	East Fork	17	75.0523	-79.8089	75.1359	-83.0625	74.1825	-86.7532	64.486	-125.709	73.1	3.2	75	temperate lowland forest	2	2. temperate lowland forest	NULL
	uncertain	23	uncertain	80	uncertain	105	Scollardia normanensis	308	937	Angiosperm	1	Camp	1	Bihl, 1973	4	NULL	East Fork	17	75.0523	-79.8089	75.1359	-83.0625	74.1825	-86.7532	64.486	-125.709	73.1	3.2	75	swampy, lagoonal	3	3. swampy, lagoonal	NULL
	Bryopsida	3	uncertain	80	uncertain	105	Stereisporites antiquasporites	329	987	Fern/Moss	2	Camp	1	Bihl, 1973	4	NULL	East Fork	17	75.0523	-79.8089	75.1359	-83.0625	74.1825	-86.7532	64.486	-125.709	73.1	3.2	75	coastal plain	4	4. coastal plain	NULL
	uncertain	23	uncertain	80	uncertain	105	Styx minor	334	1002	Gymnosperm	3	Camp	1	Bihl, 1973	4	NULL	East Fork	17	75.0523	-79.8089	75.1359	-83.0625	74.1825	-86.7532	64.486	-125.709	73.1	3.2	75	wet, successional	5	5. wet, successional	NULL
	Bryopsida?	4	uncertain	80	uncertain	105	Taurocusporites segmentatus	340	1011	Fern/Moss	2	Camp	1	Bihl, 1973	4	NULL	East Fork	17	75.0523	-79.8089	75.1359	-83.0625	74.1825	-86.7532	64.486	-125.709	73.1	3.2	75	temperate lowland forest	2	2. temperate lowland forest	NULL
	Pinopsida	16	Pinales	54	Cupressaceae?	30	Taxodiaceaepollenites sp.	343	1016	Gymnosperm	3	Camp	1	Bihl, 1973	4	NULL	East Fork	17	75.0523	-79.8089	75.1359	-83.0625	74.1825	-86.7532	64.486	-125.709	73.1	3.2	75	temperate lowland forest	2	2. temperate lowland forest	NULL
	Magnoliopsida	13	Magnoliales?	39	uncertain	105	Tricolpites matauraensis	358	1064	Angiosperm	1	Camp	1	Bihl, 1973	4	NULL	East Fork	17	75.0523	-79.8089	75.1359	-83.0625	74.1825	-86.7532	64.486	-125.709	73.1	3.2	75	coastal plain	4	4. coastal plain	NULL
	Polypodiopsida	18	Schizaeales	71	Lygodiaceae	63	Varirugosisporites sp.	384	1170	Fern/Moss	2	Camp	1	Bihl, 1973	4	NULL	East Fork	17	75.0523	-79.8089	75.1359	-83.0625	74.1825	-86.7532	64.486	-125.709	73.1	3.2	75	tropical lowland forest	6	6. tropical lowland forest	NULL
	uncertain	23	uncertain	80	uncertain	105	Wodehouseia sp.	396	1195	Angiosperm	1	Camp	1	Bihl, 1973	4	NULL	East Fork	17	75.0523	-79.8089	75.1359	-83.0625	74.1825	-86.7532	64.486	-125.709	73.1	3.2	75	swampy, lagoonal	3	3. swampy, lagoonal	NULL
	uncertain	23	uncertain	80	uncertain	105	Wodehouseia spinata	396	1196	Angiosperm	1	Camp	1	Bihl, 1973	4	NULL	East Fork	17	75.0523	-79.8089	75.1359	-83.0625	74.1825	-86.7532	64.486	-125.709	73.1	3.2	75	swampy, lagoonal	3	3. swampy, lagoonal	NULL
	uncertain	23	uncertain	80	uncertain	105	Zlivisporites sp.	398	1206	Fern/Moss	2	Camp	1	Bihl, 1973	4	NULL	East Fork	17	75.0523	-79.8089	75.1359	-83.0625	74.1825	-86.7532	64.486	-125.709	73.1	3.2	75	swampy, lagoonal	3	3. swampy, lagoonal	NULL
	Magnoliopsida	13	Santalales?	66	uncertain	105	Accuratipollis lactiflumis	5	12	Angiosperm	1	Camp	1	Braman and Koppelhus, 2005	5	NULL	Dinosaur Park	16	59.4817	-76.5069	59.5952	-78.812	58.6799	-81.7717	50.7595	-111.482	76.35	0.55	75	swampy, lagoonal	3	3. swampy, lagoonal	NULL
	Magnoliopsida	13	Santalales?	66	uncertain	105	Accuratipollis macrosolenoides	5	13	Angiosperm	1	Camp	1	Braman and Koppelhus, 2005	5	NULL	Dinosaur Park	16	59.4817	-76.5069	59.5952	-78.812	58.6799	-81.7717	50.7595	-111.482	76.35	0.55	75	swampy, lagoonal	3	3. swampy, lagoonal	NULL
	Magnoliopsida	13	Sapindales	67	Sapindaceae	91	Acer modicus	6	15	Angiosperm	1	Camp	1	Braman and Koppelhus, 2005	5	NULL	Dinosaur Park	16	59.4817	-76.5069	59.5952	-78.812	58.6799	-81.7717	50.7595	-111.482	76.35	0.55	75	temperate lowland forest	2	2. temperate lowland forest	NULL
	Polypodiopsida?	19	Schizaeales?	72	uncertain	105	Acritosporites sp.	7	16	Fern/Moss	2	Camp	1	Braman and Koppelhus, 2005	5	NULL	Dinosaur Park	16	59.4817	-76.5069	59.5952	-78.812	58.6799	-81.7717	50.7595	-111.482	76.35	0.55	75	unknown	0	0. unknown	NULL
	Marchantiopsida	15	Sphaerocarpales	75	uncertain	105	Aequitriradites conulatus	9	18	Fern/Moss	2	Camp	1	Braman and Koppelhus, 2005	5	NULL	Dinosaur Park	16	59.4817	-76.5069	59.5952	-78.812	58.6799	-81.7717	50.7595	-111.482	76.35	0.55	75	coastal plain	4	4. coastal plain	NULL
	Marchantiopsida	15	Sphaerocarpales	75	uncertain	105	Aequitriradites sp.	9	20	Fern/Moss	2	Camp	1	Braman and Koppelhus, 2005	5	NULL	Dinosaur Park	16	59.4817	-76.5069	59.5952	-78.812	58.6799	-81.7717	50.7595	-111.482	76.35	0.55	75	coastal plain	4	4. coastal plain	NULL
	Marchantiopsida	15	Sphaerocarpales	75	uncertain	105	Aequitriradites spinulosus	9	21	Fern/Moss	2	Camp	1	Braman and Koppelhus, 2005	5	NULL	Dinosaur Park	16	59.4817	-76.5069	59.5952	-78.812	58.6799	-81.7717	50.7595	-111.482	76.35	0.55	75	coastal plain	4	4. coastal plain	NULL
	Marchantiopsida	15	Sphaerocarpales	75	uncertain	105	Aequitriradites tilchaensis	9	22	Fern/Moss	2	Camp	1	Braman and Koppelhus, 2005	5	NULL	Dinosaur Park	16	59.4817	-76.5069	59.5952	-78.812	58.6799	-81.7717	50.7595	-111.482	76.35	0.55	75	coastal plain	4	4. coastal plain	NULL
	Marchantiopsida	15	Sphaerocarpales	75	uncertain	105	Aequitriradites verrucosus	9	23	Fern/Moss	2	Camp	1	Braman and Koppelhus, 2005	5	NULL	Dinosaur Park	16	59.4817	-76.5069	59.5952	-78.812	58.6799	-81.7717	50.7595	-111.482	76.35	0.55	75	coastal plain	4	4. coastal plain	NULL
	Pinopsida	16	Pinales?	55	uncertain	105	Alisporites bilateralis	13	29	Gymnosperm	3	Camp	1	Braman and Koppelhus, 2005	5	NULL	Dinosaur Park	16	59.4817	-76.5069	59.5952	-78.812	58.6799	-81.7717	50.7595	-111.482	76.35	0.55	75	coastal plain	4	4. coastal plain	NULL
	Pinopsida	16	Pinales?	55	uncertain	105	Alisporites grandis	13	30	Gymnosperm	3	Camp	1	Braman and Koppelhus, 2005	5	NULL	Dinosaur Park	16	59.4817	-76.5069	59.5952	-78.812	58.6799	-81.7717	50.7595	-111.482	76.35	0.55	75	coastal plain	4	4. coastal plain	NULL
	Magnoliopsida	13	Santalales	65	uncertain	105	Anacolosidites grandis	17	41	Angiosperm	1	Camp	1	Braman and Koppelhus, 2005	5	NULL	Dinosaur Park	16	59.4817	-76.5069	59.5952	-78.812	58.6799	-81.7717	50.7595	-111.482	76.35	0.55	75	tropical lowland forest	6	6. tropical lowland forest	NULL
	Magnoliopsida	13	Santalales?	66	Santalaceae?	90	Aquilapollenites amicus	22	61	Angiosperm	1	Camp	1	Braman and Koppelhus, 2005	5	NULL	Dinosaur Park	16	59.4817	-76.5069	59.5952	-78.812	58.6799	-81.7717	50.7595	-111.482	76.35	0.55	75	temperate lowland forest	2	2. temperate lowland forest	NULL
	Magnoliopsida	13	Santalales?	66	Santalaceae?	90	Aquilapollenites amygdoloides	22	63	Angiosperm	1	Camp	1	Braman and Koppelhus, 2005	5	NULL	Dinosaur Park	16	59.4817	-76.5069	59.5952	-78.812	58.6799	-81.7717	50.7595	-111.482	76.35	0.55	75	temperate lowland forest	2	2. temperate lowland forest	NULL
	Magnoliopsida	13	Santalales?	66	Santalaceae?	90	Aquilapollenites attenuatus	22	69	Angiosperm	1	Camp	1	Braman and Koppelhus, 2005	5	NULL	Dinosaur Park	16	59.4817	-76.5069	59.5952	-78.812	58.6799	-81.7717	50.7595	-111.482	76.35	0.55	75	temperate lowland forest	2	2. temperate lowland forest	NULL
	Magnoliopsida	13	Santalales?	66	Santalaceae?	90	Aquilapollenites augustus	22	71	Angiosperm	1	Camp	1	Braman and Koppelhus, 2005	5	NULL	Dinosaur Park	16	59.4817	-76.5069	59.5952	-78.812	58.6799	-81.7717	50.7595	-111.482	76.35	0.55	75	temperate lowland forest	2	2. temperate lowland forest	NULL
	Magnoliopsida	13	Santalales?	66	Santalaceae?	90	Aquilapollenites cf. rectus	22	82	Angiosperm	1	Camp	1	Braman and Koppelhus, 2005	5	NULL	Dinosaur Park	16	59.4817	-76.5069	59.5952	-78.812	58.6799	-81.7717	50.7595	-111.482	76.35	0.55	75	temperate lowland forest	2	2. temperate lowland forest	NULL
	Magnoliopsida	13	Santalales?	66	Santalaceae?	90	Aquilapollenites datongensis	22	87	Angiosperm	1	Camp	1	Braman and Koppelhus, 2005	5	NULL	Dinosaur Park	16	59.4817	-76.5069	59.5952	-78.812	58.6799	-81.7717	50.7595	-111.482	76.35	0.55	75	temperate lowland forest	2	2. temperate lowland forest	NULL
	Magnoliopsida	13	Santalales?	66	Santalaceae?	90	Aquilapollenites drumhellerensis	22	95	Angiosperm	1	Camp	1	Braman and Koppelhus, 2005	5	NULL	Dinosaur Park	16	59.4817	-76.5069	59.5952	-78.812	58.6799	-81.7717	50.7595	-111.482	76.35	0.55	75	temperate lowland forest	2	2. temperate lowland forest	NULL
	Magnoliopsida	13	Santalales?	66	Santalaceae?	90	Aquilapollenites funkhouseri	22	97	Angiosperm	1	Camp	1	Braman and Koppelhus, 2005	5	NULL	Dinosaur Park	16	59.4817	-76.5069	59.5952	-78.812	58.6799	-81.7717	50.7595	-111.482	76.35	0.55	75	temperate lowland forest	2	2. temperate lowland forest	NULL
	Magnoliopsida	13	Santalales?	66	Santalaceae?	90	Aquilapollenites leucocephalus	22	103	Angiosperm	1	Camp	1	Braman and Koppelhus, 2005	5	NULL	Dinosaur Park	16	59.4817	-76.5069	59.5952	-78.812	58.6799	-81.7717	50.7595	-111.482	76.35	0.55	75	temperate lowland forest	2	2. temperate lowland forest	NULL
	Magnoliopsida	13	Santalales?	66	Santalaceae?	90	Aquilapollenites medeis	22	106	Angiosperm	1	Camp	1	Braman and Koppelhus, 2005	5	NULL	Dinosaur Park	16	59.4817	-76.5069	59.5952	-78.812	58.6799	-81.7717	50.7595	-111.482	76.35	0.55	75	temperate lowland forest	2	2. temperate lowland forest	NULL
	Magnoliopsida	13	Santalales?	66	Santalaceae?	90	Aquilapollenites mtchedlishvilii	22	109	Angiosperm	1	Camp	1	Braman and Koppelhus, 2005	5	NULL	Dinosaur Park	16	59.4817	-76.5069	59.5952	-78.812	58.6799	-81.7717	50.7595	-111.482	76.35	0.55	75	temperate lowland forest	2	2. temperate lowland forest	NULL
	Magnoliopsida	13	Santalales?	66	Santalaceae?	90	Aquilapollenites parallelus	22	113	Angiosperm	1	Camp	1	Braman and Koppelhus, 2005	5	NULL	Dinosaur Park	16	59.4817	-76.5069	59.5952	-78.812	58.6799	-81.7717	50.7595	-111.482	76.35	0.55	75	temperate lowland forest	2	2. temperate lowland forest	NULL
	Magnoliopsida	13	Santalales?	66	Santalaceae?	90	Aquilapollenites procerus	22	116	Angiosperm	1	Camp	1	Braman and Koppelhus, 2005	5	NULL	Dinosaur Park	16	59.4817	-76.5069	59.5952	-78.812	58.6799	-81.7717	50.7595	-111.482	76.35	0.55	75	temperate lowland forest	2	2. temperate lowland forest	NULL
	Magnoliopsida	13	Santalales?	66	Santalaceae?	90	Aquilapollenites quadrilobus	22	124	Angiosperm	1	Camp	1	Braman and Koppelhus, 2005	5	NULL	Dinosaur Park	16	59.4817	-76.5069	59.5952	-78.812	58.6799	-81.7717	50.7595	-111.482	76.35	0.55	75	temperate lowland forest	2	2. temperate lowland forest	NULL
	Magnoliopsida	13	Santalales?	66	Santalaceae?	90	Aquilapollenites rigidus	22	128	Angiosperm	1	Camp	1	Braman and Koppelhus, 2005	5	NULL	Dinosaur Park	16	59.4817	-76.5069	59.5952	-78.812	58.6799	-81.7717	50.7595	-111.482	76.35	0.55	75	temperate lowland forest	2	2. temperate lowland forest	NULL
	Magnoliopsida	13	Santalales?	66	Santalaceae?	90	Aquilapollenites senonicus	22	129	Angiosperm	1	Camp	1	Braman and Koppelhus, 2005	5	NULL	Dinosaur Park	16	59.4817	-76.5069	59.5952	-78.812	58.6799	-81.7717	50.7595	-111.482	76.35	0.55	75	temperate lowland forest	2	2. temperate lowland forest	NULL
	Magnoliopsida	13	Santalales?	66	Santalaceae?	90	Aquilapollenites spp.	22	135	Angiosperm	1	Camp	1	Braman and Koppelhus, 2005	5	NULL	Dinosaur Park	16	59.4817	-76.5069	59.5952	-78.812	58.6799	-81.7717	50.7595	-111.482	76.35	0.55	75	temperate lowland forest	2	2. temperate lowland forest	NULL
	Magnoliopsida	13	Santalales?	66	Santalaceae?	90	Aquilapollenites stelckii	22	136	Angiosperm	1	Camp	1	Braman and Koppelhus, 2005	5	NULL	Dinosaur Park	16	59.4817	-76.5069	59.5952	-78.812	58.6799	-81.7717	50.7595	-111.482	76.35	0.55	75	temperate lowland forest	2	2. temperate lowland forest	NULL
	Magnoliopsida	13	Santalales?	66	Santalaceae?	90	Aquilapollenites trialatus	22	139	Angiosperm	1	Camp	1	Braman and Koppelhus, 2005	5	NULL	Dinosaur Park	16	59.4817	-76.5069	59.5952	-78.812	58.6799	-81.7717	50.7595	-111.482	76.35	0.55	75	temperate lowland forest	2	2. temperate lowland forest	NULL
	Magnoliopsida	13	Santalales?	66	Santalaceae?	90	Aquilapollenites turbidus	22	141	Angiosperm	1	Camp	1	Braman and Koppelhus, 2005	5	NULL	Dinosaur Park	16	59.4817	-76.5069	59.5952	-78.812	58.6799	-81.7717	50.7595	-111.482	76.35	0.55	75	temperate lowland forest	2	2. temperate lowland forest	NULL
	Magnoliopsida	13	Santalales?	66	Santalaceae?	90	Aquilapollenites validus	22	143	Angiosperm	1	Camp	1	Braman and Koppelhus, 2005	5	NULL	Dinosaur Park	16	59.4817	-76.5069	59.5952	-78.812	58.6799	-81.7717	50.7595	-111.482	76.35	0.55	75	temperate lowland forest	2	2. temperate lowland forest	NULL
	Liliopsida	10	Arecales	6	uncertain	105	Arecipites barakati	25	150	Angiosperm	1	Camp	1	Braman and Koppelhus, 2005	5	NULL	Dinosaur Park	16	59.4817	-76.5069	59.5952	-78.812	58.6799	-81.7717	50.7595	-111.482	76.35	0.55	75	swampy, lagoonal	3	3. swampy, lagoonal	NULL
	Anthocerotopsida	1	Notothyladales?	48	uncertain	105	Asterisporites chlonovae	26	158	Fern/Moss	2	Camp	1	Braman and Koppelhus, 2005	5	NULL	Dinosaur Park	16	59.4817	-76.5069	59.5952	-78.812	58.6799	-81.7717	50.7595	-111.482	76.35	0.55	75	coastal plain	4	4. coastal plain	NULL
	Anthocerotopsida	1	Notothyladales?	48	uncertain	105	Asterisporites radiatus	26	159	Fern/Moss	2	Camp	1	Braman and Koppelhus, 2005	5	NULL	Dinosaur Park	16	59.4817	-76.5069	59.5952	-78.812	58.6799	-81.7717	50.7595	-111.482	76.35	0.55	75	coastal plain	4	4. coastal plain	NULL
	uncertain	23	uncertain	80	uncertain	105	Azonia calvata	29	175	Angiosperm	1	Camp	1	Braman and Koppelhus, 2005	5	NULL	Dinosaur Park	16	59.4817	-76.5069	59.5952	-78.812	58.6799	-81.7717	50.7595	-111.482	76.35	0.55	75	unknown	0	0. unknown	NULL
	uncertain	23	uncertain	80	uncertain	105	Azonia cribrata	29	176	Angiosperm	1	Camp	1	Braman and Koppelhus, 2005	5	NULL	Dinosaur Park	16	59.4817	-76.5069	59.5952	-78.812	58.6799	-81.7717	50.7595	-111.482	76.35	0.55	75	unknown	0	0. unknown	NULL
	uncertain	23	uncertain	80	uncertain	105	Azonia ovata	29	177	Angiosperm	1	Camp	1	Braman and Koppelhus, 2005	5	NULL	Dinosaur Park	16	59.4817	-76.5069	59.5952	-78.812	58.6799	-81.7717	50.7595	-111.482	76.35	0.55	75	unknown	0	0. unknown	NULL
	uncertain	23	uncertain	80	uncertain	105	Azonia pulchella	29	178	Angiosperm	1	Camp	1	Braman and Koppelhus, 2005	5	NULL	Dinosaur Park	16	59.4817	-76.5069	59.5952	-78.812	58.6799	-81.7717	50.7595	-111.482	76.35	0.55	75	unknown	0	0. unknown	NULL
	uncertain	23	uncertain	80	uncertain	105	Azonia sp.	29	180	Angiosperm	1	Camp	1	Braman and Koppelhus, 2005	5	NULL	Dinosaur Park	16	59.4817	-76.5069	59.5952	-78.812	58.6799	-81.7717	50.7595	-111.482	76.35	0.55	75	unknown	0	0. unknown	NULL
	Polypodiopsida	18	uncertain	80	uncertain	105	Baculatisporites comaumensis	30	181	Fern/Moss	2	Camp	1	Braman and Koppelhus, 2005	5	NULL	Dinosaur Park	16	59.4817	-76.5069	59.5952	-78.812	58.6799	-81.7717	50.7595	-111.482	76.35	0.55	75	coastal plain	4	4. coastal plain	NULL
	Polypodiopsida	18	uncertain	80	uncertain	105	Baculatisporites sp.	30	184	Fern/Moss	2	Camp	1	Braman and Koppelhus, 2005	5	NULL	Dinosaur Park	16	59.4817	-76.5069	59.5952	-78.812	58.6799	-81.7717	50.7595	-111.482	76.35	0.55	75	coastal plain	4	4. coastal plain	NULL
	Magnoliopsida	13	Fagales?	29	Betulaceae?	19	Betulaceoipollenites infrequens	36	203	Angiosperm	1	Camp	1	Braman and Koppelhus, 2005	5	NULL	Dinosaur Park	16	59.4817	-76.5069	59.5952	-78.812	58.6799	-81.7717	50.7595	-111.482	76.35	0.55	75	temperate lowland forest	2	2. temperate lowland forest	NULL
	Polypodiopsida	18	Schizaeales	71	Schizaeaceae	93	Biretisporites deltoidus	38	206	Fern/Moss	2	Camp	1	Braman and Koppelhus, 2005	5	NULL	Dinosaur Park	16	59.4817	-76.5069	59.5952	-78.812	58.6799	-81.7717	50.7595	-111.482	76.35	0.55	75	temperate lowland forest	2	2. temperate lowland forest	NULL
	Pinopsida	16	Pinales	54	uncertain	105	Callialasporites dampieri	42	213	Gymnosperm	3	Camp	1	Braman and Koppelhus, 2005	5	NULL	Dinosaur Park	16	59.4817	-76.5069	59.5952	-78.812	58.6799	-81.7717	50.7595	-111.482	76.35	0.55	75	upland forest	1	1. upland forest	NULL
	Lycopodiopsida	12	Lycopodiales	36	uncertain	105	Camarozonosporites ambigens	44	219	Fern/Moss	2	Camp	1	Braman and Koppelhus, 2005	5	NULL	Dinosaur Park	16	59.4817	-76.5069	59.5952	-78.812	58.6799	-81.7717	50.7595	-111.482	76.35	0.55	75	coastal plain	4	4. coastal plain	NULL
	Lycopodiopsida	12	Lycopodiales	36	uncertain	105	Camarozonosporites sp.	44	226	Fern/Moss	2	Camp	1	Braman and Koppelhus, 2005	5	NULL	Dinosaur Park	16	59.4817	-76.5069	59.5952	-78.812	58.6799	-81.7717	50.7595	-111.482	76.35	0.55	75	coastal plain	4	4. coastal plain	NULL
	Magnoliopsida	13	Magnoliales?	39	uncertain	105	Caryapollenites paleocenica	50	234	Angiosperm	1	Camp	1	Braman and Koppelhus, 2005	5	NULL	Dinosaur Park	16	59.4817	-76.5069	59.5952	-78.812	58.6799	-81.7717	50.7595	-111.482	76.35	0.55	75	temperate lowland forest	2	2. temperate lowland forest	NULL
	Lycopodiopsida	12	Selaginellales	73	Selaginellaceae	95	Ceratosporites acutus	52	239	Fern/Moss	2	Camp	1	Braman and Koppelhus, 2005	5	NULL	Dinosaur Park	16	59.4817	-76.5069	59.5952	-78.812	58.6799	-81.7717	50.7595	-111.482	76.35	0.55	75	tropical lowland forest	6	6. tropical lowland forest	NULL
	Polypodiopsida	18	Cyatheales?	17	Cibotiaceae?	28	Cibotiumspora clavata	57	251	Fern/Moss	2	Camp	1	Braman and Koppelhus, 2005	5	NULL	Dinosaur Park	16	59.4817	-76.5069	59.5952	-78.812	58.6799	-81.7717	50.7595	-111.482	76.35	0.55	75	temperate lowland forest	2	2. temperate lowland forest	NULL
	Polypodiopsida	18	Cyatheales?	17	Cibotiaceae?	28	Cibotiumspora juncta	57	252	Fern/Moss	2	Camp	1	Braman and Koppelhus, 2005	5	NULL	Dinosaur Park	16	59.4817	-76.5069	59.5952	-78.812	58.6799	-81.7717	50.7595	-111.482	76.35	0.55	75	temperate lowland forest	2	2. temperate lowland forest	NULL
	Polypodiopsida	18	Cyatheales?	17	Cibotiaceae?	28	Cibotiumspora sp.	57	253	Fern/Moss	2	Camp	1	Braman and Koppelhus, 2005	5	NULL	Dinosaur Park	16	59.4817	-76.5069	59.5952	-78.812	58.6799	-81.7717	50.7595	-111.482	76.35	0.55	75	temperate lowland forest	2	2. temperate lowland forest	NULL
	Polypodiopsida	18	Schizaeales	71	Schizaeaceae	93	Cicatricosisporites almegrensis	58	254	Fern/Moss	2	Camp	1	Braman and Koppelhus, 2005	5	NULL	Dinosaur Park	16	59.4817	-76.5069	59.5952	-78.812	58.6799	-81.7717	50.7595	-111.482	76.35	0.55	75	temperate lowland forest	2	2. temperate lowland forest	NULL
	Polypodiopsida	18	Schizaeales	71	Schizaeaceae	93	Cicatricosisporites cuneiformis	58	260	Fern/Moss	2	Camp	1	Braman and Koppelhus, 2005	5	NULL	Dinosaur Park	16	59.4817	-76.5069	59.5952	-78.812	58.6799	-81.7717	50.7595	-111.482	76.35	0.55	75	temperate lowland forest	2	2. temperate lowland forest	NULL
	Polypodiopsida	18	Schizaeales	71	Schizaeaceae	93	Cicatricosisporites mesozoicus	58	267	Fern/Moss	2	Camp	1	Braman and Koppelhus, 2005	5	NULL	Dinosaur Park	16	59.4817	-76.5069	59.5952	-78.812	58.6799	-81.7717	50.7595	-111.482	76.35	0.55	75	temperate lowland forest	2	2. temperate lowland forest	NULL
	Polypodiopsida	18	Schizaeales	71	Schizaeaceae	93	Cicatricosisporites neumanii	58	268	Fern/Moss	2	Camp	1	Braman and Koppelhus, 2005	5	NULL	Dinosaur Park	16	59.4817	-76.5069	59.5952	-78.812	58.6799	-81.7717	50.7595	-111.482	76.35	0.55	75	temperate lowland forest	2	2. temperate lowland forest	NULL
	Polypodiopsida	18	Schizaeales	71	Schizaeaceae	93	Cicatricosisporites ornatus	58	270	Fern/Moss	2	Camp	1	Braman and Koppelhus, 2005	5	NULL	Dinosaur Park	16	59.4817	-76.5069	59.5952	-78.812	58.6799	-81.7717	50.7595	-111.482	76.35	0.55	75	temperate lowland forest	2	2. temperate lowland forest	NULL
	Polypodiopsida	18	Schizaeales	71	Schizaeaceae	93	Cicatricosisporites sp.	58	273	Fern/Moss	2	Camp	1	Braman and Koppelhus, 2005	5	NULL	Dinosaur Park	16	59.4817	-76.5069	59.5952	-78.812	58.6799	-81.7717	50.7595	-111.482	76.35	0.55	75	temperate lowland forest	2	2. temperate lowland forest	NULL
	Polypodiopsida	18	Schizaeales	71	Schizaeaceae	93	Cicatricosisporites sprumonti	58	275	Fern/Moss	2	Camp	1	Braman and Koppelhus, 2005	5	NULL	Dinosaur Park	16	59.4817	-76.5069	59.5952	-78.812	58.6799	-81.7717	50.7595	-111.482	76.35	0.55	75	temperate lowland forest	2	2. temperate lowland forest	NULL
	Polypodiopsida	18	Schizaeales	71	Schizaeaceae	93	Cicatricosisporites stoveri	58	276	Fern/Moss	2	Camp	1	Braman and Koppelhus, 2005	5	NULL	Dinosaur Park	16	59.4817	-76.5069	59.5952	-78.812	58.6799	-81.7717	50.7595	-111.482	76.35	0.55	75	temperate lowland forest	2	2. temperate lowland forest	NULL
	Polypodiopsida	18	Schizaeales	71	Schizaeaceae	93	Cicatricosisporites norrisii	58	269	Fern/Moss	2	Camp	1	Braman and Koppelhus, 2005	5	NULL	Dinosaur Park	16	59.4817	-76.5069	59.5952	-78.812	58.6799	-81.7717	50.7595	-111.482	76.35	0.55	75	temperate lowland forest	2	2. temperate lowland forest	NULL
	Anthocerotopsida	1	Anthocerotales?	2	Anthocerotaceae?	4	Cingulatisporites dakotaensis	59	280	Fern/Moss	2	Camp	1	Braman and Koppelhus, 2005	5	NULL	Dinosaur Park	16	59.4817	-76.5069	59.5952	-78.812	58.6799	-81.7717	50.7595	-111.482	76.35	0.55	75	coastal plain	4	4. coastal plain	NULL
	Bryopsida	3	uncertain	80	uncertain	105	Cingutriletes sp.	61	290	Fern/Moss	2	Camp	1	Braman and Koppelhus, 2005	5	NULL	Dinosaur Park	16	59.4817	-76.5069	59.5952	-78.812	58.6799	-81.7717	50.7595	-111.482	76.35	0.55	75	coastal plain	4	4. coastal plain	NULL
	Pinopsida?	17	uncertain	80	uncertain	105	Circulina parva	62	291	Gymnosperm	3	Camp	1	Braman and Koppelhus, 2005	5	NULL	Dinosaur Park	16	59.4817	-76.5069	59.5952	-78.812	58.6799	-81.7717	50.7595	-111.482	76.35	0.55	75	unknown	0	0. unknown	NULL
	Marchantiopsida	15	uncertain	80	uncertain	105	Cirratriradites luminosus	64	293	Fern/Moss	2	Camp	1	Braman and Koppelhus, 2005	5	NULL	Dinosaur Park	16	59.4817	-76.5069	59.5952	-78.812	58.6799	-81.7717	50.7595	-111.482	76.35	0.55	75	swampy, lagoonal	3	3. swampy, lagoonal	NULL
	Marchantiopsida	15	uncertain	80	uncertain	105	Cirratriradites sp.	64	294	Fern/Moss	2	Camp	1	Braman and Koppelhus, 2005	5	NULL	Dinosaur Park	16	59.4817	-76.5069	59.5952	-78.812	58.6799	-81.7717	50.7595	-111.482	76.35	0.55	75	swampy, lagoonal	3	3. swampy, lagoonal	NULL
	Pinopsida	16	Pinales	54	Cheirolepidiaceae	25	Classopollis classoides	65	297	Gymnosperm	3	Camp	1	Braman and Koppelhus, 2005	5	NULL	Dinosaur Park	16	59.4817	-76.5069	59.5952	-78.812	58.6799	-81.7717	50.7595	-111.482	76.35	0.55	75	temperate lowland forest	2	2. temperate lowland forest	NULL
	Polypodiopsida?	19	uncertain	80	uncertain	105	Clavatisporites sp.	67	303	Fern/Moss	2	Camp	1	Braman and Koppelhus, 2005	5	NULL	Dinosaur Park	16	59.4817	-76.5069	59.5952	-78.812	58.6799	-81.7717	50.7595	-111.482	76.35	0.55	75	upland forest	1	1. upland forest	NULL
	Polypodiopsida?	19	uncertain	80	uncertain	105	Concavisporites asper	70	306	Fern/Moss	2	Camp	1	Braman and Koppelhus, 2005	5	NULL	Dinosaur Park	16	59.4817	-76.5069	59.5952	-78.812	58.6799	-81.7717	50.7595	-111.482	76.35	0.55	75	coastal plain	4	4. coastal plain	NULL
	Polypodiopsida?	19	uncertain	80	uncertain	105	Concavisporites orbicornutus	70	308	Fern/Moss	2	Camp	1	Braman and Koppelhus, 2005	5	NULL	Dinosaur Park	16	59.4817	-76.5069	59.5952	-78.812	58.6799	-81.7717	50.7595	-111.482	76.35	0.55	75	coastal plain	4	4. coastal plain	NULL
	Magnoliopsida	13	Santalales?	66	Loranthaceae?	60	Cranwellia rumseyensis	78	326	Angiosperm	1	Camp	1	Braman and Koppelhus, 2005	5	NULL	Dinosaur Park	16	59.4817	-76.5069	59.5952	-78.812	58.6799	-81.7717	50.7595	-111.482	76.35	0.55	75	temperate lowland forest	2	2. temperate lowland forest	NULL
	Magnoliopsida	13	Santalales?	66	Loranthaceae?	60	Cranwellia sp.	78	327	Angiosperm	1	Camp	1	Braman and Koppelhus, 2005	5	NULL	Dinosaur Park	16	59.4817	-76.5069	59.5952	-78.812	58.6799	-81.7717	50.7595	-111.482	76.35	0.55	75	temperate lowland forest	2	2. temperate lowland forest	NULL
	Magnoliopsida	13	Sapindales	67	Sapindaceae	91	Cupanieidites carlquistii	79	330	Angiosperm	1	Camp	1	Braman and Koppelhus, 2005	5	NULL	Dinosaur Park	16	59.4817	-76.5069	59.5952	-78.812	58.6799	-81.7717	50.7595	-111.482	76.35	0.55	75	wet, successional	5	5. wet, successional	NULL
	Polypodiopsida?	19	Cyatheales?	17	Cyatheaceae?	32	Cyathidites australis	82	345	Fern/Moss	2	Camp	1	Braman and Koppelhus, 2005	5	NULL	Dinosaur Park	16	59.4817	-76.5069	59.5952	-78.812	58.6799	-81.7717	50.7595	-111.482	76.35	0.55	75	temperate lowland forest	2	2. temperate lowland forest	NULL
	Polypodiopsida?	19	Cyatheales?	17	Cyatheaceae?	32	Cyathidites minor	82	349	Fern/Moss	2	Camp	1	Braman and Koppelhus, 2005	5	NULL	Dinosaur Park	16	59.4817	-76.5069	59.5952	-78.812	58.6799	-81.7717	50.7595	-111.482	76.35	0.55	75	temperate lowland forest	2	2. temperate lowland forest	NULL
	Polypodiopsida?	19	Cyatheales?	17	Cyatheaceae?	32	Cyathidites sp.	82	351	Fern/Moss	2	Camp	1	Braman and Koppelhus, 2005	5	NULL	Dinosaur Park	16	59.4817	-76.5069	59.5952	-78.812	58.6799	-81.7717	50.7595	-111.482	76.35	0.55	75	temperate lowland forest	2	2. temperate lowland forest	NULL
	Cycadopsida	5	Cycadales?	19	uncertain	105	Cycadopites fragilis	84	358	Gymnosperm	3	Camp	1	Braman and Koppelhus, 2005	5	NULL	Dinosaur Park	16	59.4817	-76.5069	59.5952	-78.812	58.6799	-81.7717	50.7595	-111.482	76.35	0.55	75	tropical lowland forest	6	6. tropical lowland forest	NULL
	Polypodiopsida	18	uncertain	80	uncertain	105	Deltoidospora diaphana	86	365	Fern/Moss	2	Camp	1	Braman and Koppelhus, 2005	5	NULL	Dinosaur Park	16	59.4817	-76.5069	59.5952	-78.812	58.6799	-81.7717	50.7595	-111.482	76.35	0.55	75	temperate lowland forest	2	2. temperate lowland forest	NULL
	Polypodiopsida	18	Schizaeales	71	Schizaeaceae	93	Distaltriangulisporites costatus	91	374	Fern/Moss	2	Camp	1	Braman and Koppelhus, 2005	5	NULL	Dinosaur Park	16	59.4817	-76.5069	59.5952	-78.812	58.6799	-81.7717	50.7595	-111.482	76.35	0.55	75	tropical lowland forest	6	6. tropical lowland forest	NULL
	Polypodiopsida	18	Schizaeales	71	Schizaeaceae	93	Distaltriangulisporites sp.	91	378	Fern/Moss	2	Camp	1	Braman and Koppelhus, 2005	5	NULL	Dinosaur Park	16	59.4817	-76.5069	59.5952	-78.812	58.6799	-81.7717	50.7595	-111.482	76.35	0.55	75	tropical lowland forest	6	6. tropical lowland forest	NULL
	Liliopsida	10	Arecales?	7	Arecaceae	11	Disulcites magnus	92	379	Angiosperm	1	Camp	1	Braman and Koppelhus, 2005	5	NULL	Dinosaur Park	16	59.4817	-76.5069	59.5952	-78.812	58.6799	-81.7717	50.7595	-111.482	76.35	0.55	75	unknown	0	0. unknown	NULL
	Magnoliopsida	13	Caryophyllales	9	Droseraceae	37	Droseridites sp.	93	381	Angiosperm	1	Camp	1	Braman and Koppelhus, 2005	5	NULL	Dinosaur Park	16	59.4817	-76.5069	59.5952	-78.812	58.6799	-81.7717	50.7595	-111.482	76.35	0.55	75	coastal plain	4	4. coastal plain	NULL
	Lycopodiopsida	12	Selaginellales?	74	Selaginellaceae?	96	Echinatisporis solaris	97	386	Fern/Moss	2	Camp	1	Braman and Koppelhus, 2005	5	NULL	Dinosaur Park	16	59.4817	-76.5069	59.5952	-78.812	58.6799	-81.7717	50.7595	-111.482	76.35	0.55	75	estuarine, aquatic	7	7. estuarine, aquatic	NULL
	Lycopodiopsida	12	Selaginellales?	74	Selaginellaceae?	96	Echinatisporis sp.	97	387	Fern/Moss	2	Camp	1	Braman and Koppelhus, 2005	5	NULL	Dinosaur Park	16	59.4817	-76.5069	59.5952	-78.812	58.6799	-81.7717	50.7595	-111.482	76.35	0.55	75	estuarine, aquatic	7	7. estuarine, aquatic	NULL
	Polypodiopsida	18	Equisetales	22	Equisetaceae	39	Equisetosporites amabilis	106	408	Fern/Moss	2	Camp	1	Braman and Koppelhus, 2005	5	NULL	Dinosaur Park	16	59.4817	-76.5069	59.5952	-78.812	58.6799	-81.7717	50.7595	-111.482	76.35	0.55	75	open scrubland	8	8. open scrubland	NULL
	Polypodiopsida	18	Equisetales	22	Equisetaceae	39	Equisetosporites barghoornii	106	409	Fern/Moss	2	Camp	1	Braman and Koppelhus, 2005	5	NULL	Dinosaur Park	16	59.4817	-76.5069	59.5952	-78.812	58.6799	-81.7717	50.7595	-111.482	76.35	0.55	75	open scrubland	8	8. open scrubland	NULL
	Polypodiopsida	18	Equisetales	22	Equisetaceae	39	Equisetosporites multicostatus	106	414	Fern/Moss	2	Camp	1	Braman and Koppelhus, 2005	5	NULL	Dinosaur Park	16	59.4817	-76.5069	59.5952	-78.812	58.6799	-81.7717	50.7595	-111.482	76.35	0.55	75	open scrubland	8	8. open scrubland	NULL
	Polypodiopsida	18	Equisetales	22	Equisetaceae	39	Equisetosporites sp.	106	416	Fern/Moss	2	Camp	1	Braman and Koppelhus, 2005	5	NULL	Dinosaur Park	16	59.4817	-76.5069	59.5952	-78.812	58.6799	-81.7717	50.7595	-111.482	76.35	0.55	75	open scrubland	8	8. open scrubland	NULL
	Magnoliopsida	13	Buxales	8	Buxaceae	20	Erdtmanipollis procumbentiformis	107	423	Angiosperm	1	Camp	1	Braman and Koppelhus, 2005	5	NULL	Dinosaur Park	16	59.4817	-76.5069	59.5952	-78.812	58.6799	-81.7717	50.7595	-111.482	76.35	0.55	75	temperate lowland forest	2	2. temperate lowland forest	NULL
	Cycadopsida	5	Cycadales	18	uncertain	105	Eucommiidites troedssonii	110	434	Gymnosperm	3	Camp	1	Braman and Koppelhus, 2005	5	NULL	Dinosaur Park	16	59.4817	-76.5069	59.5952	-78.812	58.6799	-81.7717	50.7595	-111.482	76.35	0.55	75	coastal plain	4	4. coastal plain	NULL
	Magnoliopsida	13	Santalales	65	Loranthaceae	59	Expressipollis spp.	112	436	Angiosperm	1	Camp	1	Braman and Koppelhus, 2005	5	NULL	Dinosaur Park	16	59.4817	-76.5069	59.5952	-78.812	58.6799	-81.7717	50.7595	-111.482	76.35	0.55	75	coastal plain	4	4. coastal plain	NULL
	Bryopsida?	4	uncertain	80	uncertain	105	Foraminisporis asymmetricus	116	441	Fern/Moss	2	Camp	1	Braman and Koppelhus, 2005	5	NULL	Dinosaur Park	16	59.4817	-76.5069	59.5952	-78.812	58.6799	-81.7717	50.7595	-111.482	76.35	0.55	75	coastal plain	4	4. coastal plain	NULL
	Bryopsida?	4	uncertain	80	uncertain	105	Foraminisporis semiscalaris	116	442	Fern/Moss	2	Camp	1	Braman and Koppelhus, 2005	5	NULL	Dinosaur Park	16	59.4817	-76.5069	59.5952	-78.812	58.6799	-81.7717	50.7595	-111.482	76.35	0.55	75	coastal plain	4	4. coastal plain	NULL
	Bryopsida?	4	uncertain	80	uncertain	105	Foraminisporis undulatus	116	444	Fern/Moss	2	Camp	1	Braman and Koppelhus, 2005	5	NULL	Dinosaur Park	16	59.4817	-76.5069	59.5952	-78.812	58.6799	-81.7717	50.7595	-111.482	76.35	0.55	75	coastal plain	4	4. coastal plain	NULL
	Lycopodiopsida	12	Selaginellales	73	Selaginellaceae	95	Foveosporites cenomanicus	118	450	Fern/Moss	2	Camp	1	Braman and Koppelhus, 2005	5	NULL	Dinosaur Park	16	59.4817	-76.5069	59.5952	-78.812	58.6799	-81.7717	50.7595	-111.482	76.35	0.55	75	temperate lowland forest	2	2. temperate lowland forest	NULL
	Lycopodiopsida	12	Selaginellales	73	Selaginellaceae	95	Foveosporites sawayamaensis	118	452	Fern/Moss	2	Camp	1	Braman and Koppelhus, 2005	5	NULL	Dinosaur Park	16	59.4817	-76.5069	59.5952	-78.812	58.6799	-81.7717	50.7595	-111.482	76.35	0.55	75	temperate lowland forest	2	2. temperate lowland forest	NULL
	Magnoliopsida	13	uncertain	80	uncertain	105	Foveotricolporites rhombohedralis	120	456	Angiosperm	1	Camp	1	Braman and Koppelhus, 2005	5	NULL	Dinosaur Park	16	59.4817	-76.5069	59.5952	-78.812	58.6799	-81.7717	50.7595	-111.482	76.35	0.55	75	estuarine, aquatic	7	7. estuarine, aquatic	NULL
	Lycopodiopsida	12	Lycopodiales?	37	Lycopodiaceae?	62	Foveotriletes parviretis	121	459	Fern/Moss	2	Camp	1	Braman and Koppelhus, 2005	5	NULL	Dinosaur Park	16	59.4817	-76.5069	59.5952	-78.812	58.6799	-81.7717	50.7595	-111.482	76.35	0.55	75	estuarine, aquatic	7	7. estuarine, aquatic	NULL
	Magnoliopsida	13	uncertain	80	uncertain	105	Fraxinoipollenites constrictus	122	463	Angiosperm	1	Camp	1	Braman and Koppelhus, 2005	5	NULL	Dinosaur Park	16	59.4817	-76.5069	59.5952	-78.812	58.6799	-81.7717	50.7595	-111.482	76.35	0.55	75	estuarine, aquatic	7	7. estuarine, aquatic	NULL
	uncertain	23	uncertain	80	uncertain	105	Gabonisporis labyrinthus	123	467	Fern/Moss	2	Camp	1	Braman and Koppelhus, 2005	5	NULL	Dinosaur Park	16	59.4817	-76.5069	59.5952	-78.812	58.6799	-81.7717	50.7595	-111.482	76.35	0.55	75	wet, successional	5	5. wet, successional	NULL
	uncertain	23	uncertain	80	uncertain	105	Ganasterisporites sp.	124	468	Fern/Moss	2	Camp	1	Braman and Koppelhus, 2005	5	NULL	Dinosaur Park	16	59.4817	-76.5069	59.5952	-78.812	58.6799	-81.7717	50.7595	-111.482	76.35	0.55	75	unknown	0	0. unknown	NULL
	Polypodiopsida	18	Gleicheniales	30	Gleicheniaceae	49	Gleicheniidites delicatus	128	481	Fern/Moss	2	Camp	1	Braman and Koppelhus, 2005	5	NULL	Dinosaur Park	16	59.4817	-76.5069	59.5952	-78.812	58.6799	-81.7717	50.7595	-111.482	76.35	0.55	75	swampy, lagoonal	3	3. swampy, lagoonal	NULL
	Polypodiopsida	18	Gleicheniales	30	Gleicheniaceae	49	Gleicheniidites senonicus	128	482	Fern/Moss	2	Camp	1	Braman and Koppelhus, 2005	5	NULL	Dinosaur Park	16	59.4817	-76.5069	59.5952	-78.812	58.6799	-81.7717	50.7595	-111.482	76.35	0.55	75	swampy, lagoonal	3	3. swampy, lagoonal	NULL
	Polypodiopsida	18	Gleicheniales	30	Gleicheniaceae	49	Gleicheniidites sp.	128	483	Fern/Moss	2	Camp	1	Braman and Koppelhus, 2005	5	NULL	Dinosaur Park	16	59.4817	-76.5069	59.5952	-78.812	58.6799	-81.7717	50.7595	-111.482	76.35	0.55	75	swampy, lagoonal	3	3. swampy, lagoonal	NULL
	Polypodiopsida	18	Gleicheniales	30	Gleicheniaceae	49	Gleichenites sp.	129	485	Fern/Moss	2	Camp	1	Braman and Koppelhus, 2005	5	NULL	Dinosaur Park	16	59.4817	-76.5069	59.5952	-78.812	58.6799	-81.7717	50.7595	-111.482	76.35	0.55	75	swampy, lagoonal	3	3. swampy, lagoonal	NULL
	Gnetopsida?	9	Gnetales?	31	Gnetaceae?	50	Gnetaceaepollenites oreadis	130	488	Gymnosperm	3	Camp	1	Braman and Koppelhus, 2005	5	NULL	Dinosaur Park	16	59.4817	-76.5069	59.5952	-78.812	58.6799	-81.7717	50.7595	-111.482	76.35	0.55	75	tropical lowland forest	6	6. tropical lowland forest	NULL
	Gnetopsida?	9	Gnetales?	31	Gnetaceae?	50	Gnetaceaepollenites ventrosus	130	489	Gymnosperm	3	Camp	1	Braman and Koppelhus, 2005	5	NULL	Dinosaur Park	16	59.4817	-76.5069	59.5952	-78.812	58.6799	-81.7717	50.7595	-111.482	76.35	0.55	75	tropical lowland forest	6	6. tropical lowland forest	NULL
	Magnoliopsida	13	Malvales?	43	Malvaceae?	66	Grewipollenites radiatus	132	493	Angiosperm	1	Camp	1	Braman and Koppelhus, 2005	5	NULL	Dinosaur Park	16	59.4817	-76.5069	59.5952	-78.812	58.6799	-81.7717	50.7595	-111.482	76.35	0.55	75	coastal plain	4	4. coastal plain	NULL
	uncertain	23	uncertain	80	uncertain	105	Gunnaripollis superbus	133	494	Angiosperm	1	Camp	1	Braman and Koppelhus, 2005	5	NULL	Dinosaur Park	16	59.4817	-76.5069	59.5952	-78.812	58.6799	-81.7717	50.7595	-111.482	76.35	0.55	75	coastal plain	4	4. coastal plain	NULL
	uncertain	23	uncertain	80	uncertain	105	Hannisporis scollardensis	137	502	Fern/Moss	2	Camp	1	Braman and Koppelhus, 2005	5	NULL	Dinosaur Park	16	59.4817	-76.5069	59.5952	-78.812	58.6799	-81.7717	50.7595	-111.482	76.35	0.55	75	coastal plain	4	4. coastal plain	NULL
	Polypodiopsida?	19	uncertain	80	uncertain	105	Hazaria canadiana	138	504	Fern/Moss	2	Camp	1	Braman and Koppelhus, 2005	5	NULL	Dinosaur Park	16	59.4817	-76.5069	59.5952	-78.812	58.6799	-81.7717	50.7595	-111.482	76.35	0.55	75	unknown	0	0. unknown	NULL
	Polypodiopsida?	19	uncertain	80	uncertain	105	Hazaria sheopiarii	138	506	Fern/Moss	2	Camp	1	Braman and Koppelhus, 2005	5	NULL	Dinosaur Park	16	59.4817	-76.5069	59.5952	-78.812	58.6799	-81.7717	50.7595	-111.482	76.35	0.55	75	unknown	0	0. unknown	NULL
	Lycopodiopsida	12	Selaginellales	73	Selaginellaceae	95	Heliosporites kemensis	140	508	Fern/Moss	2	Camp	1	Braman and Koppelhus, 2005	5	NULL	Dinosaur Park	16	59.4817	-76.5069	59.5952	-78.812	58.6799	-81.7717	50.7595	-111.482	76.35	0.55	75	temperate lowland forest	2	2. temperate lowland forest	NULL
	Magnoliopsida	13	Magnoliales?	39	Annonaceae?	3	Inaperturotetradites scabratus	148	529	Angiosperm	1	Camp	1	Braman and Koppelhus, 2005	5	NULL	Dinosaur Park	16	59.4817	-76.5069	59.5952	-78.812	58.6799	-81.7717	50.7595	-111.482	76.35	0.55	75	temperate lowland forest	2	2. temperate lowland forest	NULL
	uncertain	23	uncertain	80	uncertain	105	Integricorpus bellus	149	530	Angiosperm	1	Camp	1	Braman and Koppelhus, 2005	5	NULL	Dinosaur Park	16	59.4817	-76.5069	59.5952	-78.812	58.6799	-81.7717	50.7595	-111.482	76.35	0.55	75	coastal plain	4	4. coastal plain	NULL
	uncertain	23	uncertain	80	uncertain	105	Integricorpus clarireticulatus	149	531	Angiosperm	1	Camp	1	Braman and Koppelhus, 2005	5	NULL	Dinosaur Park	16	59.4817	-76.5069	59.5952	-78.812	58.6799	-81.7717	50.7595	-111.482	76.35	0.55	75	coastal plain	4	4. coastal plain	NULL
	Bryopsida?	4	uncertain	80	uncertain	105	Interulobites spp.	151	535	Fern/Moss	2	Camp	1	Braman and Koppelhus, 2005	5	NULL	Dinosaur Park	16	59.4817	-76.5069	59.5952	-78.812	58.6799	-81.7717	50.7595	-111.482	76.35	0.55	75	coastal plain	4	4. coastal plain	NULL
	Bryopsida?	4	uncertain	80	uncertain	105	Interulobites symmetricus	151	536	Fern/Moss	2	Camp	1	Braman and Koppelhus, 2005	5	NULL	Dinosaur Park	16	59.4817	-76.5069	59.5952	-78.812	58.6799	-81.7717	50.7595	-111.482	76.35	0.55	75	coastal plain	4	4. coastal plain	NULL
	Polypodiopsida	18	uncertain	80	uncertain	105	Ischyosporites crassimacenius	153	540	Fern/Moss	2	Camp	1	Braman and Koppelhus, 2005	5	NULL	Dinosaur Park	16	59.4817	-76.5069	59.5952	-78.812	58.6799	-81.7717	50.7595	-111.482	76.35	0.55	75	temperate lowland forest	2	2. temperate lowland forest	NULL
	Polypodiopsida	18	uncertain	80	uncertain	105	Ischyosporites sp.	153	541	Fern/Moss	2	Camp	1	Braman and Koppelhus, 2005	5	NULL	Dinosaur Park	16	59.4817	-76.5069	59.5952	-78.812	58.6799	-81.7717	50.7595	-111.482	76.35	0.55	75	temperate lowland forest	2	2. temperate lowland forest	NULL
	Polypodiopsida	18	uncertain	80	uncertain	105	Ischyosporites variegatus	153	542	Fern/Moss	2	Camp	1	Braman and Koppelhus, 2005	5	NULL	Dinosaur Park	16	59.4817	-76.5069	59.5952	-78.812	58.6799	-81.7717	50.7595	-111.482	76.35	0.55	75	temperate lowland forest	2	2. temperate lowland forest	NULL
	Magnoliopsida	13	Fagales	28	uncertain	105	Kurtzipites sp.	156	553	Angiosperm	1	Camp	1	Braman and Koppelhus, 2005	5	NULL	Dinosaur Park	16	59.4817	-76.5069	59.5952	-78.812	58.6799	-81.7717	50.7595	-111.482	76.35	0.55	75	temperate lowland forest	2	2. temperate lowland forest	NULL
	Polypodiopsida	18	Cyatheales	16	Cyatheaceae	31	Kuylisporites scutatus	157	555	Fern/Moss	2	Camp	1	Braman and Koppelhus, 2005	5	NULL	Dinosaur Park	16	59.4817	-76.5069	59.5952	-78.812	58.6799	-81.7717	50.7595	-111.482	76.35	0.55	75	tropical lowland forest	6	6. tropical lowland forest	NULL
	Polypodiopsida	18	uncertain	80	uncertain	105	Laevigatosporites haardti	158	565	Fern/Moss	2	Camp	1	Braman and Koppelhus, 2005	5	NULL	Dinosaur Park	16	59.4817	-76.5069	59.5952	-78.812	58.6799	-81.7717	50.7595	-111.482	76.35	0.55	75	coastal plain	4	4. coastal plain	NULL
	Polypodiopsida	18	uncertain	80	uncertain	105	Laevigatosporites undulatiformis	158	571	Fern/Moss	2	Camp	1	Braman and Koppelhus, 2005	5	NULL	Dinosaur Park	16	59.4817	-76.5069	59.5952	-78.812	58.6799	-81.7717	50.7595	-111.482	76.35	0.55	75	coastal plain	4	4. coastal plain	NULL
	Lycopodiopsida	12	uncertain	80	uncertain	105	Leptolepidites sp.	162	580	Fern/Moss	2	Camp	1	Braman and Koppelhus, 2005	5	NULL	Dinosaur Park	16	59.4817	-76.5069	59.5952	-78.812	58.6799	-81.7717	50.7595	-111.482	76.35	0.55	75	coastal plain	4	4. coastal plain	NULL
	uncertain	23	uncertain	80	uncertain	105	Liburnisporites adnacus	167	586	Angiosperm	1	Camp	1	Braman and Koppelhus, 2005	5	NULL	Dinosaur Park	16	59.4817	-76.5069	59.5952	-78.812	58.6799	-81.7717	50.7595	-111.482	76.35	0.55	75	temperate lowland forest	2	2. temperate lowland forest	NULL
	Liliopsida	10	Liliales	34	uncertain	105	Liliacidites complexus	168	591	Angiosperm	1	Camp	1	Braman and Koppelhus, 2005	5	NULL	Dinosaur Park	16	59.4817	-76.5069	59.5952	-78.812	58.6799	-81.7717	50.7595	-111.482	76.35	0.55	75	temperate lowland forest	2	2. temperate lowland forest	NULL
	Liliopsida	10	Liliales	34	uncertain	105	Liliacidites intermedius	168	594	Angiosperm	1	Camp	1	Braman and Koppelhus, 2005	5	NULL	Dinosaur Park	16	59.4817	-76.5069	59.5952	-78.812	58.6799	-81.7717	50.7595	-111.482	76.35	0.55	75	temperate lowland forest	2	2. temperate lowland forest	NULL
	Liliopsida	10	Liliales	34	uncertain	105	Liliacidites spp.	168	599	Angiosperm	1	Camp	1	Braman and Koppelhus, 2005	5	NULL	Dinosaur Park	16	59.4817	-76.5069	59.5952	-78.812	58.6799	-81.7717	50.7595	-111.482	76.35	0.55	75	temperate lowland forest	2	2. temperate lowland forest	NULL
	Liliopsida	10	Liliales	34	uncertain	105	Liliacidites variegatus	168	600	Angiosperm	1	Camp	1	Braman and Koppelhus, 2005	5	NULL	Dinosaur Park	16	59.4817	-76.5069	59.5952	-78.812	58.6799	-81.7717	50.7595	-111.482	76.35	0.55	75	temperate lowland forest	2	2. temperate lowland forest	NULL
	uncertain	23	uncertain	80	uncertain	105	Lusatisporis dettmannae	172	607	Fern/Moss	2	Camp	1	Braman and Koppelhus, 2005	5	NULL	Dinosaur Park	16	59.4817	-76.5069	59.5952	-78.812	58.6799	-81.7717	50.7595	-111.482	76.35	0.55	75	open scrubland	8	8. open scrubland	NULL
	uncertain	23	uncertain	80	uncertain	105	Lusatisporis sp.	172	608	Fern/Moss	2	Camp	1	Braman and Koppelhus, 2005	5	NULL	Dinosaur Park	16	59.4817	-76.5069	59.5952	-78.812	58.6799	-81.7717	50.7595	-111.482	76.35	0.55	75	open scrubland	8	8. open scrubland	NULL
	Lycopodiopsida	12	Lycopodiales	36	Lycopodiaceae	61	Lycopodiumsporites nitidus	175	619	Fern/Moss	2	Camp	1	Braman and Koppelhus, 2005	5	NULL	Dinosaur Park	16	59.4817	-76.5069	59.5952	-78.812	58.6799	-81.7717	50.7595	-111.482	76.35	0.55	75	upland forest	1	1. upland forest	NULL
	uncertain	23	uncertain	80	uncertain	105	Mancicorpus calvus	180	633	Angiosperm	1	Camp	1	Braman and Koppelhus, 2005	5	NULL	Dinosaur Park	16	59.4817	-76.5069	59.5952	-78.812	58.6799	-81.7717	50.7595	-111.482	76.35	0.55	75	coastal plain	4	4. coastal plain	NULL
	uncertain	23	uncertain	80	uncertain	105	Mancicorpus spp.	180	640	Angiosperm	1	Camp	1	Braman and Koppelhus, 2005	5	NULL	Dinosaur Park	16	59.4817	-76.5069	59.5952	-78.812	58.6799	-81.7717	50.7595	-111.482	76.35	0.55	75	coastal plain	4	4. coastal plain	NULL
	uncertain	23	uncertain	80	uncertain	105	Mancicorpus tenue	180	641	Angiosperm	1	Camp	1	Braman and Koppelhus, 2005	5	NULL	Dinosaur Park	16	59.4817	-76.5069	59.5952	-78.812	58.6799	-81.7717	50.7595	-111.482	76.35	0.55	75	coastal plain	4	4. coastal plain	NULL
	uncertain	23	uncertain	80	uncertain	105	Mancicorpus tripodiformis	180	642	Angiosperm	1	Camp	1	Braman and Koppelhus, 2005	5	NULL	Dinosaur Park	16	59.4817	-76.5069	59.5952	-78.812	58.6799	-81.7717	50.7595	-111.482	76.35	0.55	75	coastal plain	4	4. coastal plain	NULL
	Magnoliopsida	13	Myrtales?	47	Onagraceae?	72	Marcellopites sp.	182	647	Angiosperm	1	Camp	1	Braman and Koppelhus, 2005	5	NULL	Dinosaur Park	16	59.4817	-76.5069	59.5952	-78.812	58.6799	-81.7717	50.7595	-111.482	76.35	0.55	75	coastal plain	4	4. coastal plain	NULL
	Magnoliopsida	13	Myrtales?	47	Onagraceae?	72	Marcellopites tolmanensis	182	648	Angiosperm	1	Camp	1	Braman and Koppelhus, 2005	5	NULL	Dinosaur Park	16	59.4817	-76.5069	59.5952	-78.812	58.6799	-81.7717	50.7595	-111.482	76.35	0.55	75	coastal plain	4	4. coastal plain	NULL
	uncertain	23	uncertain	80	uncertain	105	Monosulcites riparius	194	685	Angiosperm	1	Camp	1	Braman and Koppelhus, 2005	5	NULL	Dinosaur Park	16	59.4817	-76.5069	59.5952	-78.812	58.6799	-81.7717	50.7595	-111.482	76.35	0.55	75	coastal plain	4	4. coastal plain	NULL
	uncertain	23	uncertain	80	uncertain	105	Monosulcites sp.	194	687	Angiosperm	1	Camp	1	Braman and Koppelhus, 2005	5	NULL	Dinosaur Park	16	59.4817	-76.5069	59.5952	-78.812	58.6799	-81.7717	50.7595	-111.482	76.35	0.55	75	coastal plain	4	4. coastal plain	NULL
	Polypodiopsida?	19	uncertain	80	uncertain	105	Multinodisporites praecultus	197	692	Fern/Moss	2	Camp	1	Braman and Koppelhus, 2005	5	NULL	Dinosaur Park	16	59.4817	-76.5069	59.5952	-78.812	58.6799	-81.7717	50.7595	-111.482	76.35	0.55	75	temperate lowland forest	2	2. temperate lowland forest	NULL
	uncertain	23	uncertain	80	uncertain	105	Orbiculapollis globosus	212	715	Angiosperm	1	Camp	1	Braman and Koppelhus, 2005	5	NULL	Dinosaur Park	16	59.4817	-76.5069	59.5952	-78.812	58.6799	-81.7717	50.7595	-111.482	76.35	0.55	75	swampy, lagoonal	3	3. swampy, lagoonal	NULL
	Polypodiopsida	18	Gleicheniales	30	Gleicheniaceae	49	Ornamentifera baculata	213	717	Fern/Moss	2	Camp	1	Braman and Koppelhus, 2005	5	NULL	Dinosaur Park	16	59.4817	-76.5069	59.5952	-78.812	58.6799	-81.7717	50.7595	-111.482	76.35	0.55	75	upland forest	1	1. upland forest	NULL
	Polypodiopsida	18	Osmundales	51	Osmundaceae	74	Osmundacidites wellmanii	215	723	Fern/Moss	2	Camp	1	Braman and Koppelhus, 2005	5	NULL	Dinosaur Park	16	59.4817	-76.5069	59.5952	-78.812	58.6799	-81.7717	50.7595	-111.482	76.35	0.55	75	temperate lowland forest	2	2. temperate lowland forest	NULL
	Magnoliopsida?	14	uncertain	80	uncertain	105	Penetetrapites inconspicuus	226	740	Angiosperm	1	Camp	1	Braman and Koppelhus, 2005	5	NULL	Dinosaur Park	16	59.4817	-76.5069	59.5952	-78.812	58.6799	-81.7717	50.7595	-111.482	76.35	0.55	75	coastal plain	4	4. coastal plain	NULL
	Magnoliopsida?	14	Apiales?	4	Apiaceae?	5	Pentapollenites manifestus	227	742	Angiosperm	1	Camp	1	Braman and Koppelhus, 2005	5	NULL	Dinosaur Park	16	59.4817	-76.5069	59.5952	-78.812	58.6799	-81.7717	50.7595	-111.482	76.35	0.55	75	coastal plain	4	4. coastal plain	NULL
	Magnoliopsida?	14	Apiales?	4	Apiaceae?	5	Pentapollenites normalis	227	743	Angiosperm	1	Camp	1	Braman and Koppelhus, 2005	5	NULL	Dinosaur Park	16	59.4817	-76.5069	59.5952	-78.812	58.6799	-81.7717	50.7595	-111.482	76.35	0.55	75	coastal plain	4	4. coastal plain	NULL
	uncertain	23	uncertain	80	uncertain	105	Petrotrilites spp.	232	750	Fern/Moss	2	Camp	1	Braman and Koppelhus, 2005	5	NULL	Dinosaur Park	16	59.4817	-76.5069	59.5952	-78.812	58.6799	-81.7717	50.7595	-111.482	76.35	0.55	75	unknown	0	0. unknown	NULL
	Magnoliopsida?	14	uncertain	80	uncertain	105	Phimopollenites pseudocheros	234	752	Angiosperm	1	Camp	1	Braman and Koppelhus, 2005	5	NULL	Dinosaur Park	16	59.4817	-76.5069	59.5952	-78.812	58.6799	-81.7717	50.7595	-111.482	76.35	0.55	75	coastal plain	4	4. coastal plain	NULL
	Pinopsida	16	uncertain	80	uncertain	105	Piceites enodis	238	756	Gymnosperm	3	Camp	1	Braman and Koppelhus, 2005	5	NULL	Dinosaur Park	16	59.4817	-76.5069	59.5952	-78.812	58.6799	-81.7717	50.7595	-111.482	76.35	0.55	75	upland forest	1	1. upland forest	NULL
	Polypodiopsida?	19	uncertain	80	uncertain	105	Pilosisporites spp.	239	758	Fern/Moss	2	Camp	1	Braman and Koppelhus, 2005	5	NULL	Dinosaur Park	16	59.4817	-76.5069	59.5952	-78.812	58.6799	-81.7717	50.7595	-111.482	76.35	0.55	75	temperate lowland forest	2	2. temperate lowland forest	NULL
	Ginkgoopsida?	7	uncertain	80	uncertain	105	Pityosporites constrictus	243	769	Gymnosperm	3	Camp	1	Braman and Koppelhus, 2005	5	NULL	Dinosaur Park	16	59.4817	-76.5069	59.5952	-78.812	58.6799	-81.7717	50.7595	-111.482	76.35	0.55	75	coastal plain	4	4. coastal plain	NULL
	Magnoliopsida	13	Apiales?	4	Apiaceae?	5	Pleurospermaepollenites sp.	244	775	Angiosperm	1	Camp	1	Braman and Koppelhus, 2005	5	NULL	Dinosaur Park	16	59.4817	-76.5069	59.5952	-78.812	58.6799	-81.7717	50.7595	-111.482	76.35	0.55	75	upland forest	1	1. upland forest	NULL
	Polypodiopsida	18	Schizaeales	71	uncertain	105	Plicatella erdtmanii	246	778	Fern/Moss	2	Camp	1	Braman and Koppelhus, 2005	5	NULL	Dinosaur Park	16	59.4817	-76.5069	59.5952	-78.812	58.6799	-81.7717	50.7595	-111.482	76.35	0.55	75	tropical lowland forest	6	6. tropical lowland forest	NULL
	Polypodiopsida	18	Schizaeales	71	uncertain	105	Plicatella witzkei	246	779	Fern/Moss	2	Camp	1	Braman and Koppelhus, 2005	5	NULL	Dinosaur Park	16	59.4817	-76.5069	59.5952	-78.812	58.6799	-81.7717	50.7595	-111.482	76.35	0.55	75	tropical lowland forest	6	6. tropical lowland forest	NULL
	Pinopsida	16	Pinales	54	Podocarpaceae	79	Podocarpidites canadensis	248	781	Gymnosperm	3	Camp	1	Braman and Koppelhus, 2005	5	NULL	Dinosaur Park	16	59.4817	-76.5069	59.5952	-78.812	58.6799	-81.7717	50.7595	-111.482	76.35	0.55	75	temperate lowland forest	2	2. temperate lowland forest	NULL
	Pinopsida	16	Pinales	54	Podocarpaceae	79	Podocarpidites dettmannii	248	784	Gymnosperm	3	Camp	1	Braman and Koppelhus, 2005	5	NULL	Dinosaur Park	16	59.4817	-76.5069	59.5952	-78.812	58.6799	-81.7717	50.7595	-111.482	76.35	0.55	75	temperate lowland forest	2	2. temperate lowland forest	NULL
	Pinopsida	16	Pinales	54	Podocarpaceae	79	Podocarpidites potomacensis	248	789	Gymnosperm	3	Camp	1	Braman and Koppelhus, 2005	5	NULL	Dinosaur Park	16	59.4817	-76.5069	59.5952	-78.812	58.6799	-81.7717	50.7595	-111.482	76.35	0.55	75	temperate lowland forest	2	2. temperate lowland forest	NULL
	Bryopsida?	4	uncertain	80	uncertain	105	Polycingulatisporites reduncus	252	805	Fern/Moss	2	Camp	1	Braman and Koppelhus, 2005	5	NULL	Dinosaur Park	16	59.4817	-76.5069	59.5952	-78.812	58.6799	-81.7717	50.7595	-111.482	76.35	0.55	75	coastal plain	4	4. coastal plain	NULL
	Magnoliopsida	13	Caryophyllales?	10	uncertain	105	Polyporina cribraria	257	817	Angiosperm	1	Camp	1	Braman and Koppelhus, 2005	5	NULL	Dinosaur Park	16	59.4817	-76.5069	59.5952	-78.812	58.6799	-81.7717	50.7595	-111.482	76.35	0.55	75	temperate lowland forest	2	2. temperate lowland forest	NULL
	Pinopsida?	17	uncertain	80	uncertain	105	Pristinuspollenites microsaccus	260	820	Gymnosperm	3	Camp	1	Braman and Koppelhus, 2005	5	NULL	Dinosaur Park	16	59.4817	-76.5069	59.5952	-78.812	58.6799	-81.7717	50.7595	-111.482	76.35	0.55	75	coastal plain	4	4. coastal plain	NULL
	Magnoliopsida	13	Proteales	61	uncertain	105	Proteacidites crispus	262	826	Angiosperm	1	Camp	1	Braman and Koppelhus, 2005	5	NULL	Dinosaur Park	16	59.4817	-76.5069	59.5952	-78.812	58.6799	-81.7717	50.7595	-111.482	76.35	0.55	75	unknown	0	0. unknown	NULL
	Magnoliopsida	13	Proteales	61	uncertain	105	Proteacidites occallatus	262	828	Angiosperm	1	Camp	1	Braman and Koppelhus, 2005	5	NULL	Dinosaur Park	16	59.4817	-76.5069	59.5952	-78.812	58.6799	-81.7717	50.7595	-111.482	76.35	0.55	75	unknown	0	0. unknown	NULL
	Magnoliopsida	13	Proteales	61	uncertain	105	Proteacidites pachyseximus	262	829	Angiosperm	1	Camp	1	Braman and Koppelhus, 2005	5	NULL	Dinosaur Park	16	59.4817	-76.5069	59.5952	-78.812	58.6799	-81.7717	50.7595	-111.482	76.35	0.55	75	unknown	0	0. unknown	NULL
	Magnoliopsida	13	Proteales	61	uncertain	105	Proteacidites trilobatus	262	836	Angiosperm	1	Camp	1	Braman and Koppelhus, 2005	5	NULL	Dinosaur Park	16	59.4817	-76.5069	59.5952	-78.812	58.6799	-81.7717	50.7595	-111.482	76.35	0.55	75	unknown	0	0. unknown	NULL
	Magnoliopsida	13	Proteales	61	uncertain	105	Proteacidites tumidiporus	262	837	Angiosperm	1	Camp	1	Braman and Koppelhus, 2005	5	NULL	Dinosaur Park	16	59.4817	-76.5069	59.5952	-78.812	58.6799	-81.7717	50.7595	-111.482	76.35	0.55	75	unknown	0	0. unknown	NULL
	Magnoliopsida	13	Fagales?	29	Fagaceae?	48	Protoquercus agdjakendensis	263	838	Angiosperm	1	Camp	1	Braman and Koppelhus, 2005	5	NULL	Dinosaur Park	16	59.4817	-76.5069	59.5952	-78.812	58.6799	-81.7717	50.7595	-111.482	76.35	0.55	75	temperate lowland forest	2	2. temperate lowland forest	NULL
	Magnoliopsida	13	uncertain	80	uncertain	105	Psilatricolpites hammenii	266	842	Angiosperm	1	Camp	1	Braman and Koppelhus, 2005	5	NULL	Dinosaur Park	16	59.4817	-76.5069	59.5952	-78.812	58.6799	-81.7717	50.7595	-111.482	76.35	0.55	75	coastal plain	4	4. coastal plain	NULL
	Magnoliopsida	13	Ericales	24	Tetrameristaceae	101	Psilatricolporites lusitanicus	267	843	Angiosperm	1	Camp	1	Braman and Koppelhus, 2005	5	NULL	Dinosaur Park	16	59.4817	-76.5069	59.5952	-78.812	58.6799	-81.7717	50.7595	-111.482	76.35	0.55	75	coastal plain	4	4. coastal plain	NULL
	uncertain	23	uncertain	80	uncertain	105	Pulcheripollenites krempii	272	851	Angiosperm	1	Camp	1	Braman and Koppelhus, 2005	5	NULL	Dinosaur Park	16	59.4817	-76.5069	59.5952	-78.812	58.6799	-81.7717	50.7595	-111.482	76.35	0.55	75	swampy, lagoonal	3	3. swampy, lagoonal	NULL
	Liliopsida	10	Poales?	58	Juncaceae?	57	Quadripollis krempii	276	856	Angiosperm	1	Camp	1	Braman and Koppelhus, 2005	5	NULL	Dinosaur Park	16	59.4817	-76.5069	59.5952	-78.812	58.6799	-81.7717	50.7595	-111.482	76.35	0.55	75	tropical lowland forest	6	6. tropical lowland forest	Family assignment from Pocknall et al., 2017
	Liliopsida	10	Poales?	58	Juncaceae?	57	Quadripollis occulta	276	857	Angiosperm	1	Camp	1	Braman and Koppelhus, 2005	5	NULL	Dinosaur Park	16	59.4817	-76.5069	59.5952	-78.812	58.6799	-81.7717	50.7595	-111.482	76.35	0.55	75	tropical lowland forest	6	6. tropical lowland forest	Family assignment from Pocknall et al., 2017
	Magnoliopsida	13	Fagales	28	Fagaceae	47	Quercoidites spp.	277	860	Angiosperm	1	Camp	1	Braman and Koppelhus, 2005	5	NULL	Dinosaur Park	16	59.4817	-76.5069	59.5952	-78.812	58.6799	-81.7717	50.7595	-111.482	76.35	0.55	75	temperate lowland forest	2	2. temperate lowland forest	NULL
	Polypodiopsida?	19	uncertain	80	uncertain	105	Radialisporis radiatus	281	865	Fern/Moss	2	Camp	1	Braman and Koppelhus, 2005	5	NULL	Dinosaur Park	16	59.4817	-76.5069	59.5952	-78.812	58.6799	-81.7717	50.7595	-111.482	76.35	0.55	75	unknown	0	0. unknown	NULL
	Lycopodiopsida	12	uncertain	80	uncertain	105	Raistrickia sp.	282	867	Fern/Moss	2	Camp	1	Braman and Koppelhus, 2005	5	NULL	Dinosaur Park	16	59.4817	-76.5069	59.5952	-78.812	58.6799	-81.7717	50.7595	-111.482	76.35	0.55	75	coastal plain	4	4. coastal plain	NULL
	Lycopodiopsida	12	uncertain	80	uncertain	105	Reticulisporites elongatus	286	872	Fern/Moss	2	Camp	1	Braman and Koppelhus, 2005	5	NULL	Dinosaur Park	16	59.4817	-76.5069	59.5952	-78.812	58.6799	-81.7717	50.7595	-111.482	76.35	0.55	75	upland forest	1	1. upland forest	NULL
	Polypodiopsida	18	Schizaeales	71	Schizaeaceae	93	Reticulosporis foveolatus	288	877	Fern/Moss	2	Camp	1	Braman and Koppelhus, 2005	5	NULL	Dinosaur Park	16	59.4817	-76.5069	59.5952	-78.812	58.6799	-81.7717	50.7595	-111.482	76.35	0.55	75	coastal plain	4	4. coastal plain	NULL
	Polypodiopsida	18	Schizaeales	71	Schizaeaceae	93	Reticulosporis reticulatus	288	878	Fern/Moss	2	Camp	1	Braman and Koppelhus, 2005	5	NULL	Dinosaur Park	16	59.4817	-76.5069	59.5952	-78.812	58.6799	-81.7717	50.7595	-111.482	76.35	0.55	75	coastal plain	4	4. coastal plain	NULL
	Magnoliopsida	13	Magnoliales?	39	uncertain	105	Retitricolpites salardae	290	883	Angiosperm	1	Camp	1	Braman and Koppelhus, 2005	5	NULL	Dinosaur Park	16	59.4817	-76.5069	59.5952	-78.812	58.6799	-81.7717	50.7595	-111.482	76.35	0.55	75	coastal plain	4	4. coastal plain	NULL
	Lycopodiopsida	12	Lycopodiales	36	Lycopodiaceae	61	Retitriletes austroclavatides	291	887	Fern/Moss	2	Camp	1	Braman and Koppelhus, 2005	5	NULL	Dinosaur Park	16	59.4817	-76.5069	59.5952	-78.812	58.6799	-81.7717	50.7595	-111.482	76.35	0.55	75	upland forest	1	1. upland forest	NULL
	Lycopodiopsida	12	Lycopodiales	36	Lycopodiaceae	61	Retitriletes globusus	291	890	Fern/Moss	2	Camp	1	Braman and Koppelhus, 2005	5	NULL	Dinosaur Park	16	59.4817	-76.5069	59.5952	-78.812	58.6799	-81.7717	50.7595	-111.482	76.35	0.55	75	upland forest	1	1. upland forest	NULL
	Lycopodiopsida	12	Lycopodiales	36	Lycopodiaceae	61	Retitriletes mediocris	291	892	Fern/Moss	2	Camp	1	Braman and Koppelhus, 2005	5	NULL	Dinosaur Park	16	59.4817	-76.5069	59.5952	-78.812	58.6799	-81.7717	50.7595	-111.482	76.35	0.55	75	upland forest	1	1. upland forest	NULL
	Bryopsida	3	uncertain	80	uncertain	105	Rogalskaisporites sp.	293	907	Fern/Moss	2	Camp	1	Braman and Koppelhus, 2005	5	NULL	Dinosaur Park	16	59.4817	-76.5069	59.5952	-78.812	58.6799	-81.7717	50.7595	-111.482	76.35	0.55	75	temperate lowland forest	2	2. temperate lowland forest	NULL
	Magnoliopsida	13	Piperales	56	Aristolochiaceae	13	Rosannia manika	294	908	Angiosperm	1	Camp	1	Braman and Koppelhus, 2005	5	NULL	Dinosaur Park	16	59.4817	-76.5069	59.5952	-78.812	58.6799	-81.7717	50.7595	-111.482	76.35	0.55	75	upland forest	1	1. upland forest	NULL
	Magnoliopsida	13	uncertain	80	uncertain	105	Rousea sp.	295	909	Angiosperm	1	Camp	1	Braman and Koppelhus, 2005	5	NULL	Dinosaur Park	16	59.4817	-76.5069	59.5952	-78.812	58.6799	-81.7717	50.7595	-111.482	76.35	0.55	75	tropical lowland forest	6	6. tropical lowland forest	NULL
	Polypodiopsida	18	Schizaeales	71	uncertain	105	Ruffordiaspora australiensis	296	912	Fern/Moss	2	Camp	1	Braman and Koppelhus, 2005	5	NULL	Dinosaur Park	16	59.4817	-76.5069	59.5952	-78.812	58.6799	-81.7717	50.7595	-111.482	76.35	0.55	75	tropical lowland forest	6	6. tropical lowland forest	NULL
	Polypodiopsida	18	Osmundales	51	Osmundaceae	74	Rugulatisporites sp.	298	916	Fern/Moss	2	Camp	1	Braman and Koppelhus, 2005	5	NULL	Dinosaur Park	16	59.4817	-76.5069	59.5952	-78.812	58.6799	-81.7717	50.7595	-111.482	76.35	0.55	75	temperate lowland forest	2	2. temperate lowland forest	NULL
	Magnoliopsida	13	Santalales?	66	Santalaceae?	90	Santalacites spp.	303	925	Angiosperm	1	Camp	1	Braman and Koppelhus, 2005	5	NULL	Dinosaur Park	16	59.4817	-76.5069	59.5952	-78.812	58.6799	-81.7717	50.7595	-111.482	76.35	0.55	75	coastal plain	4	4. coastal plain	NULL
	uncertain	23	uncertain	80	uncertain	105	Satishia spp.	305	928	Angiosperm	1	Camp	1	Braman and Koppelhus, 2005	5	NULL	Dinosaur Park	16	59.4817	-76.5069	59.5952	-78.812	58.6799	-81.7717	50.7595	-111.482	76.35	0.55	75	unknown	0	0. unknown	NULL
	Magnoliopsida	13	uncertain	80	uncertain	105	Scabrastephanocolpites lepidus	306	930	Angiosperm	1	Camp	1	Braman and Koppelhus, 2005	5	NULL	Dinosaur Park	16	59.4817	-76.5069	59.5952	-78.812	58.6799	-81.7717	50.7595	-111.482	76.35	0.55	75	coastal plain	4	4. coastal plain	NULL
	Magnoliopsida	13	uncertain	80	uncertain	105	Scabrastephanocolpites pentaaperturites	306	931	Angiosperm	1	Camp	1	Braman and Koppelhus, 2005	5	NULL	Dinosaur Park	16	59.4817	-76.5069	59.5952	-78.812	58.6799	-81.7717	50.7595	-111.482	76.35	0.55	75	coastal plain	4	4. coastal plain	NULL
	Magnoliopsida	13	uncertain	80	uncertain	105	Scabrastephanocolpites spp.	306	932	Angiosperm	1	Camp	1	Braman and Koppelhus, 2005	5	NULL	Dinosaur Park	16	59.4817	-76.5069	59.5952	-78.812	58.6799	-81.7717	50.7595	-111.482	76.35	0.55	75	coastal plain	4	4. coastal plain	NULL
	Polypodiopsida	18	uncertain	80	uncertain	105	Seductisporites eminens	309	942	Fern/Moss	2	Camp	1	Braman and Koppelhus, 2005	5	NULL	Dinosaur Park	16	59.4817	-76.5069	59.5952	-78.812	58.6799	-81.7717	50.7595	-111.482	76.35	0.55	75	coastal plain	4	4. coastal plain	NULL
	Magnoliopsida	13	uncertain	80	uncertain	105	Senipites drumhellerensis	311	945	Angiosperm	1	Camp	1	Braman and Koppelhus, 2005	5	NULL	Dinosaur Park	16	59.4817	-76.5069	59.5952	-78.812	58.6799	-81.7717	50.7595	-111.482	76.35	0.55	75	coastal plain	4	4. coastal plain	NULL
	Pinopsida	16	Pinales	54	Cupressaceae	29	Sequoiapollenites paleocenicus	312	946	Gymnosperm	3	Camp	1	Braman and Koppelhus, 2005	5	NULL	Dinosaur Park	16	59.4817	-76.5069	59.5952	-78.812	58.6799	-81.7717	50.7595	-111.482	76.35	0.55	75	temperate lowland forest	2	2. temperate lowland forest	NULL
	Lycopodiopsida	12	Lycopodiales	36	Lycopodiaceae	61	Sestrosporites pseudoalveolatus	313	951	Fern/Moss	2	Camp	1	Braman and Koppelhus, 2005	5	NULL	Dinosaur Park	16	59.4817	-76.5069	59.5952	-78.812	58.6799	-81.7717	50.7595	-111.482	76.35	0.55	75	upland forest	1	1. upland forest	NULL
	uncertain	23	uncertain	80	uncertain	105	Siberiapollis montanensis	314	952	Angiosperm	1	Camp	1	Braman and Koppelhus, 2005	5	NULL	Dinosaur Park	16	59.4817	-76.5069	59.5952	-78.812	58.6799	-81.7717	50.7595	-111.482	76.35	0.55	75	coastal plain	4	4. coastal plain	NULL
	uncertain	23	uncertain	80	uncertain	105	Siberiapollis spp.	314	954	Angiosperm	1	Camp	1	Braman and Koppelhus, 2005	5	NULL	Dinosaur Park	16	59.4817	-76.5069	59.5952	-78.812	58.6799	-81.7717	50.7595	-111.482	76.35	0.55	75	coastal plain	4	4. coastal plain	NULL
	Magnoliopsida	13	Fabales?	27	Fabaceae?	46	Sindorapollis granulatus	317	957	Angiosperm	1	Camp	1	Braman and Koppelhus, 2005	5	NULL	Dinosaur Park	16	59.4817	-76.5069	59.5952	-78.812	58.6799	-81.7717	50.7595	-111.482	76.35	0.55	75	coastal plain	4	4. coastal plain	NULL
	Liliopsida	10	Poales?	58	Sparganiaceae	97	Sparganiaceaepollenites sp.	319	959	Angiosperm	1	Camp	1	Braman and Koppelhus, 2005	5	NULL	Dinosaur Park	16	59.4817	-76.5069	59.5952	-78.812	58.6799	-81.7717	50.7595	-111.482	76.35	0.55	75	swampy, lagoonal	3	3. swampy, lagoonal	NULL
	Polypodiopsida	18	uncertain	80	uncertain	105	Stenozonotriletes dedaleorimosus	326	981	Fern/Moss	2	Camp	1	Braman and Koppelhus, 2005	5	NULL	Dinosaur Park	16	59.4817	-76.5069	59.5952	-78.812	58.6799	-81.7717	50.7595	-111.482	76.35	0.55	75	estuarine, aquatic	7	7. estuarine, aquatic	NULL
	Polypodiopsida	18	uncertain	80	uncertain	105	Stenozonotriletes divulgatus	326	982	Fern/Moss	2	Camp	1	Braman and Koppelhus, 2005	5	NULL	Dinosaur Park	16	59.4817	-76.5069	59.5952	-78.812	58.6799	-81.7717	50.7595	-111.482	76.35	0.55	75	estuarine, aquatic	7	7. estuarine, aquatic	NULL
	Polypodiopsida?	19	uncertain	80	uncertain	105	Stereigranisporis regius	328	985	Fern/Moss	2	Camp	1	Braman and Koppelhus, 2005	5	NULL	Dinosaur Park	16	59.4817	-76.5069	59.5952	-78.812	58.6799	-81.7717	50.7595	-111.482	76.35	0.55	75	coastal plain	4	4. coastal plain	NULL
	Bryopsida	3	uncertain	80	uncertain	105	Stereisporites antiquasporites	329	987	Fern/Moss	2	Camp	1	Braman and Koppelhus, 2005	5	NULL	Dinosaur Park	16	59.4817	-76.5069	59.5952	-78.812	58.6799	-81.7717	50.7595	-111.482	76.35	0.55	75	coastal plain	4	4. coastal plain	NULL
	Bryopsida	3	uncertain	80	uncertain	105	Stereisporites cingulatus	329	989	Fern/Moss	2	Camp	1	Braman and Koppelhus, 2005	5	NULL	Dinosaur Park	16	59.4817	-76.5069	59.5952	-78.812	58.6799	-81.7717	50.7595	-111.482	76.35	0.55	75	coastal plain	4	4. coastal plain	NULL
	Bryopsida	3	uncertain	80	uncertain	105	Stereisporites rodaensis	329	991	Fern/Moss	2	Camp	1	Braman and Koppelhus, 2005	5	NULL	Dinosaur Park	16	59.4817	-76.5069	59.5952	-78.812	58.6799	-81.7717	50.7595	-111.482	76.35	0.55	75	coastal plain	4	4. coastal plain	NULL
	Bryopsida	3	uncertain	80	uncertain	105	Stoverisporites lunaris	331	996	Fern/Moss	2	Camp	1	Braman and Koppelhus, 2005	5	NULL	Dinosaur Park	16	59.4817	-76.5069	59.5952	-78.812	58.6799	-81.7717	50.7595	-111.482	76.35	0.55	75	coastal plain	4	4. coastal plain	NULL
	Magnoliopsida	13	Buxales	8	Buxaceae	20	Striatopollis sp.	333	999	Angiosperm	1	Camp	1	Braman and Koppelhus, 2005	5	NULL	Dinosaur Park	16	59.4817	-76.5069	59.5952	-78.812	58.6799	-81.7717	50.7595	-111.482	76.35	0.55	75	temperate lowland forest	2	2. temperate lowland forest	NULL
	Magnoliopsida	13	Fagales	28	Juglandaceae	55	Subtriporopollenites alpinus	336	1004	Angiosperm	1	Camp	1	Braman and Koppelhus, 2005	5	NULL	Dinosaur Park	16	59.4817	-76.5069	59.5952	-78.812	58.6799	-81.7717	50.7595	-111.482	76.35	0.55	75	temperate lowland forest	2	2. temperate lowland forest	NULL
	Magnoliopsida	13	Santalales	65	Loranthaceae	59	Syncolporites spp.	338	1009	Angiosperm	1	Camp	1	Braman and Koppelhus, 2005	5	NULL	Dinosaur Park	16	59.4817	-76.5069	59.5952	-78.812	58.6799	-81.7717	50.7595	-111.482	76.35	0.55	75	tropical lowland forest	6	6. tropical lowland forest	NULL
	Pinopsida	16	Pinales	54	Cupressaceae?	30	Taxodiaceaepollenites hiatus	343	1015	Gymnosperm	3	Camp	1	Braman and Koppelhus, 2005	5	NULL	Dinosaur Park	16	59.4817	-76.5069	59.5952	-78.812	58.6799	-81.7717	50.7595	-111.482	76.35	0.55	75	temperate lowland forest	2	2. temperate lowland forest	NULL
	Pinopsida	16	Pinales	54	Cupressaceae?	30	Taxodiaceaepollenites vacuipites	343	1018	Gymnosperm	3	Camp	1	Braman and Koppelhus, 2005	5	NULL	Dinosaur Park	16	59.4817	-76.5069	59.5952	-78.812	58.6799	-81.7717	50.7595	-111.482	76.35	0.55	75	temperate lowland forest	2	2. temperate lowland forest	NULL
	uncertain	23	uncertain	80	uncertain	105	Tetracolpites pulcher	344	1019	Angiosperm	1	Camp	1	Braman and Koppelhus, 2005	5	NULL	Dinosaur Park	16	59.4817	-76.5069	59.5952	-78.812	58.6799	-81.7717	50.7595	-111.482	76.35	0.55	75	open scrubland	8	8. open scrubland	NULL
	Polypodiopsida	18	Osmundales?	52	Osmundaceae?	75	Todisporites cf. dubius	352	1031	Fern/Moss	2	Camp	1	Braman and Koppelhus, 2005	5	NULL	Dinosaur Park	16	59.4817	-76.5069	59.5952	-78.812	58.6799	-81.7717	50.7595	-111.482	76.35	0.55	75	temperate lowland forest	2	2. temperate lowland forest	NULL
	Polypodiopsida	18	Osmundales?	52	Osmundaceae?	75	Todisporites major	352	1032	Fern/Moss	2	Camp	1	Braman and Koppelhus, 2005	5	NULL	Dinosaur Park	16	59.4817	-76.5069	59.5952	-78.812	58.6799	-81.7717	50.7595	-111.482	76.35	0.55	75	temperate lowland forest	2	2. temperate lowland forest	NULL
	Polypodiopsida	18	Osmundales?	52	Osmundaceae?	75	Todisporites scabratus	352	1034	Fern/Moss	2	Camp	1	Braman and Koppelhus, 2005	5	NULL	Dinosaur Park	16	59.4817	-76.5069	59.5952	-78.812	58.6799	-81.7717	50.7595	-111.482	76.35	0.55	75	temperate lowland forest	2	2. temperate lowland forest	NULL
	Magnoliopsida	13	uncertain	80	uncertain	105	Translucentipollis plicatilis	355	1038	Angiosperm	1	Camp	1	Braman and Koppelhus, 2005	5	NULL	Dinosaur Park	16	59.4817	-76.5069	59.5952	-78.812	58.6799	-81.7717	50.7595	-111.482	76.35	0.55	75	swampy, lagoonal	3	3. swampy, lagoonal	NULL
	Magnoliopsida	13	uncertain	80	uncertain	105	Translucentipollis sp.	355	1039	Angiosperm	1	Camp	1	Braman and Koppelhus, 2005	5	NULL	Dinosaur Park	16	59.4817	-76.5069	59.5952	-78.812	58.6799	-81.7717	50.7595	-111.482	76.35	0.55	75	swampy, lagoonal	3	3. swampy, lagoonal	NULL
	Magnoliopsida	13	Magnoliales?	39	uncertain	105	Tricolpites antipodica	358	1052	Angiosperm	1	Camp	1	Braman and Koppelhus, 2005	5	NULL	Dinosaur Park	16	59.4817	-76.5069	59.5952	-78.812	58.6799	-81.7717	50.7595	-111.482	76.35	0.55	75	coastal plain	4	4. coastal plain	NULL
	Magnoliopsida	13	Magnoliales?	39	uncertain	105	Tricolpites concinnatus	358	1057	Angiosperm	1	Camp	1	Braman and Koppelhus, 2005	5	NULL	Dinosaur Park	16	59.4817	-76.5069	59.5952	-78.812	58.6799	-81.7717	50.7595	-111.482	76.35	0.55	75	coastal plain	4	4. coastal plain	NULL
	Magnoliopsida	13	Magnoliales?	39	uncertain	105	Tricolpites hians	358	1060	Angiosperm	1	Camp	1	Braman and Koppelhus, 2005	5	NULL	Dinosaur Park	16	59.4817	-76.5069	59.5952	-78.812	58.6799	-81.7717	50.7595	-111.482	76.35	0.55	75	coastal plain	4	4. coastal plain	NULL
	Magnoliopsida	13	Magnoliales?	39	uncertain	105	Tricolpites pulcher	358	1074	Angiosperm	1	Camp	1	Braman and Koppelhus, 2005	5	NULL	Dinosaur Park	16	59.4817	-76.5069	59.5952	-78.812	58.6799	-81.7717	50.7595	-111.482	76.35	0.55	75	coastal plain	4	4. coastal plain	NULL
	Magnoliopsida	13	Magnoliales?	39	uncertain	105	Tricolpites reticulatus	358	1076	Angiosperm	1	Camp	1	Braman and Koppelhus, 2005	5	NULL	Dinosaur Park	16	59.4817	-76.5069	59.5952	-78.812	58.6799	-81.7717	50.7595	-111.482	76.35	0.55	75	coastal plain	4	4. coastal plain	NULL
	Magnoliopsida	13	Magnoliales?	39	uncertain	105	Tricolpites ringens	358	1077	Angiosperm	1	Camp	1	Braman and Koppelhus, 2005	5	NULL	Dinosaur Park	16	59.4817	-76.5069	59.5952	-78.812	58.6799	-81.7717	50.7595	-111.482	76.35	0.55	75	coastal plain	4	4. coastal plain	NULL
	Magnoliopsida	13	Magnoliales?	39	uncertain	105	Tricolpites spp.	358	1079	Angiosperm	1	Camp	1	Braman and Koppelhus, 2005	5	NULL	Dinosaur Park	16	59.4817	-76.5069	59.5952	-78.812	58.6799	-81.7717	50.7595	-111.482	76.35	0.55	75	coastal plain	4	4. coastal plain	NULL
	uncertain	23	uncertain	80	uncertain	105	Tricolpopollenites levitas	359	1086	Angiosperm	1	Camp	1	Braman and Koppelhus, 2005	5	NULL	Dinosaur Park	16	59.4817	-76.5069	59.5952	-78.812	58.6799	-81.7717	50.7595	-111.482	76.35	0.55	75	coastal plain	4	4. coastal plain	NULL
	uncertain	23	uncertain	80	uncertain	105	Tricolpopollenites spp.	359	1093	Angiosperm	1	Camp	1	Braman and Koppelhus, 2005	5	NULL	Dinosaur Park	16	59.4817	-76.5069	59.5952	-78.812	58.6799	-81.7717	50.7595	-111.482	76.35	0.55	75	coastal plain	4	4. coastal plain	NULL
	Magnoliopsida	13	Magnoliales?	39	uncertain	105	Tricolporites sp.	361	1101	Angiosperm	1	Camp	1	Braman and Koppelhus, 2005	5	NULL	Dinosaur Park	16	59.4817	-76.5069	59.5952	-78.812	58.6799	-81.7717	50.7595	-111.482	76.35	0.55	75	temperate lowland forest	2	2. temperate lowland forest	NULL
	uncertain	13	uncertain	80	uncertain	105	Trifossapollenites ellipticus	363	1115	Gymnosperm	3	Camp	1	Braman and Koppelhus, 2005	5	NULL	Dinosaur Park	16	59.4817	-76.5069	59.5952	-78.812	58.6799	-81.7717	50.7595	-111.482	76.35	0.55	75	coastal plain	4	4. coastal plain	NULL
	Polypodiopsida	18	uncertain	80	uncertain	105	Trilites bettianus	365	1117	Fern/Moss	2	Camp	1	Braman and Koppelhus, 2005	5	NULL	Dinosaur Park	16	59.4817	-76.5069	59.5952	-78.812	58.6799	-81.7717	50.7595	-111.482	76.35	0.55	75	temperate lowland forest	2	2. temperate lowland forest	NULL
	Magnoliopsida	13	Myrtales?	47	Lythraceae?	64	Trilobapollis laudabilis	366	1118	Angiosperm	1	Camp	1	Braman and Koppelhus, 2005	5	NULL	Dinosaur Park	16	59.4817	-76.5069	59.5952	-78.812	58.6799	-81.7717	50.7595	-111.482	76.35	0.55	75	coastal plain	4	4. coastal plain	NULL
	Bryopsida	3	uncertain	80	uncertain	105	Triporoletes cf. asper	369	1124	Fern/Moss	2	Camp	1	Braman and Koppelhus, 2005	5	NULL	Dinosaur Park	16	59.4817	-76.5069	59.5952	-78.812	58.6799	-81.7717	50.7595	-111.482	76.35	0.55	75	temperate lowland forest	2	2. temperate lowland forest	NULL
	Bryopsida	3	uncertain	80	uncertain	105	Triporoletes stellatus	369	1129	Fern/Moss	2	Camp	1	Braman and Koppelhus, 2005	5	NULL	Dinosaur Park	16	59.4817	-76.5069	59.5952	-78.812	58.6799	-81.7717	50.7595	-111.482	76.35	0.55	75	temperate lowland forest	2	2. temperate lowland forest	NULL
	Magnoliopsida	13	Proteales	61	Proteaceae	84	Triporopollenites spp.	370	1140	Angiosperm	1	Camp	1	Braman and Koppelhus, 2005	5	NULL	Dinosaur Park	16	59.4817	-76.5069	59.5952	-78.812	58.6799	-81.7717	50.7595	-111.482	76.35	0.55	75	coastal plain	4	4. coastal plain	NULL
	Polypodiopsida	18	uncertain	80	uncertain	105	Triquitrites absurdus	371	1142	Fern/Moss	2	Camp	1	Braman and Koppelhus, 2005	5	NULL	Dinosaur Park	16	59.4817	-76.5069	59.5952	-78.812	58.6799	-81.7717	50.7595	-111.482	76.35	0.55	75	temperate lowland forest	2	2. temperate lowland forest	NULL
	Marchantiopsida	15	Marchantiales	45	Ricciaceae	86	Trochicola scollardiana	374	1147	Fern/Moss	2	Camp	1	Braman and Koppelhus, 2005	5	NULL	Dinosaur Park	16	59.4817	-76.5069	59.5952	-78.812	58.6799	-81.7717	50.7595	-111.482	76.35	0.55	75	unknown	0	0. unknown	NULL
	Magnoliopsida	13	Fagales	28	Juglandaceae	55	Trudopollis meekeri	375	1148	Angiosperm	1	Camp	1	Braman and Koppelhus, 2005	5	NULL	Dinosaur Park	16	59.4817	-76.5069	59.5952	-78.812	58.6799	-81.7717	50.7595	-111.482	76.35	0.55	75	temperate lowland forest	2	2. temperate lowland forest	NULL
	Magnoliopsida	13	Fagales	28	Juglandaceae	55	Trudopollis variabilis	375	1150	Angiosperm	1	Camp	1	Braman and Koppelhus, 2005	5	NULL	Dinosaur Park	16	59.4817	-76.5069	59.5952	-78.812	58.6799	-81.7717	50.7595	-111.482	76.35	0.55	75	temperate lowland forest	2	2. temperate lowland forest	NULL
	Magnoliopsida	13	Proteales?	62	uncertain	105	Tschudypollis thalmanni	376	1153	Angiosperm	1	Camp	1	Braman and Koppelhus, 2005	5	NULL	Dinosaur Park	16	59.4817	-76.5069	59.5952	-78.812	58.6799	-81.7717	50.7595	-111.482	76.35	0.55	75	coastal plain	4	4. coastal plain	NULL
	Polypodiopsida?	19	uncertain	80	uncertain	105	Umbosporites callosus	382	1167	Fern/Moss	2	Camp	1	Braman and Koppelhus, 2005	5	NULL	Dinosaur Park	16	59.4817	-76.5069	59.5952	-78.812	58.6799	-81.7717	50.7595	-111.482	76.35	0.55	75	coastal plain	4	4. coastal plain	NULL
	Polypodiopsida	18	Schizaeales	71	Schizaeaceae	93	Undulatisporites fossulatus	383	1168	Fern/Moss	2	Camp	1	Braman and Koppelhus, 2005	5	NULL	Dinosaur Park	16	59.4817	-76.5069	59.5952	-78.812	58.6799	-81.7717	50.7595	-111.482	76.35	0.55	75	tropical lowland forest	6	6. tropical lowland forest	NULL
	Polypodiopsida	18	Schizaeales	71	Lygodiaceae	63	Varirugosisporites tolmanensis	384	1171	Fern/Moss	2	Camp	1	Braman and Koppelhus, 2005	5	NULL	Dinosaur Park	16	59.4817	-76.5069	59.5952	-78.812	58.6799	-81.7717	50.7595	-111.482	76.35	0.55	75	tropical lowland forest	6	6. tropical lowland forest	NULL
	Polypodiopsida	18	Polypodiales	59	Polypodiaceae	81	Verrucatosporites sp.	385	1174	Fern/Moss	2	Camp	1	Braman and Koppelhus, 2005	5	NULL	Dinosaur Park	16	59.4817	-76.5069	59.5952	-78.812	58.6799	-81.7717	50.7595	-111.482	76.35	0.55	75	tropical lowland forest	6	6. tropical lowland forest	NULL
	Polypodiopsida	18	Polypodiales	59	Polypodiaceae	81	Verrucatosporites spp.	385	1175	Fern/Moss	2	Camp	1	Braman and Koppelhus, 2005	5	NULL	Dinosaur Park	16	59.4817	-76.5069	59.5952	-78.812	58.6799	-81.7717	50.7595	-111.482	76.35	0.55	75	tropical lowland forest	6	6. tropical lowland forest	NULL
	Magnoliopsida	13	uncertain	80	uncertain	105	Verrutricolpites spp.	387	1179	Angiosperm	1	Camp	1	Braman and Koppelhus, 2005	5	NULL	Dinosaur Park	16	59.4817	-76.5069	59.5952	-78.812	58.6799	-81.7717	50.7595	-111.482	76.35	0.55	75	temperate lowland forest	2	2. temperate lowland forest	NULL
	Magnoliopsida	13	Myrtales?	47	Lythraceae?	64	Verrutricolporites spp.	388	1180	Angiosperm	1	Camp	1	Braman and Koppelhus, 2005	5	NULL	Dinosaur Park	16	59.4817	-76.5069	59.5952	-78.812	58.6799	-81.7717	50.7595	-111.482	76.35	0.55	75	temperate lowland forest	2	2. temperate lowland forest	NULL
	uncertain	23	uncertain	80	uncertain	105	Verrutriporites spp.	389	1181	Angiosperm	1	Camp	1	Braman and Koppelhus, 2005	5	NULL	Dinosaur Park	16	59.4817	-76.5069	59.5952	-78.812	58.6799	-81.7717	50.7595	-111.482	76.35	0.55	75	temperate lowland forest	2	2. temperate lowland forest	NULL
	uncertain	23	uncertain	80	uncertain	105	Virgo amiantopollis	390	1182	Angiosperm	1	Camp	1	Braman and Koppelhus, 2005	5	NULL	Dinosaur Park	16	59.4817	-76.5069	59.5952	-78.812	58.6799	-81.7717	50.7595	-111.482	76.35	0.55	75	unknown	0	0. unknown	NULL
	Pteridospermatopsida?	21	Caytoniales?	11	Caytoniaceae?	22	Vitreisporites pallidus	393	1186	Gymnosperm	3	Camp	1	Braman and Koppelhus, 2005	5	NULL	Dinosaur Park	16	59.4817	-76.5069	59.5952	-78.812	58.6799	-81.7717	50.7595	-111.482	76.35	0.55	75	temperate lowland forest	2	2. temperate lowland forest	NULL
	Liliopsida?	11	Arecales?	7	Arecaceae?	12	Weylandipollis sp.	394	1188	Angiosperm	1	Camp	1	Braman and Koppelhus, 2005	5	NULL	Dinosaur Park	16	59.4817	-76.5069	59.5952	-78.812	58.6799	-81.7717	50.7595	-111.482	76.35	0.55	75	coastal plain	4	4. coastal plain	NULL
	Marchantiopsida	15	uncertain	80	uncertain	105	Zlivisporis blanensis	397	1198	Fern/Moss	2	Camp	1	Braman and Koppelhus, 2005	5	NULL	Dinosaur Park	16	59.4817	-76.5069	59.5952	-78.812	58.6799	-81.7717	50.7595	-111.482	76.35	0.55	75	swampy, lagoonal	3	3. swampy, lagoonal	NULL
	Marchantiopsida	15	uncertain	80	uncertain	105	Zlivisporis cenomanianus	397	1199	Fern/Moss	2	Camp	1	Braman and Koppelhus, 2005	5	NULL	Dinosaur Park	16	59.4817	-76.5069	59.5952	-78.812	58.6799	-81.7717	50.7595	-111.482	76.35	0.55	75	swampy, lagoonal	3	3. swampy, lagoonal	NULL
	Marchantiopsida	15	uncertain	80	uncertain	105	Zlivisporis reticulatus	397	1201	Fern/Moss	2	Camp	1	Braman and Koppelhus, 2005	5	NULL	Dinosaur Park	16	59.4817	-76.5069	59.5952	-78.812	58.6799	-81.7717	50.7595	-111.482	76.35	0.55	75	swampy, lagoonal	3	3. swampy, lagoonal	NULL
	Marchantiopsida	15	uncertain	80	uncertain	105	Zlivisporis sp.	397	1203	Fern/Moss	2	Camp	1	Braman and Koppelhus, 2005	5	NULL	Dinosaur Park	16	59.4817	-76.5069	59.5952	-78.812	58.6799	-81.7717	50.7595	-111.482	76.35	0.55	75	swampy, lagoonal	3	3. swampy, lagoonal	NULL
	Bryopsida	3	uncertain	80	uncertain	105	Cingutriletes sp.	61	290	Fern/Moss	2	Camp	1	Franczyk et al., 1990; Fouch et al., 1983	8	NULL	Neslen	34	48.0277	-81.7673	48.0914	-83.6698	47.1279	-86.0766	39.0429	-109.726	74.25	2.15	75	coastal plain	4	4. coastal plain	NULL
	Magnoliopsida	13	uncertain	80	uncertain	105	Cupuliferoidaepollenites spp.	80	342	Angiosperm	1	Camp	1	Franczyk et al., 1990; Fouch et al., 1983	8	NULL	Neslen	34	48.0277	-81.7673	48.0914	-83.6698	47.1279	-86.0766	39.0429	-109.726	74.25	2.15	75	swampy, lagoonal	3	3. swampy, lagoonal	NULL
	Polypodiopsida	18	Cyatheales	16	Cyatheaceae?	32	Cyathidites minor	82	349	Fern/Moss	2	Camp	1	Franczyk et al., 1990; Fouch et al., 1983	8	NULL	Neslen	34	48.0277	-81.7673	48.0914	-83.6698	47.1279	-86.0766	39.0429	-109.726	74.25	2.15	75	temperate lowland forest	2	2. temperate lowland forest	NULL
	Liliopsida	10	Liliales	34	Liliaceae?	58	Liliacidites spp.	168	599	Angiosperm	1	Camp	1	Franczyk et al., 1990; Fouch et al., 1983	8	NULL	Neslen	34	48.0277	-81.7673	48.0914	-83.6698	47.1279	-86.0766	39.0429	-109.726	74.25	2.15	75	temperate lowland forest	2	2. temperate lowland forest	NULL
	Magnoliopsida	13	Proteales	61	uncertain	105	Proteacidites sp.	262	832	Angiosperm	1	Camp	1	Franczyk et al., 1990; Fouch et al., 1983	8	NULL	Neslen	34	48.0277	-81.7673	48.0914	-83.6698	47.1279	-86.0766	39.0429	-109.726	74.25	2.15	75	unknown	0	0. unknown	NULL
	Magnoliopsida	13	Magnoliales?	39	uncertain	105	Tricolpites spp.	358	1079	Angiosperm	1	Camp	1	Franczyk et al., 1990; Fouch et al., 1983	8	NULL	Neslen	34	48.0277	-81.7673	48.0914	-83.6698	47.1279	-86.0766	39.0429	-109.726	74.25	2.15	75	coastal plain	4	4. coastal plain	NULL
	Marchantiopsida	15	Sphaerocarpales	75	uncertain	105	Aequitriradites spinulosus	9	21	Fern/Moss	2	Camp	1	Franczyk et al., 1990; Fouch et al., 1983	8	NULL	Tuscher	40	48.1583	-81.675	48.2226	-83.5794	47.2598	-85.9899	39.185	-109.693	73.15	3.25	75	coastal plain	4	4. coastal plain	NULL
	Magnoliopsida	13	Santalales?	66	Santalaceae?	90	Aquilapollenites spp.	22	135	Angiosperm	1	Camp	1	Franczyk et al., 1990; Fouch et al., 1983	8	NULL	Tuscher	40	48.1583	-81.675	48.2226	-83.5794	47.2598	-85.9899	39.185	-109.693	73.15	3.25	75	temperate lowland forest	2	2. temperate lowland forest	NULL
	Liliopsida	10	Arecales	6	uncertain	105	Arecipites spp.	25	156	Angiosperm	1	Camp	1	Franczyk et al., 1990; Fouch et al., 1983	8	NULL	Tuscher	40	48.1583	-81.675	48.2226	-83.5794	47.2598	-85.9899	39.185	-109.693	73.15	3.25	75	swampy, lagoonal	3	3. swampy, lagoonal	NULL
	Polypodiopsida	18	Schizaeales	71	Schizaeaceae	93	Cicatricosisporites spp.	58	274	Fern/Moss	2	Camp	1	Franczyk et al., 1990; Fouch et al., 1983	8	NULL	Tuscher	40	48.1583	-81.675	48.2226	-83.5794	47.2598	-85.9899	39.185	-109.693	73.15	3.25	75	temperate lowland forest	2	2. temperate lowland forest	NULL
	Pinopsida	16	uncertain	80	uncertain	105	Corollina sp.	76	320	Gymnosperm	3	Camp	1	Franczyk et al., 1990; Fouch et al., 1983	8	NULL	Tuscher	40	48.1583	-81.675	48.2226	-83.5794	47.2598	-85.9899	39.185	-109.693	73.15	3.25	75	temperate lowland forest	2	2. temperate lowland forest	NULL
	Magnoliopsida	13	uncertain	80	uncertain	105	Cupuliferoidaepollenites spp.	80	342	Angiosperm	1	Camp	1	Franczyk et al., 1990; Fouch et al., 1983	8	NULL	Tuscher	40	48.1583	-81.675	48.2226	-83.5794	47.2598	-85.9899	39.185	-109.693	73.15	3.25	75	swampy, lagoonal	3	3. swampy, lagoonal	NULL
	Polypodiopsida	18	Cyatheales	16	Cyatheaceae?	32	Cyathidites minor	82	349	Fern/Moss	2	Camp	1	Franczyk et al., 1990; Fouch et al., 1983	8	NULL	Tuscher	40	48.1583	-81.675	48.2226	-83.5794	47.2598	-85.9899	39.185	-109.693	73.15	3.25	75	temperate lowland forest	2	2. temperate lowland forest	NULL
	Gnetopsida	8	Ephedrales	21	Ephedraceae	38	Ephedripites sp.	105	407	Gymnosperm	3	Camp	1	Franczyk et al., 1990; Fouch et al., 1983	8	NULL	Tuscher	40	48.1583	-81.675	48.2226	-83.5794	47.2598	-85.9899	39.185	-109.693	73.15	3.25	75	open scrubland	8	8. open scrubland	NULL
	Bryopsida?	4	uncertain	80	uncertain	105	Foraminisporis wonthaggiensis	116	445	Fern/Moss	2	Camp	1	Franczyk et al., 1990; Fouch et al., 1983	8	NULL	Tuscher	40	48.1583	-81.675	48.2226	-83.5794	47.2598	-85.9899	39.185	-109.693	73.15	3.25	75	coastal plain	4	4. coastal plain	NULL
	Polypodiopsida	18	uncertain	80	uncertain	105	Laevigatosporites sp.	158	569	Fern/Moss	2	Camp	1	Franczyk et al., 1990; Fouch et al., 1983	8	NULL	Tuscher	40	48.1583	-81.675	48.2226	-83.5794	47.2598	-85.9899	39.185	-109.693	73.15	3.25	75	coastal plain	4	4. coastal plain	NULL
	Liliopsida	10	Liliales	34	uncertain	105	Liliacidites spp.	168	599	Angiosperm	1	Camp	1	Franczyk et al., 1990; Fouch et al., 1983	8	NULL	Tuscher	40	48.1583	-81.675	48.2226	-83.5794	47.2598	-85.9899	39.185	-109.693	73.15	3.25	75	temperate lowland forest	2	2. temperate lowland forest	NULL
	Magnoliopsida	13	Santalales	65	Loranthaceae	59	Loranthacites sp. F	171	606	Angiosperm	1	Camp	1	Franczyk et al., 1990; Fouch et al., 1983	8	NULL	Tuscher	40	48.1583	-81.675	48.2226	-83.5794	47.2598	-85.9899	39.185	-109.693	73.15	3.25	75	tropical lowland forest	6	6. tropical lowland forest	NULL
	Ginkgoopsida?	7	uncertain	80	uncertain	105	Pityosporites spp.	243	774	Gymnosperm	3	Camp	1	Franczyk et al., 1990; Fouch et al., 1983	8	NULL	Tuscher	40	48.1583	-81.675	48.2226	-83.5794	47.2598	-85.9899	39.185	-109.693	73.15	3.25	75	coastal plain	4	4. coastal plain	NULL
	Polypodiopsida	18	Polypodiales	59	Polypodiaceae	81	Polypodiidites sp.	254	810	Fern/Moss	2	Camp	1	Franczyk et al., 1990; Fouch et al., 1983	8	NULL	Tuscher	40	48.1583	-81.675	48.2226	-83.5794	47.2598	-85.9899	39.185	-109.693	73.15	3.25	75	temperate lowland forest	2	2. temperate lowland forest	NULL
	Magnoliopsida	13	Proteales	61	uncertain	105	Proteacidites retusus	262	831	Angiosperm	1	Camp	1	Franczyk et al., 1990; Fouch et al., 1983	8	NULL	Tuscher	40	48.1583	-81.675	48.2226	-83.5794	47.2598	-85.9899	39.185	-109.693	73.15	3.25	75	unknown	0	0. unknown	NULL
	Magnoliopsida	13	Proteales	61	uncertain	105	Proteacidites sp.	262	832	Angiosperm	1	Camp	1	Franczyk et al., 1990; Fouch et al., 1983	8	NULL	Tuscher	40	48.1583	-81.675	48.2226	-83.5794	47.2598	-85.9899	39.185	-109.693	73.15	3.25	75	unknown	0	0. unknown	NULL
	Magnoliopsida	13	Fagales?	29	Juglandaceae?	56	Pseudoplicapollis newmanii	264	840	Angiosperm	1	Camp	1	Franczyk et al., 1990; Fouch et al., 1983	8	NULL	Tuscher	40	48.1583	-81.675	48.2226	-83.5794	47.2598	-85.9899	39.185	-109.693	73.15	3.25	75	coastal plain	4	4. coastal plain	NULL
	Bryopsida	3	uncertain	80	uncertain	105	Stereisporites sp.	329	992	Fern/Moss	2	Camp	1	Franczyk et al., 1990; Fouch et al., 1983	8	NULL	Tuscher	40	48.1583	-81.675	48.2226	-83.5794	47.2598	-85.9899	39.185	-109.693	73.15	3.25	75	coastal plain	4	4. coastal plain	NULL
	Pinopsida	16	Pinales	54	Cupressaceae?	30	Taxodiaceaepollenites hiatus	343	1015	Gymnosperm	3	Camp	1	Franczyk et al., 1990; Fouch et al., 1983	8	NULL	Tuscher	40	48.1583	-81.675	48.2226	-83.5794	47.2598	-85.9899	39.185	-109.693	73.15	3.25	75	temperate lowland forest	2	2. temperate lowland forest	NULL
	Magnoliopsida	13	Magnoliales?	39	uncertain	105	Tricolpites interangulus	358	1062	Angiosperm	1	Camp	1	Franczyk et al., 1990; Fouch et al., 1983	8	NULL	Tuscher	40	48.1583	-81.675	48.2226	-83.5794	47.2598	-85.9899	39.185	-109.693	73.15	3.25	75	coastal plain	4	4. coastal plain	NULL
	Magnoliopsida	13	Magnoliales?	39	uncertain	105	Tricolpites spp.	358	1079	Angiosperm	1	Camp	1	Franczyk et al., 1990; Fouch et al., 1983	8	NULL	Tuscher	40	48.1583	-81.675	48.2226	-83.5794	47.2598	-85.9899	39.185	-109.693	73.15	3.25	75	coastal plain	4	4. coastal plain	NULL
	Magnoliopsida	13	Rosales	63	Ulmaceae	102	Ulmipollenites spp.	380	1163	Angiosperm	1	Camp	1	Franczyk et al., 1990; Fouch et al., 1983	8	NULL	Tuscher	40	48.1583	-81.675	48.2226	-83.5794	47.2598	-85.9899	39.185	-109.693	73.15	3.25	75	temperate lowland forest	2	2. temperate lowland forest	NULL
	Marchantiopsida	15	uncertain	80	uncertain	105	Zlivisporis spp.	397	1204	Fern/Moss	2	Camp	1	Franczyk et al., 1990; Fouch et al., 1983	8	NULL	Tuscher	40	48.1583	-81.675	48.2226	-83.5794	47.2598	-85.9899	39.185	-109.693	73.15	3.25	75	swampy, lagoonal	3	3. swampy, lagoonal	NULL
	Magnoliopsida	13	Santalales?	66	Santalaceae?	90	Aquilapollenites attenuatus	22	69	Angiosperm	1	Camp	1	Franczyk et al., 1990; Fouch et al., 1983	8	NULL	Farrer	21	48.3777	-81.9991	48.4397	-83.9075	47.4747	-86.315	39.3413	-110.035	73.15	3.25	75	temperate lowland forest	2	2. temperate lowland forest	NULL
	Magnoliopsida	13	Santalales?	66	Santalaceae?	90	Aquilapollenites quadrilobus	22	124	Angiosperm	1	Camp	1	Franczyk et al., 1990; Fouch et al., 1983	8	NULL	Farrer	21	48.3777	-81.9991	48.4397	-83.9075	47.4747	-86.315	39.3413	-110.035	73.15	3.25	75	temperate lowland forest	2	2. temperate lowland forest	NULL
	Magnoliopsida	13	Santalales?	66	Santalaceae?	90	Aquilapollenites spp.	22	135	Angiosperm	1	Camp	1	Franczyk et al., 1990; Fouch et al., 1983	8	NULL	Farrer	21	48.3777	-81.9991	48.4397	-83.9075	47.4747	-86.315	39.3413	-110.035	73.15	3.25	75	temperate lowland forest	2	2. temperate lowland forest	NULL
	Magnoliopsida	13	Santalales?	66	Santalaceae?	90	Aquilapollenites turbidus	22	141	Angiosperm	1	Camp	1	Franczyk et al., 1990; Fouch et al., 1983	8	NULL	Farrer	21	48.3777	-81.9991	48.4397	-83.9075	47.4747	-86.315	39.3413	-110.035	73.15	3.25	75	temperate lowland forest	2	2. temperate lowland forest	NULL
	Pinopsida	16	Pinales	54	Araucariaceae	10	Araucariacites sp.	24	149	Gymnosperm	3	Camp	1	Franczyk et al., 1990; Fouch et al., 1983	8	NULL	Farrer	21	48.3777	-81.9991	48.4397	-83.9075	47.4747	-86.315	39.3413	-110.035	73.15	3.25	75	coastal plain	4	4. coastal plain	NULL
	Pinopsida	16	Pinales	54	Araucariaceae	10	Balmeisporites minor	31	190	Gymnosperm	3	Camp	1	Franczyk et al., 1990; Fouch et al., 1983	8	NULL	Farrer	21	48.3777	-81.9991	48.4397	-83.9075	47.4747	-86.315	39.3413	-110.035	73.15	3.25	75	coastal plain	4	4. coastal plain	NULL
	Lycopodiopsida	12	Lycopodiales	36	uncertain	105	Camarozonosporites insignis	44	225	Fern/Moss	2	Camp	1	Franczyk et al., 1990; Fouch et al., 1983	8	NULL	Farrer	21	48.3777	-81.9991	48.4397	-83.9075	47.4747	-86.315	39.3413	-110.035	73.15	3.25	75	coastal plain	4	4. coastal plain	NULL
	Polypodiopsida	18	Schizaeales	71	Schizaeaceae	93	Cicatricosisporites spp.	58	274	Fern/Moss	2	Camp	1	Franczyk et al., 1990; Fouch et al., 1983	8	NULL	Farrer	21	48.3777	-81.9991	48.4397	-83.9075	47.4747	-86.315	39.3413	-110.035	73.15	3.25	75	temperate lowland forest	2	2. temperate lowland forest	NULL
	Pinopsida	16	uncertain	80	uncertain	105	Corollina sp.	76	320	Gymnosperm	3	Camp	1	Franczyk et al., 1990; Fouch et al., 1983	8	NULL	Farrer	21	48.3777	-81.9991	48.4397	-83.9075	47.4747	-86.315	39.3413	-110.035	73.15	3.25	75	temperate lowland forest	2	2. temperate lowland forest	NULL
	Magnoliopsida	13	Santalales?	66	Loranthaceae?	60	Cranwellia striata	78	329	Angiosperm	1	Camp	1	Franczyk et al., 1990; Fouch et al., 1983	8	NULL	Farrer	21	48.3777	-81.9991	48.4397	-83.9075	47.4747	-86.315	39.3413	-110.035	73.15	3.25	75	temperate lowland forest	2	2. temperate lowland forest	NULL
	Magnoliopsida	13	Sapindales	67	Sapindaceae	91	Cupanieidites sp.	79	337	Angiosperm	1	Camp	1	Franczyk et al., 1990; Fouch et al., 1983	8	NULL	Farrer	21	48.3777	-81.9991	48.4397	-83.9075	47.4747	-86.315	39.3413	-110.035	73.15	3.25	75	wet, successional	5	5. wet, successional	NULL
	Polypodiopsida	18	Cyatheales?	17	Cyatheaceae?	32	Cyathidites minor	82	349	Fern/Moss	2	Camp	1	Franczyk et al., 1990; Fouch et al., 1983	8	NULL	Farrer	21	48.3777	-81.9991	48.4397	-83.9075	47.4747	-86.315	39.3413	-110.035	73.15	3.25	75	temperate lowland forest	2	2. temperate lowland forest	NULL
	Cycadopsida	5	Cycadales?	19	uncertain	105	Cycadopites spp.	84	362	Gymnosperm	3	Camp	1	Franczyk et al., 1990; Fouch et al., 1983	8	NULL	Farrer	21	48.3777	-81.9991	48.4397	-83.9075	47.4747	-86.315	39.3413	-110.035	73.15	3.25	75	tropical lowland forest	6	6. tropical lowland forest	NULL
	Lycopodiopsida	12	Selaginellales?	74	Selaginellaceae?	96	Echinatisporis varispinosus	97	389	Fern/Moss	2	Camp	1	Franczyk et al., 1990; Fouch et al., 1983	8	NULL	Farrer	21	48.3777	-81.9991	48.4397	-83.9075	47.4747	-86.315	39.3413	-110.035	73.15	3.25	75	estuarine, aquatic	7	7. estuarine, aquatic	NULL
	Gnetopsida	8	Ephedrales	21	Ephedraceae	38	Ephedripites sp.	105	407	Gymnosperm	3	Camp	1	Franczyk et al., 1990; Fouch et al., 1983	8	NULL	Farrer	21	48.3777	-81.9991	48.4397	-83.9075	47.4747	-86.315	39.3413	-110.035	73.15	3.25	75	open scrubland	8	8. open scrubland	NULL
	Magnoliopsida	13	Buxales	8	Buxaceae	20	Erdtmanipollis pachysandroides	107	422	Angiosperm	1	Camp	1	Franczyk et al., 1990; Fouch et al., 1983	8	NULL	Farrer	21	48.3777	-81.9991	48.4397	-83.9075	47.4747	-86.315	39.3413	-110.035	73.15	3.25	75	temperate lowland forest	2	2. temperate lowland forest	NULL
	Cycadopsida	5	Cycadales	18	uncertain	105	Eucommiidites minor	110	432	Gymnosperm	3	Camp	1	Franczyk et al., 1990; Fouch et al., 1983	8	NULL	Farrer	21	48.3777	-81.9991	48.4397	-83.9075	47.4747	-86.315	39.3413	-110.035	73.15	3.25	75	coastal plain	4	4. coastal plain	NULL
	Bryopsida?	4	uncertain	80	uncertain	105	Foraminisporis wonthaggiensis	116	445	Fern/Moss	2	Camp	1	Franczyk et al., 1990; Fouch et al., 1983	8	NULL	Farrer	21	48.3777	-81.9991	48.4397	-83.9075	47.4747	-86.315	39.3413	-110.035	73.15	3.25	75	coastal plain	4	4. coastal plain	NULL
	Polypodiopsida	18	Gleicheniales	30	Gleicheniaceae	49	Gleicheniidites senonicus	128	482	Fern/Moss	2	Camp	1	Franczyk et al., 1990; Fouch et al., 1983	8	NULL	Farrer	21	48.3777	-81.9991	48.4397	-83.9075	47.4747	-86.315	39.3413	-110.035	73.15	3.25	75	swampy, lagoonal	3	3. swampy, lagoonal	NULL
	Polypodiopsida	18	uncertain	80	uncertain	105	Laevigatosporites sp.	158	569	Fern/Moss	2	Camp	1	Franczyk et al., 1990; Fouch et al., 1983	8	NULL	Farrer	21	48.3777	-81.9991	48.4397	-83.9075	47.4747	-86.315	39.3413	-110.035	73.15	3.25	75	coastal plain	4	4. coastal plain	NULL
	Liliopsida	10	Liliales	34	uncertain	105	Liliacidites spp.	168	599	Angiosperm	1	Camp	1	Franczyk et al., 1990; Fouch et al., 1983	8	NULL	Farrer	21	48.3777	-81.9991	48.4397	-83.9075	47.4747	-86.315	39.3413	-110.035	73.15	3.25	75	temperate lowland forest	2	2. temperate lowland forest	NULL
	Magnoliopsida	13	Santalales	65	Loranthaceae	59	Loranthacites sp. F	171	606	Angiosperm	1	Camp	1	Franczyk et al., 1990; Fouch et al., 1983	8	NULL	Farrer	21	48.3777	-81.9991	48.4397	-83.9075	47.4747	-86.315	39.3413	-110.035	73.15	3.25	75	tropical lowland forest	6	6. tropical lowland forest	NULL
	Ginkgoopsida?	7	uncertain	80	uncertain	105	Pityosporites spp.	243	774	Gymnosperm	3	Camp	1	Franczyk et al., 1990; Fouch et al., 1983	8	NULL	Farrer	21	48.3777	-81.9991	48.4397	-83.9075	47.4747	-86.315	39.3413	-110.035	73.15	3.25	75	coastal plain	4	4. coastal plain	NULL
	Bryopsida?	4	uncertain	80	uncertain	105	Polycingulatisporites reduncus	252	805	Fern/Moss	2	Camp	1	Franczyk et al., 1990; Fouch et al., 1983	8	NULL	Farrer	21	48.3777	-81.9991	48.4397	-83.9075	47.4747	-86.315	39.3413	-110.035	73.15	3.25	75	coastal plain	4	4. coastal plain	NULL
	Magnoliopsida	13	Proteales	61	uncertain	105	Proteacidites retusus	262	831	Angiosperm	1	Camp	1	Franczyk et al., 1990; Fouch et al., 1983	8	NULL	Farrer	21	48.3777	-81.9991	48.4397	-83.9075	47.4747	-86.315	39.3413	-110.035	73.15	3.25	75	unknown	0	0. unknown	NULL
	Magnoliopsida	13	Proteales	61	uncertain	105	Proteacidites sp.	262	832	Angiosperm	1	Camp	1	Franczyk et al., 1990; Fouch et al., 1983	8	NULL	Farrer	21	48.3777	-81.9991	48.4397	-83.9075	47.4747	-86.315	39.3413	-110.035	73.15	3.25	75	unknown	0	0. unknown	NULL
	Magnoliopsida	13	Proteales	61	uncertain	105	Proteacidites thalmanii	262	835	Angiosperm	1	Camp	1	Franczyk et al., 1990; Fouch et al., 1983	8	NULL	Farrer	21	48.3777	-81.9991	48.4397	-83.9075	47.4747	-86.315	39.3413	-110.035	73.15	3.25	75	unknown	0	0. unknown	NULL
	Magnoliopsida	13	Fagales?	29	Juglandaceae?	56	Pseudoplicapollis newmanii	264	840	Angiosperm	1	Camp	1	Franczyk et al., 1990; Fouch et al., 1983	8	NULL	Farrer	21	48.3777	-81.9991	48.4397	-83.9075	47.4747	-86.315	39.3413	-110.035	73.15	3.25	75	coastal plain	4	4. coastal plain	NULL
	Pinopsida	16	Pinales	54	Cupressaceae?	30	Taxodiaceaepollenites hiatus	343	1015	Gymnosperm	3	Camp	1	Franczyk et al., 1990; Fouch et al., 1983	8	NULL	Farrer	21	48.3777	-81.9991	48.4397	-83.9075	47.4747	-86.315	39.3413	-110.035	73.15	3.25	75	temperate lowland forest	2	2. temperate lowland forest	NULL
	Magnoliopsida	13	Magnoliales?	39	uncertain	105	Tricolpites interangulus	358	1062	Angiosperm	1	Camp	1	Franczyk et al., 1990; Fouch et al., 1983	8	NULL	Farrer	21	48.3777	-81.9991	48.4397	-83.9075	47.4747	-86.315	39.3413	-110.035	73.15	3.25	75	coastal plain	4	4. coastal plain	NULL
	Magnoliopsida	13	Magnoliales?	39	uncertain	105	Tricolpites spp.	358	1079	Angiosperm	1	Camp	1	Franczyk et al., 1990; Fouch et al., 1983	8	NULL	Farrer	21	48.3777	-81.9991	48.4397	-83.9075	47.4747	-86.315	39.3413	-110.035	73.15	3.25	75	coastal plain	4	4. coastal plain	NULL
	Marchantiopsida	15	uncertain	80	uncertain	105	Zlivisporis spp.	397	1204	Fern/Moss	2	Camp	1	Franczyk et al., 1990; Fouch et al., 1983	8	NULL	Farrer	21	48.3777	-81.9991	48.4397	-83.9075	47.4747	-86.315	39.3413	-110.035	73.15	3.25	75	swampy, lagoonal	3	3. swampy, lagoonal	NULL
	Marchantiopsida	15	Sphaerocarpales	75	uncertain	105	Aequitriradites spinulosus	9	21	Fern/Moss	2	Camp	1	Franczyk et al., 1990; Fouch et al., 1983	8	NULL	Price River	35	48.7042	-83.3501	48.7565	-85.2653	47.7829	-87.6519	39.4282	-111.262	73.15	3.25	75	coastal plain	4	4. coastal plain	NULL
	Polypodiopsida	18	Schizaeales	71	uncertain	105	Appendicisporites spp.	21	56	Fern/Moss	2	Camp	1	Franczyk et al., 1990; Fouch et al., 1983	8	NULL	Price River	35	48.7042	-83.3501	48.7565	-85.2653	47.7829	-87.6519	39.4282	-111.262	73.15	3.25	75	temperate lowland forest	2	2. temperate lowland forest	NULL
	Magnoliopsida	13	Santalales?	66	Santalaceae?	90	Aquilapollenites attenuatus	22	69	Angiosperm	1	Camp	1	Franczyk et al., 1990; Fouch et al., 1983	8	NULL	Price River	35	48.7042	-83.3501	48.7565	-85.2653	47.7829	-87.6519	39.4282	-111.262	73.15	3.25	75	temperate lowland forest	2	2. temperate lowland forest	NULL
	Magnoliopsida	13	Santalales?	66	Santalaceae?	90	Aquilapollenites quadrilobus	22	124	Angiosperm	1	Camp	1	Franczyk et al., 1990; Fouch et al., 1983	8	NULL	Price River	35	48.7042	-83.3501	48.7565	-85.2653	47.7829	-87.6519	39.4282	-111.262	73.15	3.25	75	temperate lowland forest	2	2. temperate lowland forest	NULL
	Magnoliopsida	13	Santalales?	66	Santalaceae?	90	Aquilapollenites spp.	22	135	Angiosperm	1	Camp	1	Franczyk et al., 1990; Fouch et al., 1983	8	NULL	Price River	35	48.7042	-83.3501	48.7565	-85.2653	47.7829	-87.6519	39.4282	-111.262	73.15	3.25	75	temperate lowland forest	2	2. temperate lowland forest	NULL
	Pinopsida	16	Pinales	54	Araucariaceae	10	Araucariacites sp.	24	149	Gymnosperm	3	Camp	1	Franczyk et al., 1990; Fouch et al., 1983	8	NULL	Price River	35	48.7042	-83.3501	48.7565	-85.2653	47.7829	-87.6519	39.4282	-111.262	73.15	3.25	75	coastal plain	4	4. coastal plain	NULL
	Pinopsida	16	Pinales	54	Araucariaceae	10	Balmeisporites minor	31	190	Gymnosperm	3	Camp	1	Franczyk et al., 1990; Fouch et al., 1983	8	NULL	Price River	35	48.7042	-83.3501	48.7565	-85.2653	47.7829	-87.6519	39.4282	-111.262	73.15	3.25	75	coastal plain	4	4. coastal plain	NULL
	Pinopsida	16	uncertain	80	uncertain	105	Corollina sp.	76	320	Gymnosperm	3	Camp	1	Franczyk et al., 1990; Fouch et al., 1983	8	NULL	Price River	35	48.7042	-83.3501	48.7565	-85.2653	47.7829	-87.6519	39.4282	-111.262	73.15	3.25	75	temperate lowland forest	2	2. temperate lowland forest	NULL
	Polypodiopsida	18	Cyatheales	16	Cyatheaceae?	32	Cyathidites minor	82	349	Fern/Moss	2	Camp	1	Franczyk et al., 1990; Fouch et al., 1983	8	NULL	Price River	35	48.7042	-83.3501	48.7565	-85.2653	47.7829	-87.6519	39.4282	-111.262	73.15	3.25	75	temperate lowland forest	2	2. temperate lowland forest	NULL
	Cycadopsida	5	Cycadales?	19	uncertain	105	Cycadopites spp.	84	362	Gymnosperm	3	Camp	1	Franczyk et al., 1990; Fouch et al., 1983	8	NULL	Price River	35	48.7042	-83.3501	48.7565	-85.2653	47.7829	-87.6519	39.4282	-111.262	73.15	3.25	75	tropical lowland forest	6	6. tropical lowland forest	NULL
	Lycopodiopsida	12	Selaginellales?	74	Selaginellaceae?	96	Echinatisporis varispinosus	97	389	Fern/Moss	2	Camp	1	Franczyk et al., 1990; Fouch et al., 1983	8	NULL	Price River	35	48.7042	-83.3501	48.7565	-85.2653	47.7829	-87.6519	39.4282	-111.262	73.15	3.25	75	estuarine, aquatic	7	7. estuarine, aquatic	NULL
	Gnetopsida	8	Ephedrales	21	Ephedraceae	38	Ephedripites sp.	105	407	Gymnosperm	3	Camp	1	Franczyk et al., 1990; Fouch et al., 1983	8	NULL	Price River	35	48.7042	-83.3501	48.7565	-85.2653	47.7829	-87.6519	39.4282	-111.262	73.15	3.25	75	open scrubland	8	8. open scrubland	NULL
	Bryopsida?	4	uncertain	80	uncertain	105	Foraminisporis wonthaggiensis	116	445	Fern/Moss	2	Camp	1	Franczyk et al., 1990; Fouch et al., 1983	8	NULL	Price River	35	48.7042	-83.3501	48.7565	-85.2653	47.7829	-87.6519	39.4282	-111.262	73.15	3.25	75	coastal plain	4	4. coastal plain	NULL
	Polypodiopsida	18	uncertain	80	uncertain	105	Laevigatosporites sp.	158	569	Fern/Moss	2	Camp	1	Franczyk et al., 1990; Fouch et al., 1983	8	NULL	Price River	35	48.7042	-83.3501	48.7565	-85.2653	47.7829	-87.6519	39.4282	-111.262	73.15	3.25	75	coastal plain	4	4. coastal plain	NULL
	Liliopsida	10	Liliales	34	uncertain	105	Liliacidites spp.	168	599	Angiosperm	1	Camp	1	Franczyk et al., 1990; Fouch et al., 1983	8	NULL	Price River	35	48.7042	-83.3501	48.7565	-85.2653	47.7829	-87.6519	39.4282	-111.262	73.15	3.25	75	temperate lowland forest	2	2. temperate lowland forest	NULL
	Magnoliopsida	13	Santalales	65	Loranthaceae	59	Loranthacites sp. F	171	606	Angiosperm	1	Camp	1	Franczyk et al., 1990; Fouch et al., 1983	8	NULL	Price River	35	48.7042	-83.3501	48.7565	-85.2653	47.7829	-87.6519	39.4282	-111.262	73.15	3.25	75	tropical lowland forest	6	6. tropical lowland forest	NULL
	Polypodiopsida	18	Osmundales	51	Osmundaceae	74	Osmundacidites sp.	215	720	Fern/Moss	2	Camp	1	Franczyk et al., 1990; Fouch et al., 1983	8	NULL	Price River	35	48.7042	-83.3501	48.7565	-85.2653	47.7829	-87.6519	39.4282	-111.262	73.15	3.25	75	temperate lowland forest	2	2. temperate lowland forest	NULL
	Liliopsida?	11	Arecales?	7	Arecaceae?	12	Pandaniidites radicus	221	732	Angiosperm	1	Camp	1	Franczyk et al., 1990; Fouch et al., 1983	8	NULL	Price River	35	48.7042	-83.3501	48.7565	-85.2653	47.7829	-87.6519	39.4282	-111.262	73.15	3.25	75	swampy, lagoonal	3	3. swampy, lagoonal	NULL
	Ginkgoopsida?	7	uncertain	80	uncertain	105	Pityosporites spp.	243	774	Gymnosperm	3	Camp	1	Franczyk et al., 1990; Fouch et al., 1983	8	NULL	Price River	35	48.7042	-83.3501	48.7565	-85.2653	47.7829	-87.6519	39.4282	-111.262	73.15	3.25	75	coastal plain	4	4. coastal plain	NULL
	Bryopsida?	4	uncertain	80	uncertain	105	Polycingulatisporites reduncus	252	805	Fern/Moss	2	Camp	1	Franczyk et al., 1990; Fouch et al., 1983	8	NULL	Price River	35	48.7042	-83.3501	48.7565	-85.2653	47.7829	-87.6519	39.4282	-111.262	73.15	3.25	75	coastal plain	4	4. coastal plain	NULL
	Magnoliopsida	13	Proteales	61	uncertain	105	Proteacidites retusus	262	831	Angiosperm	1	Camp	1	Franczyk et al., 1990; Fouch et al., 1983	8	NULL	Price River	35	48.7042	-83.3501	48.7565	-85.2653	47.7829	-87.6519	39.4282	-111.262	73.15	3.25	75	unknown	0	0. unknown	NULL
	Magnoliopsida	13	Proteales	61	uncertain	105	Proteacidites sp.	262	832	Angiosperm	1	Camp	1	Franczyk et al., 1990; Fouch et al., 1983	8	NULL	Price River	35	48.7042	-83.3501	48.7565	-85.2653	47.7829	-87.6519	39.4282	-111.262	73.15	3.25	75	unknown	0	0. unknown	NULL
	Pinopsida	16	uncertain	80	uncertain	105	Rugubivesiculites sp.	297	915	Gymnosperm	3	Camp	1	Franczyk et al., 1990; Fouch et al., 1983	8	NULL	Price River	35	48.7042	-83.3501	48.7565	-85.2653	47.7829	-87.6519	39.4282	-111.262	73.15	3.25	75	coastal plain	4	4. coastal plain	NULL
	uncertain	23	uncertain	80	uncertain	105	Siberiapollis montanensis	314	952	Angiosperm	1	Camp	1	Franczyk et al., 1990; Fouch et al., 1983	8	NULL	Price River	35	48.7042	-83.3501	48.7565	-85.2653	47.7829	-87.6519	39.4282	-111.262	73.15	3.25	75	coastal plain	4	4. coastal plain	NULL
	Bryopsida	3	uncertain	80	uncertain	105	Stereisporites sp.	329	992	Fern/Moss	2	Camp	1	Franczyk et al., 1990; Fouch et al., 1983	8	NULL	Price River	35	48.7042	-83.3501	48.7565	-85.2653	47.7829	-87.6519	39.4282	-111.262	73.15	3.25	75	coastal plain	4	4. coastal plain	NULL
	Pinopsida	16	Pinales	54	Cupressaceae?	30	Taxodiaceaepollenites hiatus	343	1015	Gymnosperm	3	Camp	1	Franczyk et al., 1990; Fouch et al., 1983	8	NULL	Price River	35	48.7042	-83.3501	48.7565	-85.2653	47.7829	-87.6519	39.4282	-111.262	73.15	3.25	75	temperate lowland forest	2	2. temperate lowland forest	NULL
	Magnoliopsida	13	Magnoliales?	39	uncertain	105	Tricolpites interangulus	358	1062	Angiosperm	1	Camp	1	Franczyk et al., 1990; Fouch et al., 1983	8	NULL	Price River	35	48.7042	-83.3501	48.7565	-85.2653	47.7829	-87.6519	39.4282	-111.262	73.15	3.25	75	coastal plain	4	4. coastal plain	NULL
	Marchantiopsida	15	uncertain	80	uncertain	105	Zlivisporis spp.	397	1204	Fern/Moss	2	Camp	1	Franczyk et al., 1990; Fouch et al., 1983	8	NULL	Price River	35	48.7042	-83.3501	48.7565	-85.2653	47.7829	-87.6519	39.4282	-111.262	73.15	3.25	75	swampy, lagoonal	3	3. swampy, lagoonal	NULL
	Magnoliopsida	13	Santalales?	66	Santalaceae?	90	Aquilapollenites spp.	22	135	Angiosperm	1	Camp	1	Franczyk et al., 1990; Fouch et al., 1983	8	NULL	Blackhawk	4	48.8769	-82.8064	48.933	-84.7239	47.9628	-87.1232	39.6866	-110.87	79.95	3.65	75	temperate lowland forest	2	2. temperate lowland forest	NULL
	Pinopsida	16	Pinales	54	Araucariaceae	10	Araucariacites sp.	24	149	Gymnosperm	3	Camp	1	Franczyk et al., 1990; Fouch et al., 1983	8	NULL	Blackhawk	4	48.8769	-82.8064	48.933	-84.7239	47.9628	-87.1232	39.6866	-110.87	79.95	3.65	75	coastal plain	4	4. coastal plain	NULL
	Lycopodiopsida	12	Lycopodiales	36	uncertain	105	Camarozonosporites insignis	44	225	Fern/Moss	2	Camp	1	Franczyk et al., 1990; Fouch et al., 1983	8	NULL	Blackhawk	4	48.8769	-82.8064	48.933	-84.7239	47.9628	-87.1232	39.6866	-110.87	79.95	3.65	75	coastal plain	4	4. coastal plain	NULL
	Polypodiopsida	18	Schizaeales	71	Schizaeaceae	93	Cicatricosisporites spp.	58	274	Fern/Moss	2	Camp	1	Franczyk et al., 1990; Fouch et al., 1983	8	NULL	Blackhawk	4	48.8769	-82.8064	48.933	-84.7239	47.9628	-87.1232	39.6866	-110.87	79.95	3.65	75	temperate lowland forest	2	2. temperate lowland forest	NULL
	Bryopsida	3	uncertain	80	uncertain	105	Cingutriletes sp.	61	290	Fern/Moss	2	Camp	1	Franczyk et al., 1990; Fouch et al., 1983	8	NULL	Blackhawk	4	48.8769	-82.8064	48.933	-84.7239	47.9628	-87.1232	39.6866	-110.87	79.95	3.65	75	coastal plain	4	4. coastal plain	NULL
	Polypodiopsida	18	Cyatheales?	17	Cyatheaceae?	32	Cyathidites minor	82	349	Fern/Moss	2	Camp	1	Franczyk et al., 1990; Fouch et al., 1983	8	NULL	Blackhawk	4	48.8769	-82.8064	48.933	-84.7239	47.9628	-87.1232	39.6866	-110.87	79.95	3.65	75	temperate lowland forest	2	2. temperate lowland forest	NULL
	Polypodiopsida	18	Gleicheniales	30	Gleicheniaceae	49	Gleicheniidites senonicus	128	482	Fern/Moss	2	Camp	1	Franczyk et al., 1990; Fouch et al., 1983	8	NULL	Blackhawk	4	48.8769	-82.8064	48.933	-84.7239	47.9628	-87.1232	39.6866	-110.87	79.95	3.65	75	swampy, lagoonal	3	3. swampy, lagoonal	NULL
	Ginkgoopsida?	7	uncertain	80	uncertain	105	Pityosporites spp.	243	774	Gymnosperm	3	Camp	1	Franczyk et al., 1990; Fouch et al., 1983	8	NULL	Blackhawk	4	48.8769	-82.8064	48.933	-84.7239	47.9628	-87.1232	39.6866	-110.87	79.95	3.65	75	coastal plain	4	4. coastal plain	NULL
	Magnoliopsida	13	Proteales	61	uncertain	105	Proteacidites sp.	262	832	Angiosperm	1	Camp	1	Franczyk et al., 1990; Fouch et al., 1983	8	NULL	Blackhawk	4	48.8769	-82.8064	48.933	-84.7239	47.9628	-87.1232	39.6866	-110.87	79.95	3.65	75	unknown	0	0. unknown	NULL
	Lycopodiopsida	12	Lycopodiales	36	Lycopodiaceae	61	Sestrosporites pseudoalveolatus	313	951	Fern/Moss	2	Camp	1	Franczyk et al., 1990; Fouch et al., 1983	8	NULL	Blackhawk	4	48.8769	-82.8064	48.933	-84.7239	47.9628	-87.1232	39.6866	-110.87	79.95	3.65	75	upland forest	1	1. upland forest	NULL
	Pinopsida	16	Pinales	54	Cupressaceae?	30	Taxodiaceaepollenites hiatus	343	1015	Gymnosperm	3	Camp	1	Franczyk et al., 1990; Fouch et al., 1983	8	NULL	Blackhawk	4	48.8769	-82.8064	48.933	-84.7239	47.9628	-87.1232	39.6866	-110.87	79.95	3.65	75	temperate lowland forest	2	2. temperate lowland forest	NULL
	Magnoliopsida	13	Magnoliales?	39	uncertain	105	Tricolpites spp.	358	1079	Angiosperm	1	Camp	1	Franczyk et al., 1990; Fouch et al., 1983	8	NULL	Blackhawk	4	48.8769	-82.8064	48.933	-84.7239	47.9628	-87.1232	39.6866	-110.87	79.95	3.65	75	coastal plain	4	4. coastal plain	NULL
	Magnoliopsida	13	Proteales	61	Proteaceae	84	Triporopollenites spp.	370	1140	Angiosperm	1	Camp	1	Franczyk et al., 1990; Fouch et al., 1983	8	NULL	Blackhawk	4	48.8769	-82.8064	48.933	-84.7239	47.9628	-87.1232	39.6866	-110.87	79.95	3.65	75	coastal plain	4	4. coastal plain	NULL
	Pinopsida	16	Pinales	54	Araucariaceae	10	Balmeisporites minor	31	190	Gymnosperm	3	Camp	1	Franczyk et al., 1990; Fouch et al., 1983	8	NULL	Mesaverde	31	49.5565	-82.7332	49.6132	-84.6621	48.6433	-87.0725	40.3555	-111.039	77.45	2.25	75	coastal plain	4	4. coastal plain	NULL
	Polypodiopsida	18	Schizaeales	71	Schizaeaceae	93	Cicatricosisporites spp.	58	274	Fern/Moss	2	Camp	1	Franczyk et al., 1990; Fouch et al., 1983	8	NULL	Mesaverde	31	49.5565	-82.7332	49.6132	-84.6621	48.6433	-87.0725	40.3555	-111.039	77.45	2.25	75	temperate lowland forest	2	2. temperate lowland forest	NULL
	Magnoliopsida	13	uncertain	80	uncertain	105	Cupuliferoidaepollenites spp.	80	342	Angiosperm	1	Camp	1	Franczyk et al., 1990; Fouch et al., 1983	8	NULL	Mesaverde	31	49.5565	-82.7332	49.6132	-84.6621	48.6433	-87.0725	40.3555	-111.039	77.45	2.25	75	swampy, lagoonal	3	3. swampy, lagoonal	NULL
	Polypodiopsida	18	Cyatheales?	17	Cyatheaceae?	32	Cyathidites minor	82	349	Fern/Moss	2	Camp	1	Franczyk et al., 1990; Fouch et al., 1983	8	NULL	Mesaverde	31	49.5565	-82.7332	49.6132	-84.6621	48.6433	-87.0725	40.3555	-111.039	77.45	2.25	75	temperate lowland forest	2	2. temperate lowland forest	NULL
	Polypodiopsida	18	uncertain	80	uncertain	105	Laevigatosporites sp.	158	569	Fern/Moss	2	Camp	1	Franczyk et al., 1990; Fouch et al., 1983	8	NULL	Mesaverde	31	49.5565	-82.7332	49.6132	-84.6621	48.6433	-87.0725	40.3555	-111.039	77.45	2.25	75	coastal plain	4	4. coastal plain	NULL
	Ginkgoopsida?	7	uncertain	80	uncertain	105	Pityosporites spp.	243	774	Gymnosperm	3	Camp	1	Franczyk et al., 1990; Fouch et al., 1983	8	NULL	Mesaverde	31	49.5565	-82.7332	49.6132	-84.6621	48.6433	-87.0725	40.3555	-111.039	77.45	2.25	75	coastal plain	4	4. coastal plain	NULL
	Magnoliopsida	13	Proteales	61	uncertain	105	Proteacidites sp.	262	832	Angiosperm	1	Camp	1	Franczyk et al., 1990; Fouch et al., 1983	8	NULL	Mesaverde	31	49.5565	-82.7332	49.6132	-84.6621	48.6433	-87.0725	40.3555	-111.039	77.45	2.25	75	unknown	0	0. unknown	NULL
	Magnoliopsida	13	Magnoliales?	39	uncertain	105	Tricolpites interangulus	358	1062	Angiosperm	1	Camp	1	Franczyk et al., 1990; Fouch et al., 1983	8	NULL	Mesaverde	31	49.5565	-82.7332	49.6132	-84.6621	48.6433	-87.0725	40.3555	-111.039	77.45	2.25	75	coastal plain	4	4. coastal plain	NULL
	Magnoliopsida	13	Magnoliales?	39	uncertain	105	Tricolpites spp.	358	1079	Angiosperm	1	Camp	1	Franczyk et al., 1990; Fouch et al., 1983	8	NULL	Mesaverde	31	49.5565	-82.7332	49.6132	-84.6621	48.6433	-87.0725	40.3555	-111.039	77.45	2.25	75	coastal plain	4	4. coastal plain	NULL
	Pinopsida	16	Pinales?	55	Pinaceae?	77	Abietineaepollenites dakotensis	2	2	Gymnosperm	3	Camp	1	Gallucci, 1986	10	0.05	Adaville	1	50.3212	-80.6301	50.3929	-82.5696	49.4368	-85.0331	41.6934	-110.624	82.3	1.3	80	upland forest	1	1. upland forest	NULL
	Pinopsida	16	Pinales?	55	Pinaceae?	77	Abietineaepollenites microreticulatus	2	3	Gymnosperm	3	Camp	1	Gallucci, 1986	10	0.02	Adaville	1	50.3212	-80.6301	50.3929	-82.5696	49.4368	-85.0331	41.6934	-110.624	82.3	1.3	80	upland forest	1	1. upland forest	NULL
	Pinopsida	16	Pinales?	55	Pinaceae?	77	Abietineaepollenites varius	2	5	Gymnosperm	3	Camp	1	Gallucci, 1986	10	0.06	Adaville	1	50.3212	-80.6301	50.3929	-82.5696	49.4368	-85.0331	41.6934	-110.624	82.3	1.3	80	upland forest	1	1. upland forest	NULL
	Lycopodiopsida	12	Selaginellales	73	Selaginellaceae	95	Acanthotriletes varispinosus	4	9	Fern/Moss	2	Camp	1	Gallucci, 1986	10	0.26	Adaville	1	50.3212	-80.6301	50.3929	-82.5696	49.4368	-85.0331	41.6934	-110.624	82.3	1.3	80	swampy, lagoonal	3	3. swampy, lagoonal	NULL
	Pinopsida	16	Pinales?	55	uncertain	105	Alisporites bilateralis	13	29	Gymnosperm	3	Camp	1	Gallucci, 1986	10	0.09	Adaville	1	50.3212	-80.6301	50.3929	-82.5696	49.4368	-85.0331	41.6934	-110.624	82.3	1.3	80	coastal plain	4	4. coastal plain	NULL
	Polypodiopsida	18	Schizaeales	71	uncertain	105	Appendicisporites insignis	21	54	Fern/Moss	2	Camp	1	Gallucci, 1986	10	0.6	Adaville	1	50.3212	-80.6301	50.3929	-82.5696	49.4368	-85.0331	41.6934	-110.624	82.3	1.3	80	temperate lowland forest	2	2. temperate lowland forest	NULL
	Polypodiopsida	18	Schizaeales	71	uncertain	105	Appendicisporites undosus	21	58	Fern/Moss	2	Camp	1	Gallucci, 1986	10	0.03	Adaville	1	50.3212	-80.6301	50.3929	-82.5696	49.4368	-85.0331	41.6934	-110.624	82.3	1.3	80	temperate lowland forest	2	2. temperate lowland forest	NULL
	Pinopsida	16	Pinales	54	Araucariaceae	10	Araucariacites australis	24	147	Gymnosperm	3	Camp	1	Gallucci, 1986	10	2.64	Adaville	1	50.3212	-80.6301	50.3929	-82.5696	49.4368	-85.0331	41.6934	-110.624	82.3	1.3	80	coastal plain	4	4. coastal plain	NULL
	Polypodiopsida	18	uncertain	80	uncertain	105	Baculatisporites comaumensis	30	181	Fern/Moss	2	Camp	1	Gallucci, 1986	10	0.46	Adaville	1	50.3212	-80.6301	50.3929	-82.5696	49.4368	-85.0331	41.6934	-110.624	82.3	1.3	80	coastal plain	4	4. coastal plain	NULL
	Magnoliopsida	13	Fagales?	29	Betulaceae?	19	Betulapollenites sp.	37	205	Angiosperm	1	Camp	1	Gallucci, 1986	10	0.3	Adaville	1	50.3212	-80.6301	50.3929	-82.5696	49.4368	-85.0331	41.6934	-110.624	82.3	1.3	80	temperate lowland forest	2	2. temperate lowland forest	NULL
	Polypodiopsida	18	Schizaeales	71	Schizaeaceae	93	Biretisporites potoniaei	38	207	Fern/Moss	2	Camp	1	Gallucci, 1986	10	0.05	Adaville	1	50.3212	-80.6301	50.3929	-82.5696	49.4368	-85.0331	41.6934	-110.624	82.3	1.3	80	temperate lowland forest	2	2. temperate lowland forest	NULL
	Lycopodiopsida	12	Lycopodiales	36	uncertain	105	Camarozonosporites hammenii	44	223	Fern/Moss	2	Camp	1	Gallucci, 1986	10	0.11	Adaville	1	50.3212	-80.6301	50.3929	-82.5696	49.4368	-85.0331	41.6934	-110.624	82.3	1.3	80	coastal plain	4	4. coastal plain	NULL
	Lycopodiopsida	12	Lycopodiales	36	uncertain	105	Camarozonosporites spp.	44	227	Fern/Moss	2	Camp	1	Gallucci, 1986	10	0.02	Adaville	1	50.3212	-80.6301	50.3929	-82.5696	49.4368	-85.0331	41.6934	-110.624	82.3	1.3	80	coastal plain	4	4. coastal plain	NULL
	Lycopodiopsida	12	Selaginellales	73	Selaginellaceae	95	Ceratosporites parvus	52	243	Fern/Moss	2	Camp	1	Gallucci, 1986	10	0.01	Adaville	1	50.3212	-80.6301	50.3929	-82.5696	49.4368	-85.0331	41.6934	-110.624	82.3	1.3	80	tropical lowland forest	6	6. tropical lowland forest	NULL
	Polypodiopsida	18	Schizaeales	71	Schizaeaceae	93	Cicatricosisporites australiensis	58	255	Fern/Moss	2	Camp	1	Gallucci, 1986	10	0.01	Adaville	1	50.3212	-80.6301	50.3929	-82.5696	49.4368	-85.0331	41.6934	-110.624	82.3	1.3	80	temperate lowland forest	2	2. temperate lowland forest	NULL
	Polypodiopsida	18	Schizaeales	71	Schizaeaceae	93	Cicatricosisporites crassiterminatus	58	259	Fern/Moss	2	Camp	1	Gallucci, 1986	10	0.06	Adaville	1	50.3212	-80.6301	50.3929	-82.5696	49.4368	-85.0331	41.6934	-110.624	82.3	1.3	80	temperate lowland forest	2	2. temperate lowland forest	NULL
	Polypodiopsida	18	Schizaeales	71	Schizaeaceae	93	Cicatricosisporites hallei	58	264	Fern/Moss	2	Camp	1	Gallucci, 1986	10	0.27	Adaville	1	50.3212	-80.6301	50.3929	-82.5696	49.4368	-85.0331	41.6934	-110.624	82.3	1.3	80	temperate lowland forest	2	2. temperate lowland forest	NULL
	Bryopsida	3	uncertain	80	uncertain	105	Cingutriletes clavus	61	288	Fern/Moss	2	Camp	1	Gallucci, 1986	10	0.1	Adaville	1	50.3212	-80.6301	50.3929	-82.5696	49.4368	-85.0331	41.6934	-110.624	82.3	1.3	80	coastal plain	4	4. coastal plain	NULL
	Magnoliopsida	13	Chloranthales	12	Chloranthaceae	27	Clavatipollenites sp.	66	302	Angiosperm	1	Camp	1	Gallucci, 1986	10	0.08	Adaville	1	50.3212	-80.6301	50.3929	-82.5696	49.4368	-85.0331	41.6934	-110.624	82.3	1.3	80	upland forest	1	1. upland forest	NULL
	Pinopsida	16	uncertain	80	uncertain	105	Corollina classoides	76	319	Gymnosperm	3	Camp	1	Gallucci, 1986	10	1.33	Adaville	1	50.3212	-80.6301	50.3929	-82.5696	49.4368	-85.0331	41.6934	-110.624	82.3	1.3	80	temperate lowland forest	2	2. temperate lowland forest	NULL
	Magnoliopsida	13	uncertain	80	uncertain	105	Cupuliferoidaepollenites minutus	80	339	Angiosperm	1	Camp	1	Gallucci, 1986	10	3.76	Adaville	1	50.3212	-80.6301	50.3929	-82.5696	49.4368	-85.0331	41.6934	-110.624	82.3	1.3	80	swampy, lagoonal	3	3. swampy, lagoonal	NULL
	Polypodiopsida	18	Cyatheales?	17	Cyatheaceae?	32	Cyathidites minor	82	349	Fern/Moss	2	Camp	1	Gallucci, 1986	10	4.42	Adaville	1	50.3212	-80.6301	50.3929	-82.5696	49.4368	-85.0331	41.6934	-110.624	82.3	1.3	80	temperate lowland forest	2	2. temperate lowland forest	NULL
	Polypodiopsida	18	uncertain	80	uncertain	105	Deltoidospora hallii	86	366	Fern/Moss	2	Camp	1	Gallucci, 1986	10	6.45	Adaville	1	50.3212	-80.6301	50.3929	-82.5696	49.4368	-85.0331	41.6934	-110.624	82.3	1.3	80	temperate lowland forest	2	2. temperate lowland forest	NULL
	Polypodiopsida	18	Equisetales	22	Equisetaceae	39	Equisetosporites ovatus	106	415	Fern/Moss	2	Camp	1	Gallucci, 1986	10	0.01	Adaville	1	50.3212	-80.6301	50.3929	-82.5696	49.4368	-85.0331	41.6934	-110.624	82.3	1.3	80	open scrubland	8	8. open scrubland	NULL
	uncertain	23	uncertain	80	uncertain	105	Foveasporis triangulus	117	448	Fern/Moss	2	Camp	1	Gallucci, 1986	10	0.07	Adaville	1	50.3212	-80.6301	50.3929	-82.5696	49.4368	-85.0331	41.6934	-110.624	82.3	1.3	80	temperate lowland forest	2	2. temperate lowland forest	NULL
	Lycopodiopsida	12	Lycopodiales?	37	Lycopodiaceae?	62	Foveotriletes subtriangularis	121	462	Fern/Moss	2	Camp	1	Gallucci, 1986	10	3.24	Adaville	1	50.3212	-80.6301	50.3929	-82.5696	49.4368	-85.0331	41.6934	-110.624	82.3	1.3	80	estuarine, aquatic	7	7. estuarine, aquatic	NULL
	Magnoliopsida	13	uncertain	80	uncertain	105	Gemmatricolpites gemmatus	125	469	Angiosperm	1	Camp	1	Gallucci, 1986	10	0.15	Adaville	1	50.3212	-80.6301	50.3929	-82.5696	49.4368	-85.0331	41.6934	-110.624	82.3	1.3	80	coastal plain	4	4. coastal plain	NULL
	Polypodiopsida	18	Gleicheniales	30	Gleicheniaceae	49	Gleicheniidites senonicus	128	482	Fern/Moss	2	Camp	1	Gallucci, 1986	10	0.03	Adaville	1	50.3212	-80.6301	50.3929	-82.5696	49.4368	-85.0331	41.6934	-110.624	82.3	1.3	80	swampy, lagoonal	3	3. swampy, lagoonal	NULL
	Polypodiopsida	18	uncertain	80	uncertain	105	Granulatisporites arenaster	131	490	Fern/Moss	2	Camp	1	Gallucci, 1986	10	0.03	Adaville	1	50.3212	-80.6301	50.3929	-82.5696	49.4368	-85.0331	41.6934	-110.624	82.3	1.3	80	temperate lowland forest	2	2. temperate lowland forest	NULL
	Polypodiopsida?	19	uncertain	80	uncertain	105	Hazaria canadiana	138	504	Fern/Moss	2	Camp	1	Gallucci, 1986	10	10.28	Adaville	1	50.3212	-80.6301	50.3929	-82.5696	49.4368	-85.0331	41.6934	-110.624	82.3	1.3	80	unknown	0	0. unknown	NULL
	Pinopsida	16	Pinales?	55	uncertain	105	Inaperturopollenites spp.	147	528	Gymnosperm	3	Camp	1	Gallucci, 1986	10	5.46181	Adaville	1	50.3212	-80.6301	50.3929	-82.5696	49.4368	-85.0331	41.6934	-110.624	82.3	1.3	80	temperate lowland forest	2	2. temperate lowland forest	NULL
	Polypodiopsida	18	uncertain	80	uncertain	105	Laevigatosporites ovatus	158	567	Fern/Moss	2	Camp	1	Gallucci, 1986	10	6.59	Adaville	1	50.3212	-80.6301	50.3929	-82.5696	49.4368	-85.0331	41.6934	-110.624	82.3	1.3	80	coastal plain	4	4. coastal plain	NULL
	Liliopsida	10	Liliales	34	uncertain	105	Liliacidites spp.	168	599	Angiosperm	1	Camp	1	Gallucci, 1986	10	0.06	Adaville	1	50.3212	-80.6301	50.3929	-82.5696	49.4368	-85.0331	41.6934	-110.624	82.3	1.3	80	temperate lowland forest	2	2. temperate lowland forest	NULL
	Polypodiopsida	18	Cyatheales?	17	Dicksoniaceae?	36	Matonisporites equiexinus	185	654	Fern/Moss	2	Camp	1	Gallucci, 1986	10	0.28	Adaville	1	50.3212	-80.6301	50.3929	-82.5696	49.4368	-85.0331	41.6934	-110.624	82.3	1.3	80	temperate lowland forest	2	2. temperate lowland forest	NULL
	Polypodiopsida	18	Cyatheales?	17	Dicksoniaceae?	36	Matonisporites sp.	185	657	Fern/Moss	2	Camp	1	Gallucci, 1986	10	0.1	Adaville	1	50.3212	-80.6301	50.3929	-82.5696	49.4368	-85.0331	41.6934	-110.624	82.3	1.3	80	temperate lowland forest	2	2. temperate lowland forest	NULL
	uncertain	23	uncertain	80	uncertain	105	Monolete spp.	192	677	Fern/Moss	2	Camp	1	Gallucci, 1986	10	0.01	Adaville	1	50.3212	-80.6301	50.3929	-82.5696	49.4368	-85.0331	41.6934	-110.624	82.3	1.3	80	swampy, lagoonal	3	3. swampy, lagoonal	NULL
	Magnoliopsida	13	Fagales	28	uncertain	105	Normapolles spp.	206	704	Angiosperm	1	Camp	1	Gallucci, 1986	10	0.01	Adaville	1	50.3212	-80.6301	50.3929	-82.5696	49.4368	-85.0331	41.6934	-110.624	82.3	1.3	80	swampy, lagoonal	3	3. swampy, lagoonal	NULL
	Magnoliopsida	13	Malpighiales?	41	Euphorbiaceae?	44	Nyssapollenites triangulus	210	712	Angiosperm	1	Camp	1	Gallucci, 1986	10	0.02	Adaville	1	50.3212	-80.6301	50.3929	-82.5696	49.4368	-85.0331	41.6934	-110.624	82.3	1.3	80	wet, successional	5	5. wet, successional	NULL
	Polypodiopsida	18	Gleicheniales	30	Gleicheniaceae	49	Ornamentifera baculata	213	717	Fern/Moss	2	Camp	1	Gallucci, 1986	10	0.02	Adaville	1	50.3212	-80.6301	50.3929	-82.5696	49.4368	-85.0331	41.6934	-110.624	82.3	1.3	80	upland forest	1	1. upland forest	NULL
	Magnoliopsida	13	Proteales	61	uncertain	105	Proteacidites retusus	262	831	Angiosperm	1	Camp	1	Gallucci, 1986	10	0.01	Adaville	1	50.3212	-80.6301	50.3929	-82.5696	49.4368	-85.0331	41.6934	-110.624	82.3	1.3	80	unknown	0	0. unknown	NULL
	Magnoliopsida	13	Proteales	61	uncertain	105	Proteacidites spp.	262	833	Angiosperm	1	Camp	1	Gallucci, 1986	10	0.02	Adaville	1	50.3212	-80.6301	50.3929	-82.5696	49.4368	-85.0331	41.6934	-110.624	82.3	1.3	80	unknown	0	0. unknown	NULL
	Magnoliopsida	13	Proteales	61	uncertain	105	Proteacidites thalmanii	262	835	Angiosperm	1	Camp	1	Gallucci, 1986	10	3.71	Adaville	1	50.3212	-80.6301	50.3929	-82.5696	49.4368	-85.0331	41.6934	-110.624	82.3	1.3	80	unknown	0	0. unknown	NULL
	Magnoliopsida	13	Fagales?	29	Juglandaceae?	56	Pseudoplicapollis endocuspis	264	839	Angiosperm	1	Camp	1	Gallucci, 1986	10	1.09	Adaville	1	50.3212	-80.6301	50.3929	-82.5696	49.4368	-85.0331	41.6934	-110.624	82.3	1.3	80	coastal plain	4	4. coastal plain	NULL
	Magnoliopsida	13	Fagales?	29	Juglandaceae?	56	Pseudoplicapollis newmanii	264	840	Angiosperm	1	Camp	1	Gallucci, 1986	10	0.63	Adaville	1	50.3212	-80.6301	50.3929	-82.5696	49.4368	-85.0331	41.6934	-110.624	82.3	1.3	80	coastal plain	4	4. coastal plain	NULL
	Magnoliopsida	13	Magnoliales?	39	uncertain	105	Retitricolpites georgensis	290	882	Angiosperm	1	Camp	1	Gallucci, 1986	10	1.69	Adaville	1	50.3212	-80.6301	50.3929	-82.5696	49.4368	-85.0331	41.6934	-110.624	82.3	1.3	80	coastal plain	4	4. coastal plain	NULL
	Magnoliopsida	13	Magnoliales?	39	uncertain	105	Retitricolpites sp.	290	884	Angiosperm	1	Camp	1	Gallucci, 1986	10	0.03	Adaville	1	50.3212	-80.6301	50.3929	-82.5696	49.4368	-85.0331	41.6934	-110.624	82.3	1.3	80	coastal plain	4	4. coastal plain	NULL
	Magnoliopsida	13	Magnoliales?	39	uncertain	105	Retitricolpites spp.	290	885	Angiosperm	1	Camp	1	Gallucci, 1986	10	4.12153	Adaville	1	50.3212	-80.6301	50.3929	-82.5696	49.4368	-85.0331	41.6934	-110.624	82.3	1.3	80	coastal plain	4	4. coastal plain	NULL
	Magnoliopsida	13	Magnoliales?	39	uncertain	105	Retitricolpites vulgaris	290	886	Angiosperm	1	Camp	1	Gallucci, 1986	10	0.07	Adaville	1	50.3212	-80.6301	50.3929	-82.5696	49.4368	-85.0331	41.6934	-110.624	82.3	1.3	80	coastal plain	4	4. coastal plain	NULL
	Sphagnopsida	22	Sphagnales	76	Sphagnaceae	99	Sphagnumsporites australis	322	966	Fern/Moss	2	Camp	1	Gallucci, 1986	10	0.81	Adaville	1	50.3212	-80.6301	50.3929	-82.5696	49.4368	-85.0331	41.6934	-110.624	82.3	1.3	80	swampy, lagoonal	3	3. swampy, lagoonal	NULL
	Bryopsida	3	uncertain	80	uncertain	105	Stereisporites antiquasporites	329	987	Fern/Moss	2	Camp	1	Gallucci, 1986	10	2.42	Adaville	1	50.3212	-80.6301	50.3929	-82.5696	49.4368	-85.0331	41.6934	-110.624	82.3	1.3	80	coastal plain	4	4. coastal plain	NULL
	Pinopsida	16	Pinales	54	Cupressaceae?	30	Taxodiaceaepollenites hiatus	343	1015	Gymnosperm	3	Camp	1	Gallucci, 1986	10	3.89	Adaville	1	50.3212	-80.6301	50.3929	-82.5696	49.4368	-85.0331	41.6934	-110.624	82.3	1.3	80	temperate lowland forest	2	2. temperate lowland forest	NULL
	Magnoliopsida	13	Magnoliales?	39	uncertain	105	Tricolpites interangulus	358	1062	Angiosperm	1	Camp	1	Gallucci, 1986	10	2.04	Adaville	1	50.3212	-80.6301	50.3929	-82.5696	49.4368	-85.0331	41.6934	-110.624	82.3	1.3	80	coastal plain	4	4. coastal plain	NULL
	Magnoliopsida	13	Magnoliales?	39	uncertain	105	Tricolporites dakotensis	361	1097	Angiosperm	1	Camp	1	Gallucci, 1986	10	0.08	Adaville	1	50.3212	-80.6301	50.3929	-82.5696	49.4368	-85.0331	41.6934	-110.624	82.3	1.3	80	temperate lowland forest	2	2. temperate lowland forest	NULL
	Magnoliopsida	13	Proteales	61	Proteaceae	84	Triporopollenites scabroporus	370	1138	Angiosperm	1	Camp	1	Gallucci, 1986	10	1.93	Adaville	1	50.3212	-80.6301	50.3929	-82.5696	49.4368	-85.0331	41.6934	-110.624	82.3	1.3	80	coastal plain	4	4. coastal plain	NULL
	Polypodiopsida	18	Schizaeales	71	Schizaeaceae	93	Undulatisporites undulapolus	383	1169	Fern/Moss	2	Camp	1	Gallucci, 1986	10	0.5	Adaville	1	50.3212	-80.6301	50.3929	-82.5696	49.4368	-85.0331	41.6934	-110.624	82.3	1.3	80	tropical lowland forest	6	6. tropical lowland forest	NULL
	Pteridospermatopsida?	21	Caytoniales?	11	Caytoniaceae?	22	Vitreisporites pallidus	393	1186	Gymnosperm	3	Camp	1	Gallucci, 1986	10	0.16	Adaville	1	50.3212	-80.6301	50.3929	-82.5696	49.4368	-85.0331	41.6934	-110.624	82.3	1.3	80	temperate lowland forest	2	2. temperate lowland forest	NULL
	Lycopodiopsida	12	Selaginellales	73	Selaginellaceae	95	Acanthotriletes varispinosus	4	9	Fern/Moss	2	Camp	1	Jarzen, 1982	11	NULL	Dinosaur Park	16	59.4817	-76.5069	59.5952	-78.812	58.6799	-81.7717	50.7595	-111.482	76.35	0.55	75	swampy, lagoonal	3	3. swampy, lagoonal	NULL
	Marchantiopsida	15	Sphaerocarpales	75	uncertain	105	Aequitriradites oranatus	9	19	Fern/Moss	2	Camp	1	Jarzen, 1982	11	NULL	Dinosaur Park	16	59.4817	-76.5069	59.5952	-78.812	58.6799	-81.7717	50.7595	-111.482	76.35	0.55	75	coastal plain	4	4. coastal plain	NULL
	Pinopsida	16	Pinales?	55	uncertain	105	Alisporites bilateralis	13	29	Gymnosperm	3	Camp	1	Jarzen, 1982	11	NULL	Dinosaur Park	16	59.4817	-76.5069	59.5952	-78.812	58.6799	-81.7717	50.7595	-111.482	76.35	0.55	75	coastal plain	4	4. coastal plain	NULL
	Magnoliopsida	13	Santalales?	66	Santalaceae?	90	Aquilapollenites amplus	22	62	Angiosperm	1	Camp	1	Jarzen, 1982	11	NULL	Dinosaur Park	16	59.4817	-76.5069	59.5952	-78.812	58.6799	-81.7717	50.7595	-111.482	76.35	0.55	75	temperate lowland forest	2	2. temperate lowland forest	NULL
	Magnoliopsida	13	Santalales?	66	Santalaceae?	90	Aquilapollenites asper	22	68	Angiosperm	1	Camp	1	Jarzen, 1982	11	NULL	Dinosaur Park	16	59.4817	-76.5069	59.5952	-78.812	58.6799	-81.7717	50.7595	-111.482	76.35	0.55	75	temperate lowland forest	2	2. temperate lowland forest	NULL
	Magnoliopsida	13	Santalales?	66	Santalaceae?	90	Aquilapollenites attenuatus	22	69	Angiosperm	1	Camp	1	Jarzen, 1982	11	NULL	Dinosaur Park	16	59.4817	-76.5069	59.5952	-78.812	58.6799	-81.7717	50.7595	-111.482	76.35	0.55	75	temperate lowland forest	2	2. temperate lowland forest	NULL
	Magnoliopsida	13	Santalales?	66	Santalaceae?	90	Aquilapollenites calvus	22	74	Angiosperm	1	Camp	1	Jarzen, 1982	11	NULL	Dinosaur Park	16	59.4817	-76.5069	59.5952	-78.812	58.6799	-81.7717	50.7595	-111.482	76.35	0.55	75	temperate lowland forest	2	2. temperate lowland forest	NULL
	Magnoliopsida	13	Santalales?	66	Santalaceae?	90	Aquilapollenites clarireticulatus	22	83	Angiosperm	1	Camp	1	Jarzen, 1982	11	NULL	Dinosaur Park	16	59.4817	-76.5069	59.5952	-78.812	58.6799	-81.7717	50.7595	-111.482	76.35	0.55	75	temperate lowland forest	2	2. temperate lowland forest	NULL
	Magnoliopsida	13	Santalales?	66	Santalaceae?	90	Aquilapollenites pyriformis	22	122	Angiosperm	1	Camp	1	Jarzen, 1982	11	NULL	Dinosaur Park	16	59.4817	-76.5069	59.5952	-78.812	58.6799	-81.7717	50.7595	-111.482	76.35	0.55	75	temperate lowland forest	2	2. temperate lowland forest	NULL
	Magnoliopsida	13	Santalales?	66	Santalaceae?	90	Aquilapollenites quadrilobus	22	124	Angiosperm	1	Camp	1	Jarzen, 1982	11	NULL	Dinosaur Park	16	59.4817	-76.5069	59.5952	-78.812	58.6799	-81.7717	50.7595	-111.482	76.35	0.55	75	temperate lowland forest	2	2. temperate lowland forest	NULL
	Magnoliopsida	13	Santalales?	66	Santalaceae?	90	Aquilapollenites reticulatus	22	127	Angiosperm	1	Camp	1	Jarzen, 1982	11	NULL	Dinosaur Park	16	59.4817	-76.5069	59.5952	-78.812	58.6799	-81.7717	50.7595	-111.482	76.35	0.55	75	temperate lowland forest	2	2. temperate lowland forest	NULL
	Magnoliopsida	13	Santalales?	66	Santalaceae?	90	Aquilapollenites trialatus	22	139	Angiosperm	1	Camp	1	Jarzen, 1982	11	NULL	Dinosaur Park	16	59.4817	-76.5069	59.5952	-78.812	58.6799	-81.7717	50.7595	-111.482	76.35	0.55	75	temperate lowland forest	2	2. temperate lowland forest	NULL
	Magnoliopsida	13	Santalales?	66	Santalaceae?	90	Aquilapollenites tripodiformis	22	140	Angiosperm	1	Camp	1	Jarzen, 1982	11	NULL	Dinosaur Park	16	59.4817	-76.5069	59.5952	-78.812	58.6799	-81.7717	50.7595	-111.482	76.35	0.55	75	temperate lowland forest	2	2. temperate lowland forest	NULL
	Magnoliopsida	13	Santalales?	66	Santalaceae?	90	Aquilapollenites turbidus	22	141	Angiosperm	1	Camp	1	Jarzen, 1982	11	NULL	Dinosaur Park	16	59.4817	-76.5069	59.5952	-78.812	58.6799	-81.7717	50.7595	-111.482	76.35	0.55	75	temperate lowland forest	2	2. temperate lowland forest	NULL
	Polypodiopsida	18	uncertain	80	uncertain	105	Baculatisporites comaumensis	30	181	Fern/Moss	2	Camp	1	Jarzen, 1982	11	NULL	Dinosaur Park	16	59.4817	-76.5069	59.5952	-78.812	58.6799	-81.7717	50.7595	-111.482	76.35	0.55	75	coastal plain	4	4. coastal plain	NULL
	Magnoliopsida	13	Proteales	61	Proteaceae	84	Beaupreaidites angulatus	32	195	Angiosperm	1	Camp	1	Jarzen, 1982	11	NULL	Dinosaur Park	16	59.4817	-76.5069	59.5952	-78.812	58.6799	-81.7717	50.7595	-111.482	76.35	0.55	75	coastal plain	4	4. coastal plain	NULL
	Magnoliopsida	13	Proteales	61	Proteaceae	84	Beaupreaidites occulatus	32	197	Angiosperm	1	Camp	1	Jarzen, 1982	11	NULL	Dinosaur Park	16	59.4817	-76.5069	59.5952	-78.812	58.6799	-81.7717	50.7595	-111.482	76.35	0.55	75	coastal plain	4	4. coastal plain	NULL
	Pinopsida	16	uncertain	80	uncertain	105	Cedripites cretaceus	51	236	Gymnosperm	3	Camp	1	Jarzen, 1982	11	NULL	Dinosaur Park	16	59.4817	-76.5069	59.5952	-78.812	58.6799	-81.7717	50.7595	-111.482	76.35	0.55	75	upland forest	1	1. upland forest	NULL
	Magnoliopsida	13	Saxifragales?	70	Cercidiphyllaceae?	24	Cercidiphyllites brevicolpatus	53	246	Angiosperm	1	Camp	1	Jarzen, 1982	11	NULL	Dinosaur Park	16	59.4817	-76.5069	59.5952	-78.812	58.6799	-81.7717	50.7595	-111.482	76.35	0.55	75	coastal plain	4	4. coastal plain	NULL
	Polypodiopsida	18	Schizaeales	71	Schizaeaceae	93	Cicatricosisporites hallei	58	264	Fern/Moss	2	Camp	1	Jarzen, 1982	11	NULL	Dinosaur Park	16	59.4817	-76.5069	59.5952	-78.812	58.6799	-81.7717	50.7595	-111.482	76.35	0.55	75	temperate lowland forest	2	2. temperate lowland forest	NULL
	Bryopsida	3	uncertain	80	uncertain	105	Cingutriletes clavus	61	288	Fern/Moss	2	Camp	1	Jarzen, 1982	11	NULL	Dinosaur Park	16	59.4817	-76.5069	59.5952	-78.812	58.6799	-81.7717	50.7595	-111.482	76.35	0.55	75	coastal plain	4	4. coastal plain	NULL
	Magnoliopsida	13	Santalales?	66	Loranthaceae?	60	Cranwellia striata	78	329	Angiosperm	1	Camp	1	Jarzen, 1982	11	NULL	Dinosaur Park	16	59.4817	-76.5069	59.5952	-78.812	58.6799	-81.7717	50.7595	-111.482	76.35	0.55	75	temperate lowland forest	2	2. temperate lowland forest	NULL
	Polypodiopsida	18	Cyatheales?	17	Cyatheaceae?	32	Cyathidites australis	82	345	Fern/Moss	2	Camp	1	Jarzen, 1982	11	NULL	Dinosaur Park	16	59.4817	-76.5069	59.5952	-78.812	58.6799	-81.7717	50.7595	-111.482	76.35	0.55	75	temperate lowland forest	2	2. temperate lowland forest	NULL
	Polypodiopsida	18	Cyatheales?	17	Cyatheaceae?	32	Cyathidites minor	82	349	Fern/Moss	2	Camp	1	Jarzen, 1982	11	NULL	Dinosaur Park	16	59.4817	-76.5069	59.5952	-78.812	58.6799	-81.7717	50.7595	-111.482	76.35	0.55	75	temperate lowland forest	2	2. temperate lowland forest	NULL
	Cycadopsida	5	Cycadales	18	Cycadaceae	33	Cycadophytus nitidus	83	354	Gymnosperm	3	Camp	1	Jarzen, 1982	11	NULL	Dinosaur Park	16	59.4817	-76.5069	59.5952	-78.812	58.6799	-81.7717	50.7595	-111.482	76.35	0.55	75	tropical lowland forest	6	6. tropical lowland forest	NULL
	Polypodiopsida	18	Equisetales	22	Equisetaceae	39	Equisetosporites multicostatus	106	414	Fern/Moss	2	Camp	1	Jarzen, 1982	11	NULL	Dinosaur Park	16	59.4817	-76.5069	59.5952	-78.812	58.6799	-81.7717	50.7595	-111.482	76.35	0.55	75	open scrubland	8	8. open scrubland	NULL
	Magnoliopsida	13	Buxales	8	Buxaceae	20	Erdtmanipollis procumbentiformis	107	423	Angiosperm	1	Camp	1	Jarzen, 1982	11	NULL	Dinosaur Park	16	59.4817	-76.5069	59.5952	-78.812	58.6799	-81.7717	50.7595	-111.482	76.35	0.55	75	temperate lowland forest	2	2. temperate lowland forest	NULL
	Bryopsida?	4	uncertain	80	uncertain	105	Foraminisporis wonthaggiensis	116	445	Fern/Moss	2	Camp	1	Jarzen, 1982	11	NULL	Dinosaur Park	16	59.4817	-76.5069	59.5952	-78.812	58.6799	-81.7717	50.7595	-111.482	76.35	0.55	75	coastal plain	4	4. coastal plain	NULL
	Polypodiopsida	18	Gleicheniales	30	Gleicheniaceae	49	Gleicheniidites senonicus	128	482	Fern/Moss	2	Camp	1	Jarzen, 1982	11	NULL	Dinosaur Park	16	59.4817	-76.5069	59.5952	-78.812	58.6799	-81.7717	50.7595	-111.482	76.35	0.55	75	swampy, lagoonal	3	3. swampy, lagoonal	NULL
	Lycopodiopsida	12	Selaginellales	73	Selaginellaceae	95	Heliosporites kemensis	140	508	Fern/Moss	2	Camp	1	Jarzen, 1982	11	NULL	Dinosaur Park	16	59.4817	-76.5069	59.5952	-78.812	58.6799	-81.7717	50.7595	-111.482	76.35	0.55	75	temperate lowland forest	2	2. temperate lowland forest	NULL
	Polypodiopsida	18	uncertain	80	uncertain	105	Laevigatosporites discordatus	158	562	Fern/Moss	2	Camp	1	Jarzen, 1982	11	NULL	Dinosaur Park	16	59.4817	-76.5069	59.5952	-78.812	58.6799	-81.7717	50.7595	-111.482	76.35	0.55	75	coastal plain	4	4. coastal plain	NULL
	Polypodiopsida	18	uncertain	80	uncertain	105	Laevigatosporites druggii	158	563	Fern/Moss	2	Camp	1	Jarzen, 1982	11	NULL	Dinosaur Park	16	59.4817	-76.5069	59.5952	-78.812	58.6799	-81.7717	50.7595	-111.482	76.35	0.55	75	coastal plain	4	4. coastal plain	NULL
	Polypodiopsida	18	uncertain	80	uncertain	105	Laevigatosporites ovatus	158	567	Fern/Moss	2	Camp	1	Jarzen, 1982	11	NULL	Dinosaur Park	16	59.4817	-76.5069	59.5952	-78.812	58.6799	-81.7717	50.7595	-111.482	76.35	0.55	75	coastal plain	4	4. coastal plain	NULL
	Liliopsida	10	Liliales	34	uncertain	105	Liliacidites mirus	168	596	Angiosperm	1	Camp	1	Jarzen, 1982	11	NULL	Dinosaur Park	16	59.4817	-76.5069	59.5952	-78.812	58.6799	-81.7717	50.7595	-111.482	76.35	0.55	75	temperate lowland forest	2	2. temperate lowland forest	NULL
	Liliopsida	10	Liliales	34	uncertain	105	Liliacidites morrinensis	168	597	Angiosperm	1	Camp	1	Jarzen, 1982	11	NULL	Dinosaur Park	16	59.4817	-76.5069	59.5952	-78.812	58.6799	-81.7717	50.7595	-111.482	76.35	0.55	75	temperate lowland forest	2	2. temperate lowland forest	NULL
	Liliopsida	10	Liliales	34	uncertain	105	Liliacidites variegatus	168	600	Angiosperm	1	Camp	1	Jarzen, 1982	11	NULL	Dinosaur Park	16	59.4817	-76.5069	59.5952	-78.812	58.6799	-81.7717	50.7595	-111.482	76.35	0.55	75	temperate lowland forest	2	2. temperate lowland forest	NULL
	Magnoliopsida	13	Santalales	65	Loranthaceae	59	Loranthacites catteralli	171	603	Angiosperm	1	Camp	1	Jarzen, 1982	11	NULL	Dinosaur Park	16	59.4817	-76.5069	59.5952	-78.812	58.6799	-81.7717	50.7595	-111.482	76.35	0.55	75	tropical lowland forest	6	6. tropical lowland forest	NULL
	Pinopsida	16	Pinales	54	Podocarpaceae	79	Lygistepollenites sp.	176	623	Gymnosperm	3	Camp	1	Jarzen, 1982	11	NULL	Dinosaur Park	16	59.4817	-76.5069	59.5952	-78.812	58.6799	-81.7717	50.7595	-111.482	76.35	0.55	75	temperate lowland forest	2	2. temperate lowland forest	NULL
	Lycopodiopsida	12	Selaginellales	73	Selaginellaceae	95	Neoraistrickia truncatus	204	702	Fern/Moss	2	Camp	1	Jarzen, 1982	11	NULL	Dinosaur Park	16	59.4817	-76.5069	59.5952	-78.812	58.6799	-81.7717	50.7595	-111.482	76.35	0.55	75	tropical lowland forest	6	6. tropical lowland forest	NULL
	Polypodiopsida	18	Osmundales	51	Osmundaceae	74	Osmundacidites wellmanii	215	723	Fern/Moss	2	Camp	1	Jarzen, 1982	11	NULL	Dinosaur Park	16	59.4817	-76.5069	59.5952	-78.812	58.6799	-81.7717	50.7595	-111.482	76.35	0.55	75	temperate lowland forest	2	2. temperate lowland forest	NULL
	Pinopsida	16	Pinales	54	Podocarpaceae	79	Parvisaccites radiatus	225	738	Gymnosperm	3	Camp	1	Jarzen, 1982	11	NULL	Dinosaur Park	16	59.4817	-76.5069	59.5952	-78.812	58.6799	-81.7717	50.7595	-111.482	76.35	0.55	75	temperate lowland forest	2	2. temperate lowland forest	NULL
	Ginkgoopsida?	7	uncertain	80	uncertain	105	Pityosporites sp.	243	773	Gymnosperm	3	Camp	1	Jarzen, 1982	11	NULL	Dinosaur Park	16	59.4817	-76.5069	59.5952	-78.812	58.6799	-81.7717	50.7595	-111.482	76.35	0.55	75	coastal plain	4	4. coastal plain	NULL
	Pinopsida	16	Pinales	54	Podocarpaceae	79	Podocarpidites granulatus	248	786	Gymnosperm	3	Camp	1	Jarzen, 1982	11	NULL	Dinosaur Park	16	59.4817	-76.5069	59.5952	-78.812	58.6799	-81.7717	50.7595	-111.482	76.35	0.55	75	temperate lowland forest	2	2. temperate lowland forest	NULL
	Polypodiopsida	18	Polypodiales	59	uncertain	105	Polypodiisporites amplus	255	812	Fern/Moss	2	Camp	1	Jarzen, 1982	11	NULL	Dinosaur Park	16	59.4817	-76.5069	59.5952	-78.812	58.6799	-81.7717	50.7595	-111.482	76.35	0.55	75	temperate lowland forest	2	2. temperate lowland forest	NULL
	Magnoliopsida	13	Proteales	61	uncertain	105	Proteacidites thalmanii	262	835	Angiosperm	1	Camp	1	Jarzen, 1982	11	NULL	Dinosaur Park	16	59.4817	-76.5069	59.5952	-78.812	58.6799	-81.7717	50.7595	-111.482	76.35	0.55	75	unknown	0	0. unknown	NULL
	uncertain	23	uncertain	80	uncertain	105	Pulcheripollenites narcissus	272	852	Angiosperm	1	Camp	1	Jarzen, 1982	11	NULL	Dinosaur Park	16	59.4817	-76.5069	59.5952	-78.812	58.6799	-81.7717	50.7595	-111.482	76.35	0.55	75	swampy, lagoonal	3	3. swampy, lagoonal	NULL
	Lycopodiopsida	12	Lycopodiales	36	Lycopodiaceae	61	Retitriletes austroclavatidites	291	888	Fern/Moss	2	Camp	1	Jarzen, 1982	11	NULL	Dinosaur Park	16	59.4817	-76.5069	59.5952	-78.812	58.6799	-81.7717	50.7595	-111.482	76.35	0.55	75	upland forest	1	1. upland forest	NULL
	Lycopodiopsida	12	Lycopodiales	36	Lycopodiaceae	61	Retitriletes nidus	291	895	Fern/Moss	2	Camp	1	Jarzen, 1982	11	NULL	Dinosaur Park	16	59.4817	-76.5069	59.5952	-78.812	58.6799	-81.7717	50.7595	-111.482	76.35	0.55	75	upland forest	1	1. upland forest	NULL
	Bryopsida	3	uncertain	80	uncertain	105	Stereisporites antiquasporites	329	987	Fern/Moss	2	Camp	1	Jarzen, 1982	11	NULL	Dinosaur Park	16	59.4817	-76.5069	59.5952	-78.812	58.6799	-81.7717	50.7595	-111.482	76.35	0.55	75	coastal plain	4	4. coastal plain	NULL
	Magnoliopsida	13	Ericales	24	Symplocaceae	100	Symplocoipollenites vestibulum	337	1007	Angiosperm	1	Camp	1	Jarzen, 1982	11	NULL	Dinosaur Park	16	59.4817	-76.5069	59.5952	-78.812	58.6799	-81.7717	50.7595	-111.482	76.35	0.55	75	tropical lowland forest	6	6. tropical lowland forest	NULL
	Pinopsida	16	Pinales	54	Cupressaceae?	30	Taxodiaceaepollenites hiatus	343	1015	Gymnosperm	3	Camp	1	Jarzen, 1982	11	NULL	Dinosaur Park	16	59.4817	-76.5069	59.5952	-78.812	58.6799	-81.7717	50.7595	-111.482	76.35	0.55	75	temperate lowland forest	2	2. temperate lowland forest	NULL
	Magnoliopsida	13	Magnoliales?	39	uncertain	105	Tricolpites reticulatus	358	1076	Angiosperm	1	Camp	1	Jarzen, 1982	11	NULL	Dinosaur Park	16	59.4817	-76.5069	59.5952	-78.812	58.6799	-81.7717	50.7595	-111.482	76.35	0.55	75	coastal plain	4	4. coastal plain	NULL
	Pteridospermatopsida?	21	Caytoniales?	11	Caytoniaceae?	22	Vitreisporites pallidus	393	1186	Gymnosperm	3	Camp	1	Jarzen, 1982	11	NULL	Dinosaur Park	16	59.4817	-76.5069	59.5952	-78.812	58.6799	-81.7717	50.7595	-111.482	76.35	0.55	75	temperate lowland forest	2	2. temperate lowland forest	NULL
	Polypodiopsida	18	uncertain	80	uncertain	105	Deltoidospora spp.	86	369	Fern/Moss	2	Camp	1	May, 1972	15	NULL	Straight Cliffs Sandstone	39	47.0864	-84.4292	47.131	-86.3193	46.1511	-88.6652	37.6813	-111.643	80.15	3.85	80	temperate lowland forest	2	2. temperate lowland forest	NULL
	Polypodiopsida	18	uncertain	80	uncertain	105	Laevigatosporites sp.	158	569	Fern/Moss	2	Camp	1	May, 1972	15	NULL	Straight Cliffs Sandstone	39	47.0864	-84.4292	47.131	-86.3193	46.1511	-88.6652	37.6813	-111.643	80.15	3.85	80	coastal plain	4	4. coastal plain	NULL
	Liliopsida	10	Arecales	6	Arecaceae	11	Palmaepollenites sp.	220	730	Angiosperm	1	Camp	1	May, 1972	15	NULL	Straight Cliffs Sandstone	39	47.0864	-84.4292	47.131	-86.3193	46.1511	-88.6652	37.6813	-111.643	80.15	3.85	80	tropical lowland forest	6	6. tropical lowland forest	NULL
	Magnoliopsida	13	uncertain	80	uncertain	105	Proteacidites sp.	262	832	Angiosperm	1	Camp	1	May, 1972	15	NULL	Straight Cliffs Sandstone	39	47.0864	-84.4292	47.131	-86.3193	46.1511	-88.6652	37.6813	-111.643	80.15	3.85	80	unknown	0	0. unknown	NULL
	Magnoliopsida	13	Magnoliales?	39	uncertain	105	Retitricolpites sp.	290	884	Angiosperm	1	Camp	1	May, 1972	15	NULL	Straight Cliffs Sandstone	39	47.0864	-84.4292	47.131	-86.3193	46.1511	-88.6652	37.6813	-111.643	80.15	3.85	80	coastal plain	4	4. coastal plain	NULL
	Magnoliopsida	13	Ericales	24	Primulaceae	83	Stephanocolpites sp.	327	984	Angiosperm	1	Camp	1	May, 1972	15	NULL	Straight Cliffs Sandstone	39	47.0864	-84.4292	47.131	-86.3193	46.1511	-88.6652	37.6813	-111.643	80.15	3.85	80	tropical lowland forest	6	6. tropical lowland forest	NULL
	Magnoliopsida	13	Magnoliales?	39	uncertain	105	Tricolpites spp.	358	1079	Angiosperm	1	Camp	1	May, 1972	15	NULL	Straight Cliffs Sandstone	39	47.0864	-84.4292	47.131	-86.3193	46.1511	-88.6652	37.6813	-111.643	80.15	3.85	80	coastal plain	4	4. coastal plain	NULL
	Magnoliopsida	13	Proteales	61	Proteaceae	84	Triporopollenites spp.	370	1140	Angiosperm	1	Camp	1	May, 1972	15	NULL	Straight Cliffs Sandstone	39	47.0864	-84.4292	47.131	-86.3193	46.1511	-88.6652	37.6813	-111.643	80.15	3.85	80	coastal plain	4	4. coastal plain	NULL
	Polypodiopsida?	19	uncertain	80	uncertain	105	Concavisporites sp.	70	310	Fern/Moss	2	Camp	1	May, 1972	15	NULL	Blackhawk 1 (Emery Coal Field)	5	48.0153	-83.7808	48.0645	-85.6851	47.0884	-88.0545	38.6895	-111.395	82.3	1.3	80	coastal plain	4	4. coastal plain	NULL
	Magnoliopsida	13	Fagales?	29	Juglandaceae?	56	Extratriporopollenites sp.	114	439	Angiosperm	1	Camp	1	May, 1972	15	NULL	Blackhawk 1 (Emery Coal Field)	5	48.0153	-83.7808	48.0645	-85.6851	47.0884	-88.0545	38.6895	-111.395	82.3	1.3	80	swampy, lagoonal	3	3. swampy, lagoonal	NULL
	Magnoliopsida	13	Fagales	28	Juglandaceae?	56	Latipollis spp.	160	574	Angiosperm	1	Camp	1	May, 1972	15	NULL	Blackhawk 1 (Emery Coal Field)	5	48.0153	-83.7808	48.0645	-85.6851	47.0884	-88.0545	38.6895	-111.395	82.3	1.3	80	swampy, lagoonal	3	3. swampy, lagoonal	NULL
	uncertain	23	uncertain	80	uncertain	105	Monosulcites spp.	194	688	Angiosperm	1	Camp	1	May, 1972	15	NULL	Blackhawk 1 (Emery Coal Field)	5	48.0153	-83.7808	48.0645	-85.6851	47.0884	-88.0545	38.6895	-111.395	82.3	1.3	80	coastal plain	4	4. coastal plain	NULL
	uncertain	23	uncertain	80	uncertain	105	Toroispora sp.	353	1035	Fern/Moss	2	Camp	1	May, 1972	15	NULL	Blackhawk 1 (Emery Coal Field)	5	48.0153	-83.7808	48.0645	-85.6851	47.0884	-88.0545	38.6895	-111.395	82.3	1.3	80	coastal plain	4	4. coastal plain	NULL
	Magnoliopsida	13	Magnoliales?	39	uncertain	105	Tricolpites spp.	358	1079	Angiosperm	1	Camp	1	May, 1972	15	NULL	Blackhawk 1 (Emery Coal Field)	5	48.0153	-83.7808	48.0645	-85.6851	47.0884	-88.0545	38.6895	-111.395	82.3	1.3	80	coastal plain	4	4. coastal plain	NULL
	Magnoliopsida	13	Proteales	61	Proteaceae	84	Triporopollenites sp.	370	1139	Angiosperm	1	Camp	1	May, 1972	15	NULL	Blackhawk 1 (Emery Coal Field)	5	48.0153	-83.7808	48.0645	-85.6851	47.0884	-88.0545	38.6895	-111.395	82.3	1.3	80	coastal plain	4	4. coastal plain	NULL
	Magnoliopsida	13	Proteales	61	Proteaceae	84	Triporopollenites sp.	370	1139	Angiosperm	1	Camp	1	May, 1972	15	NULL	Blackhawk 1 (Emery Coal Field)	5	48.0153	-83.7808	48.0645	-85.6851	47.0884	-88.0545	38.6895	-111.395	82.3	1.3	80	coastal plain	4	4. coastal plain	NULL
	Magnoliopsida	13	Proteales	61	Proteaceae	84	Triporopollenites spp.	370	1140	Angiosperm	1	Camp	1	May, 1972	15	NULL	Blackhawk 1 (Emery Coal Field)	5	48.0153	-83.7808	48.0645	-85.6851	47.0884	-88.0545	38.6895	-111.395	82.3	1.3	80	coastal plain	4	4. coastal plain	NULL
	Polypodiopsida?	19	uncertain	80	uncertain	105	Concavisporites sp.	70	310	Fern/Moss	2	Camp	1	May, 1972	15	NULL	Blackhawk Fm. 2 (Salina)	6	48.2528	-83.9723	48.3006	-85.8806	47.3233	-88.2495	38.8875	-111.63	82.3	1.3	80	coastal plain	4	4. coastal plain	NULL
	Pinopsida	16	Pinales?	55	uncertain	105	Conifer pollen type	74	317	Gymnosperm	3	Camp	1	May, 1972	15	NULL	Blackhawk Fm. 2 (Salina)	6	48.2528	-83.9723	48.3006	-85.8806	47.3233	-88.2495	38.8875	-111.63	82.3	1.3	80	unknown	0	0. unknown	NULL
	Polypodiopsida	18	uncertain	80	uncertain	105	Deltoidospora sp.	86	368	Fern/Moss	2	Camp	1	May, 1972	15	NULL	Blackhawk Fm. 2 (Salina)	6	48.2528	-83.9723	48.3006	-85.8806	47.3233	-88.2495	38.8875	-111.63	82.3	1.3	80	temperate lowland forest	2	2. temperate lowland forest	NULL
	Cycadopsida	5	Cycadales	18	uncertain	105	Eucommiidites sp.	110	433	Gymnosperm	3	Camp	1	May, 1972	15	NULL	Blackhawk Fm. 2 (Salina)	6	48.2528	-83.9723	48.3006	-85.8806	47.3233	-88.2495	38.8875	-111.63	82.3	1.3	80	coastal plain	4	4. coastal plain	NULL
	Magnoliopsida	13	Fagales?	29	Juglandaceae?	56	Extratriporopollenites sp.	114	439	Angiosperm	1	Camp	1	May, 1972	15	NULL	Blackhawk Fm. 2 (Salina)	6	48.2528	-83.9723	48.3006	-85.8806	47.3233	-88.2495	38.8875	-111.63	82.3	1.3	80	swampy, lagoonal	3	3. swampy, lagoonal	NULL
	Polypodiopsida	18	uncertain	80	uncertain	105	Laevigatosporites psilatus	158	568	Fern/Moss	2	Camp	1	May, 1972	15	NULL	Blackhawk Fm. 2 (Salina)	6	48.2528	-83.9723	48.3006	-85.8806	47.3233	-88.2495	38.8875	-111.63	82.3	1.3	80	coastal plain	4	4. coastal plain	NULL
	Magnoliopsida	13	Fagales	28	Juglandaceae	55	Latipollis sp.	160	573	Angiosperm	1	Camp	1	May, 1972	15	NULL	Blackhawk Fm. 2 (Salina)	6	48.2528	-83.9723	48.3006	-85.8806	47.3233	-88.2495	38.8875	-111.63	82.3	1.3	80	swampy, lagoonal	3	3. swampy, lagoonal	NULL
	Magnoliopsida	13	Fagales	28	Juglandaceae	55	Latipollis spp.	160	574	Angiosperm	1	Camp	1	May, 1972	15	NULL	Blackhawk Fm. 2 (Salina)	6	48.2528	-83.9723	48.3006	-85.8806	47.3233	-88.2495	38.8875	-111.63	82.3	1.3	80	swampy, lagoonal	3	3. swampy, lagoonal	NULL
	Polypodiopsida?	19	uncertain	80	uncertain	105	Leiotriletes sp.	161	576	Fern/Moss	2	Camp	1	May, 1972	15	NULL	Blackhawk Fm. 2 (Salina)	6	48.2528	-83.9723	48.3006	-85.8806	47.3233	-88.2495	38.8875	-111.63	82.3	1.3	80	swampy, lagoonal	3	3. swampy, lagoonal	NULL
	Polypodiopsida	18	Cyatheales?	17	Dicksoniaceae	35	Matonisporites sp.	185	657	Fern/Moss	2	Camp	1	May, 1972	15	NULL	Blackhawk Fm. 2 (Salina)	6	48.2528	-83.9723	48.3006	-85.8806	47.3233	-88.2495	38.8875	-111.63	82.3	1.3	80	temperate lowland forest	2	2. temperate lowland forest	NULL
	Magnoliopsida	13	Fagales?	29	Juglandaceae?	56	Nudopollis sp.	208	706	Angiosperm	1	Camp	1	May, 1972	15	NULL	Blackhawk Fm. 2 (Salina)	6	48.2528	-83.9723	48.3006	-85.8806	47.3233	-88.2495	38.8875	-111.63	82.3	1.3	80	temperate lowland forest	2	2. temperate lowland forest	NULL
	Pteridospermatopsida	20	Peltaspermales	53	uncertain	105	Piceaepollenites sp.	237	755	Gymnosperm	3	Camp	1	May, 1972	15	NULL	Blackhawk Fm. 2 (Salina)	6	48.2528	-83.9723	48.3006	-85.8806	47.3233	-88.2495	38.8875	-111.63	82.3	1.3	80	upland forest	1	1. upland forest	NULL
	Magnoliopsida	13	Proteales	61	uncertain	105	Proteacidites sp.	262	832	Angiosperm	1	Camp	1	May, 1972	15	NULL	Blackhawk Fm. 2 (Salina)	6	48.2528	-83.9723	48.3006	-85.8806	47.3233	-88.2495	38.8875	-111.63	82.3	1.3	80	unknown	0	0. unknown	NULL
	Polypodiopsida	18	uncertain	80	uncertain	105	Punctatisporites sp.	273	853	Fern/Moss	2	Camp	1	May, 1972	15	NULL	Blackhawk Fm. 2 (Salina)	6	48.2528	-83.9723	48.3006	-85.8806	47.3233	-88.2495	38.8875	-111.63	82.3	1.3	80	swampy, lagoonal	3	3. swampy, lagoonal	NULL
	Magnoliopsida	13	Magnoliales?	39	uncertain	105	Retitricolpites spp.	290	885	Angiosperm	1	Camp	1	May, 1972	15	NULL	Blackhawk Fm. 2 (Salina)	6	48.2528	-83.9723	48.3006	-85.8806	47.3233	-88.2495	38.8875	-111.63	82.3	1.3	80	coastal plain	4	4. coastal plain	NULL
	Magnoliopsida	13	Magnoliales?	39	uncertain	105	Tricolpites spp.	358	1079	Angiosperm	1	Camp	1	May, 1972	15	NULL	Blackhawk Fm. 2 (Salina)	6	48.2528	-83.9723	48.3006	-85.8806	47.3233	-88.2495	38.8875	-111.63	82.3	1.3	80	coastal plain	4	4. coastal plain	NULL
	Magnoliopsida	13	Malpighiales	40	Euphorbiaceae	43	Tricolporopollenites sp.	362	1112	Angiosperm	1	Camp	1	May, 1972	15	NULL	Blackhawk Fm. 2 (Salina)	6	48.2528	-83.9723	48.3006	-85.8806	47.3233	-88.2495	38.8875	-111.63	82.3	1.3	80	temperate lowland forest	2	2. temperate lowland forest	NULL
	Magnoliopsida	13	Proteales	61	Proteaceae	84	Triporopollenites sp.	370	1139	Angiosperm	1	Camp	1	May, 1972	15	NULL	Blackhawk Fm. 2 (Salina)	6	48.2528	-83.9723	48.3006	-85.8806	47.3233	-88.2495	38.8875	-111.63	82.3	1.3	80	coastal plain	4	4. coastal plain	NULL
	Magnoliopsida	13	Proteales	61	Proteaceae	84	Triporopollenites spp.	370	1140	Angiosperm	1	Camp	1	May, 1972	15	NULL	Blackhawk Fm. 2 (Salina)	6	48.2528	-83.9723	48.3006	-85.8806	47.3233	-88.2495	38.8875	-111.63	82.3	1.3	80	coastal plain	4	4. coastal plain	NULL
	Polypodiopsida?	19	uncertain	80	uncertain	105	Concavisporites sp.	70	310	Fern/Moss	2	Camp	1	May, 1972	15	NULL	Sixmile Canyon	38	48.5803	-83.9213	48.6284	-85.835	47.6514	-88.2091	39.213	-111.694	88.3	4.7	80	coastal plain	4	4. coastal plain	NULL
	Polypodiopsida	18	uncertain	80	uncertain	105	Deltoidospora sp.	86	368	Fern/Moss	2	Camp	1	May, 1972	15	NULL	Sixmile Canyon	38	48.5803	-83.9213	48.6284	-85.835	47.6514	-88.2091	39.213	-111.694	88.3	4.7	80	temperate lowland forest	2	2. temperate lowland forest	NULL
	Polypodiopsida	18	Cyatheales	16	Cyatheaceae	31	Kuylisporites sp.	157	556	Fern/Moss	2	Camp	1	May, 1972	15	NULL	Sixmile Canyon	38	48.5803	-83.9213	48.6284	-85.835	47.6514	-88.2091	39.213	-111.694	88.3	4.7	80	tropical lowland forest	6	6. tropical lowland forest	NULL
	Polypodiopsida	18	uncertain	80	uncertain	105	Laevigatosporites psilatus	158	568	Fern/Moss	2	Camp	1	May, 1972	15	NULL	Sixmile Canyon	38	48.5803	-83.9213	48.6284	-85.835	47.6514	-88.2091	39.213	-111.694	88.3	4.7	80	coastal plain	4	4. coastal plain	NULL
	Magnoliopsida	13	Fagales	28	Juglandaceae	55	Latipollis spp.	160	574	Angiosperm	1	Camp	1	May, 1972	15	NULL	Sixmile Canyon	38	48.5803	-83.9213	48.6284	-85.835	47.6514	-88.2091	39.213	-111.694	88.3	4.7	80	swampy, lagoonal	3	3. swampy, lagoonal	NULL
	Magnoliopsida	13	Proteales	61	uncertain	105	Proteacidites spp.	262	833	Angiosperm	1	Camp	1	May, 1972	15	NULL	Sixmile Canyon	38	48.5803	-83.9213	48.6284	-85.835	47.6514	-88.2091	39.213	-111.694	88.3	4.7	80	unknown	0	0. unknown	NULL
	Magnoliopsida	13	Fagales?	29	Juglandaceae?	56	Sporopollis sp.	324	975	Angiosperm	1	Camp	1	May, 1972	15	NULL	Sixmile Canyon	38	48.5803	-83.9213	48.6284	-85.835	47.6514	-88.2091	39.213	-111.694	88.3	4.7	80	wet, successional	5	5. wet, successional	NULL
	uncertain	23	uncertain	80	uncertain	105	Toroispora sp.	353	1035	Fern/Moss	2	Camp	1	May, 1972	15	NULL	Sixmile Canyon	38	48.5803	-83.9213	48.6284	-85.835	47.6514	-88.2091	39.213	-111.694	88.3	4.7	80	coastal plain	4	4. coastal plain	NULL
	Magnoliopsida	13	Magnoliales?	39	uncertain	105	Tricolpites spp.	358	1079	Angiosperm	1	Camp	1	May, 1972	15	NULL	Sixmile Canyon	38	48.5803	-83.9213	48.6284	-85.835	47.6514	-88.2091	39.213	-111.694	88.3	4.7	80	coastal plain	4	4. coastal plain	NULL
	Magnoliopsida	13	Malpighiales	40	Euphorbiaceae	43	Tricolporopollenites sp.	362	1112	Angiosperm	1	Camp	1	May, 1972	15	NULL	Sixmile Canyon	38	48.5803	-83.9213	48.6284	-85.835	47.6514	-88.2091	39.213	-111.694	88.3	4.7	80	temperate lowland forest	2	2. temperate lowland forest	NULL
	Magnoliopsida	13	Proteales	61	Proteaceae	84	Triporopollenites sp.	370	1139	Angiosperm	1	Camp	1	May, 1972	15	NULL	Sixmile Canyon	38	48.5803	-83.9213	48.6284	-85.835	47.6514	-88.2091	39.213	-111.694	88.3	4.7	80	coastal plain	4	4. coastal plain	NULL
	Polypodiopsida	18	Polypodiales	59	Polypodiaceae	81	Verrucosisporites sp.	386	1177	Fern/Moss	2	Camp	1	May, 1972	15	NULL	Sixmile Canyon	38	48.5803	-83.9213	48.6284	-85.835	47.6514	-88.2091	39.213	-111.694	88.3	4.7	80	tropical lowland forest	6	6. tropical lowland forest	NULL
	Pinopsida	16	Pinales	54	Pinaceae	76	Abietineaepollenites sp.	2	4	Gymnosperm	3	Camp	1	May, 1972	15	NULL	Blackhawk Fm. 5 (Wasatch Plateau)	9	48.8129	-83.1529	48.8665	-85.0696	47.8941	-87.4615	39.5664	-111.135	82.3	1.3	80	upland forest	1	1. upland forest	NULL
	Cycadopsida	5	Cycadales?	19	uncertain	105	Cycadopites sp.	84	361	Gymnosperm	3	Camp	1	May, 1972	15	NULL	Blackhawk Fm. 5 (Wasatch Plateau)	9	48.8129	-83.1529	48.8665	-85.0696	47.8941	-87.4615	39.5664	-111.135	82.3	1.3	80	tropical lowland forest	6	6. tropical lowland forest	NULL
	Magnoliopsida	13	Fagales	28	Juglandaceae	55	Latipollis spp.	160	574	Angiosperm	1	Camp	1	May, 1972	15	NULL	Blackhawk Fm. 5 (Wasatch Plateau)	9	48.8129	-83.1529	48.8665	-85.0696	47.8941	-87.4615	39.5664	-111.135	82.3	1.3	80	swampy, lagoonal	3	3. swampy, lagoonal	NULL
	Magnoliopsida	13	Saxifragales	69	Altingiaceae	1	Liquidamber sp.	170	602	Angiosperm	1	Camp	1	May, 1972	15	NULL	Blackhawk Fm. 5 (Wasatch Plateau)	9	48.8129	-83.1529	48.8665	-85.0696	47.8941	-87.4615	39.5664	-111.135	82.3	1.3	80	temperate lowland forest	2	2. temperate lowland forest	NULL
	Magnoliopsida	13	Fagales?	29	Juglandaceae?	56	Nudopollis sp.	208	706	Angiosperm	1	Camp	1	May, 1972	15	NULL	Blackhawk Fm. 5 (Wasatch Plateau)	9	48.8129	-83.1529	48.8665	-85.0696	47.8941	-87.4615	39.5664	-111.135	82.3	1.3	80	temperate lowland forest	2	2. temperate lowland forest	NULL
	Magnoliopsida	13	Proteales	61	uncertain	105	Proteacidites sp.	262	832	Angiosperm	1	Camp	1	May, 1972	15	NULL	Blackhawk Fm. 5 (Wasatch Plateau)	9	48.8129	-83.1529	48.8665	-85.0696	47.8941	-87.4615	39.5664	-111.135	82.3	1.3	80	unknown	0	0. unknown	NULL
	Magnoliopsida	13	Magnoliales?	39	uncertain	105	Retitricolpites sp.	290	884	Angiosperm	1	Camp	1	May, 1972	15	NULL	Blackhawk Fm. 5 (Wasatch Plateau)	9	48.8129	-83.1529	48.8665	-85.0696	47.8941	-87.4615	39.5664	-111.135	82.3	1.3	80	coastal plain	4	4. coastal plain	NULL
	Magnoliopsida	13	Fagales?	29	Juglandaceae?	56	Sporopollis spp.	324	976	Angiosperm	1	Camp	1	May, 1972	15	NULL	Blackhawk Fm. 5 (Wasatch Plateau)	9	48.8129	-83.1529	48.8665	-85.0696	47.8941	-87.4615	39.5664	-111.135	82.3	1.3	80	wet, successional	5	5. wet, successional	NULL
	Magnoliopsida	13	Magnoliales?	39	uncertain	105	Tricolpites spp.	358	1079	Angiosperm	1	Camp	1	May, 1972	15	NULL	Blackhawk Fm. 5 (Wasatch Plateau)	9	48.8129	-83.1529	48.8665	-85.0696	47.8941	-87.4615	39.5664	-111.135	82.3	1.3	80	coastal plain	4	4. coastal plain	NULL
	Magnoliopsida	13	Malpighiales	40	Euphorbiaceae	43	Tricolporopollenites sp.	362	1112	Angiosperm	1	Camp	1	May, 1972	15	NULL	Blackhawk Fm. 5 (Wasatch Plateau)	9	48.8129	-83.1529	48.8665	-85.0696	47.8941	-87.4615	39.5664	-111.135	82.3	1.3	80	temperate lowland forest	2	2. temperate lowland forest	NULL
	Magnoliopsida	13	Malpighiales	40	Euphorbiaceae	43	Tricolporopollenites spp.	362	1114	Angiosperm	1	Camp	1	May, 1972	15	NULL	Blackhawk Fm. 5 (Wasatch Plateau)	9	48.8129	-83.1529	48.8665	-85.0696	47.8941	-87.4615	39.5664	-111.135	82.3	1.3	80	temperate lowland forest	2	2. temperate lowland forest	NULL
	Magnoliopsida	13	Proteales	61	Proteaceae	84	Triporopollenites sp.	370	1139	Angiosperm	1	Camp	1	May, 1972	15	NULL	Blackhawk Fm. 5 (Wasatch Plateau)	9	48.8129	-83.1529	48.8665	-85.0696	47.8941	-87.4615	39.5664	-111.135	82.3	1.3	80	coastal plain	4	4. coastal plain	NULL
	Magnoliopsida	13	Proteales	61	Proteaceae	84	Triporopollenites spp.	370	1140	Angiosperm	1	Camp	1	May, 1972	15	NULL	Blackhawk Fm. 5 (Wasatch Plateau)	9	48.8129	-83.1529	48.8665	-85.0696	47.8941	-87.4615	39.5664	-111.135	82.3	1.3	80	coastal plain	4	4. coastal plain	NULL
	Lycopodiopsida	12	Lycopodiales	36	uncertain	105	Camarozonosporites sp.	44	226	Fern/Moss	2	Camp	1	May, 1972	15	NULL	Blackhawk Fm. 6 (Book Cliffs)	10	48.8481	-82.6007	48.9058	-84.5175	47.9368	-86.9203	39.6935	-110.69	82.3	1.3	80	coastal plain	4	4. coastal plain	NULL
	Lycopodiopsida	12	Lycopodiales	36	uncertain	105	Camarozonosporites spp.	44	227	Fern/Moss	2	Camp	1	May, 1972	15	NULL	Blackhawk Fm. 6 (Book Cliffs)	10	48.8481	-82.6007	48.9058	-84.5175	47.9368	-86.9203	39.6935	-110.69	82.3	1.3	80	coastal plain	4	4. coastal plain	NULL
	Polypodiopsida	18	Schizaeales	71	Schizaeaceae	93	Cicatricosisporites sp.	58	273	Fern/Moss	2	Camp	1	May, 1972	15	NULL	Blackhawk Fm. 6 (Book Cliffs)	10	48.8481	-82.6007	48.9058	-84.5175	47.9368	-86.9203	39.6935	-110.69	82.3	1.3	80	temperate lowland forest	2	2. temperate lowland forest	NULL
	Pinopsida	16	Pinales	54	Cheirolepidiaceae	25	Classopollis sp.	65	300	Gymnosperm	3	Camp	1	May, 1972	15	NULL	Blackhawk Fm. 6 (Book Cliffs)	10	48.8481	-82.6007	48.9058	-84.5175	47.9368	-86.9203	39.6935	-110.69	82.3	1.3	80	temperate lowland forest	2	2. temperate lowland forest	NULL
	Cycadopsida	5	Cycadales?	19	uncertain	105	Cycadopites sp.	84	361	Gymnosperm	3	Camp	1	May, 1972	15	NULL	Blackhawk Fm. 6 (Book Cliffs)	10	48.8481	-82.6007	48.9058	-84.5175	47.9368	-86.9203	39.6935	-110.69	82.3	1.3	80	tropical lowland forest	6	6. tropical lowland forest	NULL
	Polypodiopsida	18	uncertain	80	uncertain	105	Deltoidospora sp.	86	368	Fern/Moss	2	Camp	1	May, 1972	15	NULL	Blackhawk Fm. 6 (Book Cliffs)	10	48.8481	-82.6007	48.9058	-84.5175	47.9368	-86.9203	39.6935	-110.69	82.3	1.3	80	temperate lowland forest	2	2. temperate lowland forest	NULL
	Cycadopsida	5	Cycadales	18	uncertain	105	Eucommiidites sp.	110	433	Gymnosperm	3	Camp	1	May, 1972	15	NULL	Blackhawk Fm. 6 (Book Cliffs)	10	48.8481	-82.6007	48.9058	-84.5175	47.9368	-86.9203	39.6935	-110.69	82.3	1.3	80	coastal plain	4	4. coastal plain	NULL
	Magnoliopsida	13	Fagales?	29	Juglandaceae?	56	Extratriporopollenites sp.	114	439	Angiosperm	1	Camp	1	May, 1972	15	NULL	Blackhawk Fm. 6 (Book Cliffs)	10	48.8481	-82.6007	48.9058	-84.5175	47.9368	-86.9203	39.6935	-110.69	82.3	1.3	80	swampy, lagoonal	3	3. swampy, lagoonal	NULL
	Magnoliopsida	13	Fagales	28	Juglandaceae	55	Latipollis sp.	160	573	Angiosperm	1	Camp	1	May, 1972	15	NULL	Blackhawk Fm. 6 (Book Cliffs)	10	48.8481	-82.6007	48.9058	-84.5175	47.9368	-86.9203	39.6935	-110.69	82.3	1.3	80	swampy, lagoonal	3	3. swampy, lagoonal	NULL
	Polypodiopsida?	19	uncertain	80	uncertain	105	Leiotriletes sp.	161	576	Fern/Moss	2	Camp	1	May, 1972	15	NULL	Blackhawk Fm. 6 (Book Cliffs)	10	48.8481	-82.6007	48.9058	-84.5175	47.9368	-86.9203	39.6935	-110.69	82.3	1.3	80	swampy, lagoonal	3	3. swampy, lagoonal	NULL
	Lycopodiopsida	12	Lycopodiales	36	Lycopodiaceae	61	Lycopodiumsporites sp.	175	621	Fern/Moss	2	Camp	1	May, 1972	15	NULL	Blackhawk Fm. 6 (Book Cliffs)	10	48.8481	-82.6007	48.9058	-84.5175	47.9368	-86.9203	39.6935	-110.69	82.3	1.3	80	upland forest	1	1. upland forest	NULL
	Magnoliopsida	13	uncertain	80	uncertain	105	Proteacidites sp.	262	832	Angiosperm	1	Camp	1	May, 1972	15	NULL	Blackhawk Fm. 6 (Book Cliffs)	10	48.8481	-82.6007	48.9058	-84.5175	47.9368	-86.9203	39.6935	-110.69	82.3	1.3	80	unknown	0	0. unknown	NULL
	Magnoliopsida	13	Magnoliales?	39	uncertain	105	Retitricolpites sp.	290	884	Angiosperm	1	Camp	1	May, 1972	15	NULL	Blackhawk Fm. 6 (Book Cliffs)	10	48.8481	-82.6007	48.9058	-84.5175	47.9368	-86.9203	39.6935	-110.69	82.3	1.3	80	coastal plain	4	4. coastal plain	NULL
	Sphagnopsida	22	Sphagnales	76	Sphagnaceae	99	Sphagnumsporites spp.	322	971	Fern/Moss	2	Camp	1	May, 1972	15	NULL	Blackhawk Fm. 6 (Book Cliffs)	10	48.8481	-82.6007	48.9058	-84.5175	47.9368	-86.9203	39.6935	-110.69	82.3	1.3	80	swampy, lagoonal	3	3. swampy, lagoonal	NULL
	Magnoliopsida	13	Fagales?	29	Juglandaceae?	56	Sporopollis sp.	324	975	Angiosperm	1	Camp	1	May, 1972	15	NULL	Blackhawk Fm. 6 (Book Cliffs)	10	48.8481	-82.6007	48.9058	-84.5175	47.9368	-86.9203	39.6935	-110.69	82.3	1.3	80	wet, successional	5	5. wet, successional	NULL
	uncertain	23	uncertain	80	uncertain	105	Tetraporate type	346	1023	Angiosperm	1	Camp	1	May, 1972	15	NULL	Blackhawk Fm. 6 (Book Cliffs)	10	48.8481	-82.6007	48.9058	-84.5175	47.9368	-86.9203	39.6935	-110.69	82.3	1.3	80	temperate lowland forest	2	2. temperate lowland forest	NULL
	Magnoliopsida	13	Magnoliales?	39	uncertain	105	Tricolpites anguloluminosis	358	1051	Angiosperm	1	Camp	1	May, 1972	15	NULL	Blackhawk Fm. 6 (Book Cliffs)	10	48.8481	-82.6007	48.9058	-84.5175	47.9368	-86.9203	39.6935	-110.69	82.3	1.3	80	coastal plain	4	4. coastal plain	NULL
	Magnoliopsida	13	Magnoliales?	39	uncertain	105	Tricolpites spp.	358	1079	Angiosperm	1	Camp	1	May, 1972	15	NULL	Blackhawk Fm. 6 (Book Cliffs)	10	48.8481	-82.6007	48.9058	-84.5175	47.9368	-86.9203	39.6935	-110.69	82.3	1.3	80	coastal plain	4	4. coastal plain	NULL
	Magnoliopsida	13	Proteales	61	Proteaceae	84	Triporopollenites sp.	370	1139	Angiosperm	1	Camp	1	May, 1972	15	NULL	Blackhawk Fm. 6 (Book Cliffs)	10	48.8481	-82.6007	48.9058	-84.5175	47.9368	-86.9203	39.6935	-110.69	82.3	1.3	80	coastal plain	4	4. coastal plain	NULL
	Magnoliopsida	13	Proteales	61	Proteaceae	84	Triporopollenites spp.	370	1140	Angiosperm	1	Camp	1	May, 1972	15	NULL	Blackhawk Fm. 6 (Book Cliffs)	10	48.8481	-82.6007	48.9058	-84.5175	47.9368	-86.9203	39.6935	-110.69	82.3	1.3	80	coastal plain	4	4. coastal plain	NULL
	Pinopsida	16	Pinales	54	Araucariaceae	10	Balmeisporites spp.	31	193	Gymnosperm	3	Camp	1	May, 1972	15	NULL	Price River	35	48.0457	-81.9502	48.1081	-83.8531	47.1435	-86.2569	39.029	-109.884	73.15	3.25	75	coastal plain	4	4. coastal plain	NULL
	Lycopodiopsida	12	Selaginellales	73	Selaginellaceae?	96	Echinatispora sp.	96	384	Fern/Moss	2	Camp	1	May, 1972	15	NULL	Price River	35	48.0457	-81.9502	48.1081	-83.8531	47.1435	-86.2569	39.029	-109.884	73.15	3.25	75	estuarine, aquatic	7	7. estuarine, aquatic	NULL
	Magnoliopsida	13	Fagales?	29	Juglandaceae?	56	Extratriporopollenites sp.	114	439	Angiosperm	1	Camp	1	May, 1972	15	NULL	Price River	35	48.0457	-81.9502	48.1081	-83.8531	47.1435	-86.2569	39.029	-109.884	73.15	3.25	75	swampy, lagoonal	3	3. swampy, lagoonal	NULL
	Polypodiopsida	18	Hymenophyllales	33	Hymenophyllaceae	54	Hymenophyllumsporites sp.	143	512	Fern/Moss	2	Camp	1	May, 1972	15	NULL	Price River	35	48.0457	-81.9502	48.1081	-83.8531	47.1435	-86.2569	39.029	-109.884	73.15	3.25	75	swampy, lagoonal	3	3. swampy, lagoonal	NULL
	Pinopsida	16	Pinales?	55	uncertain	105	Inaperturopollenites sp.	147	527	Gymnosperm	3	Camp	1	May, 1972	15	NULL	Price River	35	48.0457	-81.9502	48.1081	-83.8531	47.1435	-86.2569	39.029	-109.884	73.15	3.25	75	temperate lowland forest	2	2. temperate lowland forest	NULL
	Magnoliopsida	13	Fagales	28	Juglandaceae	55	Latipollis spp.	160	574	Angiosperm	1	Camp	1	May, 1972	15	NULL	Price River	35	48.0457	-81.9502	48.1081	-83.8531	47.1435	-86.2569	39.029	-109.884	73.15	3.25	75	swampy, lagoonal	3	3. swampy, lagoonal	NULL
	Magnoliopsida	13	Santalales	65	Loranthaceae	59	Loranthacites macrosolenoides	171	604	Angiosperm	1	Camp	1	May, 1972	15	NULL	Price River	35	48.0457	-81.9502	48.1081	-83.8531	47.1435	-86.2569	39.029	-109.884	73.15	3.25	75	tropical lowland forest	6	6. tropical lowland forest	NULL
	uncertain	23	uncertain	80	uncertain	105	Mancicorpus notabile	180	629	Angiosperm	1	Camp	1	May, 1972	15	NULL	Price River	35	48.0457	-81.9502	48.1081	-83.8531	47.1435	-86.2569	39.029	-109.884	73.15	3.25	75	coastal plain	4	4. coastal plain	NULL
	uncertain	23	uncertain	80	uncertain	105	Mancicorpus anchoriforme	180	631	Angiosperm	1	Camp	1	May, 1972	15	NULL	Price River	35	48.0457	-81.9502	48.1081	-83.8531	47.1435	-86.2569	39.029	-109.884	73.15	3.25	75	coastal plain	4	4. coastal plain	NULL
	uncertain	23	uncertain	80	uncertain	105	Mancicorpus solidum	180	638	Angiosperm	1	Camp	1	May, 1972	15	NULL	Price River	35	48.0457	-81.9502	48.1081	-83.8531	47.1435	-86.2569	39.029	-109.884	73.15	3.25	75	coastal plain	4	4. coastal plain	NULL
	uncertain	23	uncertain	80	uncertain	105	Mancicorpus spp.	180	640	Angiosperm	1	Camp	1	May, 1972	15	NULL	Price River	35	48.0457	-81.9502	48.1081	-83.8531	47.1435	-86.2569	39.029	-109.884	73.15	3.25	75	coastal plain	4	4. coastal plain	NULL
	uncertain	23	uncertain	80	uncertain	105	Monosulcites sp.	194	687	Angiosperm	1	Camp	1	May, 1972	15	NULL	Price River	35	48.0457	-81.9502	48.1081	-83.8531	47.1435	-86.2569	39.029	-109.884	73.15	3.25	75	coastal plain	4	4. coastal plain	NULL
	Magnoliopsida	13	Fagales?	29	Juglandaceae?	56	Nudopollis sp.	208	706	Angiosperm	1	Camp	1	May, 1972	15	NULL	Price River	35	48.0457	-81.9502	48.1081	-83.8531	47.1435	-86.2569	39.029	-109.884	73.15	3.25	75	temperate lowland forest	2	2. temperate lowland forest	NULL
	uncertain	23	uncertain	80	uncertain	105	Pentaporate angiosperm grain	228	744	Angiosperm	1	Camp	1	May, 1972	15	NULL	Price River	35	48.0457	-81.9502	48.1081	-83.8531	47.1435	-86.2569	39.029	-109.884	73.15	3.25	75	unknown	0	0. unknown	NULL
	Pteridospermatopsida	20	Peltaspermales	53	uncertain	105	Piceaepollenites sp.	237	755	Gymnosperm	3	Camp	1	May, 1972	15	NULL	Price River	35	48.0457	-81.9502	48.1081	-83.8531	47.1435	-86.2569	39.029	-109.884	73.15	3.25	75	upland forest	1	1. upland forest	NULL
	Pinopsida	16	Pinales	54	Podocarpaceae	79	Podocarpidites sp.	248	791	Gymnosperm	3	Camp	1	May, 1972	15	NULL	Price River	35	48.0457	-81.9502	48.1081	-83.8531	47.1435	-86.2569	39.029	-109.884	73.15	3.25	75	temperate lowland forest	2	2. temperate lowland forest	NULL
	uncertain	23	uncertain	80	uncertain	105	Projectoporites sp.	261	822	Angiosperm	1	Camp	1	May, 1972	15	NULL	Price River	35	48.0457	-81.9502	48.1081	-83.8531	47.1435	-86.2569	39.029	-109.884	73.15	3.25	75	temperate lowland forest	2	2. temperate lowland forest	NULL
	Magnoliopsida	13	Proteales	61	uncertain	105	Proteacidites sp.	262	832	Angiosperm	1	Camp	1	May, 1972	15	NULL	Price River	35	48.0457	-81.9502	48.1081	-83.8531	47.1435	-86.2569	39.029	-109.884	73.15	3.25	75	unknown	0	0. unknown	NULL
	Magnoliopsida	13	Proteales	61	uncertain	105	Proteacidites spp.	262	833	Angiosperm	1	Camp	1	May, 1972	15	NULL	Price River	35	48.0457	-81.9502	48.1081	-83.8531	47.1435	-86.2569	39.029	-109.884	73.15	3.25	75	unknown	0	0. unknown	NULL
	Polypodiopsida	18	uncertain	80	uncertain	105	Reticuloidosporites sp.	287	875	Fern/Moss	2	Camp	1	May, 1972	15	NULL	Price River	35	48.0457	-81.9502	48.1081	-83.8531	47.1435	-86.2569	39.029	-109.884	73.15	3.25	75	upland forest	1	1. upland forest	NULL
	Magnoliopsida	13	Fagales?	29	Juglandaceae?	56	Sporopollis sp.	324	975	Angiosperm	1	Camp	1	May, 1972	15	NULL	Price River	35	48.0457	-81.9502	48.1081	-83.8531	47.1435	-86.2569	39.029	-109.884	73.15	3.25	75	wet, successional	5	5. wet, successional	NULL
	uncertain	23	uncertain	80	uncertain	105	Syncolporopollenites sp.	339	1010	Angiosperm	1	Camp	1	May, 1972	15	NULL	Price River	35	48.0457	-81.9502	48.1081	-83.8531	47.1435	-86.2569	39.029	-109.884	73.15	3.25	75	tropical lowland forest	6	6. tropical lowland forest	NULL
	Magnoliopsida	13	Magnoliales?	39	uncertain	105	Tricolpites spp.	358	1079	Angiosperm	1	Camp	1	May, 1972	15	NULL	Price River	35	48.0457	-81.9502	48.1081	-83.8531	47.1435	-86.2569	39.029	-109.884	73.15	3.25	75	coastal plain	4	4. coastal plain	NULL
	Magnoliopsida	13	Malpighiales	40	Euphorbiaceae	43	Tricolporopollenites spp.	362	1114	Angiosperm	1	Camp	1	May, 1972	15	NULL	Price River	35	48.0457	-81.9502	48.1081	-83.8531	47.1435	-86.2569	39.029	-109.884	73.15	3.25	75	temperate lowland forest	2	2. temperate lowland forest	NULL
	Magnoliopsida	13	Proteales	61	Proteaceae	84	Triporopollenites spp.	370	1140	Angiosperm	1	Camp	1	May, 1972	15	NULL	Price River	35	48.0457	-81.9502	48.1081	-83.8531	47.1435	-86.2569	39.029	-109.884	73.15	3.25	75	coastal plain	4	4. coastal plain	NULL
	Lycopodiopsida	12	Lycopodiales	36	uncertain	105	Camarozonosporites heskemensis	44	224	Fern/Moss	2	Camp	1	May, 1972	15	NULL	Blackhawk Fm. 3 (Vernal)	7	49.4576	-81.2102	49.5253	-83.1356	48.5653	-85.574	40.5192	-109.751	82.3	1.3	80	coastal plain	4	4. coastal plain	NULL
	Lycopodiopsida	12	Lycopodiales	36	uncertain	105	Camarozonosporites sp.	44	226	Fern/Moss	2	Camp	1	May, 1972	15	NULL	Blackhawk Fm. 3 (Vernal)	7	49.4576	-81.2102	49.5253	-83.1356	48.5653	-85.574	40.5192	-109.751	82.3	1.3	80	coastal plain	4	4. coastal plain	NULL
	Polypodiopsida	18	Schizaeales	71	Schizaeaceae	93	Cicatricosisporites sp.	58	273	Fern/Moss	2	Camp	1	May, 1972	15	NULL	Blackhawk Fm. 3 (Vernal)	7	49.4576	-81.2102	49.5253	-83.1356	48.5653	-85.574	40.5192	-109.751	82.3	1.3	80	temperate lowland forest	2	2. temperate lowland forest	NULL
	Pinopsida?	17	Pinales?	55	uncertain	105	Conifer pollen type	74	317	Gymnosperm	3	Camp	1	May, 1972	15	NULL	Blackhawk Fm. 3 (Vernal)	7	49.4576	-81.2102	49.5253	-83.1356	48.5653	-85.574	40.5192	-109.751	82.3	1.3	80	unknown	0	0. unknown	NULL
	Polypodiopsida	18	uncertain	80	uncertain	105	Deltoidospora sp.	86	368	Fern/Moss	2	Camp	1	May, 1972	15	NULL	Blackhawk Fm. 3 (Vernal)	7	49.4576	-81.2102	49.5253	-83.1356	48.5653	-85.574	40.5192	-109.751	82.3	1.3	80	temperate lowland forest	2	2. temperate lowland forest	NULL
	Magnoliopsida	13	Fagales	28	Juglandaceae	55	Latipollis sp.	160	573	Angiosperm	1	Camp	1	May, 1972	15	NULL	Blackhawk Fm. 3 (Vernal)	7	49.4576	-81.2102	49.5253	-83.1356	48.5653	-85.574	40.5192	-109.751	82.3	1.3	80	swampy, lagoonal	3	3. swampy, lagoonal	NULL
	uncertain	23	uncertain	80	uncertain	105	Monosulcites sp.	194	687	Angiosperm	1	Camp	1	May, 1972	15	NULL	Blackhawk Fm. 3 (Vernal)	7	49.4576	-81.2102	49.5253	-83.1356	48.5653	-85.574	40.5192	-109.751	82.3	1.3	80	coastal plain	4	4. coastal plain	NULL
	Magnoliopsida	13	Magnoliales?	39	uncertain	105	Tricolpites anguloluminosis	358	1051	Angiosperm	1	Camp	1	May, 1972	15	NULL	Blackhawk Fm. 3 (Vernal)	7	49.4576	-81.2102	49.5253	-83.1356	48.5653	-85.574	40.5192	-109.751	82.3	1.3	80	coastal plain	4	4. coastal plain	NULL
	Magnoliopsida	13	Magnoliales?	39	uncertain	105	Tricolpites sp.	358	1078	Angiosperm	1	Camp	1	May, 1972	15	NULL	Blackhawk Fm. 3 (Vernal)	7	49.4576	-81.2102	49.5253	-83.1356	48.5653	-85.574	40.5192	-109.751	82.3	1.3	80	coastal plain	4	4. coastal plain	NULL
	Magnoliopsida	13	Magnoliales?	39	uncertain	105	Tricolpites spp.	358	1079	Angiosperm	1	Camp	1	May, 1972	15	NULL	Blackhawk Fm. 3 (Vernal)	7	49.4576	-81.2102	49.5253	-83.1356	48.5653	-85.574	40.5192	-109.751	82.3	1.3	80	coastal plain	4	4. coastal plain	NULL
	Magnoliopsida	13	Malpighiales	40	Euphorbiaceae	43	Tricolporopollenites sp.	362	1112	Angiosperm	1	Camp	1	May, 1972	15	NULL	Blackhawk Fm. 3 (Vernal)	7	49.4576	-81.2102	49.5253	-83.1356	48.5653	-85.574	40.5192	-109.751	82.3	1.3	80	temperate lowland forest	2	2. temperate lowland forest	NULL
	Magnoliopsida	13	Proteales	61	Proteaceae	84	Triporopollenites sp.	370	1139	Angiosperm	1	Camp	1	May, 1972	15	NULL	Blackhawk Fm. 3 (Vernal)	7	49.4576	-81.2102	49.5253	-83.1356	48.5653	-85.574	40.5192	-109.751	82.3	1.3	80	coastal plain	4	4. coastal plain	NULL
	Magnoliopsida	13	Proteales	61	Proteaceae	84	Triporopollenites spp.	370	1140	Angiosperm	1	Camp	1	May, 1972	15	NULL	Blackhawk Fm. 3 (Vernal)	7	49.4576	-81.2102	49.5253	-83.1356	48.5653	-85.574	40.5192	-109.751	82.3	1.3	80	coastal plain	4	4. coastal plain	NULL
	Pinopsida	16	Pinales	54	Cheirolepidiaceae	25	Classopollis sp.	65	300	Gymnosperm	3	Camp	1	May, 1972	15	NULL	Blackhawk Fm. 4 (Tabby Mountain)	8	49.5452	-82.4999	49.6035	-84.4283	48.6351	-86.8431	40.3839	-110.843	82.3	1.3	80	temperate lowland forest	2	2. temperate lowland forest	NULL
	Magnoliopsida	13	Fagales	28	Juglandaceae	55	Latipollis sp.	160	573	Angiosperm	1	Camp	1	May, 1972	15	NULL	Blackhawk Fm. 4 (Tabby Mountain)	8	49.5452	-82.4999	49.6035	-84.4283	48.6351	-86.8431	40.3839	-110.843	82.3	1.3	80	swampy, lagoonal	3	3. swampy, lagoonal	NULL
	uncertain	23	uncertain	80	uncertain	105	Monosulcites sp.	194	687	Angiosperm	1	Camp	1	May, 1972	15	NULL	Blackhawk Fm. 4 (Tabby Mountain)	8	49.5452	-82.4999	49.6035	-84.4283	48.6351	-86.8431	40.3839	-110.843	82.3	1.3	80	coastal plain	4	4. coastal plain	NULL
	Magnoliopsida	13	uncertain	80	uncertain	105	Proteacidites spp.	262	833	Angiosperm	1	Camp	1	May, 1972	15	NULL	Blackhawk Fm. 4 (Tabby Mountain)	8	49.5452	-82.4999	49.6035	-84.4283	48.6351	-86.8431	40.3839	-110.843	82.3	1.3	80	unknown	0	0. unknown	NULL
	Magnoliopsida	13	Magnoliales?	39	uncertain	105	Tricolpites spp.	358	1079	Angiosperm	1	Camp	1	May, 1972	15	NULL	Blackhawk Fm. 4 (Tabby Mountain)	8	49.5452	-82.4999	49.6035	-84.4283	48.6351	-86.8431	40.3839	-110.843	82.3	1.3	80	coastal plain	4	4. coastal plain	NULL
	Magnoliopsida	13	Proteales	61	Proteaceae	84	Triporopollenites spp.	370	1140	Angiosperm	1	Camp	1	May, 1972	15	NULL	Blackhawk Fm. 4 (Tabby Mountain)	8	49.5452	-82.4999	49.6035	-84.4283	48.6351	-86.8431	40.3839	-110.843	82.3	1.3	80	coastal plain	4	4. coastal plain	NULL
	Lycopodiopsida	12	Selaginellales	73	Selaginellaceae	95	Acanthotriletes sp.	4	8	Fern/Moss	2	Camp	1	Miller et al., 2013; Lohrengel, 1969	16	NULL	Kaiparowits	29	47.0771	-84.6912	47.1198	-86.5814	46.1384	-88.9224	37.6288	-111.859	75.5	1.3	75	swampy, lagoonal	3	3. swampy, lagoonal	NULL
	Magnoliopsida	13	Santalales?	66	Santalaceae?	90	Aquilapollenites cf. A. delicatus	22	77	Angiosperm	1	Camp	1	Miller et al., 2013; Lohrengel, 1969	16	NULL	Kaiparowits	29	47.0771	-84.6912	47.1198	-86.5814	46.1384	-88.9224	37.6288	-111.859	75.5	1.3	75	temperate lowland forest	2	2. temperate lowland forest	NULL
	Magnoliopsida	13	Santalales?	66	Santalaceae?	90	Aquilapollenites pyriformis	22	122	Angiosperm	1	Camp	1	Miller et al., 2013; Lohrengel, 1969	16	NULL	Kaiparowits	29	47.0771	-84.6912	47.1198	-86.5814	46.1384	-88.9224	37.6288	-111.859	75.5	1.3	75	temperate lowland forest	2	2. temperate lowland forest	NULL
	Magnoliopsida	13	Santalales?	66	Santalaceae?	90	Aquilapollenites spp.	22	135	Angiosperm	1	Camp	1	Miller et al., 2013; Lohrengel, 1969	16	NULL	Kaiparowits	29	47.0771	-84.6912	47.1198	-86.5814	46.1384	-88.9224	37.6288	-111.859	75.5	1.3	75	temperate lowland forest	2	2. temperate lowland forest	NULL
	Pinopsida	16	Pinales	54	Araucariaceae	10	Araucariacites australis	24	147	Gymnosperm	3	Camp	1	Miller et al., 2013; Lohrengel, 1969	16	NULL	Kaiparowits	29	47.0771	-84.6912	47.1198	-86.5814	46.1384	-88.9224	37.6288	-111.859	75.5	1.3	75	coastal plain	4	4. coastal plain	NULL
	Polypodiopsida	18	Salviniales	64	Salviniaceae	88	Azolla cretacea	27	163	Fern/Moss	2	Camp	1	Miller et al., 2013; Lohrengel, 1969	16	NULL	Kaiparowits	29	47.0771	-84.6912	47.1198	-86.5814	46.1384	-88.9224	37.6288	-111.859	75.5	1.3	75	estuarine, aquatic	7	7. estuarine, aquatic	NULL
	Pinopsida	16	Pinales	54	Araucariaceae	10	Balmeisporites sp.	31	191	Gymnosperm	3	Camp	1	Miller et al., 2013; Lohrengel, 1969	16	NULL	Kaiparowits	29	47.0771	-84.6912	47.1198	-86.5814	46.1384	-88.9224	37.6288	-111.859	75.5	1.3	75	coastal plain	4	4. coastal plain	NULL
	Lycopodiopsida	12	Selaginellales	73	Selaginellaceae	95	Ceratosporites sp.	52	245	Fern/Moss	2	Camp	1	Miller et al., 2013; Lohrengel, 1969	16	NULL	Kaiparowits	29	47.0771	-84.6912	47.1198	-86.5814	46.1384	-88.9224	37.6288	-111.859	75.5	1.3	75	tropical lowland forest	6	6. tropical lowland forest	NULL
	Polypodiopsida	18	Schizaeales	71	Schizaeaceae	93	Cicatricosisporites doragensis	58	261	Fern/Moss	2	Camp	1	Miller et al., 2013; Lohrengel, 1969	16	NULL	Kaiparowits	29	47.0771	-84.6912	47.1198	-86.5814	46.1384	-88.9224	37.6288	-111.859	75.5	1.3	75	temperate lowland forest	2	2. temperate lowland forest	NULL
	Anthocerotopsida	1	Anthocerotales?	2	Anthocerotaceae?	4	Cingulatisporites cf. C. scabratus	59	279	Fern/Moss	2	Camp	1	Miller et al., 2013; Lohrengel, 1969	16	NULL	Kaiparowits	29	47.0771	-84.6912	47.1198	-86.5814	46.1384	-88.9224	37.6288	-111.859	75.5	1.3	75	coastal plain	4	4. coastal plain	NULL
	Anthocerotopsida	1	Anthocerotales?	2	Anthocerotaceae?	4	Cingulatisporites sp.	59	283	Fern/Moss	2	Camp	1	Miller et al., 2013; Lohrengel, 1969	16	NULL	Kaiparowits	29	47.0771	-84.6912	47.1198	-86.5814	46.1384	-88.9224	37.6288	-111.859	75.5	1.3	75	coastal plain	4	4. coastal plain	NULL
	Polypodiopsida?	19	uncertain	80	uncertain	105	Concavisporites sp.	70	310	Fern/Moss	2	Camp	1	Miller et al., 2013; Lohrengel, 1969	16	NULL	Kaiparowits	29	47.0771	-84.6912	47.1198	-86.5814	46.1384	-88.9224	37.6288	-111.859	75.5	1.3	75	coastal plain	4	4. coastal plain	NULL
	Polypodiopsida?	19	uncertain	80	uncertain	105	Concavisporites sp.	70	310	Fern/Moss	2	Camp	1	Miller et al., 2013; Lohrengel, 1969	16	NULL	Kaiparowits	29	47.0771	-84.6912	47.1198	-86.5814	46.1384	-88.9224	37.6288	-111.859	75.5	1.3	75	coastal plain	4	4. coastal plain	NULL
	Polypodiopsida	18	Cyatheales?	17	Cyatheaceae?	32	Cyathidites minor	82	349	Fern/Moss	2	Camp	1	Miller et al., 2013; Lohrengel, 1969	16	NULL	Kaiparowits	29	47.0771	-84.6912	47.1198	-86.5814	46.1384	-88.9224	37.6288	-111.859	75.5	1.3	75	temperate lowland forest	2	2. temperate lowland forest	NULL
	Cycadopsida	5	Cycadales?	19	uncertain	105	Cycadopites cf. C. giganteous	84	356	Gymnosperm	3	Camp	1	Miller et al., 2013; Lohrengel, 1969	16	NULL	Kaiparowits	29	47.0771	-84.6912	47.1198	-86.5814	46.1384	-88.9224	37.6288	-111.859	75.5	1.3	75	tropical lowland forest	6	6. tropical lowland forest	NULL
	Cycadopsida	5	Cycadales?	19	uncertain	105	Cycadopites sp.	84	361	Gymnosperm	3	Camp	1	Miller et al., 2013; Lohrengel, 1969	16	NULL	Kaiparowits	29	47.0771	-84.6912	47.1198	-86.5814	46.1384	-88.9224	37.6288	-111.859	75.5	1.3	75	tropical lowland forest	6	6. tropical lowland forest	NULL
	Polypodiopsida	18	uncertain	80	uncertain	105	Deltoidospora psilostoma	86	367	Fern/Moss	2	Camp	1	Miller et al., 2013; Lohrengel, 1969	16	NULL	Kaiparowits	29	47.0771	-84.6912	47.1198	-86.5814	46.1384	-88.9224	37.6288	-111.859	75.5	1.3	75	temperate lowland forest	2	2. temperate lowland forest	NULL
	Cycadopsida?	6	Cycadales?	19	uncertain	105	Entylissa cf. E. nitidus	102	396	Gymnosperm	3	Camp	1	Miller et al., 2013; Lohrengel, 1969	16	NULL	Kaiparowits	29	47.0771	-84.6912	47.1198	-86.5814	46.1384	-88.9224	37.6288	-111.859	75.5	1.3	75	tropical lowland forest	6	6. tropical lowland forest	NULL
	Cycadopsida?	6	Cycadales?	19	uncertain	105	Entylissa sp.	102	397	Gymnosperm	3	Camp	1	Miller et al., 2013; Lohrengel, 1969	16	NULL	Kaiparowits	29	47.0771	-84.6912	47.1198	-86.5814	46.1384	-88.9224	37.6288	-111.859	75.5	1.3	75	tropical lowland forest	6	6. tropical lowland forest	NULL
	Magnoliopsida	13	Ericales?	25	Ericaceae?	42	Ericaceoipollenites rallus	108	425	Angiosperm	1	Camp	1	Miller et al., 2013; Lohrengel, 1969	16	NULL	Kaiparowits	29	47.0771	-84.6912	47.1198	-86.5814	46.1384	-88.9224	37.6288	-111.859	75.5	1.3	75	wet, successional	5	5. wet, successional	NULL
	Magnoliopsida	13	Fagales?	29	Juglandaceae?	56	Extratriporopollenites pompeckii	114	438	Angiosperm	1	Camp	1	Miller et al., 2013; Lohrengel, 1969	16	NULL	Kaiparowits	29	47.0771	-84.6912	47.1198	-86.5814	46.1384	-88.9224	37.6288	-111.859	75.5	1.3	75	swampy, lagoonal	3	3. swampy, lagoonal	NULL
	Lycopodiopsida	12	Lycopodiales?	37	Lycopodiaceae?	62	Foveotriletes sp.	121	461	Fern/Moss	2	Camp	1	Miller et al., 2013; Lohrengel, 1969	16	NULL	Kaiparowits	29	47.0771	-84.6912	47.1198	-86.5814	46.1384	-88.9224	37.6288	-111.859	75.5	1.3	75	estuarine, aquatic	7	7. estuarine, aquatic	NULL
	uncertain	23	uncertain	80	uncertain	105	Hymenozonotriletes sp.	144	513	Fern/Moss	2	Camp	1	Miller et al., 2013; Lohrengel, 1969	16	NULL	Kaiparowits	29	47.0771	-84.6912	47.1198	-86.5814	46.1384	-88.9224	37.6288	-111.859	75.5	1.3	75	swampy, lagoonal	3	3. swampy, lagoonal	NULL
	Pinopsida	16	Pinales?	55	uncertain	105	Inaperturopollenites cf. I. incertus	147	519	Gymnosperm	3	Camp	1	Miller et al., 2013; Lohrengel, 1969	16	NULL	Kaiparowits	29	47.0771	-84.6912	47.1198	-86.5814	46.1384	-88.9224	37.6288	-111.859	75.5	1.3	75	temperate lowland forest	2	2. temperate lowland forest	NULL
	Pinopsida	16	Pinales?	55	uncertain	105	Inaperturopollenites cf. I. limbatus	147	520	Gymnosperm	3	Camp	1	Miller et al., 2013; Lohrengel, 1969	16	NULL	Kaiparowits	29	47.0771	-84.6912	47.1198	-86.5814	46.1384	-88.9224	37.6288	-111.859	75.5	1.3	75	temperate lowland forest	2	2. temperate lowland forest	NULL
	Pinopsida	16	Pinales?	55	uncertain	105	Inaperturopollenites dubius	147	522	Gymnosperm	3	Camp	1	Miller et al., 2013; Lohrengel, 1969	16	NULL	Kaiparowits	29	47.0771	-84.6912	47.1198	-86.5814	46.1384	-88.9224	37.6288	-111.859	75.5	1.3	75	temperate lowland forest	2	2. temperate lowland forest	NULL
	Pinopsida	16	Pinales?	55	uncertain	105	Inaperturopollenites minor	147	525	Gymnosperm	3	Camp	1	Miller et al., 2013; Lohrengel, 1969	16	NULL	Kaiparowits	29	47.0771	-84.6912	47.1198	-86.5814	46.1384	-88.9224	37.6288	-111.859	75.5	1.3	75	temperate lowland forest	2	2. temperate lowland forest	NULL
	Pinopsida	16	Pinales?	55	uncertain	105	Inaperturopollenites rugosa	147	526	Gymnosperm	3	Camp	1	Miller et al., 2013; Lohrengel, 1969	16	NULL	Kaiparowits	29	47.0771	-84.6912	47.1198	-86.5814	46.1384	-88.9224	37.6288	-111.859	75.5	1.3	75	temperate lowland forest	2	2. temperate lowland forest	NULL
	Pinopsida	16	Pinales?	55	uncertain	105	Inaperturopollenites sp.	147	527	Gymnosperm	3	Camp	1	Miller et al., 2013; Lohrengel, 1969	16	NULL	Kaiparowits	29	47.0771	-84.6912	47.1198	-86.5814	46.1384	-88.9224	37.6288	-111.859	75.5	1.3	75	temperate lowland forest	2	2. temperate lowland forest	NULL
	Polypodiopsida?	19	uncertain	80	uncertain	105	Intertriletes cf. I scrobiculatus	150	532	Fern/Moss	2	Camp	1	Miller et al., 2013; Lohrengel, 1969	16	NULL	Kaiparowits	29	47.0771	-84.6912	47.1198	-86.5814	46.1384	-88.9224	37.6288	-111.859	75.5	1.3	75	swampy, lagoonal	3	3. swampy, lagoonal	NULL
	Polypodiopsida	18	uncertain	80	uncertain	105	Laevigatosporites haardti	158	565	Fern/Moss	2	Camp	1	Miller et al., 2013; Lohrengel, 1969	16	NULL	Kaiparowits	29	47.0771	-84.6912	47.1198	-86.5814	46.1384	-88.9224	37.6288	-111.859	75.5	1.3	75	coastal plain	4	4. coastal plain	NULL
	Polypodiopsida	18	uncertain	80	uncertain	105	Laevigatosporites ovatus	158	567	Fern/Moss	2	Camp	1	Miller et al., 2013; Lohrengel, 1969	16	NULL	Kaiparowits	29	47.0771	-84.6912	47.1198	-86.5814	46.1384	-88.9224	37.6288	-111.859	75.5	1.3	75	coastal plain	4	4. coastal plain	NULL
	Pinopsida	16	Pinales?	55	uncertain	105	Laricoidites magnus	159	572	Gymnosperm	3	Camp	1	Miller et al., 2013; Lohrengel, 1969	16	NULL	Kaiparowits	29	47.0771	-84.6912	47.1198	-86.5814	46.1384	-88.9224	37.6288	-111.859	75.5	1.3	75	swampy, lagoonal	3	3. swampy, lagoonal	NULL
	uncertain	23	uncertain	80	uncertain	105	Leiotriletes pseudomaximus	161	575	Fern/Moss	2	Camp	1	Miller et al., 2013; Lohrengel, 1969	16	NULL	Kaiparowits	29	47.0771	-84.6912	47.1198	-86.5814	46.1384	-88.9224	37.6288	-111.859	75.5	1.3	75	swampy, lagoonal	3	3. swampy, lagoonal	NULL
	uncertain	23	uncertain	80	uncertain	105	Leiotriletes sp.	161	576	Fern/Moss	2	Camp	1	Miller et al., 2013; Lohrengel, 1969	16	NULL	Kaiparowits	29	47.0771	-84.6912	47.1198	-86.5814	46.1384	-88.9224	37.6288	-111.859	75.5	1.3	75	swampy, lagoonal	3	3. swampy, lagoonal	NULL
	Liliopsida	10	Liliales	34	uncertain	105	Liliacidites sp.	168	598	Angiosperm	1	Camp	1	Miller et al., 2013; Lohrengel, 1969	16	NULL	Kaiparowits	29	47.0771	-84.6912	47.1198	-86.5814	46.1384	-88.9224	37.6288	-111.859	75.5	1.3	75	temperate lowland forest	2	2. temperate lowland forest	NULL
	Liliopsida	10	Liliales	34	uncertain	105	Liliacidites variegatus	168	600	Angiosperm	1	Camp	1	Miller et al., 2013; Lohrengel, 1969	16	NULL	Kaiparowits	29	47.0771	-84.6912	47.1198	-86.5814	46.1384	-88.9224	37.6288	-111.859	75.5	1.3	75	temperate lowland forest	2	2. temperate lowland forest	NULL
	Lycopodiopsida	12	Lycopodiales	36	Lycopodiaceae	61	Lycopodiumsporites cf. L. austroclavitidites	175	617	Fern/Moss	2	Camp	1	Miller et al., 2013; Lohrengel, 1969	16	NULL	Kaiparowits	29	47.0771	-84.6912	47.1198	-86.5814	46.1384	-88.9224	37.6288	-111.859	75.5	1.3	75	upland forest	1	1. upland forest	NULL
	Lycopodiopsida	12	Lycopodiales	36	Lycopodiaceae	61	Lycopodiumsporites cf. L. fastigioides	175	618	Fern/Moss	2	Camp	1	Miller et al., 2013; Lohrengel, 1969	16	NULL	Kaiparowits	29	47.0771	-84.6912	47.1198	-86.5814	46.1384	-88.9224	37.6288	-111.859	75.5	1.3	75	upland forest	1	1. upland forest	NULL
	Liliopsida	10	Arecales?	7	Arecaceae?	12	Monocolpopollenites minor	191	674	Angiosperm	1	Camp	1	Miller et al., 2013; Lohrengel, 1969	16	NULL	Kaiparowits	29	47.0771	-84.6912	47.1198	-86.5814	46.1384	-88.9224	37.6288	-111.859	75.5	1.3	75	tropical lowland forest	6	6. tropical lowland forest	NULL
	Liliopsida	10	Arecales?	7	Arecaceae?	12	Monocolpopollenites spp.	191	675	Angiosperm	1	Camp	1	Miller et al., 2013; Lohrengel, 1969	16	NULL	Kaiparowits	29	47.0771	-84.6912	47.1198	-86.5814	46.1384	-88.9224	37.6288	-111.859	75.5	1.3	75	tropical lowland forest	6	6. tropical lowland forest	NULL
	Liliopsida	10	Arecales?	7	Arecaceae?	12	Monocolpopollenites verrucatus	191	676	Angiosperm	1	Camp	1	Miller et al., 2013; Lohrengel, 1969	16	NULL	Kaiparowits	29	47.0771	-84.6912	47.1198	-86.5814	46.1384	-88.9224	37.6288	-111.859	75.5	1.3	75	tropical lowland forest	6	6. tropical lowland forest	NULL
	uncertain	23	uncertain	80	uncertain	105	Monosulcites cf. M. carpentieri	194	679	Angiosperm	1	Camp	1	Miller et al., 2013; Lohrengel, 1969	16	NULL	Kaiparowits	29	47.0771	-84.6912	47.1198	-86.5814	46.1384	-88.9224	37.6288	-111.859	75.5	1.3	75	coastal plain	4	4. coastal plain	NULL
	uncertain	23	uncertain	80	uncertain	105	Monosulcites cf. M. perspinosus	194	681	Angiosperm	1	Camp	1	Miller et al., 2013; Lohrengel, 1969	16	NULL	Kaiparowits	29	47.0771	-84.6912	47.1198	-86.5814	46.1384	-88.9224	37.6288	-111.859	75.5	1.3	75	coastal plain	4	4. coastal plain	NULL
	Pinopsida	16	Pinales	54	Podocarpaceae	79	Phyllocladidites mawsonii	235	753	Gymnosperm	3	Camp	1	Miller et al., 2013; Lohrengel, 1969	16	NULL	Kaiparowits	29	47.0771	-84.6912	47.1198	-86.5814	46.1384	-88.9224	37.6288	-111.859	75.5	1.3	75	temperate lowland forest	2	2. temperate lowland forest	NULL
	Pteridospermatopsida	20	Peltaspermales	53	uncertain	105	Piceaepollenites sp.	237	755	Gymnosperm	3	Camp	1	Miller et al., 2013; Lohrengel, 1969	16	NULL	Kaiparowits	29	47.0771	-84.6912	47.1198	-86.5814	46.1384	-88.9224	37.6288	-111.859	75.5	1.3	75	upland forest	1	1. upland forest	NULL
	Ginkgoopsida?	7	uncertain	80	uncertain	105	Pityosporites constrictus	243	769	Gymnosperm	3	Camp	1	Miller et al., 2013; Lohrengel, 1969	16	NULL	Kaiparowits	29	47.0771	-84.6912	47.1198	-86.5814	46.1384	-88.9224	37.6288	-111.859	75.5	1.3	75	coastal plain	4	4. coastal plain	NULL
	Pinopsida	16	Pinales	54	Podocarpaceae	79	Podocarpidites sp.	248	791	Gymnosperm	3	Camp	1	Miller et al., 2013; Lohrengel, 1969	16	NULL	Kaiparowits	29	47.0771	-84.6912	47.1198	-86.5814	46.1384	-88.9224	37.6288	-111.859	75.5	1.3	75	temperate lowland forest	2	2. temperate lowland forest	NULL
	uncertain	23	uncertain	80	uncertain	105	Poracolpopollenites miikensis	258	818	Angiosperm	1	Camp	1	Miller et al., 2013; Lohrengel, 1969	16	NULL	Kaiparowits	29	47.0771	-84.6912	47.1198	-86.5814	46.1384	-88.9224	37.6288	-111.859	75.5	1.3	75	unknown	0	0. unknown	NULL
	Magnoliopsida	13	Proteales	61	uncertain	105	Proteacidites retusus	262	831	Angiosperm	1	Camp	1	Miller et al., 2013; Lohrengel, 1969	16	NULL	Kaiparowits	29	47.0771	-84.6912	47.1198	-86.5814	46.1384	-88.9224	37.6288	-111.859	75.5	1.3	75	unknown	0	0. unknown	NULL
	Magnoliopsida	13	Proteales	61	uncertain	105	Proteacidites sp.	262	832	Angiosperm	1	Camp	1	Miller et al., 2013; Lohrengel, 1969	16	NULL	Kaiparowits	29	47.0771	-84.6912	47.1198	-86.5814	46.1384	-88.9224	37.6288	-111.859	75.5	1.3	75	unknown	0	0. unknown	NULL
	Magnoliopsida	13	Proteales	61	uncertain	105	Proteacidites subpoalisadus	262	834	Angiosperm	1	Camp	1	Miller et al., 2013; Lohrengel, 1969	16	NULL	Kaiparowits	29	47.0771	-84.6912	47.1198	-86.5814	46.1384	-88.9224	37.6288	-111.859	75.5	1.3	75	unknown	0	0. unknown	NULL
	Magnoliopsida	13	Proteales	61	uncertain	105	Proteacidites thalmanii	262	835	Angiosperm	1	Camp	1	Miller et al., 2013; Lohrengel, 1969	16	NULL	Kaiparowits	29	47.0771	-84.6912	47.1198	-86.5814	46.1384	-88.9224	37.6288	-111.859	75.5	1.3	75	unknown	0	0. unknown	NULL
	uncertain	23	uncertain	80	uncertain	105	Reticulatasporites spp	284	870	Fern/Moss	2	Camp	1	Miller et al., 2013; Lohrengel, 1969	16	NULL	Kaiparowits	29	47.0771	-84.6912	47.1198	-86.5814	46.1384	-88.9224	37.6288	-111.859	75.5	1.3	75	upland forest	1	1. upland forest	NULL
	Sphagnopsida	22	Sphagnales	76	Sphagnaceae	99	Sphagnumsporites sp.	322	970	Fern/Moss	2	Camp	1	Miller et al., 2013; Lohrengel, 1969	16	NULL	Kaiparowits	29	47.0771	-84.6912	47.1198	-86.5814	46.1384	-88.9224	37.6288	-111.859	75.5	1.3	75	swampy, lagoonal	3	3. swampy, lagoonal	NULL
	Magnoliopsida	13	Ericales?	25	Sapotaceae?	92	Tetracolporopollenites abditus	345	1021	Angiosperm	1	Camp	1	Miller et al., 2013; Lohrengel, 1969	16	NULL	Kaiparowits	29	47.0771	-84.6912	47.1198	-86.5814	46.1384	-88.9224	37.6288	-111.859	75.5	1.3	75	open scrubland	8	8. open scrubland	NULL
	Magnoliopsida	13	Magnoliales?	39	uncertain	105	Tricolpites cf. T. thomasii	358	1055	Angiosperm	1	Camp	1	Miller et al., 2013; Lohrengel, 1969	16	NULL	Kaiparowits	29	47.0771	-84.6912	47.1198	-86.5814	46.1384	-88.9224	37.6288	-111.859	75.5	1.3	75	coastal plain	4	4. coastal plain	NULL
	Magnoliopsida	13	Magnoliales?	39	uncertain	105	Tricolpites erugatus	358	1058	Angiosperm	1	Camp	1	Miller et al., 2013; Lohrengel, 1969	16	NULL	Kaiparowits	29	47.0771	-84.6912	47.1198	-86.5814	46.1384	-88.9224	37.6288	-111.859	75.5	1.3	75	coastal plain	4	4. coastal plain	NULL
	Magnoliopsida	13	Magnoliales?	39	uncertain	105	Tricolpites membranus	358	1065	Angiosperm	1	Camp	1	Miller et al., 2013; Lohrengel, 1969	16	NULL	Kaiparowits	29	47.0771	-84.6912	47.1198	-86.5814	46.1384	-88.9224	37.6288	-111.859	75.5	1.3	75	coastal plain	4	4. coastal plain	NULL
	Magnoliopsida	13	Magnoliales?	39	uncertain	105	Tricolpites reticulata	358	1075	Angiosperm	1	Camp	1	Miller et al., 2013; Lohrengel, 1969	16	NULL	Kaiparowits	29	47.0771	-84.6912	47.1198	-86.5814	46.1384	-88.9224	37.6288	-111.859	75.5	1.3	75	coastal plain	4	4. coastal plain	NULL
	Magnoliopsida	13	Magnoliales?	39	uncertain	105	Tricolpites sp.	358	1078	Angiosperm	1	Camp	1	Miller et al., 2013; Lohrengel, 1969	16	NULL	Kaiparowits	29	47.0771	-84.6912	47.1198	-86.5814	46.1384	-88.9224	37.6288	-111.859	75.5	1.3	75	coastal plain	4	4. coastal plain	NULL
	uncertain	23	uncertain	80	uncertain	105	Tricolpopollenites parvulus	359	1089	Angiosperm	1	Camp	1	Miller et al., 2013; Lohrengel, 1969	16	NULL	Kaiparowits	29	47.0771	-84.6912	47.1198	-86.5814	46.1384	-88.9224	37.6288	-111.859	75.5	1.3	75	coastal plain	4	4. coastal plain	NULL
	uncertain	23	uncertain	80	uncertain	105	Tricolpopollenites sp.	359	1092	Angiosperm	1	Camp	1	Miller et al., 2013; Lohrengel, 1969	16	NULL	Kaiparowits	29	47.0771	-84.6912	47.1198	-86.5814	46.1384	-88.9224	37.6288	-111.859	75.5	1.3	75	coastal plain	4	4. coastal plain	NULL
	Magnoliopsida	13	Malpighiales	40	Euphorbiaceae	43	Tricolporapollenites microreticulatus	360	1095	Angiosperm	1	Camp	1	Miller et al., 2013; Lohrengel, 1969	16	NULL	Kaiparowits	29	47.0771	-84.6912	47.1198	-86.5814	46.1384	-88.9224	37.6288	-111.859	75.5	1.3	75	temperate lowland forest	2	2. temperate lowland forest	NULL
	Magnoliopsida	13	Malpighiales	40	Euphorbiaceae	43	Tricolporapollenites spp.	360	1096	Angiosperm	1	Camp	1	Miller et al., 2013; Lohrengel, 1969	16	NULL	Kaiparowits	29	47.0771	-84.6912	47.1198	-86.5814	46.1384	-88.9224	37.6288	-111.859	75.5	1.3	75	temperate lowland forest	2	2. temperate lowland forest	NULL
	Magnoliopsida	13	Magnoliales?	39	uncertain	105	Tricolporites prolata	361	1099	Angiosperm	1	Camp	1	Miller et al., 2013; Lohrengel, 1969	16	NULL	Kaiparowits	29	47.0771	-84.6912	47.1198	-86.5814	46.1384	-88.9224	37.6288	-111.859	75.5	1.3	75	temperate lowland forest	2	2. temperate lowland forest	NULL
	Polypodiopsida	18	uncertain	80	uncertain	105	Triplanosporites sp.	368	1122	Fern/Moss	2	Camp	1	Miller et al., 2013; Lohrengel, 1969	16	NULL	Kaiparowits	29	47.0771	-84.6912	47.1198	-86.5814	46.1384	-88.9224	37.6288	-111.859	75.5	1.3	75	tropical lowland forest	6	6. tropical lowland forest	NULL
	Magnoliopsida	13	Santalales?	66	Santalaceae?	90	Aquilapollenites quadrilobus	22	124	Angiosperm	1	Camp	1	Nichols and Bryant, 1986a	17	NULL	Currant Creek	15	49.5403	-82.5575	49.5982	-84.4859	48.6294	-86.8995	40.3694	-110.889	77.45	2.25	75	temperate lowland forest	2	2. temperate lowland forest	NULL
	Liliopsida	10	Arecales	6	uncertain	105	Arecipites sp.	25	155	Angiosperm	1	Camp	1	Nichols and Bryant, 1986a	17	NULL	Mesaverde	31	49.5403	-82.5575	49.5982	-84.4859	48.6294	-86.8995	40.3694	-110.889	77.45	2.25	75	swampy, lagoonal	3	3. swampy, lagoonal	NULL
	Pinopsida	16	Pinales	54	Araucariaceae	10	Balmeisporites sp.	31	191	Gymnosperm	3	Camp	1	Nichols and Bryant, 1986a	17	NULL	Currant Creek	15	49.5403	-82.5575	49.5982	-84.4859	48.6294	-86.8995	40.3694	-110.889	77.45	2.25	75	coastal plain	4	4. coastal plain	NULL
	Lycopodiopsida	12	Lycopodiales	36	uncertain	105	Camarozonosporites insignis	44	225	Fern/Moss	2	Camp	1	Nichols and Bryant, 1986a	17	NULL	Mesaverde	31	49.5403	-82.5575	49.5982	-84.4859	48.6294	-86.8995	40.3694	-110.889	77.45	2.25	75	coastal plain	4	4. coastal plain	NULL
	Pinopsida	16	uncertain	80	uncertain	105	Corollina sp.	76	320	Gymnosperm	3	Camp	1	Nichols and Bryant, 1986a	17	NULL	Currant Creek	15	49.5403	-82.5575	49.5982	-84.4859	48.6294	-86.8995	40.3694	-110.889	77.45	2.25	75	temperate lowland forest	2	2. temperate lowland forest	NULL
	Pinopsida	16	uncertain	80	uncertain	105	Corollina sp.	76	320	Gymnosperm	3	Camp	1	Nichols and Bryant, 1986a	17	NULL	Mesaverde	31	49.5403	-82.5575	49.5982	-84.4859	48.6294	-86.8995	40.3694	-110.889	77.45	2.25	75	temperate lowland forest	2	2. temperate lowland forest	NULL
	Magnoliopsida	13	Sapindales	67	Sapindaceae	91	Cupanieidites sp.	79	337	Angiosperm	1	Camp	1	Nichols and Bryant, 1986a	17	NULL	Currant Creek	15	49.5403	-82.5575	49.5982	-84.4859	48.6294	-86.8995	40.3694	-110.889	77.45	2.25	75	wet, successional	5	5. wet, successional	NULL
	Magnoliopsida	13	Sapindales	67	Sapindaceae	91	Cupanieidites sp.	79	337	Angiosperm	1	Camp	1	Nichols and Bryant, 1986a	17	NULL	Mesaverde	31	49.5403	-82.5575	49.5982	-84.4859	48.6294	-86.8995	40.3694	-110.889	77.45	2.25	75	wet, successional	5	5. wet, successional	NULL
	Magnoliopsida	13	uncertain	80	uncertain	105	Cupuliferoidaepollenites minutus	80	339	Angiosperm	1	Camp	1	Nichols and Bryant, 1986a	17	NULL	Currant Creek	15	49.5403	-82.5575	49.5982	-84.4859	48.6294	-86.8995	40.3694	-110.889	77.45	2.25	75	swampy, lagoonal	3	3. swampy, lagoonal	NULL
	Magnoliopsida	13	uncertain	80	uncertain	105	Cupuliferoidaepollenites minutus	80	339	Angiosperm	1	Camp	1	Nichols and Bryant, 1986a	17	NULL	Mesaverde	31	49.5403	-82.5575	49.5982	-84.4859	48.6294	-86.8995	40.3694	-110.889	77.45	2.25	75	swampy, lagoonal	3	3. swampy, lagoonal	NULL
	Magnoliopsida	13	Fagales	28	Fagaceae	47	Cupuliferoipollenites sp.	81	344	Angiosperm	1	Camp	1	Nichols and Bryant, 1986a	17	NULL	Mesaverde	31	49.5403	-82.5575	49.5982	-84.4859	48.6294	-86.8995	40.3694	-110.889	77.45	2.25	75	swampy, lagoonal	3	3. swampy, lagoonal	NULL
	Polypodiopsida	18	Cyatheales?	17	Cyatheaceae?	32	Cyathidites minor	82	349	Fern/Moss	2	Camp	1	Nichols and Bryant, 1986a	17	NULL	Currant Creek	15	49.5403	-82.5575	49.5982	-84.4859	48.6294	-86.8995	40.3694	-110.889	77.45	2.25	75	temperate lowland forest	2	2. temperate lowland forest	NULL
	Polypodiopsida	18	Cyatheales?	17	Cyatheaceae?	32	Cyathidites minor	82	349	Fern/Moss	2	Camp	1	Nichols and Bryant, 1986a	17	NULL	Mesaverde	31	49.5403	-82.5575	49.5982	-84.4859	48.6294	-86.8995	40.3694	-110.889	77.45	2.25	75	temperate lowland forest	2	2. temperate lowland forest	NULL
	Cycadopsida	5	Cycadales?	19	uncertain	105	Cycadopites sp.	84	361	Gymnosperm	3	Camp	1	Nichols and Bryant, 1986a	17	NULL	Currant Creek	15	49.5403	-82.5575	49.5982	-84.4859	48.6294	-86.8995	40.3694	-110.889	77.45	2.25	75	tropical lowland forest	6	6. tropical lowland forest	NULL
	Cycadopsida	5	Cycadales?	19	uncertain	105	Cycadopites sp.	84	361	Gymnosperm	3	Camp	1	Nichols and Bryant, 1986a	17	NULL	Mesaverde	31	49.5403	-82.5575	49.5982	-84.4859	48.6294	-86.8995	40.3694	-110.889	77.45	2.25	75	tropical lowland forest	6	6. tropical lowland forest	NULL
	Lycopodiopsida	12	Selaginellales	73	Selaginellaceae?	96	Echinatisporis varispinosus	97	389	Fern/Moss	2	Camp	1	Nichols and Bryant, 1986a	17	NULL	Mesaverde	31	49.5403	-82.5575	49.5982	-84.4859	48.6294	-86.8995	40.3694	-110.889	77.45	2.25	75	estuarine, aquatic	7	7. estuarine, aquatic	NULL
	Gnetopsida	8	Ephedrales	21	Ephedraceae	38	Ephedra sp.	104	400	Gymnosperm	3	Camp	1	Nichols and Bryant, 1986a	17	NULL	Mesaverde	31	49.5403	-82.5575	49.5982	-84.4859	48.6294	-86.8995	40.3694	-110.889	77.45	2.25	75	open scrubland	8	8. open scrubland	NULL
	Cycadopsida	5	Cycadales	18	uncertain	105	Eucommiidites minor	110	432	Gymnosperm	3	Camp	1	Nichols and Bryant, 1986a	17	NULL	Mesaverde	31	49.5403	-82.5575	49.5982	-84.4859	48.6294	-86.8995	40.3694	-110.889	77.45	2.25	75	coastal plain	4	4. coastal plain	NULL
	Polypodiopsida	18	Gleicheniales	30	Gleicheniaceae	49	Gleicheniidites senonicus	128	482	Fern/Moss	2	Camp	1	Nichols and Bryant, 1986a	17	NULL	Mesaverde	31	49.5403	-82.5575	49.5982	-84.4859	48.6294	-86.8995	40.3694	-110.889	77.45	2.25	75	swampy, lagoonal	3	3. swampy, lagoonal	NULL
	Polypodiopsida?	19	uncertain	80	uncertain	105	Hazaria cf. H. canadiana	138	505	Fern/Moss	2	Camp	1	Nichols and Bryant, 1986a	17	NULL	Mesaverde	31	49.5403	-82.5575	49.5982	-84.4859	48.6294	-86.8995	40.3694	-110.889	77.45	2.25	75	unknown	0	0. unknown	NULL
	Pinopsida	16	Pinales?	55	uncertain	105	Inaperturopollenites sp.	147	527	Gymnosperm	3	Camp	1	Nichols and Bryant, 1986a	17	NULL	Mesaverde	31	49.5403	-82.5575	49.5982	-84.4859	48.6294	-86.8995	40.3694	-110.889	77.45	2.25	75	temperate lowland forest	2	2. temperate lowland forest	NULL
	uncertain	23	uncertain	80	uncertain	105	Isnetes sp.	154	543	Fern/Moss	2	Camp	1	Nichols and Bryant, 1986a	17	NULL	Mesaverde	31	49.5403	-82.5575	49.5982	-84.4859	48.6294	-86.8995	40.3694	-110.889	77.45	2.25	75	unknown	0	0. unknown	NULL
	Magnoliopsida	13	Fagales	28	uncertain	105	Kurtzipites sp.	156	553	Angiosperm	1	Camp	1	Nichols and Bryant, 1986a	17	NULL	Currant Creek	15	49.5403	-82.5575	49.5982	-84.4859	48.6294	-86.8995	40.3694	-110.889	77.45	2.25	75	temperate lowland forest	2	2. temperate lowland forest	NULL
	Polypodiopsida	18	uncertain	80	uncertain	105	Laevigatosporites haardti	158	565	Fern/Moss	2	Camp	1	Nichols and Bryant, 1986a	17	NULL	Currant Creek	15	49.5403	-82.5575	49.5982	-84.4859	48.6294	-86.8995	40.3694	-110.889	77.45	2.25	75	coastal plain	4	4. coastal plain	NULL
	Polypodiopsida	18	uncertain	80	uncertain	105	Laevigatosporites haardti	158	565	Fern/Moss	2	Camp	1	Nichols and Bryant, 1986a	17	NULL	Mesaverde	31	49.5403	-82.5575	49.5982	-84.4859	48.6294	-86.8995	40.3694	-110.889	77.45	2.25	75	coastal plain	4	4. coastal plain	NULL
	Lycopodiopsida	12	Lycopodiales	36	Lycopodiaceae	61	Lycopodiumsporites sp.	175	621	Fern/Moss	2	Camp	1	Nichols and Bryant, 1986a	17	NULL	Mesaverde	31	49.5403	-82.5575	49.5982	-84.4859	48.6294	-86.8995	40.3694	-110.889	77.45	2.25	75	upland forest	1	1. upland forest	NULL
	Magnoliopsida	13	Malpighiales?	41	Euphorbiaceae?	44	Nyssapollenites spp.	210	711	Angiosperm	1	Camp	1	Nichols and Bryant, 1986a	17	NULL	Mesaverde	31	49.5403	-82.5575	49.5982	-84.4859	48.6294	-86.8995	40.3694	-110.889	77.45	2.25	75	wet, successional	5	5. wet, successional	NULL
	Liliopsida?	11	Arecales?	7	Arecaceae?	12	Pandaniidites radicus	221	732	Angiosperm	1	Camp	1	Nichols and Bryant, 1986a	17	NULL	Currant Creek	15	49.5403	-82.5575	49.5982	-84.4859	48.6294	-86.8995	40.3694	-110.889	77.45	2.25	75	swampy, lagoonal	3	3. swampy, lagoonal	NULL
	Ginkgoopsida?	7	uncertain	80	uncertain	105	Pityosporites spp.	243	774	Gymnosperm	3	Camp	1	Nichols and Bryant, 1986a	17	NULL	Currant Creek	15	49.5403	-82.5575	49.5982	-84.4859	48.6294	-86.8995	40.3694	-110.889	77.45	2.25	75	coastal plain	4	4. coastal plain	NULL
	Ginkgoopsida?	7	uncertain	80	uncertain	105	Pityosporites spp.	243	774	Gymnosperm	3	Camp	1	Nichols and Bryant, 1986a	17	NULL	Mesaverde	31	49.5403	-82.5575	49.5982	-84.4859	48.6294	-86.8995	40.3694	-110.889	77.45	2.25	75	coastal plain	4	4. coastal plain	NULL
	Magnoliopsida	13	Proteales	61	uncertain	105	Proteacidites retusus	262	831	Angiosperm	1	Camp	1	Nichols and Bryant, 1986a	17	NULL	Currant Creek	15	49.5403	-82.5575	49.5982	-84.4859	48.6294	-86.8995	40.3694	-110.889	77.45	2.25	75	unknown	0	0. unknown	NULL
	Magnoliopsida	13	Proteales	61	uncertain	105	Proteacidites retusus	262	831	Angiosperm	1	Camp	1	Nichols and Bryant, 1986a	17	NULL	Mesaverde	31	49.5403	-82.5575	49.5982	-84.4859	48.6294	-86.8995	40.3694	-110.889	77.45	2.25	75	unknown	0	0. unknown	NULL
	Magnoliopsida	13	Proteales	61	uncertain	105	Proteacidites spp.	262	833	Angiosperm	1	Camp	1	Nichols and Bryant, 1986a	17	NULL	Currant Creek	15	49.5403	-82.5575	49.5982	-84.4859	48.6294	-86.8995	40.3694	-110.889	77.45	2.25	75	unknown	0	0. unknown	NULL
	Magnoliopsida	13	Proteales	61	uncertain	105	Proteacidites spp.	262	833	Angiosperm	1	Camp	1	Nichols and Bryant, 1986a	17	NULL	Mesaverde	31	49.5403	-82.5575	49.5982	-84.4859	48.6294	-86.8995	40.3694	-110.889	77.45	2.25	75	unknown	0	0. unknown	NULL
	Magnoliopsida	13	Apiales	3	Araliaceae	9	Rhoipites spp.	292	905	Angiosperm	1	Camp	1	Nichols and Bryant, 1986a	17	NULL	Mesaverde	31	49.5403	-82.5575	49.5982	-84.4859	48.6294	-86.8995	40.3694	-110.889	77.45	2.25	75	swampy, lagoonal	3	3. swampy, lagoonal	NULL
	Pinopsida	16	uncertain	80	uncertain	105	Rugubivesiculites sp.	297	915	Gymnosperm	3	Camp	1	Nichols and Bryant, 1986a	17	NULL	Mesaverde	31	49.5403	-82.5575	49.5982	-84.4859	48.6294	-86.8995	40.3694	-110.889	77.45	2.25	75	coastal plain	4	4. coastal plain	NULL
	Lycopodiopsida	12	Lycopodiales	36	Lycopodiaceae	61	Sestrosporites pseudoalveolatus	313	951	Fern/Moss	2	Camp	1	Nichols and Bryant, 1986a	17	NULL	Mesaverde	31	49.5403	-82.5575	49.5982	-84.4859	48.6294	-86.8995	40.3694	-110.889	77.45	2.25	75	upland forest	1	1. upland forest	NULL
	Bryopsida	3	uncertain	80	uncertain	105	Stereisporites antiquus	329	988	Fern/Moss	2	Camp	1	Nichols and Bryant, 1986a	17	NULL	Mesaverde	31	49.5403	-82.5575	49.5982	-84.4859	48.6294	-86.8995	40.3694	-110.889	77.45	2.25	75	coastal plain	4	4. coastal plain	NULL
	Pinopsida	16	Pinales	54	Cupressaceae?	30	Taxodiaceaepollenites hiatus	343	1015	Gymnosperm	3	Camp	1	Nichols and Bryant, 1986a	17	NULL	Currant Creek	15	49.5403	-82.5575	49.5982	-84.4859	48.6294	-86.8995	40.3694	-110.889	77.45	2.25	75	temperate lowland forest	2	2. temperate lowland forest	NULL
	Pinopsida	16	Pinales	54	Cupressaceae?	30	Taxodiaceaepollenites hiatus	343	1015	Gymnosperm	3	Camp	1	Nichols and Bryant, 1986a	17	NULL	Mesaverde	31	49.5403	-82.5575	49.5982	-84.4859	48.6294	-86.8995	40.3694	-110.889	77.45	2.25	75	temperate lowland forest	2	2. temperate lowland forest	NULL
	Magnoliopsida	13	Magnoliales?	39	uncertain	105	Tricolpites interangulus	358	1062	Angiosperm	1	Camp	1	Nichols and Bryant, 1986a	17	NULL	Currant Creek	15	49.5403	-82.5575	49.5982	-84.4859	48.6294	-86.8995	40.3694	-110.889	77.45	2.25	75	temperate lowland forest	2	2. temperate lowland forest	NULL
	Magnoliopsida	13	Magnoliales?	39	uncertain	105	Tricolpites spp.	358	1079	Angiosperm	1	Camp	1	Nichols and Bryant, 1986a	17	NULL	Currant Creek	15	49.5403	-82.5575	49.5982	-84.4859	48.6294	-86.8995	40.3694	-110.889	77.45	2.25	75	coastal plain	4	4. coastal plain	NULL
	Magnoliopsida	13	Magnoliales?	39	uncertain	105	Tricolpites spp.	358	1079	Angiosperm	1	Camp	1	Nichols and Bryant, 1986a	17	NULL	Mesaverde	31	49.5403	-82.5575	49.5982	-84.4859	48.6294	-86.8995	40.3694	-110.889	77.45	2.25	75	coastal plain	4	4. coastal plain	NULL
	Magnoliopsida	13	Fagales	28	Juglandaceae	55	Trudopollis sp.	375	1149	Angiosperm	1	Camp	1	Nichols and Bryant, 1986a	17	NULL	Mesaverde	31	49.5403	-82.5575	49.5982	-84.4859	48.6294	-86.8995	40.3694	-110.889	77.45	2.25	75	temperate lowland forest	2	2. temperate lowland forest	NULL
	Magnoliopsida	13	Rosales	63	Ulmaceae	102	Ulmipollenites sp.	380	1162	Angiosperm	1	Camp	1	Nichols and Bryant, 1986a	17	NULL	Currant Creek	15	49.5403	-82.5575	49.5982	-84.4859	48.6294	-86.8995	40.3694	-110.889	77.45	2.25	75	temperate lowland forest	2	2. temperate lowland forest	NULL
	Pteridospermatopsida?	21	Caytoniales?	11	Caytoniaceae?	22	Vitreisporites pallidus	393	1186	Gymnosperm	3	Camp	1	Nichols and Bryant, 1986a	17	NULL	Mesaverde	31	49.5403	-82.5575	49.5982	-84.4859	48.6294	-86.8995	40.3694	-110.889	77.45	2.25	75	temperate lowland forest	2	2. temperate lowland forest	NULL
	Marchantiopsida	15	uncertain	80	uncertain	105	Zlivisporis novomexicanum	397	1200	Fern/Moss	2	Camp	1	Nichols and Bryant, 1986a	17	NULL	Currant Creek	15	49.5403	-82.5575	49.5982	-84.4859	48.6294	-86.8995	40.3694	-110.889	77.45	2.25	75	swampy, lagoonal	3	3. swampy, lagoonal	NULL
	Polypodiopsida	18	Schizaeales	71	uncertain	105	Appendicisporites spp.	21	56	Fern/Moss	2	Camp	1	Nichols and Bryant, 1986b	18	NULL	Adaville	1	49.5352	-81.6163	49.5999	-83.5435	48.6372	-85.9753	40.7917	-111.23	73.15	3.25	75	temperate lowland forest	2	2. temperate lowland forest	NULL
	Pinopsida	16	Pinales	54	Araucariaceae	10	Araucariacites sp.	24	149	Gymnosperm	3	Camp	1	Nichols and Bryant, 1986b	18	NULL	Adaville	1	49.5352	-81.6163	49.5999	-83.5435	48.6372	-85.9753	40.7917	-111.23	73.15	3.25	75	coastal plain	4	4. coastal plain	NULL
	Polypodiopsida	18	Schizaeales	71	Schizaeaceae	93	Cicatricosisporites spp.	58	274	Fern/Moss	2	Camp	1	Nichols and Bryant, 1986b	18	NULL	Adaville	1	49.5352	-81.6163	49.5999	-83.5435	48.6372	-85.9753	40.7917	-111.23	73.15	3.25	75	temperate lowland forest	2	2. temperate lowland forest	NULL
	Bryopsida	3	uncertain	80	uncertain	105	Cingutriletes cf. C. clavus	61	287	Fern/Moss	2	Camp	1	Nichols and Bryant, 1986b	18	NULL	Adaville	1	49.5352	-81.6163	49.5999	-83.5435	48.6372	-85.9753	40.7917	-111.23	73.15	3.25	75	coastal plain	4	4. coastal plain	NULL
	Pinopsida	16	uncertain	80	uncertain	105	Corollina sp.	76	320	Gymnosperm	3	Camp	1	Nichols and Bryant, 1986b	18	NULL	Adaville	1	49.5352	-81.6163	49.5999	-83.5435	48.6372	-85.9753	40.7917	-111.23	73.15	3.25	75	temperate lowland forest	2	2. temperate lowland forest	NULL
	Polypodiopsida	18	Cyatheales?	17	Cyatheaceae?	32	Cyathidites minor	82	349	Fern/Moss	2	Camp	1	Nichols and Bryant, 1986b	18	NULL	Adaville	1	49.5352	-81.6163	49.5999	-83.5435	48.6372	-85.9753	40.7917	-111.23	73.15	3.25	75	temperate lowland forest	2	2. temperate lowland forest	NULL
	Polypodiopsida	18	Gleicheniales	30	Gleicheniaceae	49	Gleicheniidites senonicus	128	482	Fern/Moss	2	Camp	1	Nichols and Bryant, 1986b	18	NULL	Adaville	1	49.5352	-81.6163	49.5999	-83.5435	48.6372	-85.9753	40.7917	-111.23	73.15	3.25	75	swampy, lagoonal	3	3. swampy, lagoonal	NULL
	Polypodiopsida	18	uncertain	80	uncertain	105	Laevigatosporites haardti	158	565	Fern/Moss	2	Camp	1	Nichols and Bryant, 1986b	18	NULL	Adaville	1	49.5352	-81.6163	49.5999	-83.5435	48.6372	-85.9753	40.7917	-111.23	73.15	3.25	75	coastal plain	4	4. coastal plain	NULL
	Polypodiopsida	18	uncertain	80	uncertain	105	Microreticulatisporites spp.	187	662	Fern/Moss	2	Camp	1	Nichols and Bryant, 1986b	18	NULL	Adaville	1	49.5352	-81.6163	49.5999	-83.5435	48.6372	-85.9753	40.7917	-111.23	73.15	3.25	75	wet, successional	5	5. wet, successional	NULL
	Magnoliopsida	13	uncertain	80	uncertain	105	Proteacidites spp.	262	833	Angiosperm	1	Camp	1	Nichols and Bryant, 1986b	18	NULL	Adaville	1	49.5352	-81.6163	49.5999	-83.5435	48.6372	-85.9753	40.7917	-111.23	73.15	3.25	75	unknown	0	0. unknown	NULL
	Pinopsida	16	Pinales	54	Cupressaceae?	30	Taxodiaceaepollenites hiatus	343	1015	Gymnosperm	3	Camp	1	Nichols and Bryant, 1986b	18	NULL	Adaville	1	49.5352	-81.6163	49.5999	-83.5435	48.6372	-85.9753	40.7917	-111.23	73.15	3.25	75	temperate lowland forest	2	2. temperate lowland forest	NULL
	Magnoliopsida	13	Magnoliales?	39	uncertain	105	Tricolpites spp.	358	1079	Angiosperm	1	Camp	1	Nichols and Bryant, 1986b	18	NULL	Adaville	1	49.5352	-81.6163	49.5999	-83.5435	48.6372	-85.9753	40.7917	-111.23	73.15	3.25	75	coastal plain	4	4. coastal plain	NULL
	Pteridospermatopsida?	21	Caytoniales?	11	Caytoniaceae?	22	Vitreisporites pallidus	393	1186	Gymnosperm	3	Camp	1	Nichols and Bryant, 1986b	18	NULL	Adaville	1	49.5352	-81.6163	49.5999	-83.5435	48.6372	-85.9753	40.7917	-111.23	73.15	3.25	75	temperate lowland forest	2	2. temperate lowland forest	NULL
	Polypodiopsida	18	Schizaeales	71	uncertain	105	Appendicisporites spp.	21	56	Fern/Moss	2	Camp	1	Nichols and Bryant, 1986b	18	NULL	Echo Canyon Conglomerate	18	49.7384	-81.7859	49.8018	-83.7168	48.838	-86.1484	40.9678	-111.428	77.9	5.7	80	temperate lowland forest	2	2. temperate lowland forest	NULL
	Polypodiopsida	18	Schizaeales	71	Schizaeaceae	93	Cicatricosisporites spp.	58	274	Fern/Moss	2	Camp	1	Nichols and Bryant, 1986b	18	NULL	Echo Canyon Conglomerate	18	49.7384	-81.7859	49.8018	-83.7168	48.838	-86.1484	40.9678	-111.428	77.9	5.7	80	temperate lowland forest	2	2. temperate lowland forest	NULL
	Pinopsida	16	uncertain	80	uncertain	105	Corollina sp.	76	320	Gymnosperm	3	Camp	1	Nichols and Bryant, 1986b	18	NULL	Echo Canyon Conglomerate	18	49.7384	-81.7859	49.8018	-83.7168	48.838	-86.1484	40.9678	-111.428	77.9	5.7	80	temperate lowland forest	2	2. temperate lowland forest	NULL
	Magnoliopsida	13	uncertain	80	uncertain	105	Cupuliferoidaepollenites minutus	80	339	Angiosperm	1	Camp	1	Nichols and Bryant, 1986b	18	NULL	Echo Canyon Conglomerate	18	49.7384	-81.7859	49.8018	-83.7168	48.838	-86.1484	40.9678	-111.428	77.9	5.7	80	swampy, lagoonal	3	3. swampy, lagoonal	NULL
	Polypodiopsida	18	Cyatheales?	17	Cyatheaceae?	32	Cyathidites minor	82	349	Fern/Moss	2	Camp	1	Nichols and Bryant, 1986b	18	NULL	Echo Canyon Conglomerate	18	49.7384	-81.7859	49.8018	-83.7168	48.838	-86.1484	40.9678	-111.428	77.9	5.7	80	temperate lowland forest	2	2. temperate lowland forest	NULL
	Lycopodiopsida	12	Selaginellales?	74	Selaginellaceae?	96	Echinatisporis varispinosus	97	389	Fern/Moss	2	Camp	1	Nichols and Bryant, 1986b	18	NULL	Echo Canyon Conglomerate	18	49.7384	-81.7859	49.8018	-83.7168	48.838	-86.1484	40.9678	-111.428	77.9	5.7	80	estuarine, aquatic	7	7. estuarine, aquatic	NULL
	Magnoliopsida	13	Buxales	8	Buxaceae	20	Erdtmanipollis pachysandroides	107	422	Angiosperm	1	Camp	1	Nichols and Bryant, 1986b	18	NULL	Echo Canyon Conglomerate	18	49.7384	-81.7859	49.8018	-83.7168	48.838	-86.1484	40.9678	-111.428	77.9	5.7	80	temperate lowland forest	2	2. temperate lowland forest	NULL
	Lycopodiopsida	12	Selaginellales	73	Selaginellaceae	95	Foveosporites sp.	118	453	Fern/Moss	2	Camp	1	Nichols and Bryant, 1986b	18	NULL	Echo Canyon Conglomerate	18	49.7384	-81.7859	49.8018	-83.7168	48.838	-86.1484	40.9678	-111.428	77.9	5.7	80	temperate lowland forest	2	2. temperate lowland forest	NULL
	Polypodiopsida	18	Gleicheniales	30	Gleicheniaceae	49	Gleicheniidites senonicus	128	482	Fern/Moss	2	Camp	1	Nichols and Bryant, 1986b	18	NULL	Echo Canyon Conglomerate	18	49.7384	-81.7859	49.8018	-83.7168	48.838	-86.1484	40.9678	-111.428	77.9	5.7	80	swampy, lagoonal	3	3. swampy, lagoonal	NULL
	Polypodiopsida	18	uncertain	80	uncertain	105	Laevigatosporites haardti	158	565	Fern/Moss	2	Camp	1	Nichols and Bryant, 1986b	18	NULL	Echo Canyon Conglomerate	18	49.7384	-81.7859	49.8018	-83.7168	48.838	-86.1484	40.9678	-111.428	77.9	5.7	80	coastal plain	4	4. coastal plain	NULL
	Lycopodiopsida	12	Lycopodiales	36	Lycopodiaceae	61	Lycopodiumsporites sp.	175	621	Fern/Moss	2	Camp	1	Nichols and Bryant, 1986b	18	NULL	Echo Canyon Conglomerate	18	49.7384	-81.7859	49.8018	-83.7168	48.838	-86.1484	40.9678	-111.428	77.9	5.7	80	upland forest	1	1. upland forest	NULL
	Ginkgoopsida?	7	uncertain	80	uncertain	105	Pityosporites spp.	243	774	Gymnosperm	3	Camp	1	Nichols and Bryant, 1986b	18	NULL	Echo Canyon Conglomerate	18	49.7384	-81.7859	49.8018	-83.7168	48.838	-86.1484	40.9678	-111.428	77.9	5.7	80	coastal plain	4	4. coastal plain	NULL
	Magnoliopsida	13	Proteales	61	uncertain	105	Proteacidites retusus	262	831	Angiosperm	1	Camp	1	Nichols and Bryant, 1986b	18	NULL	Echo Canyon Conglomerate	18	49.7384	-81.7859	49.8018	-83.7168	48.838	-86.1484	40.9678	-111.428	77.9	5.7	80	unknown	0	0. unknown	NULL
	Liliopsida	10	Poales?	58	Juncaceae?	57	Quadripollis krempii	276	856	Angiosperm	1	Camp	1	Nichols and Bryant, 1986b	18	NULL	Echo Canyon Conglomerate	18	49.7384	-81.7859	49.8018	-83.7168	48.838	-86.1484	40.9678	-111.428	77.9	5.7	80	tropical lowland forest	6	6. tropical lowland forest	NULL
	Pinopsida	16	uncertain	80	uncertain	105	Rugubivesiculites sp.	297	915	Gymnosperm	3	Camp	1	Nichols and Bryant, 1986b	18	NULL	Echo Canyon Conglomerate	18	49.7384	-81.7859	49.8018	-83.7168	48.838	-86.1484	40.9678	-111.428	77.9	5.7	80	coastal plain	4	4. coastal plain	NULL
	Bryopsida	3	uncertain	80	uncertain	105	Stereisporites antiquasporites	329	987	Fern/Moss	2	Camp	1	Nichols and Bryant, 1986b	18	NULL	Echo Canyon Conglomerate	18	49.7384	-81.7859	49.8018	-83.7168	48.838	-86.1484	40.9678	-111.428	77.9	5.7	80	coastal plain	4	4. coastal plain	NULL
	Pinopsida	16	Pinales	54	Cupressaceae?	30	Taxodiaceaepollenites hiatus	343	1015	Gymnosperm	3	Camp	1	Nichols and Bryant, 1986b	18	NULL	Echo Canyon Conglomerate	18	49.7384	-81.7859	49.8018	-83.7168	48.838	-86.1484	40.9678	-111.428	77.9	5.7	80	temperate lowland forest	2	2. temperate lowland forest	NULL
	Magnoliopsida	13	Magnoliales?	39	uncertain	105	Tricolpites spp.	358	1079	Angiosperm	1	Camp	1	Nichols and Bryant, 1986b	18	NULL	Echo Canyon Conglomerate	18	49.7384	-81.7859	49.8018	-83.7168	48.838	-86.1484	40.9678	-111.428	77.9	5.7	80	coastal plain	4	4. coastal plain	NULL
	Pteridospermatopsida?	21	Caytoniales?	11	Caytoniaceae?	22	Vitreisporites pallidus	393	1186	Gymnosperm	3	Camp	1	Nichols and Bryant, 1986b	18	NULL	Echo Canyon Conglomerate	18	49.7384	-81.7859	49.8018	-83.7168	48.838	-86.1484	40.9678	-111.428	77.9	5.7	80	temperate lowland forest	2	2. temperate lowland forest	NULL
	Magnoliopsida	13	Santalales?	66	uncertain	105	Accuratipollis lactifluminis	5	11	Angiosperm	1	Camp	1	Payenburg et al., 2002	19	NULL	Milk River/Eagle	32	55.9593	-76.5094	56.0731	-78.717	55.1592	-81.572	47.4346	-109.704	82	2.1	80	swampy, lagoonal	3	3. swampy, lagoonal	Wolf
	Pinopsida	16	Pinales?	55	uncertain	105	Alisporites grandis	13	30	Gymnosperm	3	Camp	1	Payenburg et al., 2002	19	NULL	Milk River/Eagle	32	55.9593	-76.5094	56.0731	-78.717	55.1592	-81.572	47.4346	-109.704	82	2.1	80	coastal plain	4	4. coastal plain	Wolf
	Polypodiopsida	18	Schizaeales	71	uncertain	105	Appendicisporites undosus	21	58	Fern/Moss	2	Camp	1	Payenburg et al., 2002	19	NULL	Milk River/Eagle	32	55.9593	-76.5094	56.0731	-78.717	55.1592	-81.572	47.4346	-109.704	82	2.1	80	temperate lowland forest	2	2. temperate lowland forest	Wolf
	Magnoliopsida	13	Santalales?	66	Santalaceae?	90	Aquilapollenites quadrilobus	22	124	Angiosperm	1	Camp	1	Payenburg et al., 2002	19	NULL	Milk River/Eagle	32	55.9593	-76.5094	56.0731	-78.717	55.1592	-81.572	47.4346	-109.704	82	2.1	80	temperate lowland forest	2	2. temperate lowland forest	Wolf
	Magnoliopsida	13	Santalales?	66	Santalaceae?	90	Aquilapollenites rigidus	22	128	Angiosperm	1	Camp	1	Payenburg et al., 2002	19	NULL	Milk River/Eagle	32	55.9593	-76.5094	56.0731	-78.717	55.1592	-81.572	47.4346	-109.704	82	2.1	80	temperate lowland forest	2	2. temperate lowland forest	Wolf
	Magnoliopsida	13	Santalales?	66	Santalaceae?	90	Aquilapollenites senonicus	22	129	Angiosperm	1	Camp	1	Payenburg et al., 2002	19	NULL	Milk River/Eagle	32	55.9593	-76.5094	56.0731	-78.717	55.1592	-81.572	47.4346	-109.704	82	2.1	80	temperate lowland forest	2	2. temperate lowland forest	Wolf
	Magnoliopsida	13	Santalales?	66	Santalaceae?	90	Aquilapollenites sp.	22	131	Angiosperm	1	Camp	1	Payenburg et al., 2002	19	NULL	Milk River/Eagle	32	55.9593	-76.5094	56.0731	-78.717	55.1592	-81.572	47.4346	-109.704	82	2.1	80	temperate lowland forest	2	2. temperate lowland forest	Wolf
	Magnoliopsida	13	Santalales?	66	Santalaceae?	90	Aquilapollenites turbidus	22	141	Angiosperm	1	Camp	1	Payenburg et al., 2002	19	NULL	Milk River/Eagle	32	55.9593	-76.5094	56.0731	-78.717	55.1592	-81.572	47.4346	-109.704	82	2.1	80	temperate lowland forest	2	2. temperate lowland forest	Wolf
	Polypodiopsida	18	uncertain	80	uncertain	105	Baculatisporites comaumensis	30	181	Fern/Moss	2	Camp	1	Payenburg et al., 2002	19	NULL	Milk River/Eagle	32	55.9593	-76.5094	56.0731	-78.717	55.1592	-81.572	47.4346	-109.704	82	2.1	80	coastal plain	4	4. coastal plain	Wolf
	Polypodiopsida	18	Schizaeales	71	Schizaeaceae	93	Biretisporites deltoidus	38	206	Fern/Moss	2	Camp	1	Payenburg et al., 2002	19	NULL	Milk River/Eagle	32	55.9593	-76.5094	56.0731	-78.717	55.1592	-81.572	47.4346	-109.704	82	2.1	80	temperate lowland forest	2	2. temperate lowland forest	Wolf
	Cycadopsida?	6	Cycadales?	19	uncertain	105	Brevimonosulcites corrugatus	40	210	Gymnosperm	3	Camp	1	Payenburg et al., 2002	19	NULL	Milk River/Eagle	32	55.9593	-76.5094	56.0731	-78.717	55.1592	-81.572	47.4346	-109.704	82	2.1	80	temperate lowland forest	2	2. temperate lowland forest	Wolf
	Pinopsida	16	Pinales	54	uncertain	105	Callialasporites dampieri	42	213	Gymnosperm	3	Camp	1	Payenburg et al., 2002	19	NULL	Milk River/Eagle	32	55.9593	-76.5094	56.0731	-78.717	55.1592	-81.572	47.4346	-109.704	82	2.1	80	upland forest	1	1. upland forest	Wolf
	Lycopodiopsida	12	Lycopodiales	36	uncertain	105	Camarozonosporites insignis	44	225	Fern/Moss	2	Camp	1	Payenburg et al., 2002	19	NULL	Milk River/Eagle	32	55.9593	-76.5094	56.0731	-78.717	55.1592	-81.572	47.4346	-109.704	82	2.1	80	coastal plain	4	4. coastal plain	Wolf
	Lycopodiopsida	12	Lycopodiales	36	uncertain	105	Camarozonosporites sp.	44	226	Fern/Moss	2	Camp	1	Payenburg et al., 2002	19	NULL	Milk River/Eagle	32	55.9593	-76.5094	56.0731	-78.717	55.1592	-81.572	47.4346	-109.704	82	2.1	80	coastal plain	4	4. coastal plain	Wolf
	Polypodiopsida	18	Cyatheales?	17	Cibotiaceae?	28	Cibotiumspora juncta	57	252	Fern/Moss	2	Camp	1	Payenburg et al., 2002	19	NULL	Milk River/Eagle	32	55.9593	-76.5094	56.0731	-78.717	55.1592	-81.572	47.4346	-109.704	82	2.1	80	temperate lowland forest	2	2. temperate lowland forest	Wolf
	Polypodiopsida	18	Schizaeales	71	Schizaeaceae	93	Cicatricosisporites radiata	58	271	Fern/Moss	2	Camp	1	Payenburg et al., 2002	19	NULL	Milk River/Eagle	32	55.9593	-76.5094	56.0731	-78.717	55.1592	-81.572	47.4346	-109.704	82	2.1	80	temperate lowland forest	2	2. temperate lowland forest	Wolf
	Polypodiopsida	18	Schizaeales	71	Schizaeaceae	93	Cicatricosisporites sp.	58	273	Fern/Moss	2	Camp	1	Payenburg et al., 2002	19	NULL	Milk River/Eagle	32	55.9593	-76.5094	56.0731	-78.717	55.1592	-81.572	47.4346	-109.704	82	2.1	80	temperate lowland forest	2	2. temperate lowland forest	Wolf
	Bryopsida	3	uncertain	80	uncertain	105	Cingutriletes clavus	61	288	Fern/Moss	2	Camp	1	Payenburg et al., 2002	19	NULL	Milk River/Eagle	32	55.9593	-76.5094	56.0731	-78.717	55.1592	-81.572	47.4346	-109.704	82	2.1	80	coastal plain	4	4. coastal plain	Wolf
	Bryopsida	3	uncertain	80	uncertain	105	Cingutriletes simplex	61	289	Fern/Moss	2	Camp	1	Payenburg et al., 2002	19	NULL	Milk River/Eagle	32	55.9593	-76.5094	56.0731	-78.717	55.1592	-81.572	47.4346	-109.704	82	2.1	80	coastal plain	4	4. coastal plain	Wolf
	Marchantiopsida	15	uncertain	80	uncertain	105	Cirratriradites luminosus	64	293	Fern/Moss	2	Camp	1	Payenburg et al., 2002	19	NULL	Milk River/Eagle	32	55.9593	-76.5094	56.0731	-78.717	55.1592	-81.572	47.4346	-109.704	82	2.1	80	swampy, lagoonal	3	3. swampy, lagoonal	Wolf
	Polypodiopsida	18	Cyatheales?	17	Cyatheaceae?	32	Cyathidites minor	82	349	Fern/Moss	2	Camp	1	Payenburg et al., 2002	19	NULL	Milk River/Eagle	32	55.9593	-76.5094	56.0731	-78.717	55.1592	-81.572	47.4346	-109.704	82	2.1	80	temperate lowland forest	2	2. temperate lowland forest	Wolf
	Cycadopsida	5	Cycadales?	19	uncertain	105	Cycadopites fragilis	84	358	Gymnosperm	3	Camp	1	Payenburg et al., 2002	19	NULL	Milk River/Eagle	32	55.9593	-76.5094	56.0731	-78.717	55.1592	-81.572	47.4346	-109.704	82	2.1	80	tropical lowland forest	6	6. tropical lowland forest	Wolf
	Polypodiopsida	18	uncertain	80	uncertain	105	Deltoidospora diaphana	86	365	Fern/Moss	2	Camp	1	Payenburg et al., 2002	19	NULL	Milk River/Eagle	32	55.9593	-76.5094	56.0731	-78.717	55.1592	-81.572	47.4346	-109.704	82	2.1	80	temperate lowland forest	2	2. temperate lowland forest	Wolf
	Lycopodiopsida	12	Selaginellales?	74	Selaginellaceae?	96	Echinatisporis sp.	97	387	Fern/Moss	2	Camp	1	Payenburg et al., 2002	19	NULL	Milk River/Eagle	32	55.9593	-76.5094	56.0731	-78.717	55.1592	-81.572	47.4346	-109.704	82	2.1	80	estuarine, aquatic	7	7. estuarine, aquatic	Wolf
	Pinopsida	16	Voltziales	78	uncertain	105	Enzonalasporites bojatus	103	398	Gymnosperm	3	Camp	1	Payenburg et al., 2002	19	NULL	Milk River/Eagle	32	55.9593	-76.5094	56.0731	-78.717	55.1592	-81.572	47.4346	-109.704	82	2.1	80	tropical lowland forest	6	6. tropical lowland forest	Wolf
	Magnoliopsida	13	Santalales?	66	Santalaceae?	90	Fibulapollis scabratus	115	440	Angiosperm	1	Camp	1	Payenburg et al., 2002	19	NULL	Milk River/Eagle	32	55.9593	-76.5094	56.0731	-78.717	55.1592	-81.572	47.4346	-109.704	82	2.1	80	coastal plain	4	4. coastal plain	Wolf
	Bryopsida?	4	uncertain	80	uncertain	105	Foraminisporis sp.	116	443	Fern/Moss	2	Camp	1	Payenburg et al., 2002	19	NULL	Milk River/Eagle	32	55.9593	-76.5094	56.0731	-78.717	55.1592	-81.572	47.4346	-109.704	82	2.1	80	coastal plain	4	4. coastal plain	Wolf
	Bryopsida?	4	uncertain	80	uncertain	105	Foraminisporis wonthaggiensis	116	445	Fern/Moss	2	Camp	1	Payenburg et al., 2002	19	NULL	Milk River/Eagle	32	55.9593	-76.5094	56.0731	-78.717	55.1592	-81.572	47.4346	-109.704	82	2.1	80	coastal plain	4	4. coastal plain	Wolf
	Polypodiopsida	18	Gleicheniales	30	Gleicheniaceae	49	Gleicheniidites delicatus	128	481	Fern/Moss	2	Camp	1	Payenburg et al., 2002	19	NULL	Milk River/Eagle	32	55.9593	-76.5094	56.0731	-78.717	55.1592	-81.572	47.4346	-109.704	82	2.1	80	swampy, lagoonal	3	3. swampy, lagoonal	Wolf
	Polypodiopsida	18	Gleicheniales	30	Gleicheniaceae	49	Gleicheniidites senonicus	128	482	Fern/Moss	2	Camp	1	Payenburg et al., 2002	19	NULL	Milk River/Eagle	32	55.9593	-76.5094	56.0731	-78.717	55.1592	-81.572	47.4346	-109.704	82	2.1	80	swampy, lagoonal	3	3. swampy, lagoonal	Wolf
	Polypodiopsida?	19	uncertain	80	uncertain	105	Hazaria canadiana	138	504	Fern/Moss	2	Camp	1	Payenburg et al., 2002	19	NULL	Milk River/Eagle	32	55.9593	-76.5094	56.0731	-78.717	55.1592	-81.572	47.4346	-109.704	82	2.1	80	unknown	0	0. unknown	Wolf
	Polypodiopsida?	19	uncertain	80	uncertain	105	Hedlundisporites tricrassus	139	507	Fern/Moss	2	Camp	1	Payenburg et al., 2002	19	NULL	Milk River/Eagle	32	55.9593	-76.5094	56.0731	-78.717	55.1592	-81.572	47.4346	-109.704	82	2.1	80	open scrubland	8	8. open scrubland	Wolf
	Magnoliopsida	13	Magnoliales?	39	Annonaceae?	3	Inaperturotetradites scabratus	148	529	Angiosperm	1	Camp	1	Payenburg et al., 2002	19	NULL	Milk River/Eagle	32	55.9593	-76.5094	56.0731	-78.717	55.1592	-81.572	47.4346	-109.704	82	2.1	80	temperate lowland forest	2	2. temperate lowland forest	Wolf
	uncertain	23	uncertain	80	uncertain	105	Integricorpus clarireticulatus	149	531	Angiosperm	1	Camp	1	Payenburg et al., 2002	19	NULL	Milk River/Eagle	32	55.9593	-76.5094	56.0731	-78.717	55.1592	-81.572	47.4346	-109.704	82	2.1	80	coastal plain	4	4. coastal plain	Wolf
	Bryopsida?	4	uncertain	80	uncertain	105	Interulobites sp.	151	534	Fern/Moss	2	Camp	1	Payenburg et al., 2002	19	NULL	Milk River/Eagle	32	55.9593	-76.5094	56.0731	-78.717	55.1592	-81.572	47.4346	-109.704	82	2.1	80	coastal plain	4	4. coastal plain	Wolf
	Polypodiopsida	18	Schizaeales	71	Schizaeaceae	93	Klukisporites foveolatus	155	544	Fern/Moss	2	Camp	1	Payenburg et al., 2002	19	NULL	Milk River/Eagle	32	55.9593	-76.5094	56.0731	-78.717	55.1592	-81.572	47.4346	-109.704	82	2.1	80	tropical lowland forest	6	6. tropical lowland forest	Wolf
	Polypodiopsida	18	Cyatheales	16	Cyatheaceae	31	Kuylisporites scutatus	157	555	Fern/Moss	2	Camp	1	Payenburg et al., 2002	19	NULL	Milk River/Eagle	32	55.9593	-76.5094	56.0731	-78.717	55.1592	-81.572	47.4346	-109.704	82	2.1	80	tropical lowland forest	6	6. tropical lowland forest	Wolf
	Polypodiopsida	18	uncertain	80	uncertain	105	Laevigatosporites haardti	158	565	Fern/Moss	2	Camp	1	Payenburg et al., 2002	19	NULL	Milk River/Eagle	32	55.9593	-76.5094	56.0731	-78.717	55.1592	-81.572	47.4346	-109.704	82	2.1	80	coastal plain	4	4. coastal plain	Wolf
	Lycopodiopsida	12	Selaginellales	73	Selaginellaceae	95	Liburnisporis adnacus	166	585	Fern/Moss	2	Camp	1	Payenburg et al., 2002	19	NULL	Milk River/Eagle	32	55.9593	-76.5094	56.0731	-78.717	55.1592	-81.572	47.4346	-109.704	82	2.1	80	temperate lowland forest	2	2. temperate lowland forest	Wolf
	uncertain	23	uncertain	80	uncertain	105	Lusatisporis dettmannae	172	607	Angiosperm	1	Camp	1	Payenburg et al., 2002	19	NULL	Milk River/Eagle	32	55.9593	-76.5094	56.0731	-78.717	55.1592	-81.572	47.4346	-109.704	82	2.1	80	open scrubland	8	8. open scrubland	Wolf
	uncertain	23	uncertain	80	uncertain	105	Mancicorpus calvus	180	633	Angiosperm	1	Camp	1	Payenburg et al., 2002	19	NULL	Milk River/Eagle	32	55.9593	-76.5094	56.0731	-78.717	55.1592	-81.572	47.4346	-109.704	82	2.1	80	coastal plain	4	4. coastal plain	Wolf
	uncertain	23	uncertain	80	uncertain	105	Monosulcites sp.	194	687	Angiosperm	1	Camp	1	Payenburg et al., 2002	19	NULL	Milk River/Eagle	32	55.9593	-76.5094	56.0731	-78.717	55.1592	-81.572	47.4346	-109.704	82	2.1	80	coastal plain	4	4. coastal plain	Wolf
	Magnoliopsida	13	Rosales	63	Rhamnaceae	85	Paliurus triplicatus	219	729	Angiosperm	1	Camp	1	Payenburg et al., 2002	19	NULL	Milk River/Eagle	32	55.9593	-76.5094	56.0731	-78.717	55.1592	-81.572	47.4346	-109.704	82	2.1	80	coastal plain	4	4. coastal plain	Wolf
	Polypodiopsida	18	uncertain	80	uncertain	105	Peromonolites subengelmanii	231	748	Fern/Moss	2	Camp	1	Payenburg et al., 2002	19	NULL	Milk River/Eagle	32	55.9593	-76.5094	56.0731	-78.717	55.1592	-81.572	47.4346	-109.704	82	2.1	80	swampy, lagoonal	3	3. swampy, lagoonal	Wolf
	Polypodiopsida	18	uncertain	80	uncertain	105	Pilosisporites sp.	239	757	Fern/Moss	2	Camp	1	Payenburg et al., 2002	19	NULL	Milk River/Eagle	32	55.9593	-76.5094	56.0731	-78.717	55.1592	-81.572	47.4346	-109.704	82	2.1	80	temperate lowland forest	2	2. temperate lowland forest	Wolf
	Ginkgoopsida?	7	uncertain	80	uncertain	105	Pityosporites constrictus	243	769	Gymnosperm	3	Camp	1	Payenburg et al., 2002	19	NULL	Milk River/Eagle	32	55.9593	-76.5094	56.0731	-78.717	55.1592	-81.572	47.4346	-109.704	82	2.1	80	coastal plain	4	4. coastal plain	Wolf
	Magnoliopsida?	14	Apiales?	4	Apiaceae?	5	Pleurospermaepollenites sp.	244	775	Angiosperm	1	Camp	1	Payenburg et al., 2002	19	NULL	Milk River/Eagle	32	55.9593	-76.5094	56.0731	-78.717	55.1592	-81.572	47.4346	-109.704	82	2.1	80	upland forest	1	1. upland forest	Wolf
	Magnoliopsida	13	Fagales?	29	Juglandaceae?	56	Plicapollis serta	245	776	Angiosperm	1	Camp	1	Payenburg et al., 2002	19	NULL	Milk River/Eagle	32	55.9593	-76.5094	56.0731	-78.717	55.1592	-81.572	47.4346	-109.704	82	2.1	80	coastal plain	4	4. coastal plain	Wolf
	Pinopsida	16	Pinales	54	Podocarpaceae	79	Podocarpidites canadensis	248	781	Gymnosperm	3	Camp	1	Payenburg et al., 2002	19	NULL	Milk River/Eagle	32	55.9593	-76.5094	56.0731	-78.717	55.1592	-81.572	47.4346	-109.704	82	2.1	80	temperate lowland forest	2	2. temperate lowland forest	Wolf
	Bryopsida?	4	uncertain	80	uncertain	105	Polycingulatisporites reduncus	252	805	Fern/Moss	2	Camp	1	Payenburg et al., 2002	19	NULL	Milk River/Eagle	32	55.9593	-76.5094	56.0731	-78.717	55.1592	-81.572	47.4346	-109.704	82	2.1	80	coastal plain	4	4. coastal plain	Wolf
	Pinopsida?	17	uncertain	80	uncertain	105	Pristinuspollenites microsaccus	260	820	Gymnosperm	3	Camp	1	Payenburg et al., 2002	19	NULL	Milk River/Eagle	32	55.9593	-76.5094	56.0731	-78.717	55.1592	-81.572	47.4346	-109.704	82	2.1	80	coastal plain	4	4. coastal plain	Wolf
	Pinopsida?	17	uncertain	80	uncertain	105	Pristinuspollenites sp.	260	821	Gymnosperm	3	Camp	1	Payenburg et al., 2002	19	NULL	Milk River/Eagle	32	55.9593	-76.5094	56.0731	-78.717	55.1592	-81.572	47.4346	-109.704	82	2.1	80	coastal plain	4	4. coastal plain	Wolf
	Magnoliopsida	13	Proteales	61	uncertain	105	Proteacidites thalmanii	262	835	Angiosperm	1	Camp	1	Payenburg et al., 2002	19	NULL	Milk River/Eagle	32	55.9593	-76.5094	56.0731	-78.717	55.1592	-81.572	47.4346	-109.704	82	2.1	80	unknown	0	0. unknown	Wolf
	Magnoliopsida	13	Fagales?	29	Juglandaceae?	56	Pseudoplicapollis newmanii	264	840	Angiosperm	1	Camp	1	Payenburg et al., 2002	19	NULL	Milk River/Eagle	32	55.9593	-76.5094	56.0731	-78.717	55.1592	-81.572	47.4346	-109.704	82	2.1	80	coastal plain	4	4. coastal plain	Wolf
	Liliopsida	10	Poales?	58	Juncaceae?	57	Quadripollis krempii	276	856	Angiosperm	1	Camp	1	Payenburg et al., 2002	19	NULL	Milk River/Eagle	32	55.9593	-76.5094	56.0731	-78.717	55.1592	-81.572	47.4346	-109.704	82	2.1	80	tropical lowland forest	6	6. tropical lowland forest	Wolf
	Polypodiopsida	18	Schizaeales	71	Schizaeaceae	93	Reticulosporis reticulatus	288	878	Fern/Moss	2	Camp	1	Payenburg et al., 2002	19	NULL	Milk River/Eagle	32	55.9593	-76.5094	56.0731	-78.717	55.1592	-81.572	47.4346	-109.704	82	2.1	80	coastal plain	4	4. coastal plain	Wolf
	Lycopodiopsida	12	Lycopodiales	36	Lycopodiaceae	61	Retitriletes sp.	291	897	Fern/Moss	2	Camp	1	Payenburg et al., 2002	19	NULL	Milk River/Eagle	32	55.9593	-76.5094	56.0731	-78.717	55.1592	-81.572	47.4346	-109.704	82	2.1	80	upland forest	1	1. upland forest	Wolf
	Bryopsida	3	uncertain	80	uncertain	105	Rogalskaisporites cicatricosus	293	906	Fern/Moss	2	Camp	1	Payenburg et al., 2002	19	NULL	Milk River/Eagle	32	55.9593	-76.5094	56.0731	-78.717	55.1592	-81.572	47.4346	-109.704	82	2.1	80	temperate lowland forest	2	2. temperate lowland forest	Wolf
	Lycopodiopsida	12	Lycopodiales	36	Lycopodiaceae	61	Sestrosporites pseudoalveolatus	313	951	Fern/Moss	2	Camp	1	Payenburg et al., 2002	19	NULL	Milk River/Eagle	32	55.9593	-76.5094	56.0731	-78.717	55.1592	-81.572	47.4346	-109.704	82	2.1	80	upland forest	1	1. upland forest	Wolf
	Bryopsida	3	uncertain	80	uncertain	105	Stereisporites antiquasporites	329	987	Fern/Moss	2	Camp	1	Payenburg et al., 2002	19	NULL	Milk River/Eagle	32	55.9593	-76.5094	56.0731	-78.717	55.1592	-81.572	47.4346	-109.704	82	2.1	80	coastal plain	4	4. coastal plain	Wolf
	Bryopsida	3	uncertain	80	uncertain	105	Stereisporites regium	329	990	Fern/Moss	2	Camp	1	Payenburg et al., 2002	19	NULL	Milk River/Eagle	32	55.9593	-76.5094	56.0731	-78.717	55.1592	-81.572	47.4346	-109.704	82	2.1	80	coastal plain	4	4. coastal plain	Wolf
	Pinopsida	16	Pinales	54	Cupressaceae?	30	Taxodiaceaepollenites hiatus	343	1015	Gymnosperm	3	Camp	1	Payenburg et al., 2002	19	NULL	Milk River/Eagle	32	55.9593	-76.5094	56.0731	-78.717	55.1592	-81.572	47.4346	-109.704	82	2.1	80	temperate lowland forest	2	2. temperate lowland forest	Wolf
	Pinopsida	16	Pinales	54	Cupressaceae?	30	Taxodiaceaepollenites vacuipites	343	1018	Gymnosperm	3	Camp	1	Payenburg et al., 2002	19	NULL	Milk River/Eagle	32	55.9593	-76.5094	56.0731	-78.717	55.1592	-81.572	47.4346	-109.704	82	2.1	80	temperate lowland forest	2	2. temperate lowland forest	Wolf
	Bryopsida	3	uncertain	80	uncertain	105	Triporoletes singularis	369	1127	Fern/Moss	2	Camp	1	Payenburg et al., 2002	19	NULL	Milk River/Eagle	32	55.9593	-76.5094	56.0731	-78.717	55.1592	-81.572	47.4346	-109.704	82	2.1	80	temperate lowland forest	2	2. temperate lowland forest	Wolf
	Pinopsida	16	uncertain	80	uncertain	105	Uesuguipollenites callosus	379	1159	Gymnosperm	3	Camp	1	Payenburg et al., 2002	19	NULL	Milk River/Eagle	32	55.9593	-76.5094	56.0731	-78.717	55.1592	-81.572	47.4346	-109.704	82	2.1	80	temperate lowland forest	2	2. temperate lowland forest	Wolf
	Polypodiopsida?	19	uncertain	80	uncertain	105	Umbosporites callosus	382	1167	Fern/Moss	2	Camp	1	Payenburg et al., 2002	19	NULL	Milk River/Eagle	32	55.9593	-76.5094	56.0731	-78.717	55.1592	-81.572	47.4346	-109.704	82	2.1	80	coastal plain	4	4. coastal plain	Wolf
	Pteridospermatopsida?	21	Caytoniales?	11	Caytoniaceae?	22	Vitreisporites pallidus	393	1186	Gymnosperm	3	Camp	1	Payenburg et al., 2002	19	NULL	Milk River/Eagle	32	55.9593	-76.5094	56.0731	-78.717	55.1592	-81.572	47.4346	-109.704	82	2.1	80	temperate lowland forest	2	2. temperate lowland forest	Wolf
	Marchantiopsida	15	uncertain	80	uncertain	105	Zlivisporis cenomanianus	397	1199	Fern/Moss	2	Camp	1	Payenburg et al., 2002	19	NULL	Milk River/Eagle	32	55.9593	-76.5094	56.0731	-78.717	55.1592	-81.572	47.4346	-109.704	82	2.1	80	swampy, lagoonal	3	3. swampy, lagoonal	Wolf
	Marchantiopsida	15	uncertain	80	uncertain	105	Zlivisporis sp.	397	1203	Fern/Moss	2	Camp	1	Payenburg et al., 2002	19	NULL	Milk River/Eagle	32	55.9593	-76.5094	56.0731	-78.717	55.1592	-81.572	47.4346	-109.704	82	2.1	80	swampy, lagoonal	3	3. swampy, lagoonal	Wolf
	Magnoliopsida	13	Santalales?	66	uncertain	105	Accuratipollis lactifluminis	5	11	Angiosperm	1	Camp	1	Payenburg et al., 2002	19	NULL	Milk River/Eagle	32	56.1267	-76.5923	56.2399	-78.8044	55.3252	-81.662	47.5785	-109.848	82	2.1	80	swampy, lagoonal	3	3. swampy, lagoonal	Miller
	Pinopsida	16	Pinales?	55	uncertain	105	Alisporites bilateralis	13	29	Gymnosperm	3	Camp	1	Payenburg et al., 2002	19	NULL	Milk River/Eagle	32	56.1267	-76.5923	56.2399	-78.8044	55.3252	-81.662	47.5785	-109.848	82	2.1	80	coastal plain	4	4. coastal plain	Miller
	Anthocerotopsida	1	Notothyladales?	48	Notothyladaceae?	69	Annulispora salsa	19	46	Fern/Moss	2	Camp	1	Payenburg et al., 2002	19	NULL	Milk River/Eagle	32	56.1267	-76.5923	56.2399	-78.8044	55.3252	-81.662	47.5785	-109.848	82	2.1	80	tropical lowland forest	6	6. tropical lowland forest	Miller
	Magnoliopsida	13	Santalales?	66	Santalaceae?	90	Aquilapollenites rigidus	22	128	Angiosperm	1	Camp	1	Payenburg et al., 2002	19	NULL	Milk River/Eagle	32	56.1267	-76.5923	56.2399	-78.8044	55.3252	-81.662	47.5785	-109.848	82	2.1	80	temperate lowland forest	2	2. temperate lowland forest	Miller
	Magnoliopsida	13	Santalales?	66	Santalaceae?	90	Aquilapollenites sp.	22	131	Angiosperm	1	Camp	1	Payenburg et al., 2002	19	NULL	Milk River/Eagle	32	56.1267	-76.5923	56.2399	-78.8044	55.3252	-81.662	47.5785	-109.848	82	2.1	80	temperate lowland forest	2	2. temperate lowland forest	Miller
	Magnoliopsida	13	Santalales?	66	Santalaceae?	90	Aquilapollenites stelckii	22	136	Angiosperm	1	Camp	1	Payenburg et al., 2002	19	NULL	Milk River/Eagle	32	56.1267	-76.5923	56.2399	-78.8044	55.3252	-81.662	47.5785	-109.848	82	2.1	80	temperate lowland forest	2	2. temperate lowland forest	Miller
	Magnoliopsida	13	Santalales?	66	Santalaceae?	90	Aquilapollenites trialatus	22	139	Angiosperm	1	Camp	1	Payenburg et al., 2002	19	NULL	Milk River/Eagle	32	56.1267	-76.5923	56.2399	-78.8044	55.3252	-81.662	47.5785	-109.848	82	2.1	80	temperate lowland forest	2	2. temperate lowland forest	Miller
	Magnoliopsida	13	Santalales?	66	Santalaceae?	90	Aquilapollenites turbidus	22	141	Angiosperm	1	Camp	1	Payenburg et al., 2002	19	NULL	Milk River/Eagle	32	56.1267	-76.5923	56.2399	-78.8044	55.3252	-81.662	47.5785	-109.848	82	2.1	80	temperate lowland forest	2	2. temperate lowland forest	Miller
	uncertain	23	uncertain	80	uncertain	105	Azonia pulchella	29	178	Fern/Moss	2	Camp	1	Payenburg et al., 2002	19	NULL	Milk River/Eagle	32	56.1267	-76.5923	56.2399	-78.8044	55.3252	-81.662	47.5785	-109.848	82	2.1	80	unknown	0	0. unknown	Miller
	uncertain	23	uncertain	80	uncertain	105	Azonia recta	29	179	Fern/Moss	2	Camp	1	Payenburg et al., 2002	19	NULL	Milk River/Eagle	32	56.1267	-76.5923	56.2399	-78.8044	55.3252	-81.662	47.5785	-109.848	82	2.1	80	unknown	0	0. unknown	Miller
	Polypodiopsida	18	uncertain	80	uncertain	105	Baculatisporites comaumensis	30	181	Fern/Moss	2	Camp	1	Payenburg et al., 2002	19	NULL	Milk River/Eagle	32	56.1267	-76.5923	56.2399	-78.8044	55.3252	-81.662	47.5785	-109.848	82	2.1	80	coastal plain	4	4. coastal plain	Miller
	Polypodiopsida	18	Schizaeales	71	Schizaeaceae	93	Biretisporites deltoidus	38	206	Fern/Moss	2	Camp	1	Payenburg et al., 2002	19	NULL	Milk River/Eagle	32	56.1267	-76.5923	56.2399	-78.8044	55.3252	-81.662	47.5785	-109.848	82	2.1	80	temperate lowland forest	2	2. temperate lowland forest	Miller
	Cycadopsida?	6	Cycadales?	19	uncertain	105	Brevimonosulcites corrugatus	40	210	Gymnosperm	3	Camp	1	Payenburg et al., 2002	19	NULL	Milk River/Eagle	32	56.1267	-76.5923	56.2399	-78.8044	55.3252	-81.662	47.5785	-109.848	82	2.1	80	temperate lowland forest	2	2. temperate lowland forest	Miller
	Pinopsida	16	Pinales	54	uncertain	105	Callialasporites dampieri	42	213	Gymnosperm	3	Camp	1	Payenburg et al., 2002	19	NULL	Milk River/Eagle	32	56.1267	-76.5923	56.2399	-78.8044	55.3252	-81.662	47.5785	-109.848	82	2.1	80	upland forest	1	1. upland forest	Miller
	Lycopodiopsida	12	Lycopodiales	36	uncertain	105	Camarozonosporites insignis	44	225	Fern/Moss	2	Camp	1	Payenburg et al., 2002	19	NULL	Milk River/Eagle	32	56.1267	-76.5923	56.2399	-78.8044	55.3252	-81.662	47.5785	-109.848	82	2.1	80	coastal plain	4	4. coastal plain	Miller
	Polypodiopsida	18	Schizaeales	71	Schizaeaceae	93	Cicatricosisporites sp.	58	273	Fern/Moss	2	Camp	1	Payenburg et al., 2002	19	NULL	Milk River/Eagle	32	56.1267	-76.5923	56.2399	-78.8044	55.3252	-81.662	47.5785	-109.848	82	2.1	80	temperate lowland forest	2	2. temperate lowland forest	Miller
	Bryopsida	3	uncertain	80	uncertain	105	Cingutriletes clavus	61	288	Fern/Moss	2	Camp	1	Payenburg et al., 2002	19	NULL	Milk River/Eagle	32	56.1267	-76.5923	56.2399	-78.8044	55.3252	-81.662	47.5785	-109.848	82	2.1	80	coastal plain	4	4. coastal plain	Miller
	Bryopsida	3	uncertain	80	uncertain	105	Cingutriletes simplex	61	289	Fern/Moss	2	Camp	1	Payenburg et al., 2002	19	NULL	Milk River/Eagle	32	56.1267	-76.5923	56.2399	-78.8044	55.3252	-81.662	47.5785	-109.848	82	2.1	80	coastal plain	4	4. coastal plain	Miller
	Polypodiopsida?	19	uncertain	80	uncertain	105	Circumflexipollis tilioides	63	292	Fern/Moss	2	Camp	1	Payenburg et al., 2002	19	NULL	Milk River/Eagle	32	56.1267	-76.5923	56.2399	-78.8044	55.3252	-81.662	47.5785	-109.848	82	2.1	80	open scrubland	8	8. open scrubland	Miller
	Polypodiopsida	18	Cyatheales?	17	Cyatheaceae?	32	Cyathidites australis	82	345	Fern/Moss	2	Camp	1	Payenburg et al., 2002	19	NULL	Milk River/Eagle	32	56.1267	-76.5923	56.2399	-78.8044	55.3252	-81.662	47.5785	-109.848	82	2.1	80	temperate lowland forest	2	2. temperate lowland forest	Miller
	Polypodiopsida	18	Cyatheales?	17	Cyatheaceae?	32	Cyathidites minor	82	349	Fern/Moss	2	Camp	1	Payenburg et al., 2002	19	NULL	Milk River/Eagle	32	56.1267	-76.5923	56.2399	-78.8044	55.3252	-81.662	47.5785	-109.848	82	2.1	80	temperate lowland forest	2	2. temperate lowland forest	Miller
	Cycadopsida	5	Cycadales?	19	uncertain	105	Cycadopites fragilis	84	358	Gymnosperm	3	Camp	1	Payenburg et al., 2002	19	NULL	Milk River/Eagle	32	56.1267	-76.5923	56.2399	-78.8044	55.3252	-81.662	47.5785	-109.848	82	2.1	80	tropical lowland forest	6	6. tropical lowland forest	Miller
	Polypodiopsida	18	Schizaeales	71	Schizaeaceae	93	Distaltriangulisporites mutabilis	91	376	Fern/Moss	2	Camp	1	Payenburg et al., 2002	19	NULL	Milk River/Eagle	32	56.1267	-76.5923	56.2399	-78.8044	55.3252	-81.662	47.5785	-109.848	82	2.1	80	tropical lowland forest	6	6. tropical lowland forest	Miller
	Polypodiopsida	18	Schizaeales	71	Schizaeaceae	93	Distaltriangulisporites perplexus	91	377	Fern/Moss	2	Camp	1	Payenburg et al., 2002	19	NULL	Milk River/Eagle	32	56.1267	-76.5923	56.2399	-78.8044	55.3252	-81.662	47.5785	-109.848	82	2.1	80	tropical lowland forest	6	6. tropical lowland forest	Miller
	Pinopsida	16	Voltziales	78	uncertain	105	Enzonalasporites bojatus	103	398	Gymnosperm	3	Camp	1	Payenburg et al., 2002	19	NULL	Milk River/Eagle	32	56.1267	-76.5923	56.2399	-78.8044	55.3252	-81.662	47.5785	-109.848	82	2.1	80	tropical lowland forest	6	6. tropical lowland forest	Miller
	Magnoliopsida	13	Buxales	8	Buxaceae	20	Erdtmanipollis circulifer	107	420	Angiosperm	1	Camp	1	Payenburg et al., 2002	19	NULL	Milk River/Eagle	32	56.1267	-76.5923	56.2399	-78.8044	55.3252	-81.662	47.5785	-109.848	82	2.1	80	temperate lowland forest	2	2. temperate lowland forest	Miller
	Cycadopsida	5	Cycadales	18	uncertain	105	Eucommiidites troedssonii	110	434	Gymnosperm	3	Camp	1	Payenburg et al., 2002	19	NULL	Milk River/Eagle	32	56.1267	-76.5923	56.2399	-78.8044	55.3252	-81.662	47.5785	-109.848	82	2.1	80	coastal plain	4	4. coastal plain	Miller
	Magnoliopsida	13	Santalales?	66	Santalaceae?	90	Fibulapollis scabratus	115	440	Angiosperm	1	Camp	1	Payenburg et al., 2002	19	NULL	Milk River/Eagle	32	56.1267	-76.5923	56.2399	-78.8044	55.3252	-81.662	47.5785	-109.848	82	2.1	80	coastal plain	4	4. coastal plain	Miller
	Bryopsida?	4	uncertain	80	uncertain	105	Foraminisporis asymmetricus	116	441	Fern/Moss	2	Camp	1	Payenburg et al., 2002	19	NULL	Milk River/Eagle	32	56.1267	-76.5923	56.2399	-78.8044	55.3252	-81.662	47.5785	-109.848	82	2.1	80	coastal plain	4	4. coastal plain	Miller
	Bryopsida?	4	uncertain	80	uncertain	105	Foraminisporis sp.	116	443	Fern/Moss	2	Camp	1	Payenburg et al., 2002	19	NULL	Milk River/Eagle	32	56.1267	-76.5923	56.2399	-78.8044	55.3252	-81.662	47.5785	-109.848	82	2.1	80	coastal plain	4	4. coastal plain	Miller
	Bryopsida?	4	uncertain	80	uncertain	105	Foraminisporis wonthaggiensis	116	445	Fern/Moss	2	Camp	1	Payenburg et al., 2002	19	NULL	Milk River/Eagle	32	56.1267	-76.5923	56.2399	-78.8044	55.3252	-81.662	47.5785	-109.848	82	2.1	80	coastal plain	4	4. coastal plain	Miller
	Magnoliopsida	13	uncertain	80	uncertain	105	Fraxinoipollenites constrictus	122	463	Angiosperm	1	Camp	1	Payenburg et al., 2002	19	NULL	Milk River/Eagle	32	56.1267	-76.5923	56.2399	-78.8044	55.3252	-81.662	47.5785	-109.848	82	2.1	80	estuarine, aquatic	7	7. estuarine, aquatic	Miller
	uncertain	23	uncertain	80	uncertain	105	Gabonisporis labyrinthus	123	467	Fern/Moss	2	Camp	1	Payenburg et al., 2002	19	NULL	Milk River/Eagle	32	56.1267	-76.5923	56.2399	-78.8044	55.3252	-81.662	47.5785	-109.848	82	2.1	80	wet, successional	5	5. wet, successional	Miller
	Polypodiopsida	18	Gleicheniales	30	Gleicheniaceae	49	Gleicheniidites delicatus	128	481	Fern/Moss	2	Camp	1	Payenburg et al., 2002	19	NULL	Milk River/Eagle	32	56.1267	-76.5923	56.2399	-78.8044	55.3252	-81.662	47.5785	-109.848	82	2.1	80	swampy, lagoonal	3	3. swampy, lagoonal	Miller
	Polypodiopsida	18	Gleicheniales	30	Gleicheniaceae	49	Gleicheniidites senonicus	128	482	Fern/Moss	2	Camp	1	Payenburg et al., 2002	19	NULL	Milk River/Eagle	32	56.1267	-76.5923	56.2399	-78.8044	55.3252	-81.662	47.5785	-109.848	82	2.1	80	swampy, lagoonal	3	3. swampy, lagoonal	Miller
	Polypodiopsida?	19	uncertain	80	uncertain	105	Hazaria canadiana	138	504	Fern/Moss	2	Camp	1	Payenburg et al., 2002	19	NULL	Milk River/Eagle	32	56.1267	-76.5923	56.2399	-78.8044	55.3252	-81.662	47.5785	-109.848	82	2.1	80	unknown	0	0. unknown	Miller
	Polypodiopsida?	19	uncertain	80	uncertain	105	Hazaria sheopiarii	138	506	Fern/Moss	2	Camp	1	Payenburg et al., 2002	19	NULL	Milk River/Eagle	32	56.1267	-76.5923	56.2399	-78.8044	55.3252	-81.662	47.5785	-109.848	82	2.1	80	unknown	0	0. unknown	Miller
	Polypodiopsida?	19	uncertain	80	uncertain	105	Hedlundisporites tricrassus	139	507	Fern/Moss	2	Camp	1	Payenburg et al., 2002	19	NULL	Milk River/Eagle	32	56.1267	-76.5923	56.2399	-78.8044	55.3252	-81.662	47.5785	-109.848	82	2.1	80	open scrubland	8	8. open scrubland	Miller
	Lycopodiopsida	12	Selaginellales	73	Selaginellaceae	95	Heliosporites kemensis	140	508	Fern/Moss	2	Camp	1	Payenburg et al., 2002	19	NULL	Milk River/Eagle	32	56.1267	-76.5923	56.2399	-78.8044	55.3252	-81.662	47.5785	-109.848	82	2.1	80	temperate lowland forest	2	2. temperate lowland forest	Miller
	uncertain	23	uncertain	80	uncertain	105	Integricorpus clarireticulatus	149	531	Angiosperm	1	Camp	1	Payenburg et al., 2002	19	NULL	Milk River/Eagle	32	56.1267	-76.5923	56.2399	-78.8044	55.3252	-81.662	47.5785	-109.848	82	2.1	80	coastal plain	4	4. coastal plain	Miller
	Bryopsida?	4	uncertain	80	uncertain	105	Interulobites sp.	151	534	Fern/Moss	2	Camp	1	Payenburg et al., 2002	19	NULL	Milk River/Eagle	32	56.1267	-76.5923	56.2399	-78.8044	55.3252	-81.662	47.5785	-109.848	82	2.1	80	coastal plain	4	4. coastal plain	Miller
	Polypodiopsida	18	Schizaeales	71	Schizaeaceae	93	Klukisporites foveolatus	155	544	Fern/Moss	2	Camp	1	Payenburg et al., 2002	19	NULL	Milk River/Eagle	32	56.1267	-76.5923	56.2399	-78.8044	55.3252	-81.662	47.5785	-109.848	82	2.1	80	tropical lowland forest	6	6. tropical lowland forest	Miller
	Polypodiopsida	18	Cyatheales	16	Cyatheaceae	31	Kuylisporites scutatus	157	555	Fern/Moss	2	Camp	1	Payenburg et al., 2002	19	NULL	Milk River/Eagle	32	56.1267	-76.5923	56.2399	-78.8044	55.3252	-81.662	47.5785	-109.848	82	2.1	80	tropical lowland forest	6	6. tropical lowland forest	Miller
	Polypodiopsida	18	uncertain	80	uncertain	105	Laevigatosporites haardti	158	565	Fern/Moss	2	Camp	1	Payenburg et al., 2002	19	NULL	Milk River/Eagle	32	56.1267	-76.5923	56.2399	-78.8044	55.3252	-81.662	47.5785	-109.848	82	2.1	80	coastal plain	4	4. coastal plain	Miller
	Liliopsida	10	Liliales	34	uncertain	105	Liliacidites sp.	168	598	Angiosperm	1	Camp	1	Payenburg et al., 2002	19	NULL	Milk River/Eagle	32	56.1267	-76.5923	56.2399	-78.8044	55.3252	-81.662	47.5785	-109.848	82	2.1	80	temperate lowland forest	2	2. temperate lowland forest	Miller
	Polypodiopsida	18	Cyatheales?	17	uncertain	105	Maculatisporites sp.	179	628	Fern/Moss	2	Camp	1	Payenburg et al., 2002	19	NULL	Milk River/Eagle	32	56.1267	-76.5923	56.2399	-78.8044	55.3252	-81.662	47.5785	-109.848	82	2.1	80	tropical lowland forest	6	6. tropical lowland forest	Miller
	uncertain	23	uncertain	80	uncertain	105	Mancicorpus calvus	180	633	Angiosperm	1	Camp	1	Payenburg et al., 2002	19	NULL	Milk River/Eagle	32	56.1267	-76.5923	56.2399	-78.8044	55.3252	-81.662	47.5785	-109.848	82	2.1	80	coastal plain	4	4. coastal plain	Miller
	uncertain	23	uncertain	80	uncertain	105	Mancicorpus sp.	180	639	Angiosperm	1	Camp	1	Payenburg et al., 2002	19	NULL	Milk River/Eagle	32	56.1267	-76.5923	56.2399	-78.8044	55.3252	-81.662	47.5785	-109.848	82	2.1	80	coastal plain	4	4. coastal plain	Miller
	uncertain	23	uncertain	80	uncertain	105	Monosulcites sp.	194	687	Angiosperm	1	Camp	1	Payenburg et al., 2002	19	NULL	Milk River/Eagle	32	56.1267	-76.5923	56.2399	-78.8044	55.3252	-81.662	47.5785	-109.848	82	2.1	80	coastal plain	4	4. coastal plain	Miller
	Magnoliopsida	13	Rosales	63	Rhamnaceae	85	Paliurus triplicatus	219	729	Angiosperm	1	Camp	1	Payenburg et al., 2002	19	NULL	Milk River/Eagle	32	56.1267	-76.5923	56.2399	-78.8044	55.3252	-81.662	47.5785	-109.848	82	2.1	80	coastal plain	4	4. coastal plain	Miller
	uncertain	23	uncertain	80	uncertain	105	Penetetrapites inconspicuus	226	740	Angiosperm	1	Camp	1	Payenburg et al., 2002	19	NULL	Milk River/Eagle	32	56.1267	-76.5923	56.2399	-78.8044	55.3252	-81.662	47.5785	-109.848	82	2.1	80	coastal plain	4	4. coastal plain	Miller
	Polypodiopsida	18	uncertain	80	uncertain	105	Peromonolites subengelmanii	231	748	Fern/Moss	2	Camp	1	Payenburg et al., 2002	19	NULL	Milk River/Eagle	32	56.1267	-76.5923	56.2399	-78.8044	55.3252	-81.662	47.5785	-109.848	82	2.1	80	swampy, lagoonal	3	3. swampy, lagoonal	Miller
	Polypodiopsida	18	uncertain	80	uncertain	105	Pilosisporites sp.	239	757	Fern/Moss	2	Camp	1	Payenburg et al., 2002	19	NULL	Milk River/Eagle	32	56.1267	-76.5923	56.2399	-78.8044	55.3252	-81.662	47.5785	-109.848	82	2.1	80	temperate lowland forest	2	2. temperate lowland forest	Miller
	Ginkgoopsida?	7	uncertain	80	uncertain	105	Pityosporites constrictus	243	769	Gymnosperm	3	Camp	1	Payenburg et al., 2002	19	NULL	Milk River/Eagle	32	56.1267	-76.5923	56.2399	-78.8044	55.3252	-81.662	47.5785	-109.848	82	2.1	80	coastal plain	4	4. coastal plain	Miller
	Magnoliopsida?	14	Apiales?	4	Apiaceae?	5	Pleurospermaepollenites sp.	244	775	Angiosperm	1	Camp	1	Payenburg et al., 2002	19	NULL	Milk River/Eagle	32	56.1267	-76.5923	56.2399	-78.8044	55.3252	-81.662	47.5785	-109.848	82	2.1	80	upland forest	1	1. upland forest	Miller
	Magnoliopsida	13	Fagales?	29	Juglandaceae?	56	Plicapollis serta	245	776	Angiosperm	1	Camp	1	Payenburg et al., 2002	19	NULL	Milk River/Eagle	32	56.1267	-76.5923	56.2399	-78.8044	55.3252	-81.662	47.5785	-109.848	82	2.1	80	coastal plain	4	4. coastal plain	Miller
	Bryopsida?	4	uncertain	80	uncertain	105	Polycingulatisporites reduncus	252	805	Fern/Moss	2	Camp	1	Payenburg et al., 2002	19	NULL	Milk River/Eagle	32	56.1267	-76.5923	56.2399	-78.8044	55.3252	-81.662	47.5785	-109.848	82	2.1	80	coastal plain	4	4. coastal plain	Miller
	Pinopsida?	17	uncertain	80	uncertain	105	Pristinuspollenites microsaccus	260	820	Gymnosperm	3	Camp	1	Payenburg et al., 2002	19	NULL	Milk River/Eagle	32	56.1267	-76.5923	56.2399	-78.8044	55.3252	-81.662	47.5785	-109.848	82	2.1	80	coastal plain	4	4. coastal plain	Miller
	Pinopsida?	17	uncertain	80	uncertain	105	Pristinuspollenites sp.	260	821	Gymnosperm	3	Camp	1	Payenburg et al., 2002	19	NULL	Milk River/Eagle	32	56.1267	-76.5923	56.2399	-78.8044	55.3252	-81.662	47.5785	-109.848	82	2.1	80	coastal plain	4	4. coastal plain	Miller
	Magnoliopsida	13	Proteales	61	uncertain	105	Proteacidites retusus	262	831	Angiosperm	1	Camp	1	Payenburg et al., 2002	19	NULL	Milk River/Eagle	32	56.1267	-76.5923	56.2399	-78.8044	55.3252	-81.662	47.5785	-109.848	82	2.1	80	unknown	0	0. unknown	Miller
	Magnoliopsida	13	Proteales	61	uncertain	105	Proteacidites thalmanii	262	835	Angiosperm	1	Camp	1	Payenburg et al., 2002	19	NULL	Milk River/Eagle	32	56.1267	-76.5923	56.2399	-78.8044	55.3252	-81.662	47.5785	-109.848	82	2.1	80	unknown	0	0. unknown	Miller
	Magnoliopsida	13	Fagales?	29	Juglandaceae?	56	Pseudoplicapollis newmanii	264	840	Angiosperm	1	Camp	1	Payenburg et al., 2002	19	NULL	Milk River/Eagle	32	56.1267	-76.5923	56.2399	-78.8044	55.3252	-81.662	47.5785	-109.848	82	2.1	80	coastal plain	4	4. coastal plain	Miller
	Liliopsida	10	Poales?	58	Juncaceae?	57	Quadripollis krempii	276	856	Angiosperm	1	Camp	1	Payenburg et al., 2002	19	NULL	Milk River/Eagle	32	56.1267	-76.5923	56.2399	-78.8044	55.3252	-81.662	47.5785	-109.848	82	2.1	80	tropical lowland forest	6	6. tropical lowland forest	Miller
	Polypodiopsida	18	Schizaeales	71	Schizaeaceae	93	Reticulosporis reticulatus	288	878	Fern/Moss	2	Camp	1	Payenburg et al., 2002	19	NULL	Milk River/Eagle	32	56.1267	-76.5923	56.2399	-78.8044	55.3252	-81.662	47.5785	-109.848	82	2.1	80	coastal plain	4	4. coastal plain	Miller
	Lycopodiopsida	12	Lycopodiales	36	Lycopodiaceae	61	Retitriletes sp.	291	897	Fern/Moss	2	Camp	1	Payenburg et al., 2002	19	NULL	Milk River/Eagle	32	56.1267	-76.5923	56.2399	-78.8044	55.3252	-81.662	47.5785	-109.848	82	2.1	80	upland forest	1	1. upland forest	Miller
	Pinopsida	16	uncertain	80	uncertain	105	Rugubivesiculites reductus	297	914	Gymnosperm	3	Camp	1	Payenburg et al., 2002	19	NULL	Milk River/Eagle	32	56.1267	-76.5923	56.2399	-78.8044	55.3252	-81.662	47.5785	-109.848	82	2.1	80	coastal plain	4	4. coastal plain	Miller
	Pinopsida	16	Pinales	54	Cupressaceae	29	Sequoiapollenites paleocenicus	312	946	Gymnosperm	3	Camp	1	Payenburg et al., 2002	19	NULL	Milk River/Eagle	32	56.1267	-76.5923	56.2399	-78.8044	55.3252	-81.662	47.5785	-109.848	82	2.1	80	temperate lowland forest	2	2. temperate lowland forest	Miller
	Lycopodiopsida	12	Lycopodiales	36	Lycopodiaceae	61	Sestrosporites pseudoalveolatus	313	951	Fern/Moss	2	Camp	1	Payenburg et al., 2002	19	NULL	Milk River/Eagle	32	56.1267	-76.5923	56.2399	-78.8044	55.3252	-81.662	47.5785	-109.848	82	2.1	80	upland forest	1	1. upland forest	Miller
	uncertain	23	uncertain	80	uncertain	105	Siberiapollis sp.	314	953	Angiosperm	1	Camp	1	Payenburg et al., 2002	19	NULL	Milk River/Eagle	32	56.1267	-76.5923	56.2399	-78.8044	55.3252	-81.662	47.5785	-109.848	82	2.1	80	coastal plain	4	4. coastal plain	Miller
	Bryopsida	3	uncertain	80	uncertain	105	Stereisporites antiquasporites	329	987	Fern/Moss	2	Camp	1	Payenburg et al., 2002	19	NULL	Milk River/Eagle	32	56.1267	-76.5923	56.2399	-78.8044	55.3252	-81.662	47.5785	-109.848	82	2.1	80	coastal plain	4	4. coastal plain	Miller
	Bryopsida	3	uncertain	80	uncertain	105	Stereisporites regium	329	990	Fern/Moss	2	Camp	1	Payenburg et al., 2002	19	NULL	Milk River/Eagle	32	56.1267	-76.5923	56.2399	-78.8044	55.3252	-81.662	47.5785	-109.848	82	2.1	80	coastal plain	4	4. coastal plain	Miller
	Pinopsida	16	Pinales	54	Cupressaceae?	30	Taxodiaceaepollenites hiatus	343	1015	Gymnosperm	3	Camp	1	Payenburg et al., 2002	19	NULL	Milk River/Eagle	32	56.1267	-76.5923	56.2399	-78.8044	55.3252	-81.662	47.5785	-109.848	82	2.1	80	temperate lowland forest	2	2. temperate lowland forest	Miller
	Pinopsida	16	Pinales	54	Cupressaceae?	30	Taxodiaceaepollenites vacuipites	343	1018	Gymnosperm	3	Camp	1	Payenburg et al., 2002	19	NULL	Milk River/Eagle	32	56.1267	-76.5923	56.2399	-78.8044	55.3252	-81.662	47.5785	-109.848	82	2.1	80	temperate lowland forest	2	2. temperate lowland forest	Miller
	Bryopsida	3	uncertain	80	uncertain	105	Triporoletes involucratus	369	1125	Fern/Moss	2	Camp	1	Payenburg et al., 2002	19	NULL	Milk River/Eagle	32	56.1267	-76.5923	56.2399	-78.8044	55.3252	-81.662	47.5785	-109.848	82	2.1	80	temperate lowland forest	2	2. temperate lowland forest	Miller
	Polypodiopsida?	19	uncertain	80	uncertain	105	Umbosporites callosus	382	1167	Fern/Moss	2	Camp	1	Payenburg et al., 2002	19	NULL	Milk River/Eagle	32	56.1267	-76.5923	56.2399	-78.8044	55.3252	-81.662	47.5785	-109.848	82	2.1	80	coastal plain	4	4. coastal plain	Miller
	Pteridospermatopsida?	21	Caytoniales?	11	Caytoniaceae?	22	Vitreisporites pallidus	393	1186	Gymnosperm	3	Camp	1	Payenburg et al., 2002	19	NULL	Milk River/Eagle	32	56.1267	-76.5923	56.2399	-78.8044	55.3252	-81.662	47.5785	-109.848	82	2.1	80	temperate lowland forest	2	2. temperate lowland forest	Miller
	Marchantiopsida	15	uncertain	80	uncertain	105	Zlivisporis cenomanianus	397	1199	Fern/Moss	2	Camp	1	Payenburg et al., 2002	19	NULL	Milk River/Eagle	32	56.1267	-76.5923	56.2399	-78.8044	55.3252	-81.662	47.5785	-109.848	82	2.1	80	swampy, lagoonal	3	3. swampy, lagoonal	Miller
	Marchantiopsida	15	uncertain	80	uncertain	105	Zlivisporis reticulatus	397	1201	Fern/Moss	2	Camp	1	Payenburg et al., 2002	19	NULL	Milk River/Eagle	32	56.1267	-76.5923	56.2399	-78.8044	55.3252	-81.662	47.5785	-109.848	82	2.1	80	swampy, lagoonal	3	3. swampy, lagoonal	Miller
	Magnoliopsida	13	Santalales?	66	uncertain	105	Accuratipollis lactifluminis	5	11	Angiosperm	1	Camp	1	Payenburg et al., 2002	19	NULL	Milk River/Eagle	32	56.4919	-76.6151	56.6049	-78.8366	55.6898	-81.7036	47.9202	-110.041	82	2.1	80	swampy, lagoonal	3	3. swampy, lagoonal	Eagle
	Marchantiopsida	15	Sphaerocarpales	75	uncertain	105	Aequitriradites spinulosus	9	21	Fern/Moss	2	Camp	1	Payenburg et al., 2002	19	NULL	Milk River/Eagle	32	56.4919	-76.6151	56.6049	-78.8366	55.6898	-81.7036	47.9202	-110.041	82	2.1	80	coastal plain	4	4. coastal plain	Eagle
	Pinopsida	16	Pinales?	55	uncertain	105	Alisporites bilateralis	13	29	Gymnosperm	3	Camp	1	Payenburg et al., 2002	19	NULL	Milk River/Eagle	32	56.4919	-76.6151	56.6049	-78.8366	55.6898	-81.7036	47.9202	-110.041	82	2.1	80	coastal plain	4	4. coastal plain	Eagle
	Pinopsida	16	Pinales?	55	uncertain	105	Alisporites grandis	13	30	Gymnosperm	3	Camp	1	Payenburg et al., 2002	19	NULL	Milk River/Eagle	32	56.4919	-76.6151	56.6049	-78.8366	55.6898	-81.7036	47.9202	-110.041	82	2.1	80	coastal plain	4	4. coastal plain	Eagle
	Anthocerotopsida	1	Notothyladales?	48	Notothyladaceae?	69	Annulispora salsa	19	46	Fern/Moss	2	Camp	1	Payenburg et al., 2002	19	NULL	Milk River/Eagle	32	56.4919	-76.6151	56.6049	-78.8366	55.6898	-81.7036	47.9202	-110.041	82	2.1	80	tropical lowland forest	6	6. tropical lowland forest	Eagle
	Polypodiopsida	18	Schizaeales	71	uncertain	105	Appendicisporites auritus	21	48	Fern/Moss	2	Camp	1	Payenburg et al., 2002	19	NULL	Milk River/Eagle	32	56.4919	-76.6151	56.6049	-78.8366	55.6898	-81.7036	47.9202	-110.041	82	2.1	80	temperate lowland forest	2	2. temperate lowland forest	Eagle
	Polypodiopsida	18	Schizaeales	71	uncertain	105	Appendicisporites undosus	21	58	Fern/Moss	2	Camp	1	Payenburg et al., 2002	19	NULL	Milk River/Eagle	32	56.4919	-76.6151	56.6049	-78.8366	55.6898	-81.7036	47.9202	-110.041	82	2.1	80	temperate lowland forest	2	2. temperate lowland forest	Eagle
	Magnoliopsida	13	Santalales?	66	Santalaceae?	90	Aquilapollenites attenuatus	22	69	Angiosperm	1	Camp	1	Payenburg et al., 2002	19	NULL	Milk River/Eagle	32	56.4919	-76.6151	56.6049	-78.8366	55.6898	-81.7036	47.9202	-110.041	82	2.1	80	temperate lowland forest	2	2. temperate lowland forest	Eagle
	Magnoliopsida	13	Santalales?	66	Santalaceae?	90	Aquilapollenites cf. eurypteronus	22	81	Angiosperm	1	Camp	1	Payenburg et al., 2002	19	NULL	Milk River/Eagle	32	56.4919	-76.6151	56.6049	-78.8366	55.6898	-81.7036	47.9202	-110.041	82	2.1	80	temperate lowland forest	2	2. temperate lowland forest	Eagle
	Magnoliopsida	13	Santalales?	66	Santalaceae?	90	Aquilapollenites funkhouseri	22	97	Angiosperm	1	Camp	1	Payenburg et al., 2002	19	NULL	Milk River/Eagle	32	56.4919	-76.6151	56.6049	-78.8366	55.6898	-81.7036	47.9202	-110.041	82	2.1	80	temperate lowland forest	2	2. temperate lowland forest	Eagle
	Magnoliopsida	13	Santalales?	66	Santalaceae?	90	Aquilapollenites rigidus	22	128	Angiosperm	1	Camp	1	Payenburg et al., 2002	19	NULL	Milk River/Eagle	32	56.4919	-76.6151	56.6049	-78.8366	55.6898	-81.7036	47.9202	-110.041	82	2.1	80	temperate lowland forest	2	2. temperate lowland forest	Eagle
	Magnoliopsida	13	Santalales?	66	Santalaceae?	90	Aquilapollenites sp.	22	131	Angiosperm	1	Camp	1	Payenburg et al., 2002	19	NULL	Milk River/Eagle	32	56.4919	-76.6151	56.6049	-78.8366	55.6898	-81.7036	47.9202	-110.041	82	2.1	80	temperate lowland forest	2	2. temperate lowland forest	Eagle
	Magnoliopsida	13	Santalales?	66	Santalaceae?	90	Aquilapollenites spp.	22	135	Angiosperm	1	Camp	1	Payenburg et al., 2002	19	NULL	Milk River/Eagle	32	56.4919	-76.6151	56.6049	-78.8366	55.6898	-81.7036	47.9202	-110.041	82	2.1	80	temperate lowland forest	2	2. temperate lowland forest	Eagle
	Magnoliopsida	13	Santalales?	66	Santalaceae?	90	Aquilapollenites stelckii	22	136	Angiosperm	1	Camp	1	Payenburg et al., 2002	19	NULL	Milk River/Eagle	32	56.4919	-76.6151	56.6049	-78.8366	55.6898	-81.7036	47.9202	-110.041	82	2.1	80	temperate lowland forest	2	2. temperate lowland forest	Eagle
	Magnoliopsida	13	Santalales?	66	Santalaceae?	90	Aquilapollenites trialatus	22	139	Angiosperm	1	Camp	1	Payenburg et al., 2002	19	NULL	Milk River/Eagle	32	56.4919	-76.6151	56.6049	-78.8366	55.6898	-81.7036	47.9202	-110.041	82	2.1	80	temperate lowland forest	2	2. temperate lowland forest	Eagle
	Polypodiopsida	18	uncertain	80	uncertain	105	Baculatisporites comaumensis	30	181	Fern/Moss	2	Camp	1	Payenburg et al., 2002	19	NULL	Milk River/Eagle	32	56.4919	-76.6151	56.6049	-78.8366	55.6898	-81.7036	47.9202	-110.041	82	2.1	80	coastal plain	4	4. coastal plain	Eagle
	Polypodiopsida	18	Schizaeales	71	Schizaeaceae	93	Biretisporites deltoidus	38	206	Fern/Moss	2	Camp	1	Payenburg et al., 2002	19	NULL	Milk River/Eagle	32	56.4919	-76.6151	56.6049	-78.8366	55.6898	-81.7036	47.9202	-110.041	82	2.1	80	temperate lowland forest	2	2. temperate lowland forest	Eagle
	Cycadopsida?	6	Cycadales?	19	uncertain	105	Brevimonosulcites corrugatus	40	210	Gymnosperm	3	Camp	1	Payenburg et al., 2002	19	NULL	Milk River/Eagle	32	56.4919	-76.6151	56.6049	-78.8366	55.6898	-81.7036	47.9202	-110.041	82	2.1	80	temperate lowland forest	2	2. temperate lowland forest	Eagle
	Pinopsida	16	Pinales	54	uncertain	105	Callialasporites dampieri	42	213	Gymnosperm	3	Camp	1	Payenburg et al., 2002	19	NULL	Milk River/Eagle	32	56.4919	-76.6151	56.6049	-78.8366	55.6898	-81.7036	47.9202	-110.041	82	2.1	80	upland forest	1	1. upland forest	Eagle
	Lycopodiopsida	12	Lycopodiales	36	uncertain	105	Camarozonosporites amplus	44	220	Fern/Moss	2	Camp	1	Payenburg et al., 2002	19	NULL	Milk River/Eagle	32	56.4919	-76.6151	56.6049	-78.8366	55.6898	-81.7036	47.9202	-110.041	82	2.1	80	coastal plain	4	4. coastal plain	Eagle
	Lycopodiopsida	12	Lycopodiales	36	uncertain	105	Camarozonosporites insignis	44	225	Fern/Moss	2	Camp	1	Payenburg et al., 2002	19	NULL	Milk River/Eagle	32	56.4919	-76.6151	56.6049	-78.8366	55.6898	-81.7036	47.9202	-110.041	82	2.1	80	coastal plain	4	4. coastal plain	Eagle
	Lycopodiopsida	12	Lycopodiales	36	uncertain	105	Camarozonosporites sp.	44	226	Fern/Moss	2	Camp	1	Payenburg et al., 2002	19	NULL	Milk River/Eagle	32	56.4919	-76.6151	56.6049	-78.8366	55.6898	-81.7036	47.9202	-110.041	82	2.1	80	coastal plain	4	4. coastal plain	Eagle
	Polypodiopsida	18	Schizaeales	71	Schizaeaceae	93	Cicatricosisporites intersectus	58	266	Fern/Moss	2	Camp	1	Payenburg et al., 2002	19	NULL	Milk River/Eagle	32	56.4919	-76.6151	56.6049	-78.8366	55.6898	-81.7036	47.9202	-110.041	82	2.1	80	temperate lowland forest	2	2. temperate lowland forest	Eagle
	Polypodiopsida	18	Schizaeales	71	Schizaeaceae	93	Cicatricosisporites sp.	58	273	Fern/Moss	2	Camp	1	Payenburg et al., 2002	19	NULL	Milk River/Eagle	32	56.4919	-76.6151	56.6049	-78.8366	55.6898	-81.7036	47.9202	-110.041	82	2.1	80	temperate lowland forest	2	2. temperate lowland forest	Eagle
	Bryopsida	3	uncertain	80	uncertain	105	Cingutriletes clavus	61	288	Fern/Moss	2	Camp	1	Payenburg et al., 2002	19	NULL	Milk River/Eagle	32	56.4919	-76.6151	56.6049	-78.8366	55.6898	-81.7036	47.9202	-110.041	82	2.1	80	coastal plain	4	4. coastal plain	Eagle
	Bryopsida	3	uncertain	80	uncertain	105	Cingutriletes simplex	61	289	Fern/Moss	2	Camp	1	Payenburg et al., 2002	19	NULL	Milk River/Eagle	32	56.4919	-76.6151	56.6049	-78.8366	55.6898	-81.7036	47.9202	-110.041	82	2.1	80	coastal plain	4	4. coastal plain	Eagle
	Polypodiopsida?	19	uncertain	80	uncertain	105	Circumflexipollis tilioides	63	292	Fern/Moss	2	Camp	1	Payenburg et al., 2002	19	NULL	Milk River/Eagle	32	56.4919	-76.6151	56.6049	-78.8366	55.6898	-81.7036	47.9202	-110.041	82	2.1	80	open scrubland	8	8. open scrubland	Eagle
	Polypodiopsida	18	Cyatheales?	17	Cyatheaceae?	32	Cyathidites australis	82	345	Fern/Moss	2	Camp	1	Payenburg et al., 2002	19	NULL	Milk River/Eagle	32	56.4919	-76.6151	56.6049	-78.8366	55.6898	-81.7036	47.9202	-110.041	82	2.1	80	temperate lowland forest	2	2. temperate lowland forest	Eagle
	Polypodiopsida	18	Cyatheales?	17	Cyatheaceae?	32	Cyathidites minor	82	349	Fern/Moss	2	Camp	1	Payenburg et al., 2002	19	NULL	Milk River/Eagle	32	56.4919	-76.6151	56.6049	-78.8366	55.6898	-81.7036	47.9202	-110.041	82	2.1	80	temperate lowland forest	2	2. temperate lowland forest	Eagle
	Cycadopsida	5	Cycadales?	19	uncertain	105	Cycadopites fragilis	84	358	Gymnosperm	3	Camp	1	Payenburg et al., 2002	19	NULL	Milk River/Eagle	32	56.4919	-76.6151	56.6049	-78.8366	55.6898	-81.7036	47.9202	-110.041	82	2.1	80	tropical lowland forest	6	6. tropical lowland forest	Eagle
	Polypodiopsida	18	Schizaeales	71	Schizaeaceae	93	Distaltriangulisporites irregularis	91	375	Fern/Moss	2	Camp	1	Payenburg et al., 2002	19	NULL	Milk River/Eagle	32	56.4919	-76.6151	56.6049	-78.8366	55.6898	-81.7036	47.9202	-110.041	82	2.1	80	tropical lowland forest	6	6. tropical lowland forest	Eagle
	Lycopodiopsida	12	Selaginellales?	74	Selaginellaceae?	96	Echinatisporis sp.	97	387	Fern/Moss	2	Camp	1	Payenburg et al., 2002	19	NULL	Milk River/Eagle	32	56.4919	-76.6151	56.6049	-78.8366	55.6898	-81.7036	47.9202	-110.041	82	2.1	80	estuarine, aquatic	7	7. estuarine, aquatic	Eagle
	Pinopsida	16	Voltziales	78	uncertain	105	Enzonalasporites bojatus	103	398	Gymnosperm	3	Camp	1	Payenburg et al., 2002	19	NULL	Milk River/Eagle	32	56.4919	-76.6151	56.6049	-78.8366	55.6898	-81.7036	47.9202	-110.041	82	2.1	80	tropical lowland forest	6	6. tropical lowland forest	Eagle
	Cycadopsida	5	Cycadales	18	uncertain	105	Eucommiidites troedssonii	110	434	Gymnosperm	3	Camp	1	Payenburg et al., 2002	19	NULL	Milk River/Eagle	32	56.4919	-76.6151	56.6049	-78.8366	55.6898	-81.7036	47.9202	-110.041	82	2.1	80	coastal plain	4	4. coastal plain	Eagle
	Magnoliopsida	13	Santalales?	66	Santalaceae?	90	Fibulapollis scabratus	115	440	Angiosperm	1	Camp	1	Payenburg et al., 2002	19	NULL	Milk River/Eagle	32	56.4919	-76.6151	56.6049	-78.8366	55.6898	-81.7036	47.9202	-110.041	82	2.1	80	coastal plain	4	4. coastal plain	Eagle
	Bryopsida?	4	uncertain	80	uncertain	105	Foraminisporis asymmetricus	116	441	Fern/Moss	2	Camp	1	Payenburg et al., 2002	19	NULL	Milk River/Eagle	32	56.4919	-76.6151	56.6049	-78.8366	55.6898	-81.7036	47.9202	-110.041	82	2.1	80	coastal plain	4	4. coastal plain	Eagle
	Bryopsida?	4	uncertain	80	uncertain	105	Foraminisporis semiscalaris	116	442	Fern/Moss	2	Camp	1	Payenburg et al., 2002	19	NULL	Milk River/Eagle	32	56.4919	-76.6151	56.6049	-78.8366	55.6898	-81.7036	47.9202	-110.041	82	2.1	80	coastal plain	4	4. coastal plain	Eagle
	Bryopsida?	4	uncertain	80	uncertain	105	Foraminisporis sp.	116	443	Fern/Moss	2	Camp	1	Payenburg et al., 2002	19	NULL	Milk River/Eagle	32	56.4919	-76.6151	56.6049	-78.8366	55.6898	-81.7036	47.9202	-110.041	82	2.1	80	coastal plain	4	4. coastal plain	Eagle
	Bryopsida?	4	uncertain	80	uncertain	105	Foraminisporis wonthaggiensis	116	445	Fern/Moss	2	Camp	1	Payenburg et al., 2002	19	NULL	Milk River/Eagle	32	56.4919	-76.6151	56.6049	-78.8366	55.6898	-81.7036	47.9202	-110.041	82	2.1	80	coastal plain	4	4. coastal plain	Eagle
	Magnoliopsida	13	uncertain	80	uncertain	105	Fraxinoipollenites constrictus	122	463	Angiosperm	1	Camp	1	Payenburg et al., 2002	19	NULL	Milk River/Eagle	32	56.4919	-76.6151	56.6049	-78.8366	55.6898	-81.7036	47.9202	-110.041	82	2.1	80	estuarine, aquatic	7	7. estuarine, aquatic	Eagle
	Polypodiopsida	18	Gleicheniales	30	Gleicheniaceae	49	Gleicheniidites delicatus	128	481	Fern/Moss	2	Camp	1	Payenburg et al., 2002	19	NULL	Milk River/Eagle	32	56.4919	-76.6151	56.6049	-78.8366	55.6898	-81.7036	47.9202	-110.041	82	2.1	80	swampy, lagoonal	3	3. swampy, lagoonal	Eagle
	Polypodiopsida	18	Gleicheniales	30	Gleicheniaceae	49	Gleicheniidites senonicus	128	482	Fern/Moss	2	Camp	1	Payenburg et al., 2002	19	NULL	Milk River/Eagle	32	56.4919	-76.6151	56.6049	-78.8366	55.6898	-81.7036	47.9202	-110.041	82	2.1	80	swampy, lagoonal	3	3. swampy, lagoonal	Eagle
	Polypodiopsida?	19	uncertain	80	uncertain	105	Hazaria canadiana	138	504	Fern/Moss	2	Camp	1	Payenburg et al., 2002	19	NULL	Milk River/Eagle	32	56.4919	-76.6151	56.6049	-78.8366	55.6898	-81.7036	47.9202	-110.041	82	2.1	80	unknown	0	0. unknown	Eagle
	Lycopodiopsida	12	Selaginellales	73	Selaginellaceae	95	Heliosporites kemensis	140	508	Fern/Moss	2	Camp	1	Payenburg et al., 2002	19	NULL	Milk River/Eagle	32	56.4919	-76.6151	56.6049	-78.8366	55.6898	-81.7036	47.9202	-110.041	82	2.1	80	temperate lowland forest	2	2. temperate lowland forest	Eagle
	Magnoliopsida	13	Magnoliales?	39	Annonaceae?	3	Inaperturotetradites scabratus	148	529	Angiosperm	1	Camp	1	Payenburg et al., 2002	19	NULL	Milk River/Eagle	32	56.4919	-76.6151	56.6049	-78.8366	55.6898	-81.7036	47.9202	-110.041	82	2.1	80	temperate lowland forest	2	2. temperate lowland forest	Eagle
	uncertain	23	uncertain	80	uncertain	105	Integricorpus clarireticulatus	149	531	Angiosperm	1	Camp	1	Payenburg et al., 2002	19	NULL	Milk River/Eagle	32	56.4919	-76.6151	56.6049	-78.8366	55.6898	-81.7036	47.9202	-110.041	82	2.1	80	coastal plain	4	4. coastal plain	Eagle
	Bryopsida?	4	uncertain	80	uncertain	105	Interulobites sp.	151	534	Fern/Moss	2	Camp	1	Payenburg et al., 2002	19	NULL	Milk River/Eagle	32	56.4919	-76.6151	56.6049	-78.8366	55.6898	-81.7036	47.9202	-110.041	82	2.1	80	coastal plain	4	4. coastal plain	Eagle
	Polypodiopsida	18	Schizaeales	71	Schizaeaceae	93	Klukisporites foveolatus	155	544	Fern/Moss	2	Camp	1	Payenburg et al., 2002	19	NULL	Milk River/Eagle	32	56.4919	-76.6151	56.6049	-78.8366	55.6898	-81.7036	47.9202	-110.041	82	2.1	80	tropical lowland forest	6	6. tropical lowland forest	Eagle
	Polypodiopsida	18	Cyatheales	16	Cyatheaceae	31	Kuylisporites scutatus	157	555	Fern/Moss	2	Camp	1	Payenburg et al., 2002	19	NULL	Milk River/Eagle	32	56.4919	-76.6151	56.6049	-78.8366	55.6898	-81.7036	47.9202	-110.041	82	2.1	80	tropical lowland forest	6	6. tropical lowland forest	Eagle
	Polypodiopsida	18	uncertain	80	uncertain	105	Laevigatosporites haardti	158	565	Fern/Moss	2	Camp	1	Payenburg et al., 2002	19	NULL	Milk River/Eagle	32	56.4919	-76.6151	56.6049	-78.8366	55.6898	-81.7036	47.9202	-110.041	82	2.1	80	coastal plain	4	4. coastal plain	Eagle
	Lycopodiopsida	12	Selaginellales	73	Selaginellaceae	95	Liburnisporis adnacus	166	585	Fern/Moss	2	Camp	1	Payenburg et al., 2002	19	NULL	Milk River/Eagle	32	56.4919	-76.6151	56.6049	-78.8366	55.6898	-81.7036	47.9202	-110.041	82	2.1	80	temperate lowland forest	2	2. temperate lowland forest	Eagle
	Liliopsida	10	Liliales	34	uncertain	105	Liliacidites sp.	168	598	Angiosperm	1	Camp	1	Payenburg et al., 2002	19	NULL	Milk River/Eagle	32	56.4919	-76.6151	56.6049	-78.8366	55.6898	-81.7036	47.9202	-110.041	82	2.1	80	temperate lowland forest	2	2. temperate lowland forest	Eagle
	uncertain	23	uncertain	80	uncertain	105	Mancicorpus calvus	180	633	Angiosperm	1	Camp	1	Payenburg et al., 2002	19	NULL	Milk River/Eagle	32	56.4919	-76.6151	56.6049	-78.8366	55.6898	-81.7036	47.9202	-110.041	82	2.1	80	coastal plain	4	4. coastal plain	Eagle
	uncertain	23	uncertain	80	uncertain	105	Monosulcites sp.	194	687	Angiosperm	1	Camp	1	Payenburg et al., 2002	19	NULL	Milk River/Eagle	32	56.4919	-76.6151	56.6049	-78.8366	55.6898	-81.7036	47.9202	-110.041	82	2.1	80	coastal plain	4	4. coastal plain	Eagle
	Polypodiopsida	18	Gleicheniales	30	Gleicheniaceae	49	Ornamentifera baculata	213	717	Fern/Moss	2	Camp	1	Payenburg et al., 2002	19	NULL	Milk River/Eagle	32	56.4919	-76.6151	56.6049	-78.8366	55.6898	-81.7036	47.9202	-110.041	82	2.1	80	upland forest	1	1. upland forest	Eagle
	Magnoliopsida	13	Rosales	63	Rhamnaceae	85	Paliurus triplicatus	219	729	Angiosperm	1	Camp	1	Payenburg et al., 2002	19	NULL	Milk River/Eagle	32	56.4919	-76.6151	56.6049	-78.8366	55.6898	-81.7036	47.9202	-110.041	82	2.1	80	coastal plain	4	4. coastal plain	Eagle
	uncertain	23	uncertain	80	uncertain	105	Parviprojectus angulosus	224	737	Angiosperm	1	Camp	1	Payenburg et al., 2002	19	NULL	Milk River/Eagle	32	56.4919	-76.6151	56.6049	-78.8366	55.6898	-81.7036	47.9202	-110.041	82	2.1	80	wet, successional	5	5. wet, successional	Eagle
	uncertain	23	uncertain	80	uncertain	105	Penetetrapites inconspicuus	226	740	Angiosperm	1	Camp	1	Payenburg et al., 2002	19	NULL	Milk River/Eagle	32	56.4919	-76.6151	56.6049	-78.8366	55.6898	-81.7036	47.9202	-110.041	82	2.1	80	coastal plain	4	4. coastal plain	Eagle
	Magnoliopsida	13	uncertain	80	uncertain	105	Periretisyncolpites sp.	230	746	Angiosperm	1	Camp	1	Payenburg et al., 2002	19	NULL	Milk River/Eagle	32	56.4919	-76.6151	56.6049	-78.8366	55.6898	-81.7036	47.9202	-110.041	82	2.1	80	swampy, lagoonal	3	3. swampy, lagoonal	Eagle
	Polypodiopsida	18	uncertain	80	uncertain	105	Peromonolites subengelmanii	231	748	Fern/Moss	2	Camp	1	Payenburg et al., 2002	19	NULL	Milk River/Eagle	32	56.4919	-76.6151	56.6049	-78.8366	55.6898	-81.7036	47.9202	-110.041	82	2.1	80	swampy, lagoonal	3	3. swampy, lagoonal	Eagle
	Ginkgoopsida?	7	uncertain	80	uncertain	105	Pityosporites constrictus	243	769	Gymnosperm	3	Camp	1	Payenburg et al., 2002	19	NULL	Milk River/Eagle	32	56.4919	-76.6151	56.6049	-78.8366	55.6898	-81.7036	47.9202	-110.041	82	2.1	80	coastal plain	4	4. coastal plain	Eagle
	Magnoliopsida?	14	Apiales?	4	Apiaceae?	5	Pleurospermaepollenites sp.	244	775	Angiosperm	1	Camp	1	Payenburg et al., 2002	19	NULL	Milk River/Eagle	32	56.4919	-76.6151	56.6049	-78.8366	55.6898	-81.7036	47.9202	-110.041	82	2.1	80	upland forest	1	1. upland forest	Eagle
	Pinopsida	16	Pinales	54	Podocarpaceae	79	Podocarpidites canadensis	248	781	Gymnosperm	3	Camp	1	Payenburg et al., 2002	19	NULL	Milk River/Eagle	32	56.4919	-76.6151	56.6049	-78.8366	55.6898	-81.7036	47.9202	-110.041	82	2.1	80	temperate lowland forest	2	2. temperate lowland forest	Eagle
	Bryopsida?	4	uncertain	80	uncertain	105	Polycingulatisporites reduncus	252	805	Fern/Moss	2	Camp	1	Payenburg et al., 2002	19	NULL	Milk River/Eagle	32	56.4919	-76.6151	56.6049	-78.8366	55.6898	-81.7036	47.9202	-110.041	82	2.1	80	coastal plain	4	4. coastal plain	Eagle
	Pinopsida?	17	uncertain	80	uncertain	105	Pristinuspollenites microsaccus	260	820	Gymnosperm	3	Camp	1	Payenburg et al., 2002	19	NULL	Milk River/Eagle	32	56.4919	-76.6151	56.6049	-78.8366	55.6898	-81.7036	47.9202	-110.041	82	2.1	80	coastal plain	4	4. coastal plain	Eagle
	Pinopsida?	17	uncertain	80	uncertain	105	Pristinuspollenites sp.	260	821	Gymnosperm	3	Camp	1	Payenburg et al., 2002	19	NULL	Milk River/Eagle	32	56.4919	-76.6151	56.6049	-78.8366	55.6898	-81.7036	47.9202	-110.041	82	2.1	80	coastal plain	4	4. coastal plain	Eagle
	Magnoliopsida	13	Proteales	61	uncertain	105	Proteacidites thalmanii	262	835	Angiosperm	1	Camp	1	Payenburg et al., 2002	19	NULL	Milk River/Eagle	32	56.4919	-76.6151	56.6049	-78.8366	55.6898	-81.7036	47.9202	-110.041	82	2.1	80	unknown	0	0. unknown	Eagle
	Magnoliopsida	13	Fagales?	29	Juglandaceae?	56	Pseudoplicapollis newmanii	264	840	Angiosperm	1	Camp	1	Payenburg et al., 2002	19	NULL	Milk River/Eagle	32	56.4919	-76.6151	56.6049	-78.8366	55.6898	-81.7036	47.9202	-110.041	82	2.1	80	coastal plain	4	4. coastal plain	Eagle
	Liliopsida	10	Poales?	58	Juncaceae?	57	Quadripollis krempii	276	856	Angiosperm	1	Camp	1	Payenburg et al., 2002	19	NULL	Milk River/Eagle	32	56.4919	-76.6151	56.6049	-78.8366	55.6898	-81.7036	47.9202	-110.041	82	2.1	80	tropical lowland forest	6	6. tropical lowland forest	Eagle
	Polypodiopsida	18	Schizaeales	71	Schizaeaceae	93	Reticulosporis reticulatus	288	878	Fern/Moss	2	Camp	1	Payenburg et al., 2002	19	NULL	Milk River/Eagle	32	56.4919	-76.6151	56.6049	-78.8366	55.6898	-81.7036	47.9202	-110.041	82	2.1	80	coastal plain	4	4. coastal plain	Eagle
	Lycopodiopsida	12	Lycopodiales	36	Lycopodiaceae	61	Retitriletes sp.	291	897	Fern/Moss	2	Camp	1	Payenburg et al., 2002	19	NULL	Milk River/Eagle	32	56.4919	-76.6151	56.6049	-78.8366	55.6898	-81.7036	47.9202	-110.041	82	2.1	80	upland forest	1	1. upland forest	Eagle
	Pinopsida	16	Pinales	54	Cupressaceae	29	Sequoiapollenites paleocenicus	312	946	Gymnosperm	3	Camp	1	Payenburg et al., 2002	19	NULL	Milk River/Eagle	32	56.4919	-76.6151	56.6049	-78.8366	55.6898	-81.7036	47.9202	-110.041	82	2.1	80	temperate lowland forest	2	2. temperate lowland forest	Eagle
	Lycopodiopsida	12	Lycopodiales	36	Lycopodiaceae	61	Sestrosporites pseudoalveolatus	313	951	Fern/Moss	2	Camp	1	Payenburg et al., 2002	19	NULL	Milk River/Eagle	32	56.4919	-76.6151	56.6049	-78.8366	55.6898	-81.7036	47.9202	-110.041	82	2.1	80	upland forest	1	1. upland forest	Eagle
	uncertain	23	uncertain	80	uncertain	105	Siberiapollis sp.	314	953	Angiosperm	1	Camp	1	Payenburg et al., 2002	19	NULL	Milk River/Eagle	32	56.4919	-76.6151	56.6049	-78.8366	55.6898	-81.7036	47.9202	-110.041	82	2.1	80	coastal plain	4	4. coastal plain	Eagle
	Bryopsida	3	uncertain	80	uncertain	105	Stereisporites antiquasporites	329	987	Fern/Moss	2	Camp	1	Payenburg et al., 2002	19	NULL	Milk River/Eagle	32	56.4919	-76.6151	56.6049	-78.8366	55.6898	-81.7036	47.9202	-110.041	82	2.1	80	coastal plain	4	4. coastal plain	Eagle
	Bryopsida	3	uncertain	80	uncertain	105	Stereisporites regium	329	990	Fern/Moss	2	Camp	1	Payenburg et al., 2002	19	NULL	Milk River/Eagle	32	56.4919	-76.6151	56.6049	-78.8366	55.6898	-81.7036	47.9202	-110.041	82	2.1	80	coastal plain	4	4. coastal plain	Eagle
	Pinopsida	16	Pinales	54	Cupressaceae?	30	Taxodiaceaepollenites hiatus	343	1015	Gymnosperm	3	Camp	1	Payenburg et al., 2002	19	NULL	Milk River/Eagle	32	56.4919	-76.6151	56.6049	-78.8366	55.6898	-81.7036	47.9202	-110.041	82	2.1	80	temperate lowland forest	2	2. temperate lowland forest	Eagle
	Pinopsida	16	Pinales	54	Cupressaceae?	30	Taxodiaceaepollenites vacuipites	343	1018	Gymnosperm	3	Camp	1	Payenburg et al., 2002	19	NULL	Milk River/Eagle	32	56.4919	-76.6151	56.6049	-78.8366	55.6898	-81.7036	47.9202	-110.041	82	2.1	80	temperate lowland forest	2	2. temperate lowland forest	Eagle
	Polypodiopsida	18	Polypodiales	59	uncertain	105	Tigrisporites scurrandus	349	1026	Fern/Moss	2	Camp	1	Payenburg et al., 2002	19	NULL	Milk River/Eagle	32	56.4919	-76.6151	56.6049	-78.8366	55.6898	-81.7036	47.9202	-110.041	82	2.1	80	temperate lowland forest	2	2. temperate lowland forest	Eagle
	Bryopsida	3	uncertain	80	uncertain	105	Triporoletes involucratus	369	1125	Fern/Moss	2	Camp	1	Payenburg et al., 2002	19	NULL	Milk River/Eagle	32	56.4919	-76.6151	56.6049	-78.8366	55.6898	-81.7036	47.9202	-110.041	82	2.1	80	temperate lowland forest	2	2. temperate lowland forest	Eagle
	Pinopsida	16	uncertain	80	uncertain	105	Uesuguipollenites callosus	379	1159	Gymnosperm	3	Camp	1	Payenburg et al., 2002	19	NULL	Milk River/Eagle	32	56.4919	-76.6151	56.6049	-78.8366	55.6898	-81.7036	47.9202	-110.041	82	2.1	80	temperate lowland forest	2	2. temperate lowland forest	Eagle
	Polypodiopsida?	19	uncertain	80	uncertain	105	Umbosporites callosus	382	1167	Fern/Moss	2	Camp	1	Payenburg et al., 2002	19	NULL	Milk River/Eagle	32	56.4919	-76.6151	56.6049	-78.8366	55.6898	-81.7036	47.9202	-110.041	82	2.1	80	coastal plain	4	4. coastal plain	Eagle
	Polypodiopsida	18	Schizaeales	71	Lygodiaceae	63	Varirugosisporites tolmanensis	384	1171	Fern/Moss	2	Camp	1	Payenburg et al., 2002	19	NULL	Milk River/Eagle	32	56.4919	-76.6151	56.6049	-78.8366	55.6898	-81.7036	47.9202	-110.041	82	2.1	80	tropical lowland forest	6	6. tropical lowland forest	Eagle
	Pteridospermatopsida?	21	Caytoniales?	11	Caytoniaceae?	22	Vitreisporites pallidus	393	1186	Gymnosperm	3	Camp	1	Payenburg et al., 2002	19	NULL	Milk River/Eagle	32	56.4919	-76.6151	56.6049	-78.8366	55.6898	-81.7036	47.9202	-110.041	82	2.1	80	temperate lowland forest	2	2. temperate lowland forest	Eagle
	Marchantiopsida	15	uncertain	80	uncertain	105	Zlivisporis cenomanianus	397	1199	Fern/Moss	2	Camp	1	Payenburg et al., 2002	19	NULL	Milk River/Eagle	32	56.4919	-76.6151	56.6049	-78.8366	55.6898	-81.7036	47.9202	-110.041	82	2.1	80	swampy, lagoonal	3	3. swampy, lagoonal	Eagle
	Marchantiopsida	15	uncertain	80	uncertain	105	Zlivisporis simplex	397	1202	Fern/Moss	2	Camp	1	Payenburg et al., 2002	19	NULL	Milk River/Eagle	32	56.4919	-76.6151	56.6049	-78.8366	55.6898	-81.7036	47.9202	-110.041	82	2.1	80	swampy, lagoonal	3	3. swampy, lagoonal	Eagle
	Marchantiopsida	15	uncertain	80	uncertain	105	Zlivisporis sp.	397	1203	Fern/Moss	2	Camp	1	Payenburg et al., 2002	19	NULL	Milk River/Eagle	32	56.4919	-76.6151	56.6049	-78.8366	55.6898	-81.7036	47.9202	-110.041	82	2.1	80	swampy, lagoonal	3	3. swampy, lagoonal	Eagle
	Magnoliopsida	13	uncertain	80	uncertain	105	Accuratipollis lactifluminis	5	11	Angiosperm	1	Camp	1	Payenburg et al., 2002	19	NULL	Milk River/Eagle	32	57.9031	-77.4519	58.0094	-79.7138	57.0865	-82.6002	49.1077	-111.38	82	2.1	80	swampy, lagoonal	3	3. swampy, lagoonal	WOSPP
	Pinopsida	16	Pinales?	55	uncertain	105	Alisporites bilateralis	13	29	Gymnosperm	3	Camp	1	Payenburg et al., 2002	19	NULL	Milk River/Eagle	32	57.9031	-77.4519	58.0094	-79.7138	57.0865	-82.6002	49.1077	-111.38	82	2.1	80	coastal plain	4	4. coastal plain	WOSPP
	Anthocerotopsida	1	Notothyladales?	48	Notothyladaceae?	69	Annulispora salsa	19	46	Fern/Moss	2	Camp	1	Payenburg et al., 2002	19	NULL	Milk River/Eagle	32	57.9031	-77.4519	58.0094	-79.7138	57.0865	-82.6002	49.1077	-111.38	82	2.1	80	tropical lowland forest	6	6. tropical lowland forest	WOSPP
	Polypodiopsida	18	Schizaeales	71	uncertain	105	Appendicisporites auritus	21	48	Fern/Moss	2	Camp	1	Payenburg et al., 2002	19	NULL	Milk River/Eagle	32	57.9031	-77.4519	58.0094	-79.7138	57.0865	-82.6002	49.1077	-111.38	82	2.1	80	temperate lowland forest	2	2. temperate lowland forest	WOSPP
	Magnoliopsida	13	Santalales?	66	Santalaceae?	90	Aquilapollenites attenuatus	22	69	Angiosperm	1	Camp	1	Payenburg et al., 2002	19	NULL	Milk River/Eagle	32	57.9031	-77.4519	58.0094	-79.7138	57.0865	-82.6002	49.1077	-111.38	82	2.1	80	temperate lowland forest	2	2. temperate lowland forest	WOSPP
	Magnoliopsida	13	Santalales?	66	Santalaceae?	90	Aquilapollenites sp.	22	131	Angiosperm	1	Camp	1	Payenburg et al., 2002	19	NULL	Milk River/Eagle	32	57.9031	-77.4519	58.0094	-79.7138	57.0865	-82.6002	49.1077	-111.38	82	2.1	80	temperate lowland forest	2	2. temperate lowland forest	WOSPP
	Polypodiopsida	18	uncertain	80	uncertain	105	Baculatisporites comaumensis	30	181	Fern/Moss	2	Camp	1	Payenburg et al., 2002	19	NULL	Milk River/Eagle	32	57.9031	-77.4519	58.0094	-79.7138	57.0865	-82.6002	49.1077	-111.38	82	2.1	80	coastal plain	4	4. coastal plain	WOSPP
	Polypodiopsida	18	Schizaeales	71	Schizaeaceae	93	Biretisporites sp.	38	208	Fern/Moss	2	Camp	1	Payenburg et al., 2002	19	NULL	Milk River/Eagle	32	57.9031	-77.4519	58.0094	-79.7138	57.0865	-82.6002	49.1077	-111.38	82	2.1	80	temperate lowland forest	2	2. temperate lowland forest	WOSPP
	Cycadopsida?	6	Cycadales?	19	uncertain	105	Brevimonosulcites corrugatus	40	210	Gymnosperm	3	Camp	1	Payenburg et al., 2002	19	NULL	Milk River/Eagle	32	57.9031	-77.4519	58.0094	-79.7138	57.0865	-82.6002	49.1077	-111.38	82	2.1	80	temperate lowland forest	2	2. temperate lowland forest	WOSPP
	Pinopsida	16	Pinales	54	uncertain	105	Callialasporites dampieri	42	213	Gymnosperm	3	Camp	1	Payenburg et al., 2002	19	NULL	Milk River/Eagle	32	57.9031	-77.4519	58.0094	-79.7138	57.0865	-82.6002	49.1077	-111.38	82	2.1	80	upland forest	1	1. upland forest	WOSPP
	Lycopodiopsida	12	Lycopodiales	36	uncertain	105	Camarozonosporites insignis	44	225	Fern/Moss	2	Camp	1	Payenburg et al., 2002	19	NULL	Milk River/Eagle	32	57.9031	-77.4519	58.0094	-79.7138	57.0865	-82.6002	49.1077	-111.38	82	2.1	80	coastal plain	4	4. coastal plain	WOSPP
	Polypodiopsida	18	Schizaeales	71	Schizaeaceae	93	Cicatricosisporites sp.	58	273	Fern/Moss	2	Camp	1	Payenburg et al., 2002	19	NULL	Milk River/Eagle	32	57.9031	-77.4519	58.0094	-79.7138	57.0865	-82.6002	49.1077	-111.38	82	2.1	80	temperate lowland forest	2	2. temperate lowland forest	WOSPP
	Polypodiopsida?	19	uncertain	80	uncertain	105	Circumflexipollis tilioides	63	292	Fern/Moss	2	Camp	1	Payenburg et al., 2002	19	NULL	Milk River/Eagle	32	57.9031	-77.4519	58.0094	-79.7138	57.0865	-82.6002	49.1077	-111.38	82	2.1	80	open scrubland	8	8. open scrubland	WOSPP
	Pinopsida	16	Pinales	54	Cheirolepidiaceae	25	Classopollis classoides	65	297	Gymnosperm	3	Camp	1	Payenburg et al., 2002	19	NULL	Milk River/Eagle	32	57.9031	-77.4519	58.0094	-79.7138	57.0865	-82.6002	49.1077	-111.38	82	2.1	80	temperate lowland forest	2	2. temperate lowland forest	WOSPP
	Polypodiopsida	18	Cyatheales?	17	Cyatheaceae?	32	Cyathidites australis	82	345	Fern/Moss	2	Camp	1	Payenburg et al., 2002	19	NULL	Milk River/Eagle	32	57.9031	-77.4519	58.0094	-79.7138	57.0865	-82.6002	49.1077	-111.38	82	2.1	80	temperate lowland forest	2	2. temperate lowland forest	WOSPP
	Polypodiopsida	18	Cyatheales?	17	Cyatheaceae?	32	Cyathidites minor	82	349	Fern/Moss	2	Camp	1	Payenburg et al., 2002	19	NULL	Milk River/Eagle	32	57.9031	-77.4519	58.0094	-79.7138	57.0865	-82.6002	49.1077	-111.38	82	2.1	80	temperate lowland forest	2	2. temperate lowland forest	WOSPP
	Cycadopsida	5	Cycadales?	19	uncertain	105	Cycadopites fragilis	84	358	Gymnosperm	3	Camp	1	Payenburg et al., 2002	19	NULL	Milk River/Eagle	32	57.9031	-77.4519	58.0094	-79.7138	57.0865	-82.6002	49.1077	-111.38	82	2.1	80	tropical lowland forest	6	6. tropical lowland forest	WOSPP
	Polypodiopsida	18	uncertain	80	uncertain	105	Deltoidospora diaphana	86	365	Fern/Moss	2	Camp	1	Payenburg et al., 2002	19	NULL	Milk River/Eagle	32	57.9031	-77.4519	58.0094	-79.7138	57.0865	-82.6002	49.1077	-111.38	82	2.1	80	temperate lowland forest	2	2. temperate lowland forest	WOSPP
	Polypodiopsida	18	Schizaeales	71	Schizaeaceae	93	Distaltriangulisporites irregularis	91	375	Fern/Moss	2	Camp	1	Payenburg et al., 2002	19	NULL	Milk River/Eagle	32	57.9031	-77.4519	58.0094	-79.7138	57.0865	-82.6002	49.1077	-111.38	82	2.1	80	tropical lowland forest	6	6. tropical lowland forest	WOSPP
	Lycopodiopsida	12	Selaginellales?	74	Selaginellaceae?	96	Echinatisporis sp.	97	387	Fern/Moss	2	Camp	1	Payenburg et al., 2002	19	NULL	Milk River/Eagle	32	57.9031	-77.4519	58.0094	-79.7138	57.0865	-82.6002	49.1077	-111.38	82	2.1	80	estuarine, aquatic	7	7. estuarine, aquatic	WOSPP
	Bryopsida?	4	uncertain	80	uncertain	105	Foraminisporis semiscalaris	116	442	Fern/Moss	2	Camp	1	Payenburg et al., 2002	19	NULL	Milk River/Eagle	32	57.9031	-77.4519	58.0094	-79.7138	57.0865	-82.6002	49.1077	-111.38	82	2.1	80	coastal plain	4	4. coastal plain	WOSPP
	Bryopsida?	4	uncertain	80	uncertain	105	Foraminisporis sp.	116	443	Fern/Moss	2	Camp	1	Payenburg et al., 2002	19	NULL	Milk River/Eagle	32	57.9031	-77.4519	58.0094	-79.7138	57.0865	-82.6002	49.1077	-111.38	82	2.1	80	coastal plain	4	4. coastal plain	WOSPP
	Bryopsida?	4	uncertain	80	uncertain	105	Foraminisporis wonthaggiensis	116	445	Fern/Moss	2	Camp	1	Payenburg et al., 2002	19	NULL	Milk River/Eagle	32	57.9031	-77.4519	58.0094	-79.7138	57.0865	-82.6002	49.1077	-111.38	82	2.1	80	coastal plain	4	4. coastal plain	WOSPP
	Magnoliopsida	13	uncertain	80	uncertain	105	Fraxinoipollenites constrictus	122	463	Angiosperm	1	Camp	1	Payenburg et al., 2002	19	NULL	Milk River/Eagle	32	57.9031	-77.4519	58.0094	-79.7138	57.0865	-82.6002	49.1077	-111.38	82	2.1	80	estuarine, aquatic	7	7. estuarine, aquatic	WOSPP
	Polypodiopsida	18	Gleicheniales	30	Gleicheniaceae	49	Gleicheniidites delicatus	128	481	Fern/Moss	2	Camp	1	Payenburg et al., 2002	19	NULL	Milk River/Eagle	32	57.9031	-77.4519	58.0094	-79.7138	57.0865	-82.6002	49.1077	-111.38	82	2.1	80	swampy, lagoonal	3	3. swampy, lagoonal	WOSPP
	Polypodiopsida	18	Gleicheniales	30	Gleicheniaceae	49	Gleicheniidites senonicus	128	482	Fern/Moss	2	Camp	1	Payenburg et al., 2002	19	NULL	Milk River/Eagle	32	57.9031	-77.4519	58.0094	-79.7138	57.0865	-82.6002	49.1077	-111.38	82	2.1	80	swampy, lagoonal	3	3. swampy, lagoonal	WOSPP
	Polypodiopsida?	19	uncertain	80	uncertain	105	Hazaria canadiana	138	504	Fern/Moss	2	Camp	1	Payenburg et al., 2002	19	NULL	Milk River/Eagle	32	57.9031	-77.4519	58.0094	-79.7138	57.0865	-82.6002	49.1077	-111.38	82	2.1	80	unknown	0	0. unknown	WOSPP
	Lycopodiopsida	12	Selaginellales	73	Selaginellaceae	95	Heliosporites kemensis	140	508	Fern/Moss	2	Camp	1	Payenburg et al., 2002	19	NULL	Milk River/Eagle	32	57.9031	-77.4519	58.0094	-79.7138	57.0865	-82.6002	49.1077	-111.38	82	2.1	80	temperate lowland forest	2	2. temperate lowland forest	WOSPP
	Bryopsida?	4	uncertain	80	uncertain	105	Interulobites sp.	151	534	Fern/Moss	2	Camp	1	Payenburg et al., 2002	19	NULL	Milk River/Eagle	32	57.9031	-77.4519	58.0094	-79.7138	57.0865	-82.6002	49.1077	-111.38	82	2.1	80	coastal plain	4	4. coastal plain	WOSPP
	Polypodiopsida	18	Schizaeales	71	Schizaeaceae	93	Klukisporites foveolatus	155	544	Fern/Moss	2	Camp	1	Payenburg et al., 2002	19	NULL	Milk River/Eagle	32	57.9031	-77.4519	58.0094	-79.7138	57.0865	-82.6002	49.1077	-111.38	82	2.1	80	tropical lowland forest	6	6. tropical lowland forest	WOSPP
	Polypodiopsida	18	Cyatheales	16	Cyatheaceae	31	Kuylisporites scutatus	157	555	Fern/Moss	2	Camp	1	Payenburg et al., 2002	19	NULL	Milk River/Eagle	32	57.9031	-77.4519	58.0094	-79.7138	57.0865	-82.6002	49.1077	-111.38	82	2.1	80	tropical lowland forest	6	6. tropical lowland forest	WOSPP
	Polypodiopsida	18	uncertain	80	uncertain	105	Laevigatosporites haardti	158	565	Fern/Moss	2	Camp	1	Payenburg et al., 2002	19	NULL	Milk River/Eagle	32	57.9031	-77.4519	58.0094	-79.7138	57.0865	-82.6002	49.1077	-111.38	82	2.1	80	coastal plain	4	4. coastal plain	WOSPP
	Lycopodiopsida	12	uncertain	80	uncertain	105	Leptolepidites crepitus	162	578	Fern/Moss	2	Camp	1	Payenburg et al., 2002	19	NULL	Milk River/Eagle	32	57.9031	-77.4519	58.0094	-79.7138	57.0865	-82.6002	49.1077	-111.38	82	2.1	80	coastal plain	4	4. coastal plain	WOSPP
	Liliopsida	10	Liliales	34	uncertain	105	Liliacidites variegatus	168	600	Angiosperm	1	Camp	1	Payenburg et al., 2002	19	NULL	Milk River/Eagle	32	57.9031	-77.4519	58.0094	-79.7138	57.0865	-82.6002	49.1077	-111.38	82	2.1	80	temperate lowland forest	2	2. temperate lowland forest	WOSPP
	uncertain	23	uncertain	80	uncertain	105	Lusatisporis dettmannae	172	607	Fern/Moss	2	Camp	1	Payenburg et al., 2002	19	NULL	Milk River/Eagle	32	57.9031	-77.4519	58.0094	-79.7138	57.0865	-82.6002	49.1077	-111.38	82	2.1	80	open scrubland	8	8. open scrubland	WOSPP
	uncertain	23	uncertain	80	uncertain	105	Mancicorpus calvus	180	633	Angiosperm	1	Camp	1	Payenburg et al., 2002	19	NULL	Milk River/Eagle	32	57.9031	-77.4519	58.0094	-79.7138	57.0865	-82.6002	49.1077	-111.38	82	2.1	80	coastal plain	4	4. coastal plain	WOSPP
	uncertain	23	uncertain	80	uncertain	105	Monosulcites sp.	194	687	Angiosperm	1	Camp	1	Payenburg et al., 2002	19	NULL	Milk River/Eagle	32	57.9031	-77.4519	58.0094	-79.7138	57.0865	-82.6002	49.1077	-111.38	82	2.1	80	coastal plain	4	4. coastal plain	WOSPP
	Magnoliopsida	13	Rosales	63	Rhamnaceae	85	Paliurus triplicatus	219	729	Angiosperm	1	Camp	1	Payenburg et al., 2002	19	NULL	Milk River/Eagle	32	57.9031	-77.4519	58.0094	-79.7138	57.0865	-82.6002	49.1077	-111.38	82	2.1	80	coastal plain	4	4. coastal plain	WOSPP
	Ginkgoopsida?	7	uncertain	80	uncertain	105	Pityosporites constrictus	243	769	Gymnosperm	3	Camp	1	Payenburg et al., 2002	19	NULL	Milk River/Eagle	32	57.9031	-77.4519	58.0094	-79.7138	57.0865	-82.6002	49.1077	-111.38	82	2.1	80	coastal plain	4	4. coastal plain	WOSPP
	Pinopsida	16	Pinales	54	Podocarpaceae	79	Podocarpidites canadensis	248	781	Gymnosperm	3	Camp	1	Payenburg et al., 2002	19	NULL	Milk River/Eagle	32	57.9031	-77.4519	58.0094	-79.7138	57.0865	-82.6002	49.1077	-111.38	82	2.1	80	temperate lowland forest	2	2. temperate lowland forest	WOSPP
	Pinopsida	16	Pinales	54	Podocarpaceae	79	Podocarpidites multesimus	248	788	Gymnosperm	3	Camp	1	Payenburg et al., 2002	19	NULL	Milk River/Eagle	32	57.9031	-77.4519	58.0094	-79.7138	57.0865	-82.6002	49.1077	-111.38	82	2.1	80	temperate lowland forest	2	2. temperate lowland forest	WOSPP
	Bryopsida?	4	uncertain	80	uncertain	105	Polycingulatisporites reduncus	252	805	Fern/Moss	2	Camp	1	Payenburg et al., 2002	19	NULL	Milk River/Eagle	32	57.9031	-77.4519	58.0094	-79.7138	57.0865	-82.6002	49.1077	-111.38	82	2.1	80	coastal plain	4	4. coastal plain	WOSPP
	Pinopsida?	17	uncertain	80	uncertain	105	Pristinuspollenites microsaccus	260	820	Gymnosperm	3	Camp	1	Payenburg et al., 2002	19	NULL	Milk River/Eagle	32	57.9031	-77.4519	58.0094	-79.7138	57.0865	-82.6002	49.1077	-111.38	82	2.1	80	coastal plain	4	4. coastal plain	WOSPP
	Pinopsida?	17	uncertain	80	uncertain	105	Pristinuspollenites sp.	260	821	Gymnosperm	3	Camp	1	Payenburg et al., 2002	19	NULL	Milk River/Eagle	32	57.9031	-77.4519	58.0094	-79.7138	57.0865	-82.6002	49.1077	-111.38	82	2.1	80	coastal plain	4	4. coastal plain	WOSPP
	Magnoliopsida	13	Proteales	61	uncertain	105	Proteacidites thalmanii	262	835	Angiosperm	1	Camp	1	Payenburg et al., 2002	19	NULL	Milk River/Eagle	32	57.9031	-77.4519	58.0094	-79.7138	57.0865	-82.6002	49.1077	-111.38	82	2.1	80	unknown	0	0. unknown	WOSPP
	Magnoliopsida	13	Fagales?	29	Juglandaceae?	56	Pseudoplicapollis newmanii	264	840	Angiosperm	1	Camp	1	Payenburg et al., 2002	19	NULL	Milk River/Eagle	32	57.9031	-77.4519	58.0094	-79.7138	57.0865	-82.6002	49.1077	-111.38	82	2.1	80	coastal plain	4	4. coastal plain	WOSPP
	Lycopodiopsida	12	Lycopodiales	36	Lycopodiaceae	61	Retitriletes sp.	291	897	Fern/Moss	2	Camp	1	Payenburg et al., 2002	19	NULL	Milk River/Eagle	32	57.9031	-77.4519	58.0094	-79.7138	57.0865	-82.6002	49.1077	-111.38	82	2.1	80	upland forest	1	1. upland forest	WOSPP
	Pinopsida	16	uncertain	80	uncertain	105	Rugubivesiculites reductus	297	914	Gymnosperm	3	Camp	1	Payenburg et al., 2002	19	NULL	Milk River/Eagle	32	57.9031	-77.4519	58.0094	-79.7138	57.0865	-82.6002	49.1077	-111.38	82	2.1	80	coastal plain	4	4. coastal plain	WOSPP
	Lycopodiopsida	12	Lycopodiales	36	Lycopodiaceae	61	Sestrosporites pseudoalveolatus	313	951	Fern/Moss	2	Camp	1	Payenburg et al., 2002	19	NULL	Milk River/Eagle	32	57.9031	-77.4519	58.0094	-79.7138	57.0865	-82.6002	49.1077	-111.38	82	2.1	80	upland forest	1	1. upland forest	WOSPP
	Bryopsida	3	uncertain	80	uncertain	105	Stereisporites antiquasporites	329	987	Fern/Moss	2	Camp	1	Payenburg et al., 2002	19	NULL	Milk River/Eagle	32	57.9031	-77.4519	58.0094	-79.7138	57.0865	-82.6002	49.1077	-111.38	82	2.1	80	coastal plain	4	4. coastal plain	WOSPP
	Bryopsida	3	uncertain	80	uncertain	105	Stereisporites regium	329	990	Fern/Moss	2	Camp	1	Payenburg et al., 2002	19	NULL	Milk River/Eagle	32	57.9031	-77.4519	58.0094	-79.7138	57.0865	-82.6002	49.1077	-111.38	82	2.1	80	coastal plain	4	4. coastal plain	WOSPP
	Pinopsida	16	Pinales	54	Cupressaceae?	30	Taxodiaceaepollenites hiatus	343	1015	Gymnosperm	3	Camp	1	Payenburg et al., 2002	19	NULL	Milk River/Eagle	32	57.9031	-77.4519	58.0094	-79.7138	57.0865	-82.6002	49.1077	-111.38	82	2.1	80	temperate lowland forest	2	2. temperate lowland forest	WOSPP
	Pinopsida	16	Pinales	54	Cupressaceae?	30	Taxodiaceaepollenites vacuipites	343	1018	Gymnosperm	3	Camp	1	Payenburg et al., 2002	19	NULL	Milk River/Eagle	32	57.9031	-77.4519	58.0094	-79.7138	57.0865	-82.6002	49.1077	-111.38	82	2.1	80	temperate lowland forest	2	2. temperate lowland forest	WOSPP
	Magnoliopsida	13	Magnoliales?	39	uncertain	105	Tricolpites sp.	358	1078	Angiosperm	1	Camp	1	Payenburg et al., 2002	19	NULL	Milk River/Eagle	32	57.9031	-77.4519	58.0094	-79.7138	57.0865	-82.6002	49.1077	-111.38	82	2.1	80	coastal plain	4	4. coastal plain	WOSPP
	Bryopsida	3	uncertain	80	uncertain	105	Triporoletes involucratus	369	1125	Fern/Moss	2	Camp	1	Payenburg et al., 2002	19	NULL	Milk River/Eagle	32	57.9031	-77.4519	58.0094	-79.7138	57.0865	-82.6002	49.1077	-111.38	82	2.1	80	temperate lowland forest	2	2. temperate lowland forest	WOSPP
	Bryopsida	3	uncertain	80	uncertain	105	Triporoletes singularis	369	1127	Fern/Moss	2	Camp	1	Payenburg et al., 2002	19	NULL	Milk River/Eagle	32	57.9031	-77.4519	58.0094	-79.7138	57.0865	-82.6002	49.1077	-111.38	82	2.1	80	temperate lowland forest	2	2. temperate lowland forest	WOSPP
	Polypodiopsida?	19	uncertain	80	uncertain	105	Umbosporites callosus	382	1167	Fern/Moss	2	Camp	1	Payenburg et al., 2002	19	NULL	Milk River/Eagle	32	57.9031	-77.4519	58.0094	-79.7138	57.0865	-82.6002	49.1077	-111.38	82	2.1	80	coastal plain	4	4. coastal plain	WOSPP
	Polypodiopsida	18	Schizaeales	71	Lygodiaceae	63	Varirugosisporites tolmanensis	384	1171	Fern/Moss	2	Camp	1	Payenburg et al., 2002	19	NULL	Milk River/Eagle	32	57.9031	-77.4519	58.0094	-79.7138	57.0865	-82.6002	49.1077	-111.38	82	2.1	80	tropical lowland forest	6	6. tropical lowland forest	WOSPP
	Pteridospermatopsida?	21	Caytoniales?	11	Caytoniaceae?	22	Vitreisporites pallidus	393	1186	Gymnosperm	3	Camp	1	Payenburg et al., 2002	19	NULL	Milk River/Eagle	32	57.9031	-77.4519	58.0094	-79.7138	57.0865	-82.6002	49.1077	-111.38	82	2.1	80	temperate lowland forest	2	2. temperate lowland forest	WOSPP
	Marchantiopsida	15	uncertain	80	uncertain	105	Zlivisporis cenomanianus	397	1199	Fern/Moss	2	Camp	1	Payenburg et al., 2002	19	NULL	Milk River/Eagle	32	57.9031	-77.4519	58.0094	-79.7138	57.0865	-82.6002	49.1077	-111.38	82	2.1	80	swampy, lagoonal	3	3. swampy, lagoonal	WOSPP
	Marchantiopsida	15	uncertain	80	uncertain	105	Zlivisporis sp.	397	1203	Fern/Moss	2	Camp	1	Payenburg et al., 2002	19	NULL	Milk River/Eagle	32	57.9031	-77.4519	58.0094	-79.7138	57.0865	-82.6002	49.1077	-111.38	82	2.1	80	swampy, lagoonal	3	3. swampy, lagoonal	WOSPP
	Magnoliopsida	13	Fagales	28	Betulaceae	16	Betula sp.	33	200	Angiosperm	1	Camp	1	Radforth and Rouse, 1953	21	NULL	Brazeau	12	63.2201	-82.1035	63.2886	-84.5542	62.3271	-87.4706	53.3562	-117.658	72.1	NaN	70	temperate lowland forest	2	2. temperate lowland forest	NULL
	Magnoliopsida	13	Fagales	28	Betulaceae	16	Betula claripites	33	198	Angiosperm	1	Camp	1	Radforth and Rouse, 1953	21	NULL	Brazeau	12	63.2201	-82.1035	63.2886	-84.5542	62.3271	-87.4706	53.3562	-117.658	72.1	NaN	70	temperate lowland forest	2	2. temperate lowland forest	NULL
	Magnoliopsida	13	Fagales	28	Juglandaceae	55	Carya viridifluminipites	49	233	Angiosperm	1	Camp	1	Radforth and Rouse, 1953	21	NULL	Brazeau	12	63.2201	-82.1035	63.2886	-84.5542	62.3271	-87.4706	53.3562	-117.658	72.1	NaN	70	temperate lowland forest	2	2. temperate lowland forest	NULL
	Cycadopsida	5	Cycadales?	19	uncertain	105	Cycadopites sp.	84	361	Gymnosperm	3	Camp	1	Radforth and Rouse, 1953	21	NULL	Brazeau	12	63.2201	-82.1035	63.2886	-84.5542	62.3271	-87.4706	53.3562	-117.658	72.1	NaN	70	tropical lowland forest	6	6. tropical lowland forest	NULL
	Polypodiopsida	18	Equisetales	22	Equisetaceae	39	Equisetosporites chinleana	106	410	Fern/Moss	2	Camp	1	Radforth and Rouse, 1953	21	NULL	Brazeau	12	63.2201	-82.1035	63.2886	-84.5542	62.3271	-87.4706	53.3562	-117.658	72.1	NaN	70	open scrubland	8	8. open scrubland	NULL
	Polypodiopsida	18	uncertain	80	uncertain	105	Laevigatosporites spp.	158	570	Fern/Moss	2	Camp	1	Radforth and Rouse, 1953	21	NULL	Brazeau	12	63.2201	-82.1035	63.2886	-84.5542	62.3271	-87.4706	53.3562	-117.658	72.1	NaN	70	coastal plain	4	4. coastal plain	NULL
	Lycopodiopsida	12	Lycopodiales	36	Lycopodiaceae	61	Lycopodium sp.	174	615	Fern/Moss	2	Camp	1	Radforth and Rouse, 1953	21	NULL	Brazeau	12	63.2201	-82.1035	63.2886	-84.5542	62.3271	-87.4706	53.3562	-117.658	72.1	NaN	70	upland forest	1	1. upland forest	NULL
	Polypodiopsida	18	Schizaeales	71	Anemiaceae	2	Mohria sp.	189	665	Fern/Moss	2	Camp	1	Radforth and Rouse, 1953	21	NULL	Brazeau	12	63.2201	-82.1035	63.2886	-84.5542	62.3271	-87.4706	53.3562	-117.658	72.1	NaN	70	open scrubland	8	8. open scrubland	NULL
	Magnoliopsida	13	uncertain	80	uncertain	105	Momipites coryloides	190	667	Angiosperm	1	Camp	1	Radforth and Rouse, 1953	21	NULL	Brazeau	12	63.2201	-82.1035	63.2886	-84.5542	62.3271	-87.4706	53.3562	-117.658	72.1	NaN	70	temperate lowland forest	2	2. temperate lowland forest	NULL
	Pinopsida	16	Pinales	54	Pinaceae	76	Pinus sp.	240	761	Gymnosperm	3	Camp	1	Radforth and Rouse, 1953	21	NULL	Brazeau	12	63.2201	-82.1035	63.2886	-84.5542	62.3271	-87.4706	53.3562	-117.658	72.1	NaN	70	temperate lowland forest	2	2. temperate lowland forest	NULL
	Pinopsida	16	Pinales	54	Podocarpaceae	79	Podocarpus sp.	250	797	Gymnosperm	3	Camp	1	Radforth and Rouse, 1953	21	NULL	Brazeau	12	63.2201	-82.1035	63.2886	-84.5542	62.3271	-87.4706	53.3562	-117.658	72.1	NaN	70	temperate lowland forest	2	2. temperate lowland forest	NULL
	Pinopsida	16	Pinales	54	Cupressaceae	29	Pollenites magnus dubius	251	799	Gymnosperm	3	Camp	1	Radforth and Rouse, 1953	21	NULL	Brazeau	12	63.2201	-82.1035	63.2886	-84.5542	62.3271	-87.4706	53.3562	-117.658	72.1	NaN	70	unknown	0	0. unknown	NULL
	Pinopsida	16	Pinales	54	Cupressaceae	29	Pollenites megagerirudae	251	800	Gymnosperm	3	Camp	1	Radforth and Rouse, 1953	21	NULL	Brazeau	12	63.2201	-82.1035	63.2886	-84.5542	62.3271	-87.4706	53.3562	-117.658	72.1	NaN	70	unknown	0	0. unknown	NULL
	Pinopsida	16	Pinales	54	Cupressaceae	29	Pollenites polyformosus	251	801	Gymnosperm	3	Camp	1	Radforth and Rouse, 1953	21	NULL	Brazeau	12	63.2201	-82.1035	63.2886	-84.5542	62.3271	-87.4706	53.3562	-117.658	72.1	NaN	70	unknown	0	0. unknown	NULL
	Pinopsida	16	Pinales	54	Cupressaceae	29	Pollenites problematicus	251	802	Gymnosperm	3	Camp	1	Radforth and Rouse, 1953	21	NULL	Brazeau	12	63.2201	-82.1035	63.2886	-84.5542	62.3271	-87.4706	53.3562	-117.658	72.1	NaN	70	unknown	0	0. unknown	NULL
	Polypodiopsida	18	Polypodiales	59	Polypodiaceae	81	Polypodiumsporites alienus	256	816	Fern/Moss	2	Camp	1	Radforth and Rouse, 1953	21	NULL	Brazeau	12	63.2201	-82.1035	63.2886	-84.5542	62.3271	-87.4706	53.3562	-117.658	72.1	NaN	70	temperate lowland forest	2	2. temperate lowland forest	NULL
	Lycopodiopsida	12	uncertain	80	uncertain	105	Raistrickia sp.	282	867	Fern/Moss	2	Camp	1	Radforth and Rouse, 1953	21	NULL	Brazeau	12	63.2201	-82.1035	63.2886	-84.5542	62.3271	-87.4706	53.3562	-117.658	72.1	NaN	70	coastal plain	4	4. coastal plain	NULL
	Sphagnopsida	22	Sphagnales	76	Sphagnaceae	99	Sphagnum antiquasporites	321	961	Fern/Moss	2	Camp	1	Radforth and Rouse, 1953	21	NULL	Brazeau	12	63.2201	-82.1035	63.2886	-84.5542	62.3271	-87.4706	53.3562	-117.658	72.1	NaN	70	swampy, lagoonal	3	3. swampy, lagoonal	NULL
	Pinopsida	16	Pinales?	55	Pinaceae?	77	Abietineaepollenites sp.	2	4	Gymnosperm	3	Camp	1	Roberts, 1972	22	NULL	Cokedale (Livingston Group)	14	54.542	-78.6677	54.639	-80.8463	53.707	-83.6157	45.7049	-110.763	77.45	2.25	75	upland forest	1	1. upland forest	NULL
	Magnoliopsida	13	Fagales	28	Betulaceae	16	Alnus sp.	15	37	Angiosperm	1	Camp	1	Roberts, 1972	22	NULL	Cokedale (Livingston Group)	14	54.542	-78.6677	54.639	-80.8463	53.707	-83.6157	45.7049	-110.763	77.45	2.25	75	wet, successional	5	5. wet, successional	NULL
	Polypodiopsida	18	Schizaeales	71	Anemiaceae	2	Anemia sp.	18	44	Fern/Moss	2	Camp	1	Roberts, 1972	22	NULL	Cokedale (Livingston Group)	14	54.542	-78.6677	54.639	-80.8463	53.707	-83.6157	45.7049	-110.763	77.45	2.25	75	tropical lowland forest	6	6. tropical lowland forest	NULL
	Polypodiopsida	18	Schizaeales	71	uncertain	105	Appendicisporites sp.	21	55	Fern/Moss	2	Camp	1	Roberts, 1972	22	NULL	Cokedale (Livingston Group)	14	54.542	-78.6677	54.639	-80.8463	53.707	-83.6157	45.7049	-110.763	77.45	2.25	75	temperate lowland forest	2	2. temperate lowland forest	NULL
	Magnoliopsida	13	Santalales?	66	Santalaceae?	90	Aquilapollenites spp.	22	135	Angiosperm	1	Camp	1	Roberts, 1972	22	NULL	Cokedale (Livingston Group)	14	54.542	-78.6677	54.639	-80.8463	53.707	-83.6157	45.7049	-110.763	77.45	2.25	75	temperate lowland forest	2	2. temperate lowland forest	NULL
	Polypodiopsida	18	Schizaeales	71	Schizaeaceae	93	Cicatricosisporites sp.	58	273	Fern/Moss	2	Camp	1	Roberts, 1972	22	NULL	Cokedale (Livingston Group)	14	54.542	-78.6677	54.639	-80.8463	53.707	-83.6157	45.7049	-110.763	77.45	2.25	75	temperate lowland forest	2	2. temperate lowland forest	NULL
	Pinopsida	16	Pinales	54	Cheirolepidiaceae	25	Classopollis sp.	65	300	Gymnosperm	3	Camp	1	Roberts, 1972	22	NULL	Cokedale (Livingston Group)	14	54.542	-78.6677	54.639	-80.8463	53.707	-83.6157	45.7049	-110.763	77.45	2.25	75	temperate lowland forest	2	2. temperate lowland forest	NULL
	Magnoliopsida	13	Sapindales	67	Sapindaceae	91	Cupanieidites sp.	79	337	Angiosperm	1	Camp	1	Roberts, 1972	22	NULL	Cokedale (Livingston Group)	14	54.542	-78.6677	54.639	-80.8463	53.707	-83.6157	45.7049	-110.763	77.45	2.25	75	wet, successional	5	5. wet, successional	NULL
	Polypodiopsida	18	uncertain	80	uncertain	105	Deltoidospora sp.	86	368	Fern/Moss	2	Camp	1	Roberts, 1972	22	NULL	Cokedale (Livingston Group)	14	54.542	-78.6677	54.639	-80.8463	53.707	-83.6157	45.7049	-110.763	77.45	2.25	75	temperate lowland forest	2	2. temperate lowland forest	NULL
	uncertain	23	uncertain	80	uncertain	105	Engelhardtioidites sp.	101	395	Angiosperm	1	Camp	1	Roberts, 1972	22	NULL	Cokedale (Livingston Group)	14	54.542	-78.6677	54.639	-80.8463	53.707	-83.6157	45.7049	-110.763	77.45	2.25	75	wet, successional	5	5. wet, successional	NULL
	Gnetopsida	8	Ephedrales	21	Ephedraceae	38	Ephedra sp.	104	400	Gymnosperm	3	Camp	1	Roberts, 1972	22	NULL	Cokedale (Livingston Group)	14	54.542	-78.6677	54.639	-80.8463	53.707	-83.6157	45.7049	-110.763	77.45	2.25	75	open scrubland	8	8. open scrubland	NULL
	Magnoliopsida	13	Ericales	24	uncertain	105	Ericipites sp.	109	428	Angiosperm	1	Camp	1	Roberts, 1972	22	NULL	Cokedale (Livingston Group)	14	54.542	-78.6677	54.639	-80.8463	53.707	-83.6157	45.7049	-110.763	77.45	2.25	75	wet, successional	5	5. wet, successional	NULL
	Cycadopsida	5	Cycadales	18	uncertain	105	Eucommiidites sp.	110	433	Gymnosperm	3	Camp	1	Roberts, 1972	22	NULL	Cokedale (Livingston Group)	14	54.542	-78.6677	54.639	-80.8463	53.707	-83.6157	45.7049	-110.763	77.45	2.25	75	coastal plain	4	4. coastal plain	NULL
	Polypodiopsida	18	Gleicheniales	30	Gleicheniaceae	49	Gleicheniidites sp.	128	483	Fern/Moss	2	Camp	1	Roberts, 1972	22	NULL	Cokedale (Livingston Group)	14	54.542	-78.6677	54.639	-80.8463	53.707	-83.6157	45.7049	-110.763	77.45	2.25	75	swampy, lagoonal	3	3. swampy, lagoonal	NULL
	Lycopodiopsida	12	Lycopodiales	36	Lycopodiaceae	61	Hamulatisporis sp.	135	500	Fern/Moss	2	Camp	1	Roberts, 1972	22	NULL	Cokedale (Livingston Group)	14	54.542	-78.6677	54.639	-80.8463	53.707	-83.6157	45.7049	-110.763	77.45	2.25	75	temperate lowland forest	2	2. temperate lowland forest	NULL
	Polypodiopsida	18	Cyatheales	16	Cyatheaceae	31	Hemitelia sp.	141	509	Fern/Moss	2	Camp	1	Roberts, 1972	22	NULL	Cokedale (Livingston Group)	14	54.542	-78.6677	54.639	-80.8463	53.707	-83.6157	45.7049	-110.763	77.45	2.25	75	tropical lowland forest	6	6. tropical lowland forest	NULL
	Pinopsida	16	Pinales?	55	uncertain	105	Inaperturopollenites sp.	147	527	Gymnosperm	3	Camp	1	Roberts, 1972	22	NULL	Cokedale (Livingston Group)	14	54.542	-78.6677	54.639	-80.8463	53.707	-83.6157	45.7049	-110.763	77.45	2.25	75	temperate lowland forest	2	2. temperate lowland forest	NULL
	Polypodiopsida	18	uncertain	80	uncertain	105	Laevigatosporites sp.	158	569	Fern/Moss	2	Camp	1	Roberts, 1972	22	NULL	Cokedale (Livingston Group)	14	54.542	-78.6677	54.639	-80.8463	53.707	-83.6157	45.7049	-110.763	77.45	2.25	75	coastal plain	4	4. coastal plain	NULL
	uncertain	23	uncertain	80	uncertain	105	Monosulcites sp.	194	687	Angiosperm	1	Camp	1	Roberts, 1972	22	NULL	Cokedale (Livingston Group)	14	54.542	-78.6677	54.639	-80.8463	53.707	-83.6157	45.7049	-110.763	77.45	2.25	75	coastal plain	4	4. coastal plain	NULL
	Magnoliopsida	13	uncertain	80	uncertain	105	Polycolpites sp.	253	809	Angiosperm	1	Camp	1	Roberts, 1972	22	NULL	Cokedale (Livingston Group)	14	54.542	-78.6677	54.639	-80.8463	53.707	-83.6157	45.7049	-110.763	77.45	2.25	75	unknown	0	0. unknown	NULL
	Polypodiopsida	18	Polypodiales	59	uncertain	105	Polypodiisporites sp.	255	815	Fern/Moss	2	Camp	1	Roberts, 1972	22	NULL	Cokedale (Livingston Group)	14	54.542	-78.6677	54.639	-80.8463	53.707	-83.6157	45.7049	-110.763	77.45	2.25	75	temperate lowland forest	2	2. temperate lowland forest	NULL
	Magnoliopsida	13	Proteales	61	uncertain	105	Proteacidites spp.	262	833	Angiosperm	1	Camp	1	Roberts, 1972	22	NULL	Cokedale (Livingston Group)	14	54.542	-78.6677	54.639	-80.8463	53.707	-83.6157	45.7049	-110.763	77.45	2.25	75	unknown	0	0. unknown	NULL
	Bryopsida	3	uncertain	80	uncertain	105	Stereisporites sp.	329	992	Fern/Moss	2	Camp	1	Roberts, 1972	22	NULL	Cokedale (Livingston Group)	14	54.542	-78.6677	54.639	-80.8463	53.707	-83.6157	45.7049	-110.763	77.45	2.25	75	coastal plain	4	4. coastal plain	NULL
	Magnoliopsida	13	Proteales	61	uncertain	105	Triatriopollenites sp.	357	1046	Angiosperm	1	Camp	1	Roberts, 1972	22	NULL	Cokedale (Livingston Group)	14	54.542	-78.6677	54.639	-80.8463	53.707	-83.6157	45.7049	-110.763	77.45	2.25	75	temperate lowland forest	2	2. temperate lowland forest	NULL
	uncertain	23	uncertain	80	uncertain	105	Tricolpopollenites sp.	359	1092	Angiosperm	1	Camp	1	Roberts, 1972	22	NULL	Cokedale (Livingston Group)	14	54.542	-78.6677	54.639	-80.8463	53.707	-83.6157	45.7049	-110.763	77.45	2.25	75	coastal plain	4	4. coastal plain	NULL
	uncertain	23	uncertain	80	uncertain	105	Tricolpopollenites spp.	359	1093	Angiosperm	1	Camp	1	Roberts, 1972	22	NULL	Cokedale (Livingston Group)	14	54.542	-78.6677	54.639	-80.8463	53.707	-83.6157	45.7049	-110.763	77.45	2.25	75	coastal plain	4	4. coastal plain	NULL
	Magnoliopsida	13	Magnoliales?	39	uncertain	105	Tricolporites spp.	361	1102	Angiosperm	1	Camp	1	Roberts, 1972	22	NULL	Cokedale (Livingston Group)	14	54.542	-78.6677	54.639	-80.8463	53.707	-83.6157	45.7049	-110.763	77.45	2.25	75	temperate lowland forest	2	2. temperate lowland forest	NULL
	uncertain	23	uncertain	80	uncertain	105	Trivestibulopollenites	373	1145	Angiosperm	1	Camp	1	Roberts, 1972	22	NULL	Cokedale (Livingston Group)	14	54.542	-78.6677	54.639	-80.8463	53.707	-83.6157	45.7049	-110.763	77.45	2.25	75	temperate lowland forest	2	2. temperate lowland forest	NULL
	Magnoliopsida	13	Rosales	63	Ulmaceae	102	Ulmipollenites sp.	380	1162	Angiosperm	1	Camp	1	Roberts, 1972	22	NULL	Cokedale (Livingston Group)	14	54.542	-78.6677	54.639	-80.8463	53.707	-83.6157	45.7049	-110.763	77.45	2.25	75	temperate lowland forest	2	2. temperate lowland forest	NULL
	Polypodiopsida	18	Polypodiales	59	Polypodiaceae	81	Verrucosisporites sp.	386	1177	Fern/Moss	2	Camp	1	Roberts, 1972	22	NULL	Cokedale (Livingston Group)	14	54.542	-78.6677	54.639	-80.8463	53.707	-83.6157	45.7049	-110.763	77.45	2.25	75	tropical lowland forest	6	6. tropical lowland forest	NULL
	Pteridospermatopsida?	21	Caytoniales?	11	Caytoniaceae?	22	Vitreisporites sp.	393	1187	Gymnosperm	3	Camp	1	Roberts, 1972	22	NULL	Cokedale (Livingston Group)	14	54.542	-78.6677	54.639	-80.8463	53.707	-83.6157	45.7049	-110.763	77.45	2.25	75	temperate lowland forest	2	2. temperate lowland forest	NULL
	Pinopsida	16	Pinales?	55	Pinaceae?	77	Abietineaepollenites sp.	2	4	Gymnosperm	3	Camp	1	Roberts, 1972	22	NULL	Miner Creek (Livingston Group)	33	54.5725	-78.6265	54.6698	-80.8057	53.7381	-83.5768	45.7412	-110.743	71.15	5.15	70	upland forest	1	1. upland forest	NULL
	uncertain	23	uncertain	80	uncertain	105	Aequitriradites sp.	9	20	Fern/Moss	2	Camp	1	Roberts, 1972	22	NULL	Miner Creek (Livingston Group)	33	54.5725	-78.6265	54.6698	-80.8057	53.7381	-83.5768	45.7412	-110.743	71.15	5.15	70	coastal plain	4	4. coastal plain	NULL
	Magnoliopsida	13	Santalales?	66	Santalaceae?	90	Aquilapollenites spp.	22	135	Angiosperm	1	Camp	1	Roberts, 1972	22	NULL	Miner Creek (Livingston Group)	33	54.5725	-78.6265	54.6698	-80.8057	53.7381	-83.5768	45.7412	-110.743	71.15	5.15	70	temperate lowland forest	2	2. temperate lowland forest	NULL
	Polypodiopsida	18	uncertain	80	uncertain	105	Baculatisporites sp.	30	184	Fern/Moss	2	Camp	1	Roberts, 1972	22	NULL	Miner Creek (Livingston Group)	33	54.5725	-78.6265	54.6698	-80.8057	53.7381	-83.5768	45.7412	-110.743	71.15	5.15	70	coastal plain	4	4. coastal plain	NULL
	Polypodiopsida	18	Schizaeales	71	Schizaeaceae	93	Cicatricosisporites sp.	58	273	Fern/Moss	2	Camp	1	Roberts, 1972	22	NULL	Miner Creek (Livingston Group)	33	54.5725	-78.6265	54.6698	-80.8057	53.7381	-83.5768	45.7412	-110.743	71.15	5.15	70	temperate lowland forest	2	2. temperate lowland forest	NULL
	Pinopsida	16	Pinales	54	Cheirolepidiaceae	25	Classopollis sp.	65	300	Gymnosperm	3	Camp	1	Roberts, 1972	22	NULL	Miner Creek (Livingston Group)	33	54.5725	-78.6265	54.6698	-80.8057	53.7381	-83.5768	45.7412	-110.743	71.15	5.15	70	temperate lowland forest	2	2. temperate lowland forest	NULL
	Polypodiopsida	18	uncertain	80	uncertain	105	Deltoidospora sp.	86	368	Fern/Moss	2	Camp	1	Roberts, 1972	22	NULL	Miner Creek (Livingston Group)	33	54.5725	-78.6265	54.6698	-80.8057	53.7381	-83.5768	45.7412	-110.743	71.15	5.15	70	temperate lowland forest	2	2. temperate lowland forest	NULL
	Gnetopsida	8	Ephedrales	21	Ephedraceae	38	Ephedra sp.	104	400	Gymnosperm	3	Camp	1	Roberts, 1972	22	NULL	Miner Creek (Livingston Group)	33	54.5725	-78.6265	54.6698	-80.8057	53.7381	-83.5768	45.7412	-110.743	71.15	5.15	70	open scrubland	8	8. open scrubland	NULL
	Cycadopsida	5	Cycadales	18	uncertain	105	Eucommiidites sp.	110	433	Gymnosperm	3	Camp	1	Roberts, 1972	22	NULL	Miner Creek (Livingston Group)	33	54.5725	-78.6265	54.6698	-80.8057	53.7381	-83.5768	45.7412	-110.743	71.15	5.15	70	coastal plain	4	4. coastal plain	NULL
	Polypodiopsida	18	uncertain	80	uncertain	105	Ghoshispora sp.	126	474	Fern/Moss	2	Camp	1	Roberts, 1972	22	NULL	Miner Creek (Livingston Group)	33	54.5725	-78.6265	54.6698	-80.8057	53.7381	-83.5768	45.7412	-110.743	71.15	5.15	70	swampy, lagoonal	3	3. swampy, lagoonal	NULL
	Polypodiopsida	18	Gleicheniales	30	Gleicheniaceae	49	Gleicheniidites sp.	128	483	Fern/Moss	2	Camp	1	Roberts, 1972	22	NULL	Miner Creek (Livingston Group)	33	54.5725	-78.6265	54.6698	-80.8057	53.7381	-83.5768	45.7412	-110.743	71.15	5.15	70	swampy, lagoonal	3	3. swampy, lagoonal	NULL
	Pinopsida	16	Pinales?	55	uncertain	105	Inaperturopollenites sp.	147	527	Gymnosperm	3	Camp	1	Roberts, 1972	22	NULL	Miner Creek (Livingston Group)	33	54.5725	-78.6265	54.6698	-80.8057	53.7381	-83.5768	45.7412	-110.743	71.15	5.15	70	temperate lowland forest	2	2. temperate lowland forest	NULL
	Magnoliopsida	13	Fagales	28	uncertain	105	Kurtzipites sp.	156	553	Angiosperm	1	Camp	1	Roberts, 1972	22	NULL	Miner Creek (Livingston Group)	33	54.5725	-78.6265	54.6698	-80.8057	53.7381	-83.5768	45.7412	-110.743	71.15	5.15	70	temperate lowland forest	2	2. temperate lowland forest	NULL
	Polypodiopsida	18	uncertain	80	uncertain	105	Laevigatosporites sp.	158	569	Fern/Moss	2	Camp	1	Roberts, 1972	22	NULL	Miner Creek (Livingston Group)	33	54.5725	-78.6265	54.6698	-80.8057	53.7381	-83.5768	45.7412	-110.743	71.15	5.15	70	coastal plain	4	4. coastal plain	NULL
	Lycopodiopsida	12	Lycopodiales	36	Lycopodiaceae	61	Lycopodiumsporites sp.	175	621	Fern/Moss	2	Camp	1	Roberts, 1972	22	NULL	Miner Creek (Livingston Group)	33	54.5725	-78.6265	54.6698	-80.8057	53.7381	-83.5768	45.7412	-110.743	71.15	5.15	70	upland forest	1	1. upland forest	NULL
	Polypodiopsida	18	uncertain	80	uncertain	105	Microreticulatisporites sp.	187	661	Fern/Moss	2	Camp	1	Roberts, 1972	22	NULL	Miner Creek (Livingston Group)	33	54.5725	-78.6265	54.6698	-80.8057	53.7381	-83.5768	45.7412	-110.743	71.15	5.15	70	wet, successional	5	5. wet, successional	NULL
	Magnoliopsida	13	Rosales	63	Rhamnaceae	85	Paliurus sp.	219	728	Angiosperm	1	Camp	1	Roberts, 1972	22	NULL	Miner Creek (Livingston Group)	33	54.5725	-78.6265	54.6698	-80.8057	53.7381	-83.5768	45.7412	-110.743	71.15	5.15	70	coastal plain	4	4. coastal plain	NULL
	Magnoliopsida	13	Proteales	61	uncertain	105	Proteacidites spp.	262	833	Angiosperm	1	Camp	1	Roberts, 1972	22	NULL	Miner Creek (Livingston Group)	33	54.5725	-78.6265	54.6698	-80.8057	53.7381	-83.5768	45.7412	-110.743	71.15	5.15	70	unknown	0	0. unknown	NULL
	Bryopsida	3	uncertain	80	uncertain	105	Stereisporites sp.	329	992	Fern/Moss	2	Camp	1	Roberts, 1972	22	NULL	Miner Creek (Livingston Group)	33	54.5725	-78.6265	54.6698	-80.8057	53.7381	-83.5768	45.7412	-110.743	71.15	5.15	70	coastal plain	4	4. coastal plain	NULL
	uncertain	23	uncertain	80	uncertain	105	Tricolpopollenites sp.	359	1092	Angiosperm	1	Camp	1	Roberts, 1972	22	NULL	Miner Creek (Livingston Group)	33	54.5725	-78.6265	54.6698	-80.8057	53.7381	-83.5768	45.7412	-110.743	71.15	5.15	70	coastal plain	4	4. coastal plain	NULL
	uncertain	23	uncertain	80	uncertain	105	Tricolpopollenites spp.	359	1093	Angiosperm	1	Camp	1	Roberts, 1972	22	NULL	Miner Creek (Livingston Group)	33	54.5725	-78.6265	54.6698	-80.8057	53.7381	-83.5768	45.7412	-110.743	71.15	5.15	70	coastal plain	4	4. coastal plain	NULL
	Magnoliopsida	13	Magnoliales?	39	uncertain	105	Tricolporites spp.	361	1102	Angiosperm	1	Camp	1	Roberts, 1972	22	NULL	Miner Creek (Livingston Group)	33	54.5725	-78.6265	54.6698	-80.8057	53.7381	-83.5768	45.7412	-110.743	71.15	5.15	70	temperate lowland forest	2	2. temperate lowland forest	NULL
	Polypodiopsida	18	uncertain	80	uncertain	105	Triplanosporites sp.	368	1122	Fern/Moss	2	Camp	1	Roberts, 1972	22	NULL	Miner Creek (Livingston Group)	33	54.5725	-78.6265	54.6698	-80.8057	53.7381	-83.5768	45.7412	-110.743	71.15	5.15	70	tropical lowland forest	6	6. tropical lowland forest	NULL
	Polypodiopsida	18	Polypodiales	59	Polypodiaceae	81	Verrucosisporites sp.	386	1177	Fern/Moss	2	Camp	1	Roberts, 1972	22	NULL	Miner Creek (Livingston Group)	33	54.5725	-78.6265	54.6698	-80.8057	53.7381	-83.5768	45.7412	-110.743	71.15	5.15	70	tropical lowland forest	6	6. tropical lowland forest	NULL
	Polypodiopsida	18	Schizaeales	71	uncertain	105	Appendicisporites sp.	21	55	Fern/Moss	2	Camp	1	Skip and McGrew, 1977	9999	NULL	Maudlow/Sedan	9999	54.9855	-78.8481	55.081	-81.0377	54.1474	-83.8135	46.0959	-111.099	78.9	2	80	temperate lowland forest	2	2. temperate lowland forest	NULL
	Pinopsida	16	Pinales	54	Araucariaceae	10	Araucariacites sp.	24	149	Gymnosperm	3	Camp	1	Skip and McGrew, 1977	9999	NULL	Maudlow/Sedan	9999	54.9855	-78.8481	55.081	-81.0377	54.1474	-83.8135	46.0959	-111.099	78.9	2	80	coastal plain	4	4. coastal plain	NULL
	Pinopsida	16	Pinales	54	uncertain	105	Callialasporites sp.	42	214	Gymnosperm	3	Camp	1	Skip and McGrew, 1977	9999	NULL	Maudlow/Sedan	9999	54.9855	-78.8481	55.081	-81.0377	54.1474	-83.8135	46.0959	-111.099	78.9	2	80	upland forest	1	1. upland forest	NULL
	Magnoliopsida	13	Fagales?	29	Juglandaceae?	56	Complexiopollis sp.	68	304	Angiosperm	1	Camp	1	Skip and McGrew, 1977	9999	NULL	Maudlow/Sedan	9999	54.9855	-78.8481	55.081	-81.0377	54.1474	-83.8135	46.0959	-111.099	78.9	2	80	swampy, lagoonal	3	3. swampy, lagoonal	NULL
	Cycadopsida	5	Cycadales	18	uncertain	105	Eucommiidites sp.	110	433	Gymnosperm	3	Camp	1	Skip and McGrew, 1977	9999	NULL	Maudlow/Sedan	9999	54.9855	-78.8481	55.081	-81.0377	54.1474	-83.8135	46.0959	-111.099	78.9	2	80	coastal plain	4	4. coastal plain	NULL
	Polypodiopsida	18	Gleicheniales	30	Gleicheniaceae	49	Gleicheniidites sp.	128	483	Fern/Moss	2	Camp	1	Skip and McGrew, 1977	9999	NULL	Maudlow/Sedan	9999	54.9855	-78.8481	55.081	-81.0377	54.1474	-83.8135	46.0959	-111.099	78.9	2	80	swampy, lagoonal	3	3. swampy, lagoonal	NULL
	Polypodiopsida	18	Schizaeales	71	Schizaeaceae	93	Klukisporites sp.	155	546	Fern/Moss	2	Camp	1	Skip and McGrew, 1977	9999	NULL	Maudlow/Sedan	9999	54.9855	-78.8481	55.081	-81.0377	54.1474	-83.8135	46.0959	-111.099	78.9	2	80	tropical lowland forest	6	6. tropical lowland forest	NULL
	Magnoliopsida	13	Fagales?	29	Juglandaceae?	56	Minorpollis sp.	188	664	Angiosperm	1	Camp	1	Skip and McGrew, 1977	9999	NULL	Maudlow/Sedan	9999	54.9855	-78.8481	55.081	-81.0377	54.1474	-83.8135	46.0959	-111.099	78.9	2	80	upland forest	1	1. upland forest	NULL
	Magnoliopsida	13	Proteales	61	uncertain	105	Proteacidites spp.	262	833	Angiosperm	1	Camp	1	Skip and McGrew, 1977	9999	NULL	Maudlow/Sedan	9999	54.9855	-78.8481	55.081	-81.0377	54.1474	-83.8135	46.0959	-111.099	78.9	2	80	unknown	0	0. unknown	NULL
	Pinopsida	16	uncertain	80	uncertain	105	Rugubivesiculites sp.	297	915	Gymnosperm	3	Camp	1	Skip and McGrew, 1977	9999	NULL	Maudlow/Sedan	9999	54.9855	-78.8481	55.081	-81.0377	54.1474	-83.8135	46.0959	-111.099	78.9	2	80	coastal plain	4	4. coastal plain	NULL
	Polypodiopsida	18	Schizaeales	71	Schizaeaceae	93	Schizaea sp.	307	935	Fern/Moss	2	Camp	1	Skip and McGrew, 1977	9999	NULL	Maudlow/Sedan	9999	54.9855	-78.8481	55.081	-81.0377	54.1474	-83.8135	46.0959	-111.099	78.9	2	80	tropical lowland forest	6	6. tropical lowland forest	NULL
	Pinopsida	16	Pinales	54	Cupressaceae?	30	Taxodiaceaepollenites sp.	343	1016	Gymnosperm	3	Camp	1	Skip and McGrew, 1977	9999	NULL	Maudlow/Sedan	9999	54.9855	-78.8481	55.081	-81.0377	54.1474	-83.8135	46.0959	-111.099	78.9	2	80	temperate lowland forest	2	2. temperate lowland forest	NULL
	Marchantiopsida	15	uncertain	80	uncertain	105	Zlivisporis sp.	397	1203	Fern/Moss	2	Camp	1	Skip and McGrew, 1977	9999	NULL	Maudlow/Sedan	9999	54.9855	-78.8481	55.081	-81.0377	54.1474	-83.8135	46.0959	-111.099	78.9	2	80	swampy, lagoonal	3	3. swampy, lagoonal	NULL
	Magnoliopsida	13	Santalales?	66	Santalaceae?	90	Aquilapollenites catenireticulatus	22	75	Angiosperm	1	Camp	1	Srivastava and Braman, 2013	24	NULL	Horseshoe Canyon	27	60.2419	-77.1935	60.3499	-79.5247	59.4283	-82.4905	51.3554	-112.412	72.7	0.6	75	temperate lowland forest	2	2. temperate lowland forest	East Coulee site, Horseshoe Canyon Fm., 72.7 ± 0.6
	Magnoliopsida	13	Santalales?	66	Santalaceae?	90	Aquilapollenites debilis	22	88	Angiosperm	1	Camp	1	Srivastava and Braman, 2013	24	NULL	Horseshoe Canyon	27	60.2419	-77.1935	60.3499	-79.5247	59.4283	-82.4905	51.3554	-112.412	72.7	0.6	75	temperate lowland forest	2	2. temperate lowland forest	East Coulee site, Horseshoe Canyon Fm., 72.7 ± 0.6
	Magnoliopsida	13	Santalales?	66	Santalaceae?	90	Aquilapollenites leucocephalus	22	103	Angiosperm	1	Camp	1	Srivastava and Braman, 2013	24	NULL	Horseshoe Canyon	27	60.2419	-77.1935	60.3499	-79.5247	59.4283	-82.4905	51.3554	-112.412	72.7	0.6	75	temperate lowland forest	2	2. temperate lowland forest	East Coulee site, Horseshoe Canyon Fm., 72.7 ± 0.6
	Magnoliopsida	13	Santalales?	66	Santalaceae?	90	Aquilapollenites quadrilobus	22	124	Angiosperm	1	Camp	1	Srivastava and Braman, 2013	24	NULL	Horseshoe Canyon	27	60.2419	-77.1935	60.3499	-79.5247	59.4283	-82.4905	51.3554	-112.412	72.7	0.6	75	temperate lowland forest	2	2. temperate lowland forest	East Coulee site, Horseshoe Canyon Fm., 72.7 ± 0.6
	Magnoliopsida	13	Santalales?	66	Santalaceae?	90	Aquilapollenites stelckii	22	136	Angiosperm	1	Camp	1	Srivastava and Braman, 2013	24	NULL	Horseshoe Canyon	27	60.2419	-77.1935	60.3499	-79.5247	59.4283	-82.4905	51.3554	-112.412	72.7	0.6	75	temperate lowland forest	2	2. temperate lowland forest	East Coulee site, Horseshoe Canyon Fm., 72.7 ± 0.6
	Magnoliopsida	13	Santalales?	66	Santalaceae?	90	Aquilapollenites venustus	22	144	Angiosperm	1	Camp	1	Srivastava and Braman, 2013	24	NULL	Horseshoe Canyon	27	60.2419	-77.1935	60.3499	-79.5247	59.4283	-82.4905	51.3554	-112.412	72.7	0.6	75	temperate lowland forest	2	2. temperate lowland forest	East Coulee site, Horseshoe Canyon Fm., 72.7 ± 0.6
	Lycopodiopsida	12	Selaginellales	73	Selaginellaceae	95	Ceratosporites couliensis	52	240	Fern/Moss	2	Camp	1	Srivastava and Braman, 2013	24	NULL	Horseshoe Canyon	27	60.2419	-77.1935	60.3499	-79.5247	59.4283	-82.4905	51.3554	-112.412	72.7	0.6	75	tropical lowland forest	6	6. tropical lowland forest	East Coulee site, Horseshoe Canyon Fm., 72.7 ± 0.6
	Polypodiopsida	18	Schizaeales	71	Schizaeaceae	93	Cicatricosisporites ornatus	58	270	Fern/Moss	2	Camp	1	Srivastava and Braman, 2013	24	NULL	Horseshoe Canyon	27	60.2419	-77.1935	60.3499	-79.5247	59.4283	-82.4905	51.3554	-112.412	72.7	0.6	75	temperate lowland forest	2	2. temperate lowland forest	East Coulee site, Horseshoe Canyon Fm., 72.7 ± 0.6
	Polypodiopsida	18	uncertain	80	uncertain	105	Hazaria canadiana	138	504	Fern/Moss	2	Camp	1	Srivastava and Braman, 2013	24	NULL	Horseshoe Canyon	27	60.2419	-77.1935	60.3499	-79.5247	59.4283	-82.4905	51.3554	-112.412	72.7	0.6	75	unknown	0	0. unknown	East Coulee site, Horseshoe Canyon Fm., 72.7 ± 0.6
	Polypodiopsida	18	uncertain	80	uncertain	105	Laevigatosporites druggii	158	563	Fern/Moss	2	Camp	1	Srivastava and Braman, 2013	24	NULL	Horseshoe Canyon	27	60.2419	-77.1935	60.3499	-79.5247	59.4283	-82.4905	51.3554	-112.412	72.7	0.6	75	coastal plain	4	4. coastal plain	East Coulee site, Horseshoe Canyon Fm., 72.7 ± 0.6
	Magnoliopsida	13	Santalales	65	Loranthaceae	59	Loranthacites catteralli	171	603	Angiosperm	1	Camp	1	Srivastava and Braman, 2013	24	NULL	Horseshoe Canyon	27	60.2419	-77.1935	60.3499	-79.5247	59.4283	-82.4905	51.3554	-112.412	72.7	0.6	75	tropical lowland forest	6	6. tropical lowland forest	East Coulee site, Horseshoe Canyon Fm., 72.7 ± 0.6
	Lycopodiopsida	12	Selaginellales	73	Selaginellaceae	95	Neoraistrickia speciosa	204	701	Fern/Moss	2	Camp	1	Srivastava and Braman, 2013	24	NULL	Horseshoe Canyon	27	60.2419	-77.1935	60.3499	-79.5247	59.4283	-82.4905	51.3554	-112.412	72.7	0.6	75	tropical lowland forest	6	6. tropical lowland forest	East Coulee site, Horseshoe Canyon Fm., 72.7 ± 0.6
	Magnoliopsida	13	Cornales?	14	Nyssaceae?	71	Nyssoidites edmontonensis	211	714	Angiosperm	1	Camp	1	Srivastava and Braman, 2013	24	NULL	Horseshoe Canyon	27	60.2419	-77.1935	60.3499	-79.5247	59.4283	-82.4905	51.3554	-112.412	72.7	0.6	75	wet, successional	5	5. wet, successional	East Coulee site, Horseshoe Canyon Fm., 72.7 ± 0.6
	Polypodiopsida	18	Polypodiales	59	uncertain	105	Polypodiisporites amplus	255	812	Fern/Moss	2	Camp	1	Srivastava and Braman, 2013	24	NULL	Horseshoe Canyon	27	60.2419	-77.1935	60.3499	-79.5247	59.4283	-82.4905	51.3554	-112.412	72.7	0.6	75	temperate lowland forest	2	2. temperate lowland forest	East Coulee site, Horseshoe Canyon Fm., 72.7 ± 0.6
	Magnoliopsida	13	Caryophyllales?	10	uncertain	105	Polyporina cribraria	257	817	Angiosperm	1	Camp	1	Srivastava and Braman, 2013	24	NULL	Horseshoe Canyon	27	60.2419	-77.1935	60.3499	-79.5247	59.4283	-82.4905	51.3554	-112.412	72.7	0.6	75	temperate lowland forest	2	2. temperate lowland forest	East Coulee site, Horseshoe Canyon Fm., 72.7 ± 0.6
	Lycopodiopsida	12	Lycopodiales	36	Lycopodiaceae	61	Retitriletes coulianus	291	889	Fern/Moss	2	Camp	1	Srivastava and Braman, 2013	24	NULL	Horseshoe Canyon	27	60.2419	-77.1935	60.3499	-79.5247	59.4283	-82.4905	51.3554	-112.412	72.7	0.6	75	upland forest	1	1. upland forest	East Coulee site, Horseshoe Canyon Fm., 72.7 ± 0.6
	Magnoliopsida	13	Piperales	56	Aristolochiaceae	13	Rosannia manika	294	908	Angiosperm	1	Camp	1	Srivastava and Braman, 2013	24	NULL	Horseshoe Canyon	27	60.2419	-77.1935	60.3499	-79.5247	59.4283	-82.4905	51.3554	-112.412	72.7	0.6	75	upland forest	1	1. upland forest	East Coulee site, Horseshoe Canyon Fm., 72.7 ± 0.6
	Magnoliopsida	13	uncertain	80	uncertain	105	Scabrastephanocolpites albertensis	306	929	Angiosperm	1	Camp	1	Srivastava and Braman, 2013	24	NULL	Horseshoe Canyon	27	60.2419	-77.1935	60.3499	-79.5247	59.4283	-82.4905	51.3554	-112.412	72.7	0.6	75	coastal plain	4	4. coastal plain	East Coulee site, Horseshoe Canyon Fm., 72.7 ± 0.6
	Magnoliopsida	13	uncertain	80	uncertain	105	Senipites drumhellerensis	311	945	Angiosperm	1	Camp	1	Srivastava and Braman, 2013	24	NULL	Horseshoe Canyon	27	60.2419	-77.1935	60.3499	-79.5247	59.4283	-82.4905	51.3554	-112.412	72.7	0.6	75	coastal plain	4	4. coastal plain	East Coulee site, Horseshoe Canyon Fm., 72.7 ± 0.6
	Magnoliopsida?	14	Fagales?	29	Betulaceae?	19	Alnipollenites quadrapollenites	14	32	Angiosperm	1	Camp	1	Stone, 1971	27	NULL	Almond	2	50.3822	-79.5341	50.4617	-81.473	49.5133	-83.9592	41.7005	-108.702	72.75	0.85	75	wet, successional	5	5. wet, successional	NULL
	Polypodiopsida	18	Cyatheales	16	Cyatheaceae	31	Alsophilidites kerguelensis	16	39	Fern/Moss	2	Camp	1	Stone, 1971	27	NULL	Almond	2	50.3822	-79.5341	50.4617	-81.473	49.5133	-83.9592	41.7005	-108.702	72.75	0.85	75	tropical lowland forest	6	6. tropical lowland forest	NULL
	Polypodiopsida	18	Schizaeales	71	uncertain	105	Appendicisporites cf. A. dentimarginatus	21	49	Fern/Moss	2	Camp	1	Stone, 1971	27	NULL	Almond	2	50.3822	-79.5341	50.4617	-81.473	49.5133	-83.9592	41.7005	-108.702	72.75	0.85	75	temperate lowland forest	2	2. temperate lowland forest	NULL
	Magnoliopsida	13	Santalales?	66	Santalaceae?	90	Aquilapollenites polaris	22	115	Angiosperm	1	Camp	1	Stone, 1971	27	NULL	Almond	2	50.3822	-79.5341	50.4617	-81.473	49.5133	-83.9592	41.7005	-108.702	72.75	0.85	75	temperate lowland forest	2	2. temperate lowland forest	NULL
	Magnoliopsida	13	Santalales?	66	Santalaceae?	90	Aquilapollenites pulcher	22	119	Angiosperm	1	Camp	1	Stone, 1971	27	NULL	Almond	2	50.3822	-79.5341	50.4617	-81.473	49.5133	-83.9592	41.7005	-108.702	72.75	0.85	75	temperate lowland forest	2	2. temperate lowland forest	NULL
	Magnoliopsida	13	Santalales?	66	Santalaceae?	90	Aquilapollenites reticulatus	22	127	Angiosperm	1	Camp	1	Stone, 1971	27	NULL	Almond	2	50.3822	-79.5341	50.4617	-81.473	49.5133	-83.9592	41.7005	-108.702	72.75	0.85	75	temperate lowland forest	2	2. temperate lowland forest	NULL
	Magnoliopsida	13	Santalales?	66	Santalaceae?	90	Aquilapollenites striatus	22	138	Angiosperm	1	Camp	1	Stone, 1971	27	NULL	Almond	2	50.3822	-79.5341	50.4617	-81.473	49.5133	-83.9592	41.7005	-108.702	72.75	0.85	75	temperate lowland forest	2	2. temperate lowland forest	NULL
	Pinopsida	16	Pinales	54	Araucariaceae	10	Araucariacites limbatus	24	148	Gymnosperm	3	Camp	1	Stone, 1971	27	NULL	Almond	2	50.3822	-79.5341	50.4617	-81.473	49.5133	-83.9592	41.7005	-108.702	72.75	0.85	75	coastal plain	4	4. coastal plain	NULL
	Liliopsida	10	Arecales	6	uncertain	105	Arecipites reticulatus	25	154	Angiosperm	1	Camp	1	Stone, 1971	27	NULL	Almond	2	50.3822	-79.5341	50.4617	-81.473	49.5133	-83.9592	41.7005	-108.702	72.75	0.85	75	swampy, lagoonal	3	3. swampy, lagoonal	NULL
	Polypodiopsida	18	Salviniales	64	Salviniaceae	88	Azolla sp.	27	173	Fern/Moss	2	Camp	1	Stone, 1971	27	NULL	Almond	2	50.3822	-79.5341	50.4617	-81.473	49.5133	-83.9592	41.7005	-108.702	72.75	0.85	75	estuarine, aquatic	7	7. estuarine, aquatic	NULL
	Polypodiopsida	18	Schizaeales	71	Schizaeaceae	93	Cicatricosisporites doragensis	58	261	Fern/Moss	2	Camp	1	Stone, 1971	27	NULL	Almond	2	50.3822	-79.5341	50.4617	-81.473	49.5133	-83.9592	41.7005	-108.702	72.75	0.85	75	temperate lowland forest	2	2. temperate lowland forest	NULL
	Anthocerotopsida	1	Anthocerotales?	2	Anthocerotaceae?	4	Cingulatisporites dakotaensis	59	280	Fern/Moss	2	Camp	1	Stone, 1971	27	NULL	Almond	2	50.3822	-79.5341	50.4617	-81.473	49.5133	-83.9592	41.7005	-108.702	72.75	0.85	75	coastal plain	4	4. coastal plain	NULL
	Pinopsida	16	Pinales	54	Cheirolepidiaceae	25	Classopollis classoides	65	297	Gymnosperm	3	Camp	1	Stone, 1971	27	NULL	Almond	2	50.3822	-79.5341	50.4617	-81.473	49.5133	-83.9592	41.7005	-108.702	72.75	0.85	75	temperate lowland forest	2	2. temperate lowland forest	NULL
	Polypodiopsida?	19	uncertain	80	uncertain	105	Conbaculatisporites sp.	69	305	Fern/Moss	2	Camp	1	Stone, 1971	27	NULL	Almond	2	50.3822	-79.5341	50.4617	-81.473	49.5133	-83.9592	41.7005	-108.702	72.75	0.85	75	unknown	0	0. unknown	NULL
	uncertain	23	uncertain	80	uncertain	105	Conclavipollis wolfcreekensis	72	315	Angiosperm	1	Camp	1	Stone, 1971	27	NULL	Almond	2	50.3822	-79.5341	50.4617	-81.473	49.5133	-83.9592	41.7005	-108.702	72.75	0.85	75	coastal plain	4	4. coastal plain	NULL
	Magnoliopsida	13	Santalales?	66	Loranthaceae?	60	Cranwellia rumseyensis	78	326	Angiosperm	1	Camp	1	Stone, 1971	27	NULL	Almond	2	50.3822	-79.5341	50.4617	-81.473	49.5133	-83.9592	41.7005	-108.702	72.75	0.85	75	temperate lowland forest	2	2. temperate lowland forest	NULL
	Magnoliopsida	13	Sapindales	67	Sapindaceae	91	Cupanieidites major	79	334	Angiosperm	1	Camp	1	Stone, 1971	27	NULL	Almond	2	50.3822	-79.5341	50.4617	-81.473	49.5133	-83.9592	41.7005	-108.702	72.75	0.85	75	wet, successional	5	5. wet, successional	NULL
	Magnoliopsida	13	Fagales	28	Fagaceae	47	Cupuliferoipollenites pusillus	81	343	Angiosperm	1	Camp	1	Stone, 1971	27	NULL	Almond	2	50.3822	-79.5341	50.4617	-81.473	49.5133	-83.9592	41.7005	-108.702	72.75	0.85	75	swampy, lagoonal	3	3. swampy, lagoonal	NULL
	Cycadopsida	5	Cycadales?	19	uncertain	105	Cycadopites follicularis	84	357	Gymnosperm	3	Camp	1	Stone, 1971	27	NULL	Almond	2	50.3822	-79.5341	50.4617	-81.473	49.5133	-83.9592	41.7005	-108.702	72.75	0.85	75	tropical lowland forest	6	6. tropical lowland forest	NULL
	Cycadopsida	5	Cycadales?	19	uncertain	105	Cycadopites sp.	84	361	Gymnosperm	3	Camp	1	Stone, 1971	27	NULL	Almond	2	50.3822	-79.5341	50.4617	-81.473	49.5133	-83.9592	41.7005	-108.702	72.75	0.85	75	tropical lowland forest	6	6. tropical lowland forest	NULL
	Polypodiopsida	18	uncertain	80	uncertain	105	Deltoidospora diaphana	86	365	Fern/Moss	2	Camp	1	Stone, 1971	27	NULL	Almond	2	50.3822	-79.5341	50.4617	-81.473	49.5133	-83.9592	41.7005	-108.702	72.75	0.85	75	temperate lowland forest	2	2. temperate lowland forest	NULL
	uncertain	23	uncertain	80	uncertain	105	Engelhardtioidites minutus	101	394	Angiosperm	1	Camp	1	Stone, 1971	27	NULL	Almond	2	50.3822	-79.5341	50.4617	-81.473	49.5133	-83.9592	41.7005	-108.702	72.75	0.85	75	wet, successional	5	5. wet, successional	NULL
	Polypodiopsida	18	Equisetales	22	Equisetaceae	39	Equisetosporites ovatus	106	415	Fern/Moss	2	Camp	1	Stone, 1971	27	NULL	Almond	2	50.3822	-79.5341	50.4617	-81.473	49.5133	-83.9592	41.7005	-108.702	72.75	0.85	75	open scrubland	8	8. open scrubland	NULL
	Magnoliopsida	13	Buxales	8	Buxaceae	20	Erdtmanipollis pachysandroides	107	422	Angiosperm	1	Camp	1	Stone, 1971	27	NULL	Almond	2	50.3822	-79.5341	50.4617	-81.473	49.5133	-83.9592	41.7005	-108.702	72.75	0.85	75	temperate lowland forest	2	2. temperate lowland forest	NULL
	Magnoliopsida	13	Ericales?	25	Ericaceae?	42	Ericaceoipollenites rallus	108	425	Angiosperm	1	Camp	1	Stone, 1971	27	NULL	Almond	2	50.3822	-79.5341	50.4617	-81.473	49.5133	-83.9592	41.7005	-108.702	72.75	0.85	75	wet, successional	5	5. wet, successional	NULL
	Cycadopsida	5	Cycadales	18	uncertain	105	Eucommiidites couperi	110	430	Gymnosperm	3	Camp	1	Stone, 1971	27	NULL	Almond	2	50.3822	-79.5341	50.4617	-81.473	49.5133	-83.9592	41.7005	-108.702	72.75	0.85	75	coastal plain	4	4. coastal plain	NULL
	Lycopodiopsida	12	Selaginellales	73	Selaginellaceae	95	Foveosporites canalis	118	449	Fern/Moss	2	Camp	1	Stone, 1971	27	NULL	Almond	2	50.3822	-79.5341	50.4617	-81.473	49.5133	-83.9592	41.7005	-108.702	72.75	0.85	75	temperate lowland forest	2	2. temperate lowland forest	NULL
	Lycopodiopsida	12	Selaginellales	73	Selaginellaceae	95	Foveosporites triangulus	118	454	Fern/Moss	2	Camp	1	Stone, 1971	27	NULL	Almond	2	50.3822	-79.5341	50.4617	-81.473	49.5133	-83.9592	41.7005	-108.702	72.75	0.85	75	temperate lowland forest	2	2. temperate lowland forest	NULL
	Magnoliopsida	13	uncertain	80	uncertain	105	Fraxinoipollenites variabilis	122	465	Angiosperm	1	Camp	1	Stone, 1971	27	NULL	Almond	2	50.3822	-79.5341	50.4617	-81.473	49.5133	-83.9592	41.7005	-108.702	72.75	0.85	75	estuarine, aquatic	7	7. estuarine, aquatic	NULL
	Polypodiopsida	18	Gleicheniales	30	Gleicheniaceae	49	Gleicheniidites senonicus	128	482	Fern/Moss	2	Camp	1	Stone, 1971	27	NULL	Almond	2	50.3822	-79.5341	50.4617	-81.473	49.5133	-83.9592	41.7005	-108.702	72.75	0.85	75	swampy, lagoonal	3	3. swampy, lagoonal	NULL
	Lycopodiopsida	12	Lycopodiales	36	Lycopodiaceae	61	Hamulatisporis hamulatis	135	498	Fern/Moss	2	Camp	1	Stone, 1971	27	NULL	Almond	2	50.3822	-79.5341	50.4617	-81.473	49.5133	-83.9592	41.7005	-108.702	72.75	0.85	75	temperate lowland forest	2	2. temperate lowland forest	NULL
	Pinopsida	16	Pinales?	55	uncertain	105	Inaperturopollenites atlanticus	147	518	Gymnosperm	3	Camp	1	Stone, 1971	27	NULL	Almond	2	50.3822	-79.5341	50.4617	-81.473	49.5133	-83.9592	41.7005	-108.702	72.75	0.85	75	temperate lowland forest	2	2. temperate lowland forest	NULL
	Polypodiopsida	18	uncertain	80	uncertain	105	Laevigatosporites ovatus	158	567	Fern/Moss	2	Camp	1	Stone, 1971	27	NULL	Almond	2	50.3822	-79.5341	50.4617	-81.473	49.5133	-83.9592	41.7005	-108.702	72.75	0.85	75	coastal plain	4	4. coastal plain	NULL
	Liliopsida	10	Liliales	34	uncertain	105	Liliacidites complexus	168	591	Angiosperm	1	Camp	1	Stone, 1971	27	NULL	Almond	2	50.3822	-79.5341	50.4617	-81.473	49.5133	-83.9592	41.7005	-108.702	72.75	0.85	75	temperate lowland forest	2	2. temperate lowland forest	NULL
	Liliopsida	10	Liliales	34	uncertain	105	Liliacidites leei	168	595	Angiosperm	1	Camp	1	Stone, 1971	27	NULL	Almond	2	50.3822	-79.5341	50.4617	-81.473	49.5133	-83.9592	41.7005	-108.702	72.75	0.85	75	temperate lowland forest	2	2. temperate lowland forest	NULL
	Lycopodiopsida	12	Lycopodiales	36	Lycopodiaceae	61	Lycopodiumsporites austroclavatidites	175	616	Fern/Moss	2	Camp	1	Stone, 1971	27	NULL	Almond	2	50.3822	-79.5341	50.4617	-81.473	49.5133	-83.9592	41.7005	-108.702	72.75	0.85	75	upland forest	1	1. upland forest	NULL
	uncertain	23	uncertain	80	uncertain	105	Monosulcites scabratus	194	686	Gymnosperm	3	Camp	1	Stone, 1971	27	NULL	Almond	2	50.3822	-79.5341	50.4617	-81.473	49.5133	-83.9592	41.7005	-108.702	72.75	0.85	75	coastal plain	4	4. coastal plain	NULL
	Pinopsida	16	Pinales	54	Podocarpaceae	79	Phyllocladidites mawsonii	235	753	Gymnosperm	3	Camp	1	Stone, 1971	27	NULL	Almond	2	50.3822	-79.5341	50.4617	-81.473	49.5133	-83.9592	41.7005	-108.702	72.75	0.85	75	temperate lowland forest	2	2. temperate lowland forest	NULL
	uncertain	23	uncertain	80	uncertain	105	Pistillipollenites sp.	242	765	Angiosperm	1	Camp	1	Stone, 1971	27	NULL	Almond	2	50.3822	-79.5341	50.4617	-81.473	49.5133	-83.9592	41.7005	-108.702	72.75	0.85	75	coastal plain	4	4. coastal plain	NULL
	Magnoliopsida	13	Fagales?	29	Juglandaceae?	56	Plicapollis sp.	245	777	Angiosperm	1	Camp	1	Stone, 1971	27	NULL	Almond	2	50.3822	-79.5341	50.4617	-81.473	49.5133	-83.9592	41.7005	-108.702	72.75	0.85	75	coastal plain	4	4. coastal plain	NULL
	Pinopsida	16	Pinales	54	Podocarpaceae	79	Podocarpidites maximus	248	787	Gymnosperm	3	Camp	1	Stone, 1971	27	NULL	Almond	2	50.3822	-79.5341	50.4617	-81.473	49.5133	-83.9592	41.7005	-108.702	72.75	0.85	75	temperate lowland forest	2	2. temperate lowland forest	NULL
	Polypodiopsida	18	Polypodiales	59	uncertain	105	Polypodiisporites favus	255	814	Fern/Moss	2	Camp	1	Stone, 1971	27	NULL	Almond	2	50.3822	-79.5341	50.4617	-81.473	49.5133	-83.9592	41.7005	-108.702	72.75	0.85	75	temperate lowland forest	2	2. temperate lowland forest	NULL
	Magnoliopsida	13	Proteales	61	uncertain	105	Proteacidites retusus	262	831	Angiosperm	1	Camp	1	Stone, 1971	27	NULL	Almond	2	50.3822	-79.5341	50.4617	-81.473	49.5133	-83.9592	41.7005	-108.702	72.75	0.85	75	unknown	0	0. unknown	NULL
	Magnoliopsida	13	Proteales	61	uncertain	105	Proteacidites thalmanii	262	835	Angiosperm	1	Camp	1	Stone, 1971	27	NULL	Almond	2	50.3822	-79.5341	50.4617	-81.473	49.5133	-83.9592	41.7005	-108.702	72.75	0.85	75	unknown	0	0. unknown	NULL
	Liliopsida	10	Poales?	58	Juncaceae?	57	Quadripollis krempii	276	856	Angiosperm	1	Camp	1	Stone, 1971	27	NULL	Almond	2	50.3822	-79.5341	50.4617	-81.473	49.5133	-83.9592	41.7005	-108.702	72.75	0.85	75	tropical lowland forest	6	6. tropical lowland forest	NULL
	Pinopsida	16	uncertain	80	uncertain	105	Rugubivesiculites floridus	297	913	Gymnosperm	3	Camp	1	Stone, 1971	27	NULL	Almond	2	50.3822	-79.5341	50.4617	-81.473	49.5133	-83.9592	41.7005	-108.702	72.75	0.85	75	coastal plain	4	4. coastal plain	NULL
	uncertain	23	uncertain	80	uncertain	105	Spermatites sp.	320	960	Gymnosperm	3	Camp	1	Stone, 1971	27	NULL	Almond	2	50.3822	-79.5341	50.4617	-81.473	49.5133	-83.9592	41.7005	-108.702	72.75	0.85	75	swampy, lagoonal	3	3. swampy, lagoonal	NULL
	Magnoliopsida	13	Fagales?	29	Juglandaceae?	56	Sporopollis cf. S. laqueaeformis	324	973	Angiosperm	1	Camp	1	Stone, 1971	27	NULL	Almond	2	50.3822	-79.5341	50.4617	-81.473	49.5133	-83.9592	41.7005	-108.702	72.75	0.85	75	wet, successional	5	5. wet, successional	NULL
	Bryopsida	3	uncertain	80	uncertain	105	Stereisporites antiquasporites	329	987	Fern/Moss	2	Camp	1	Stone, 1971	27	NULL	Almond	2	50.3822	-79.5341	50.4617	-81.473	49.5133	-83.9592	41.7005	-108.702	72.75	0.85	75	coastal plain	4	4. coastal plain	NULL
	Polypodiopsida	18	Osmundales?	52	Osmundaceae?	75	Todisporites cf. T. minor	352	1029	Fern/Moss	2	Camp	1	Stone, 1971	27	NULL	Almond	2	50.3822	-79.5341	50.4617	-81.473	49.5133	-83.9592	41.7005	-108.702	72.75	0.85	75	temperate lowland forest	2	2. temperate lowland forest	NULL
	Magnoliopsida	13	Magnoliales?	39	uncertain	105	Tricolpites anguloluminosis	358	1051	Angiosperm	1	Camp	1	Stone, 1971	27	NULL	Almond	2	50.3822	-79.5341	50.4617	-81.473	49.5133	-83.9592	41.7005	-108.702	72.75	0.85	75	coastal plain	4	4. coastal plain	NULL
	Magnoliopsida	13	Magnoliales?	39	uncertain	105	Tricolpites bathyreticulatus	358	1053	Angiosperm	1	Camp	1	Stone, 1971	27	NULL	Almond	2	50.3822	-79.5341	50.4617	-81.473	49.5133	-83.9592	41.7005	-108.702	72.75	0.85	75	coastal plain	4	4. coastal plain	NULL
	Magnoliopsida	13	Magnoliales?	39	uncertain	105	Tricolpites lillei	358	1063	Angiosperm	1	Camp	1	Stone, 1971	27	NULL	Almond	2	50.3822	-79.5341	50.4617	-81.473	49.5133	-83.9592	41.7005	-108.702	72.75	0.85	75	coastal plain	4	4. coastal plain	NULL
	Magnoliopsida	13	Magnoliales?	39	uncertain	105	Tricolpites mutabilis	358	1068	Angiosperm	1	Camp	1	Stone, 1971	27	NULL	Almond	2	50.3822	-79.5341	50.4617	-81.473	49.5133	-83.9592	41.7005	-108.702	72.75	0.85	75	coastal plain	4	4. coastal plain	NULL
	Magnoliopsida	13	Magnoliales?	39	uncertain	105	Tricolpites psilascabratus	358	1073	Angiosperm	1	Camp	1	Stone, 1971	27	NULL	Almond	2	50.3822	-79.5341	50.4617	-81.473	49.5133	-83.9592	41.7005	-108.702	72.75	0.85	75	coastal plain	4	4. coastal plain	NULL
	Magnoliopsida	13	Magnoliales?	39	uncertain	105	Tricolpites reticulatus	358	1076	Angiosperm	1	Camp	1	Stone, 1971	27	NULL	Almond	2	50.3822	-79.5341	50.4617	-81.473	49.5133	-83.9592	41.7005	-108.702	72.75	0.85	75	coastal plain	4	4. coastal plain	NULL
	uncertain	23	uncertain	80	uncertain	105	Tricolpopollenites clavireticulatus	359	1082	Angiosperm	1	Camp	1	Stone, 1971	27	NULL	Almond	2	50.3822	-79.5341	50.4617	-81.473	49.5133	-83.9592	41.7005	-108.702	72.75	0.85	75	coastal plain	4	4. coastal plain	NULL
	uncertain	23	uncertain	80	uncertain	105	Tricolpopollenites compactus	359	1083	Angiosperm	1	Camp	1	Stone, 1971	27	NULL	Almond	2	50.3822	-79.5341	50.4617	-81.473	49.5133	-83.9592	41.7005	-108.702	72.75	0.85	75	coastal plain	4	4. coastal plain	NULL
	uncertain	23	uncertain	80	uncertain	105	Tricolpopollenites deliclavatus	359	1084	Angiosperm	1	Camp	1	Stone, 1971	27	NULL	Almond	2	50.3822	-79.5341	50.4617	-81.473	49.5133	-83.9592	41.7005	-108.702	72.75	0.85	75	coastal plain	4	4. coastal plain	NULL
	uncertain	23	uncertain	80	uncertain	105	Tricolpopollenites microreticulatus	359	1087	Angiosperm	1	Camp	1	Stone, 1971	27	NULL	Almond	2	50.3822	-79.5341	50.4617	-81.473	49.5133	-83.9592	41.7005	-108.702	72.75	0.85	75	coastal plain	4	4. coastal plain	NULL
	uncertain	23	uncertain	80	uncertain	105	Tricolpopollenites microscabratus	359	1088	Angiosperm	1	Camp	1	Stone, 1971	27	NULL	Almond	2	50.3822	-79.5341	50.4617	-81.473	49.5133	-83.9592	41.7005	-108.702	72.75	0.85	75	coastal plain	4	4. coastal plain	NULL
	uncertain	23	uncertain	80	uncertain	105	Tricolpopollenites spp.	359	1093	Angiosperm	1	Camp	1	Stone, 1971	27	NULL	Almond	2	50.3822	-79.5341	50.4617	-81.473	49.5133	-83.9592	41.7005	-108.702	72.75	0.85	75	coastal plain	4	4. coastal plain	NULL
	Magnoliopsida	13	Malpighiales	40	Euphorbiaceae	43	Tricolporopollenites affluens	362	1104	Angiosperm	1	Camp	1	Stone, 1971	27	NULL	Almond	2	50.3822	-79.5341	50.4617	-81.473	49.5133	-83.9592	41.7005	-108.702	72.75	0.85	75	temperate lowland forest	2	2. temperate lowland forest	NULL
	Magnoliopsida	13	Proteales	61	Proteaceae	84	Triporopollenites rugatus	370	1137	Angiosperm	1	Camp	1	Stone, 1971	27	NULL	Almond	2	50.3822	-79.5341	50.4617	-81.473	49.5133	-83.9592	41.7005	-108.702	72.75	0.85	75	coastal plain	4	4. coastal plain	NULL
	Magnoliopsida	13	Proteales	61	Proteaceae	84	Triporopollenites sp.	370	1139	Angiosperm	1	Camp	1	Stone, 1971	27	NULL	Almond	2	50.3822	-79.5341	50.4617	-81.473	49.5133	-83.9592	41.7005	-108.702	72.75	0.85	75	coastal plain	4	4. coastal plain	NULL
	Magnoliopsida	13	Fagales	28	Juglandaceae	55	Trudopollis meekeri	375	1148	Angiosperm	1	Camp	1	Stone, 1971	27	NULL	Almond	2	50.3822	-79.5341	50.4617	-81.473	49.5133	-83.9592	41.7005	-108.702	72.75	0.85	75	temperate lowland forest	2	2. temperate lowland forest	NULL
	Magnoliopsida	13	Rosales	63	Ulmaceae	102	Ulmipollenites sp.	380	1162	Angiosperm	1	Camp	1	Stone, 1971	27	NULL	Almond	2	50.3822	-79.5341	50.4617	-81.473	49.5133	-83.9592	41.7005	-108.702	72.75	0.85	75	temperate lowland forest	2	2. temperate lowland forest	NULL
	Pteridospermatopsida?	21	Caytoniales?	11	Caytoniaceae?	22	Vitreisporites pallidus	393	1186	Gymnosperm	3	Camp	1	Stone, 1971	27	NULL	Almond	2	50.3822	-79.5341	50.4617	-81.473	49.5133	-83.9592	41.7005	-108.702	72.75	0.85	75	temperate lowland forest	2	2. temperate lowland forest	NULL
	Marchantiopsida	15	uncertain	80	uncertain	105	Zlivisporis novomexicanum	397	1200	Fern/Moss	2	Camp	1	Stone, 1971	27	NULL	Almond	2	50.3822	-79.5341	50.4617	-81.473	49.5133	-83.9592	41.7005	-108.702	72.75	0.85	75	swampy, lagoonal	3	3. swampy, lagoonal	NULL
	Magnoliopsida	13	Santalales?	66	uncertain	105	Accuratipollis spp.	5	14	Angiosperm	1	Camp	1	Tschudy, 1973a	28	1.73293	Fruitland, Pictured Cliffs	25	45.2358	-79.8468	45.3134	-81.7042	44.3636	-84.1052	36.6818	-107.206	76.05	0.85	75	swampy, lagoonal	3	3. swampy, lagoonal	NULL
	Marchantiopsida	15	Sphaerocarpales	75	uncertain	105	Aequitriradites sp.	9	20	Fern/Moss	2	Camp	1	Tschudy, 1973a	28	0.152905	Fruitland, Pictured Cliffs	25	45.2358	-79.8468	45.3134	-81.7042	44.3636	-84.1052	36.6818	-107.206	76.05	0.85	75	coastal plain	4	4. coastal plain	NULL
	Marchantiopsida	15	Sphaerocarpales	75	uncertain	105	Aequitriradites spinulosus	9	21	Fern/Moss	2	Camp	1	Tschudy, 1973a	28	0.458716	Fruitland, Pictured Cliffs	25	45.2358	-79.8468	45.3134	-81.7042	44.3636	-84.1052	36.6818	-107.206	76.05	0.85	75	coastal plain	4	4. coastal plain	NULL
	Polypodiopsida	18	Cyatheales	16	Cyatheaceae	31	Alsophilidites sp.	16	40	Fern/Moss	2	Camp	1	Tschudy, 1973a	28	0.0509684	Fruitland, Pictured Cliffs	25	45.2358	-79.8468	45.3134	-81.7042	44.3636	-84.1052	36.6818	-107.206	76.05	0.85	75	tropical lowland forest	6	6. tropical lowland forest	NULL
	Polypodiopsida	18	Schizaeales	71	uncertain	105	Appendicisporites spp.	21	56	Fern/Moss	2	Camp	1	Tschudy, 1973a	28	0.152905	Fruitland, Pictured Cliffs	25	45.2358	-79.8468	45.3134	-81.7042	44.3636	-84.1052	36.6818	-107.206	76.05	0.85	75	temperate lowland forest	2	2. temperate lowland forest	NULL
	Magnoliopsida	13	Santalales?	66	Santalaceae?	90	Aquilapollenites attenuatus	22	69	Angiosperm	1	Camp	1	Tschudy, 1973a	28	0.203874	Fruitland, Pictured Cliffs	25	45.2358	-79.8468	45.3134	-81.7042	44.3636	-84.1052	36.6818	-107.206	76.05	0.85	75	temperate lowland forest	2	2. temperate lowland forest	NULL
	Magnoliopsida	13	Santalales?	66	Santalaceae?	90	Aquilapollenites delicatus	22	90	Angiosperm	1	Camp	1	Tschudy, 1973a	28	0.0509684	Fruitland, Pictured Cliffs	25	45.2358	-79.8468	45.3134	-81.7042	44.3636	-84.1052	36.6818	-107.206	76.05	0.85	75	temperate lowland forest	2	2. temperate lowland forest	NULL
	Magnoliopsida	13	Santalales?	66	Santalaceae?	90	Aquilapollenites quadrilobus	22	124	Angiosperm	1	Camp	1	Tschudy, 1973a	28	0.356779	Fruitland, Pictured Cliffs	25	45.2358	-79.8468	45.3134	-81.7042	44.3636	-84.1052	36.6818	-107.206	76.05	0.85	75	temperate lowland forest	2	2. temperate lowland forest	NULL
	Magnoliopsida	13	Santalales?	66	Santalaceae?	90	Aquilapollenites senonicus	22	129	Angiosperm	1	Camp	1	Tschudy, 1973a	28	0.0509684	Fruitland, Pictured Cliffs	25	45.2358	-79.8468	45.3134	-81.7042	44.3636	-84.1052	36.6818	-107.206	76.05	0.85	75	temperate lowland forest	2	2. temperate lowland forest	NULL
	Magnoliopsida	13	Santalales?	66	Santalaceae?	90	Aquilapollenites spp.	22	135	Angiosperm	1	Camp	1	Tschudy, 1973a	28	0.0509684	Fruitland, Pictured Cliffs	25	45.2358	-79.8468	45.3134	-81.7042	44.3636	-84.1052	36.6818	-107.206	76.05	0.85	75	temperate lowland forest	2	2. temperate lowland forest	NULL
	Magnoliopsida	13	Santalales?	66	Santalaceae?	90	Aquilapollenites turbidus	22	141	Angiosperm	1	Camp	1	Tschudy, 1973a	28	0.254842	Fruitland, Pictured Cliffs	25	45.2358	-79.8468	45.3134	-81.7042	44.3636	-84.1052	36.6818	-107.206	76.05	0.85	75	temperate lowland forest	2	2. temperate lowland forest	NULL
	Pinopsida	16	Pinales	54	Araucariaceae	10	Araucariacites sp.	24	149	Gymnosperm	3	Camp	1	Tschudy, 1973a	28	0.101937	Fruitland, Pictured Cliffs	25	45.2358	-79.8468	45.3134	-81.7042	44.3636	-84.1052	36.6818	-107.206	76.05	0.85	75	coastal plain	4	4. coastal plain	NULL
	Liliopsida	10	Arecales	6	uncertain	105	Arecipites spp.	25	156	Angiosperm	1	Camp	1	Tschudy, 1973a	28	3.61876	Fruitland, Pictured Cliffs	25	45.2358	-79.8468	45.3134	-81.7042	44.3636	-84.1052	36.6818	-107.206	76.05	0.85	75	swampy, lagoonal	3	3. swampy, lagoonal	NULL
	Polypodiopsida	18	uncertain	80	uncertain	105	Baculatisporites sp.	30	184	Fern/Moss	2	Camp	1	Tschudy, 1973a	28	0.203874	Fruitland, Pictured Cliffs	25	45.2358	-79.8468	45.3134	-81.7042	44.3636	-84.1052	36.6818	-107.206	76.05	0.85	75	coastal plain	4	4. coastal plain	NULL
	Polypodiopsida	18	Schizaeales	71	Schizaeaceae	93	Biretisporites sp.	38	208	Fern/Moss	2	Camp	1	Tschudy, 1973a	28	0.764526	Fruitland, Pictured Cliffs	25	45.2358	-79.8468	45.3134	-81.7042	44.3636	-84.1052	36.6818	-107.206	76.05	0.85	75	temperate lowland forest	2	2. temperate lowland forest	NULL
	Lycopodiopsida	12	Lycopodiales	36	uncertain	105	Camarozonosporites spp.	44	227	Fern/Moss	2	Camp	1	Tschudy, 1973a	28	0.152905	Fruitland, Pictured Cliffs	25	45.2358	-79.8468	45.3134	-81.7042	44.3636	-84.1052	36.6818	-107.206	76.05	0.85	75	coastal plain	4	4. coastal plain	NULL
	Polypodiopsida	18	Schizaeales	71	Schizaeaceae	93	Cicatricosisporites spp.	58	274	Fern/Moss	2	Camp	1	Tschudy, 1973a	28	1.17227	Fruitland, Pictured Cliffs	25	45.2358	-79.8468	45.3134	-81.7042	44.3636	-84.1052	36.6818	-107.206	76.05	0.85	75	temperate lowland forest	2	2. temperate lowland forest	NULL
	Pinopsida	16	Pinales	54	Cheirolepidiaceae	25	Classopollis sp.	65	300	Gymnosperm	3	Camp	1	Tschudy, 1973a	28	2.19164	Fruitland, Pictured Cliffs	25	45.2358	-79.8468	45.3134	-81.7042	44.3636	-84.1052	36.6818	-107.206	76.05	0.85	75	temperate lowland forest	2	2. temperate lowland forest	NULL
	Polypodiopsida?	19	uncertain	80	uncertain	105	Concavisporites verrucosus	70	312	Fern/Moss	2	Camp	1	Tschudy, 1973a	28	0.30581	Fruitland, Pictured Cliffs	25	45.2358	-79.8468	45.3134	-81.7042	44.3636	-84.1052	36.6818	-107.206	76.05	0.85	75	coastal plain	4	4. coastal plain	NULL
	Magnoliopsida	13	Sapindales	67	Sapindaceae	91	Cupanieidites sp.	79	337	Angiosperm	1	Camp	1	Tschudy, 1973a	28	0.0509684	Fruitland, Pictured Cliffs	25	45.2358	-79.8468	45.3134	-81.7042	44.3636	-84.1052	36.6818	-107.206	76.05	0.85	75	wet, successional	5	5. wet, successional	NULL
	Polypodiopsida?	19	Cyatheales?	17	Cyatheaceae?	32	Cyathidites spp.	82	352	Fern/Moss	2	Camp	1	Tschudy, 1973a	28	3.51682	Fruitland, Pictured Cliffs	25	45.2358	-79.8468	45.3134	-81.7042	44.3636	-84.1052	36.6818	-107.206	76.05	0.85	75	temperate lowland forest	2	2. temperate lowland forest	NULL
	Magnoliopsida	13	Ericales	24	Cyrillaceae	34	Cyrilla minima	85	363	Angiosperm	1	Camp	1	Tschudy, 1973a	28	0.509684	Fruitland, Pictured Cliffs	25	45.2358	-79.8468	45.3134	-81.7042	44.3636	-84.1052	36.6818	-107.206	76.05	0.85	75	swampy, lagoonal	3	3. swampy, lagoonal	NULL
	Polypodiopsida	18	uncertain	80	uncertain	105	Deltoidospora spp.	86	369	Fern/Moss	2	Camp	1	Tschudy, 1973a	28	0.101937	Fruitland, Pictured Cliffs	25	45.2358	-79.8468	45.3134	-81.7042	44.3636	-84.1052	36.6818	-107.206	76.05	0.85	75	temperate lowland forest	2	2. temperate lowland forest	NULL
	Lycopodiopsida	12	Selaginellales?	74	Selaginellaceae?	96	Echinatisporis sp.	97	387	Fern/Moss	2	Camp	1	Tschudy, 1973a	28	2.54842	Fruitland, Pictured Cliffs	25	45.2358	-79.8468	45.3134	-81.7042	44.3636	-84.1052	36.6818	-107.206	76.05	0.85	75	estuarine, aquatic	7	7. estuarine, aquatic	NULL
	Magnoliopsida	13	Fagales	28	Juglandaceae	55	Engelhardtia sp.	100	393	Angiosperm	1	Camp	1	Tschudy, 1973a	28	0.152905	Fruitland, Pictured Cliffs	25	45.2358	-79.8468	45.3134	-81.7042	44.3636	-84.1052	36.6818	-107.206	76.05	0.85	75	wet, successional	5	5. wet, successional	NULL
	Polypodiopsida	18	Equisetales	22	Equisetaceae	39	Equisetosporites spp.	106	417	Fern/Moss	2	Camp	1	Tschudy, 1973a	28	1.17227	Fruitland, Pictured Cliffs	25	45.2358	-79.8468	45.3134	-81.7042	44.3636	-84.1052	36.6818	-107.206	76.05	0.85	75	open scrubland	8	8. open scrubland	NULL
	Magnoliopsida	13	Ericales?	25	Ericaceae?	42	Ericaceoipollenites sp.	108	426	Angiosperm	1	Camp	1	Tschudy, 1973a	28	0.509684	Fruitland, Pictured Cliffs	25	45.2358	-79.8468	45.3134	-81.7042	44.3636	-84.1052	36.6818	-107.206	76.05	0.85	75	wet, successional	5	5. wet, successional	NULL
	Cycadopsida	5	Cycadales	18	uncertain	105	Eucommiidites sp.	110	433	Gymnosperm	3	Camp	1	Tschudy, 1973a	28	0.0509684	Fruitland, Pictured Cliffs	25	45.2358	-79.8468	45.3134	-81.7042	44.3636	-84.1052	36.6818	-107.206	76.05	0.85	75	coastal plain	4	4. coastal plain	NULL
	Bryopsida?	4	uncertain	80	uncertain	105	Foraminisporis sp.	116	443	Fern/Moss	2	Camp	1	Tschudy, 1973a	28	0.764526	Fruitland, Pictured Cliffs	25	45.2358	-79.8468	45.3134	-81.7042	44.3636	-84.1052	36.6818	-107.206	76.05	0.85	75	coastal plain	4	4. coastal plain	NULL
	Polypodiopsida	18	uncertain	80	uncertain	105	Ghoshispora spp.	126	475	Fern/Moss	2	Camp	1	Tschudy, 1973a	28	1.37615	Fruitland, Pictured Cliffs	25	45.2358	-79.8468	45.3134	-81.7042	44.3636	-84.1052	36.6818	-107.206	76.05	0.85	75	swampy, lagoonal	3	3. swampy, lagoonal	NULL
	Polypodiopsida	18	Gleicheniales	30	Gleicheniaceae	49	Gleicheniidites spp.	128	484	Fern/Moss	2	Camp	1	Tschudy, 1973a	28	0.560652	Fruitland, Pictured Cliffs	25	45.2358	-79.8468	45.3134	-81.7042	44.3636	-84.1052	36.6818	-107.206	76.05	0.85	75	swampy, lagoonal	3	3. swampy, lagoonal	NULL
	Magnoliopsida	13	Aquifoliales	5	Aquifoliaceae	6	Ilexpollenites sp.	145	516	Angiosperm	1	Camp	1	Tschudy, 1973a	28	6.21814	Fruitland, Pictured Cliffs	25	45.2358	-79.8468	45.3134	-81.7042	44.3636	-84.1052	36.6818	-107.206	76.05	0.85	75	temperate lowland forest	2	2. temperate lowland forest	NULL
	Polypodiopsida	18	Schizaeales	71	Schizaeaceae	93	Klukisporites spp.	155	547	Fern/Moss	2	Camp	1	Tschudy, 1973a	28	0.560652	Fruitland, Pictured Cliffs	25	45.2358	-79.8468	45.3134	-81.7042	44.3636	-84.1052	36.6818	-107.206	76.05	0.85	75	tropical lowland forest	6	6. tropical lowland forest	NULL
	Magnoliopsida	13	Fagales	28	uncertain	105	Kurtzipites trispissatus	156	554	Angiosperm	1	Camp	1	Tschudy, 1973a	28	0.0509684	Fruitland, Pictured Cliffs	25	45.2358	-79.8468	45.3134	-81.7042	44.3636	-84.1052	36.6818	-107.206	76.05	0.85	75	temperate lowland forest	2	2. temperate lowland forest	NULL
	Polypodiopsida	18	Cyatheales	16	Cyatheaceae	31	Kuylisporites sp.	157	556	Fern/Moss	2	Camp	1	Tschudy, 1973a	28	0.254842	Fruitland, Pictured Cliffs	25	45.2358	-79.8468	45.3134	-81.7042	44.3636	-84.1052	36.6818	-107.206	76.05	0.85	75	tropical lowland forest	6	6. tropical lowland forest	NULL
	Polypodiopsida	18	uncertain	80	uncertain	105	Laevigatosporites spp.	158	570	Fern/Moss	2	Camp	1	Tschudy, 1973a	28	11.6208	Fruitland, Pictured Cliffs	25	45.2358	-79.8468	45.3134	-81.7042	44.3636	-84.1052	36.6818	-107.206	76.05	0.85	75	coastal plain	4	4. coastal plain	NULL
	Lycopodiopsida	12	uncertain	80	uncertain	105	Leptolepidites major	162	579	Fern/Moss	2	Camp	1	Tschudy, 1973a	28	0.152905	Fruitland, Pictured Cliffs	25	45.2358	-79.8468	45.3134	-81.7042	44.3636	-84.1052	36.6818	-107.206	76.05	0.85	75	coastal plain	4	4. coastal plain	NULL
	Liliopsida	10	Liliales	34	uncertain	105	Liliacidites complexus	168	591	Angiosperm	1	Camp	1	Tschudy, 1973a	28	2.85423	Fruitland, Pictured Cliffs	25	45.2358	-79.8468	45.3134	-81.7042	44.3636	-84.1052	36.6818	-107.206	76.05	0.85	75	temperate lowland forest	2	2. temperate lowland forest	NULL
	Liliopsida	10	Liliales	34	uncertain	105	Liliacidites spp.	168	599	Angiosperm	1	Camp	1	Tschudy, 1973a	28	0.509684	Fruitland, Pictured Cliffs	25	45.2358	-79.8468	45.3134	-81.7042	44.3636	-84.1052	36.6818	-107.206	76.05	0.85	75	temperate lowland forest	2	2. temperate lowland forest	NULL
	Polypodiopsida	18	Ophioglossales	50	Ophioglossaceae	73	Lycopodiacidites kuepperi	173	611	Fern/Moss	2	Camp	1	Tschudy, 1973a	28	0.0509684	Fruitland, Pictured Cliffs	25	45.2358	-79.8468	45.3134	-81.7042	44.3636	-84.1052	36.6818	-107.206	76.05	0.85	75	temperate lowland forest	2	2. temperate lowland forest	NULL
	Polypodiopsida	18	Ophioglossales	50	Ophioglossaceae	73	Lycopodiacidites spp.	173	613	Fern/Moss	2	Camp	1	Tschudy, 1973a	28	0.560652	Fruitland, Pictured Cliffs	25	45.2358	-79.8468	45.3134	-81.7042	44.3636	-84.1052	36.6818	-107.206	76.05	0.85	75	temperate lowland forest	2	2. temperate lowland forest	NULL
	Lycopodiopsida	12	Lycopodiales	36	Lycopodiaceae	61	Lycopodiumsporites spp.	175	622	Fern/Moss	2	Camp	1	Tschudy, 1973a	28	0.560652	Fruitland, Pictured Cliffs	25	45.2358	-79.8468	45.3134	-81.7042	44.3636	-84.1052	36.6818	-107.206	76.05	0.85	75	upland forest	1	1. upland forest	NULL
	Polypodiopsida	18	Schizaeales	71	Schizaeaceae	93	Microfoveolatosporis canaliculatus	186	659	Fern/Moss	2	Camp	1	Tschudy, 1973a	28	1.32518	Fruitland, Pictured Cliffs	25	45.2358	-79.8468	45.3134	-81.7042	44.3636	-84.1052	36.6818	-107.206	76.05	0.85	75	temperate lowland forest	2	2. temperate lowland forest	NULL
	Polypodiopsida	18	uncertain	80	uncertain	105	Microreticulatisporites sp.	187	661	Fern/Moss	2	Camp	1	Tschudy, 1973a	28	0.101937	Fruitland, Pictured Cliffs	25	45.2358	-79.8468	45.3134	-81.7042	44.3636	-84.1052	36.6818	-107.206	76.05	0.85	75	wet, successional	5	5. wet, successional	NULL
	Magnoliopsida	13	Fagales?	29	Juglandaceae	55	Minorpollis sp.	188	664	Angiosperm	1	Camp	1	Tschudy, 1973a	28	0.101937	Fruitland, Pictured Cliffs	25	45.2358	-79.8468	45.3134	-81.7042	44.3636	-84.1052	36.6818	-107.206	76.05	0.85	75	temperate lowland forest	2	2. temperate lowland forest	NULL
	Magnoliopsida	13	uncertain	80	uncertain	105	Momipites sanjuanensis	190	668	Angiosperm	1	Camp	1	Tschudy, 1973a	28	4.07747	Fruitland, Pictured Cliffs	25	45.2358	-79.8468	45.3134	-81.7042	44.3636	-84.1052	36.6818	-107.206	76.05	0.85	75	temperate lowland forest	2	2. temperate lowland forest	NULL
	uncertain	23	uncertain	80	uncertain	105	Myrtaceoipollenites peritus	201	697	Angiosperm	1	Camp	1	Tschudy, 1973a	28	0.0509684	Fruitland, Pictured Cliffs	25	45.2358	-79.8468	45.3134	-81.7042	44.3636	-84.1052	36.6818	-107.206	76.05	0.85	75	tropical lowland forest	6	6. tropical lowland forest	NULL
	Lycopodiopsida	12	Selaginellales	73	Selaginellaceae	95	Neoraistrickia truncatus	204	702	Fern/Moss	2	Camp	1	Tschudy, 1973a	28	0.0509684	Fruitland, Pictured Cliffs	25	45.2358	-79.8468	45.3134	-81.7042	44.3636	-84.1052	36.6818	-107.206	76.05	0.85	75	tropical lowland forest	6	6. tropical lowland forest	NULL
	Magnoliopsida	13	Cornales	13	Nyssaceae	70	Nyssa puercoensis	209	708	Angiosperm	1	Camp	1	Tschudy, 1973a	28	0.0509684	Fruitland, Pictured Cliffs	25	45.2358	-79.8468	45.3134	-81.7042	44.3636	-84.1052	36.6818	-107.206	76.05	0.85	75	wet, successional	5	5. wet, successional	NULL
	Polypodiopsida	18	Osmundales	51	Osmundaceae	74	Osmundacidites sp.	215	720	Fern/Moss	2	Camp	1	Tschudy, 1973a	28	0.203874	Fruitland, Pictured Cliffs	25	45.2358	-79.8468	45.3134	-81.7042	44.3636	-84.1052	36.6818	-107.206	76.05	0.85	75	temperate lowland forest	2	2. temperate lowland forest	NULL
	Liliopsida	10	Alismatales	1	Araceae?	8	Pandaniidites radicus	221	732	Angiosperm	1	Camp	1	Tschudy, 1973a	28	0.101937	Fruitland, Pictured Cliffs	25	45.2358	-79.8468	45.3134	-81.7042	44.3636	-84.1052	36.6818	-107.206	76.05	0.85	75	swampy, lagoonal	3	3. swampy, lagoonal	NULL
	uncertain	23	uncertain	80	uncertain	105	Phaseoliidites stanleyi	233	751	Angiosperm	1	Camp	1	Tschudy, 1973a	28	0.356779	Fruitland, Pictured Cliffs	25	45.2358	-79.8468	45.3134	-81.7042	44.3636	-84.1052	36.6818	-107.206	76.05	0.85	75	tropical lowland forest	6	6. tropical lowland forest	NULL
	Polypodiopsida	18	Polypodiales	59	Polypodiaceae	81	Polypodiidites sp.	254	810	Fern/Moss	2	Camp	1	Tschudy, 1973a	28	0.152905	Fruitland, Pictured Cliffs	25	45.2358	-79.8468	45.3134	-81.7042	44.3636	-84.1052	36.6818	-107.206	76.05	0.85	75	temperate lowland forest	2	2. temperate lowland forest	NULL
	Polypodiopsida	18	Polypodiales	59	uncertain	105	Polypodiisporites amplus	255	812	Fern/Moss	2	Camp	1	Tschudy, 1973a	28	0.0509684	Fruitland, Pictured Cliffs	25	45.2358	-79.8468	45.3134	-81.7042	44.3636	-84.1052	36.6818	-107.206	76.05	0.85	75	temperate lowland forest	2	2. temperate lowland forest	NULL
	Polypodiopsida	18	Polypodiales	59	uncertain	105	Polypodiisporites sp.	255	815	Fern/Moss	2	Camp	1	Tschudy, 1973a	28	0.0509684	Fruitland, Pictured Cliffs	25	45.2358	-79.8468	45.3134	-81.7042	44.3636	-84.1052	36.6818	-107.206	76.05	0.85	75	temperate lowland forest	2	2. temperate lowland forest	NULL
	Magnoliopsida	13	Proteales	61	uncertain	105	Proteacidites spp.	262	833	Angiosperm	1	Camp	1	Tschudy, 1973a	28	18.0428	Fruitland, Pictured Cliffs	25	45.2358	-79.8468	45.3134	-81.7042	44.3636	-84.1052	36.6818	-107.206	76.05	0.85	75	unknown	0	0. unknown	NULL
	Magnoliopsida	13	Ericales	24	Sapotaceae?	92	quadrapollenites sp.	275	1210	Angiosperm	1	Camp	1	Tschudy, 1973a	28	0.101937	Fruitland, Pictured Cliffs	25	45.2358	-79.8468	45.3134	-81.7042	44.3636	-84.1052	36.6818	-107.206	76.05	0.85	75	tropical lowland forest	6	6. tropical lowland forest	NULL
	Magnoliopsida	13	Fagales	28	Fagaceae	47	Quercus explanata	278	862	Angiosperm	1	Camp	1	Tschudy, 1973a	28	0.30581	Fruitland, Pictured Cliffs	25	45.2358	-79.8468	45.3134	-81.7042	44.3636	-84.1052	36.6818	-107.206	76.05	0.85	75	temperate lowland forest	2	2. temperate lowland forest	NULL
	uncertain	23	uncertain	80	uncertain	105	Radialetes costatus	280	864	Fern/Moss	2	Camp	1	Tschudy, 1973a	28	0.0509684	Fruitland, Pictured Cliffs	25	45.2358	-79.8468	45.3134	-81.7042	44.3636	-84.1052	36.6818	-107.206	76.05	0.85	75	unknown	0	0. unknown	NULL
	Magnoliopsida	13	Malpighiales	40	Salicaceae	87	Salixipollenites sp.	302	920	Angiosperm	1	Camp	1	Tschudy, 1973a	28	0.152905	Fruitland, Pictured Cliffs	25	45.2358	-79.8468	45.3134	-81.7042	44.3636	-84.1052	36.6818	-107.206	76.05	0.85	75	wet, successional	5	5. wet, successional	NULL
	Bryopsida	3	uncertain	80	uncertain	105	Stereisporites spp.	329	993	Fern/Moss	2	Camp	1	Tschudy, 1973a	28	1.68196	Fruitland, Pictured Cliffs	25	45.2358	-79.8468	45.3134	-81.7042	44.3636	-84.1052	36.6818	-107.206	76.05	0.85	75	coastal plain	4	4. coastal plain	NULL
	Magnoliopsida	13	Fagales	28	Juglandaceae	55	Subtriporopollenites sp.	336	1005	Angiosperm	1	Camp	1	Tschudy, 1973a	28	0.101937	Fruitland, Pictured Cliffs	25	45.2358	-79.8468	45.3134	-81.7042	44.3636	-84.1052	36.6818	-107.206	76.05	0.85	75	temperate lowland forest	2	2. temperate lowland forest	NULL
	Bryopsida?	4	uncertain	80	uncertain	105	Taurocusporites sp.	340	1012	Fern/Moss	2	Camp	1	Tschudy, 1973a	28	0.254842	Fruitland, Pictured Cliffs	25	45.2358	-79.8468	45.3134	-81.7042	44.3636	-84.1052	36.6818	-107.206	76.05	0.85	75	temperate lowland forest	2	2. temperate lowland forest	NULL
	Pinopsida	16	Pinales	54	Cupressaceae?	30	Taxodiaceaepollenites sp.	343	1016	Gymnosperm	3	Camp	1	Tschudy, 1973a	28	1.37615	Fruitland, Pictured Cliffs	25	45.2358	-79.8468	45.3134	-81.7042	44.3636	-84.1052	36.6818	-107.206	76.05	0.85	75	temperate lowland forest	2	2. temperate lowland forest	NULL
	Magnoliopsida	13	Malvales	42	Malvaceae	65	Tilia wodehousei	350	1027	Angiosperm	1	Camp	1	Tschudy, 1973a	28	0.203874	Fruitland, Pictured Cliffs	25	45.2358	-79.8468	45.3134	-81.7042	44.3636	-84.1052	36.6818	-107.206	76.05	0.85	75	temperate lowland forest	2	2. temperate lowland forest	NULL
	uncertain	23	uncertain	80	uncertain	105	Toroisporis sp.	354	1037	Fern/Moss	2	Camp	1	Tschudy, 1973a	28	0.203874	Fruitland, Pictured Cliffs	25	45.2358	-79.8468	45.3134	-81.7042	44.3636	-84.1052	36.6818	-107.206	76.05	0.85	75	coastal plain	4	4. coastal plain	NULL
	Magnoliopsida	13	Magnoliales?	39	uncertain	105	Tricolpites hians	358	1060	Angiosperm	1	Camp	1	Tschudy, 1973a	28	0.101937	Fruitland, Pictured Cliffs	25	45.2358	-79.8468	45.3134	-81.7042	44.3636	-84.1052	36.6818	-107.206	76.05	0.85	75	coastal plain	4	4. coastal plain	NULL
	Magnoliopsida	13	Magnoliales?	39	uncertain	105	Tricolpites reticulatus	358	1076	Angiosperm	1	Camp	1	Tschudy, 1973a	28	2.75229	Fruitland, Pictured Cliffs	25	45.2358	-79.8468	45.3134	-81.7042	44.3636	-84.1052	36.6818	-107.206	76.05	0.85	75	coastal plain	4	4. coastal plain	NULL
	Magnoliopsida	13	Magnoliales?	39	uncertain	105	Tricolpites spp.	358	1079	Angiosperm	1	Camp	1	Tschudy, 1973a	28	0.815494	Fruitland, Pictured Cliffs	25	45.2358	-79.8468	45.3134	-81.7042	44.3636	-84.1052	36.6818	-107.206	76.05	0.85	75	coastal plain	4	4. coastal plain	NULL
	Magnoliopsida	13	Magnoliales?	39	uncertain	105	Tricolpites vulgaris	358	1080	Angiosperm	1	Camp	1	Tschudy, 1973a	28	0.203874	Fruitland, Pictured Cliffs	25	45.2358	-79.8468	45.3134	-81.7042	44.3636	-84.1052	36.6818	-107.206	76.05	0.85	75	coastal plain	4	4. coastal plain	NULL
	Magnoliopsida	13	Magnoliales?	39	uncertain	105	Tricolporites rhomboides	361	1100	Angiosperm	1	Camp	1	Tschudy, 1973a	28	0.254842	Fruitland, Pictured Cliffs	25	45.2358	-79.8468	45.3134	-81.7042	44.3636	-84.1052	36.6818	-107.206	76.05	0.85	75	temperate lowland forest	2	2. temperate lowland forest	NULL
	uncertain	23	uncertain	80	uncertain	105	Triletes sp.	364	1116	Fern/Moss	2	Camp	1	Tschudy, 1973a	28	8.46075	Fruitland, Pictured Cliffs	25	45.2358	-79.8468	45.3134	-81.7042	44.3636	-84.1052	36.6818	-107.206	76.05	0.85	75	temperate lowland forest	2	2. temperate lowland forest	NULL
	Polypodiopsida	18	uncertain	80	uncertain	105	Triplanosporites sp.	368	1122	Fern/Moss	2	Camp	1	Tschudy, 1973a	28	0.101937	Fruitland, Pictured Cliffs	25	45.2358	-79.8468	45.3134	-81.7042	44.3636	-84.1052	36.6818	-107.206	76.05	0.85	75	tropical lowland forest	6	6. tropical lowland forest	NULL
	Magnoliopsida	13	Proteales	61	Proteaceae	84	Triporopollenites rugatus	370	1137	Angiosperm	1	Camp	1	Tschudy, 1973a	28	3.56779	Fruitland, Pictured Cliffs	25	45.2358	-79.8468	45.3134	-81.7042	44.3636	-84.1052	36.6818	-107.206	76.05	0.85	75	coastal plain	4	4. coastal plain	NULL
	Magnoliopsida	13	Fagales	28	Juglandaceae	55	Trudopollis meekeri	375	1148	Angiosperm	1	Camp	1	Tschudy, 1973a	28	0.254842	Fruitland, Pictured Cliffs	25	45.2358	-79.8468	45.3134	-81.7042	44.3636	-84.1052	36.6818	-107.206	76.05	0.85	75	temperate lowland forest	2	2. temperate lowland forest	NULL
	Magnoliopsida	13	Fagales	28	Juglandaceae	55	Trudopollis sp.	375	1149	Angiosperm	1	Camp	1	Tschudy, 1973a	28	0.203874	Fruitland, Pictured Cliffs	25	45.2358	-79.8468	45.3134	-81.7042	44.3636	-84.1052	36.6818	-107.206	76.05	0.85	75	temperate lowland forest	2	2. temperate lowland forest	NULL
	Magnoliopsida	13	Rosales	63	Ulmaceae	102	Ulmipollenites spp.	380	1163	Angiosperm	1	Camp	1	Tschudy, 1973a	28	0.101937	Fruitland, Pictured Cliffs	25	45.2358	-79.8468	45.3134	-81.7042	44.3636	-84.1052	36.6818	-107.206	76.05	0.85	75	temperate lowland forest	2	2. temperate lowland forest	NULL
	Magnoliopsida	13	Vitales	77	Vitaceae	103	Vitis affluens	392	1184	Angiosperm	1	Camp	1	Tschudy, 1973a	28	0.662589	Fruitland, Pictured Cliffs	25	45.2358	-79.8468	45.3134	-81.7042	44.3636	-84.1052	36.6818	-107.206	76.05	0.85	75	swampy, lagoonal	3	3. swampy, lagoonal	NULL
	Marchantiopsida	15	uncertain	80	uncertain	105	Zlivisporis sp.	397	1203	Fern/Moss	2	Camp	1	Tschudy, 1973a	28	0.356779	Fruitland, Pictured Cliffs	25	45.2358	-79.8468	45.3134	-81.7042	44.3636	-84.1052	36.6818	-107.206	76.05	0.85	75	swampy, lagoonal	3	3. swampy, lagoonal	NULL
	Pinopsida	16	uncertain	80	uncertain	105	Zonalapollenites sp.	399	1207	Gymnosperm	3	Camp	1	Tschudy, 1973a	28	0.30581	Fruitland, Pictured Cliffs	25	45.2358	-79.8468	45.3134	-81.7042	44.3636	-84.1052	36.6818	-107.206	76.05	0.85	75	temperate lowland forest	2	2. temperate lowland forest	NULL
	Magnoliopsida	13	Sapindales?	68	uncertain	105	Aesculiidites dubius	10	25	Angiosperm	1	Camp	1	Tschudy, 1973b	29	0.930233	Judith River	28	55.9322	-75.232	56.056	-77.435	55.1537	-80.319	47.6395	-108.688	77.45	2.25	75	coastal plain	4	4. coastal plain	D4067; Nonmarine
	Magnoliopsida	13	Santalales?	66	Santalaceae?	90	Aquilapollenites attenuatus	22	69	Angiosperm	1	Camp	1	Tschudy, 1973b	29	0.465116	Judith River	28	55.9322	-75.232	56.056	-77.435	55.1537	-80.319	47.6395	-108.688	77.45	2.25	75	temperate lowland forest	2	2. temperate lowland forest	D4067; Nonmarine
	Magnoliopsida	13	Santalales?	66	Santalaceae?	90	Aquilapollenites quadrilobus	22	124	Angiosperm	1	Camp	1	Tschudy, 1973b	29	6.51163	Judith River	28	55.9322	-75.232	56.056	-77.435	55.1537	-80.319	47.6395	-108.688	77.45	2.25	75	temperate lowland forest	2	2. temperate lowland forest	D4067; Nonmarine
	Magnoliopsida	13	Santalales?	66	Santalaceae?	90	Aquilapollenites sp.	22	131	Angiosperm	1	Camp	1	Tschudy, 1973b	29	0.465116	Judith River	28	55.9322	-75.232	56.056	-77.435	55.1537	-80.319	47.6395	-108.688	77.45	2.25	75	temperate lowland forest	2	2. temperate lowland forest	D4067; Nonmarine
	Magnoliopsida	13	Santalales?	66	Santalaceae?	90	Aquilapollenites spp.	22	135	Angiosperm	1	Camp	1	Tschudy, 1973b	29	0.465116	Judith River	28	55.9322	-75.232	56.056	-77.435	55.1537	-80.319	47.6395	-108.688	77.45	2.25	75	temperate lowland forest	2	2. temperate lowland forest	D4067; Nonmarine
	Magnoliopsida	13	Santalales?	66	Santalaceae?	90	Aquilapollenites trialatus	22	139	Angiosperm	1	Camp	1	Tschudy, 1973b	29	0.465116	Judith River	28	55.9322	-75.232	56.056	-77.435	55.1537	-80.319	47.6395	-108.688	77.45	2.25	75	temperate lowland forest	2	2. temperate lowland forest	D4067; Nonmarine
	Liliopsida	10	Arecales	6	uncertain	105	Arecipites spp.	25	156	Angiosperm	1	Camp	1	Tschudy, 1973b	29	1.86047	Judith River	28	55.9322	-75.232	56.056	-77.435	55.1537	-80.319	47.6395	-108.688	77.45	2.25	75	swampy, lagoonal	3	3. swampy, lagoonal	D4067; Nonmarine
	Pinopsida?	17	uncertain	80	uncertain	105	Bisaccates spp.	39	209	Gymnosperm	3	Camp	1	Tschudy, 1973b	29	0.465116	Judith River	28	55.9322	-75.232	56.056	-77.435	55.1537	-80.319	47.6395	-108.688	77.45	2.25	75	coastal plain	4	4. coastal plain	D4067; Nonmarine
	Lycopodiopsida	12	Lycopodiales	36	uncertain	105	Camarozonosporites spp.	44	227	Fern/Moss	2	Camp	1	Tschudy, 1973b	29	0.465116	Judith River	28	55.9322	-75.232	56.056	-77.435	55.1537	-80.319	47.6395	-108.688	77.45	2.25	75	coastal plain	4	4. coastal plain	D4067; Nonmarine
	Polypodiopsida	18	Schizaeales	71	Schizaeaceae	93	Cicatricosisporites radiatus	58	272	Fern/Moss	2	Camp	1	Tschudy, 1973b	29	0.465116	Judith River	28	55.9322	-75.232	56.056	-77.435	55.1537	-80.319	47.6395	-108.688	77.45	2.25	75	temperate lowland forest	2	2. temperate lowland forest	D4067; Nonmarine
	Magnoliopsida	13	Santalales?	66	Loranthaceae?	60	Cranwellia bacata	78	323	Angiosperm	1	Camp	1	Tschudy, 1973b	29	0.465116	Judith River	28	55.9322	-75.232	56.056	-77.435	55.1537	-80.319	47.6395	-108.688	77.45	2.25	75	temperate lowland forest	2	2. temperate lowland forest	D4067; Nonmarine
	Polypodiopsida?	19	Cyatheales?	17	Cyatheaceae?	32	Cyathidites minor	82	349	Fern/Moss	2	Camp	1	Tschudy, 1973b	29	0.930233	Judith River	28	55.9322	-75.232	56.056	-77.435	55.1537	-80.319	47.6395	-108.688	77.45	2.25	75	temperate lowland forest	2	2. temperate lowland forest	D4067; Nonmarine
	Polypodiopsida	18	uncertain	80	uncertain	105	Deltoidospora sp.	86	368	Fern/Moss	2	Camp	1	Tschudy, 1973b	29	0.465116	Judith River	28	55.9322	-75.232	56.056	-77.435	55.1537	-80.319	47.6395	-108.688	77.45	2.25	75	temperate lowland forest	2	2. temperate lowland forest	D4067; Nonmarine
	Magnoliopsida	13	Fagales?	29	Juglandaceae?	56	Dyadonapites reticulatus	94	382	Angiosperm	1	Camp	1	Tschudy, 1973b	29	3.25581	Judith River	28	55.9322	-75.232	56.056	-77.435	55.1537	-80.319	47.6395	-108.688	77.45	2.25	75	coastal plain	4	4. coastal plain	D4067; Nonmarine
	Polypodiopsida	18	Equisetales	22	Equisetaceae	39	Equisetosporites spp.	106	417	Fern/Moss	2	Camp	1	Tschudy, 1973b	29	0.465116	Judith River	28	55.9322	-75.232	56.056	-77.435	55.1537	-80.319	47.6395	-108.688	77.45	2.25	75	open scrubland	8	8. open scrubland	D4067; Nonmarine
	Magnoliopsida	13	Buxales	8	Buxaceae	20	Erdtmanipollis pachysandroides	107	422	Angiosperm	1	Camp	1	Tschudy, 1973b	29	0.465116	Judith River	28	55.9322	-75.232	56.056	-77.435	55.1537	-80.319	47.6395	-108.688	77.45	2.25	75	temperate lowland forest	2	2. temperate lowland forest	D4067; Nonmarine
	Bryopsida?	4	uncertain	80	uncertain	105	Foraminisporis wonthaggiensis	116	445	Fern/Moss	2	Camp	1	Tschudy, 1973b	29	0.465116	Judith River	28	55.9322	-75.232	56.056	-77.435	55.1537	-80.319	47.6395	-108.688	77.45	2.25	75	coastal plain	4	4. coastal plain	D4067; Nonmarine
	Polypodiopsida	18	uncertain	80	uncertain	105	Ghoshispora sp.	126	474	Fern/Moss	2	Camp	1	Tschudy, 1973b	29	0.465116	Judith River	28	55.9322	-75.232	56.056	-77.435	55.1537	-80.319	47.6395	-108.688	77.45	2.25	75	swampy, lagoonal	3	3. swampy, lagoonal	D4067; Nonmarine
	Polypodiopsida	18	Gleicheniales	30	Gleicheniaceae	49	Gleicheniidites spp.	128	484	Fern/Moss	2	Camp	1	Tschudy, 1973b	29	5.11628	Judith River	28	55.9322	-75.232	56.056	-77.435	55.1537	-80.319	47.6395	-108.688	77.45	2.25	75	swampy, lagoonal	3	3. swampy, lagoonal	D4067; Nonmarine
	Pinopsida	16	Pinales?	55	uncertain	105	Inaperturates spp.	146	517	Gymnosperm	3	Camp	1	Tschudy, 1973b	29	0.465116	Judith River	28	55.9322	-75.232	56.056	-77.435	55.1537	-80.319	47.6395	-108.688	77.45	2.25	75	temperate lowland forest	2	2. temperate lowland forest	D4067; Nonmarine
	Polypodiopsida	18	Cyatheales	16	Cyatheaceae	31	Kuylisporites spp.	157	557	Fern/Moss	2	Camp	1	Tschudy, 1973b	29	0.465116	Judith River	28	55.9322	-75.232	56.056	-77.435	55.1537	-80.319	47.6395	-108.688	77.45	2.25	75	tropical lowland forest	6	6. tropical lowland forest	D4067; Nonmarine
	Polypodiopsida	18	uncertain	80	uncertain	105	Laevigatosporites spp.	158	570	Fern/Moss	2	Camp	1	Tschudy, 1973b	29	8.83721	Judith River	28	55.9322	-75.232	56.056	-77.435	55.1537	-80.319	47.6395	-108.688	77.45	2.25	75	coastal plain	4	4. coastal plain	D4067; Nonmarine
	Lycopodiopsida	12	uncertain	80	uncertain	105	Leptolepidites major	162	579	Fern/Moss	2	Camp	1	Tschudy, 1973b	29	0.465116	Judith River	28	55.9322	-75.232	56.056	-77.435	55.1537	-80.319	47.6395	-108.688	77.45	2.25	75	coastal plain	4	4. coastal plain	D4067; Nonmarine
	Liliopsida	10	Liliales	34	uncertain	105	Liliacidites complexus	168	591	Angiosperm	1	Camp	1	Tschudy, 1973b	29	4.18605	Judith River	28	55.9322	-75.232	56.056	-77.435	55.1537	-80.319	47.6395	-108.688	77.45	2.25	75	temperate lowland forest	2	2. temperate lowland forest	D4067; Nonmarine
	uncertain	23	uncertain	80	uncertain	105	Mancicorpus calvus	180	633	Angiosperm	1	Camp	1	Tschudy, 1973b	29	0.930233	Judith River	28	55.9322	-75.232	56.056	-77.435	55.1537	-80.319	47.6395	-108.688	77.45	2.25	75	coastal plain	4	4. coastal plain	D4067; Nonmarine
	Polypodiopsida	18	Schizaeales	71	Schizaeaceae	93	Microfoveolatosporis canaliculatus	186	659	Fern/Moss	2	Camp	1	Tschudy, 1973b	29	0.930233	Judith River	28	55.9322	-75.232	56.056	-77.435	55.1537	-80.319	47.6395	-108.688	77.45	2.25	75	temperate lowland forest	2	2. temperate lowland forest	D4067; Nonmarine
	Magnoliopsida	13	Fagales?	29	Juglandaceae?	56	Montanapollis endannulatus	195	690	Angiosperm	1	Camp	1	Tschudy, 1973b	29	0.465116	Judith River	28	55.9322	-75.232	56.056	-77.435	55.1537	-80.319	47.6395	-108.688	77.45	2.25	75	unknown	0	0. unknown	D4067; Nonmarine
	Magnoliopsida	13	Proteales	61	uncertain	105	Proteacidites spp.	262	833	Angiosperm	1	Camp	1	Tschudy, 1973b	29	0.465116	Judith River	28	55.9322	-75.232	56.056	-77.435	55.1537	-80.319	47.6395	-108.688	77.45	2.25	75	unknown	0	0. unknown	D4067; Nonmarine
	uncertain	23	uncertain	80	uncertain	105	Pulcheripollenites krempii	272	851	Angiosperm	1	Camp	1	Tschudy, 1973b	29	0.465116	Judith River	28	55.9322	-75.232	56.056	-77.435	55.1537	-80.319	47.6395	-108.688	77.45	2.25	75	swampy, lagoonal	3	3. swampy, lagoonal	D4067; Nonmarine
	Pinopsida	16	uncertain	80	uncertain	105	Rugubivesiculites sp.	297	915	Gymnosperm	3	Camp	1	Tschudy, 1973b	29	0.465116	Judith River	28	55.9322	-75.232	56.056	-77.435	55.1537	-80.319	47.6395	-108.688	77.45	2.25	75	coastal plain	4	4. coastal plain	D4067; Nonmarine
	Bryopsida	3	uncertain	80	uncertain	105	Stereisporites spp.	329	993	Fern/Moss	2	Camp	1	Tschudy, 1973b	29	0.465116	Judith River	28	55.9322	-75.232	56.056	-77.435	55.1537	-80.319	47.6395	-108.688	77.45	2.25	75	coastal plain	4	4. coastal plain	D4067; Nonmarine
	Magnoliopsida	13	Fagales	28	Juglandaceae	55	Subtriporopollenites alpinus	336	1004	Angiosperm	1	Camp	1	Tschudy, 1973b	29	2.32558	Judith River	28	55.9322	-75.232	56.056	-77.435	55.1537	-80.319	47.6395	-108.688	77.45	2.25	75	temperate lowland forest	2	2. temperate lowland forest	D4067; Nonmarine
	Pinopsida	16	Pinales	54	Cupressaceae?	30	Taxodiaceaepollenites hiatus	343	1015	Gymnosperm	3	Camp	1	Tschudy, 1973b	29	17.2093	Judith River	28	55.9322	-75.232	56.056	-77.435	55.1537	-80.319	47.6395	-108.688	77.45	2.25	75	temperate lowland forest	2	2. temperate lowland forest	D4067; Nonmarine
	Magnoliopsida	13	Magnoliales?	39	uncertain	105	Tricolpites hians	358	1060	Angiosperm	1	Camp	1	Tschudy, 1973b	29	2.32558	Judith River	28	55.9322	-75.232	56.056	-77.435	55.1537	-80.319	47.6395	-108.688	77.45	2.25	75	coastal plain	4	4. coastal plain	D4067; Nonmarine
	Magnoliopsida	13	Magnoliales?	39	uncertain	105	Tricolpites reticulatus	358	1076	Angiosperm	1	Camp	1	Tschudy, 1973b	29	0.465116	Judith River	28	55.9322	-75.232	56.056	-77.435	55.1537	-80.319	47.6395	-108.688	77.45	2.25	75	coastal plain	4	4. coastal plain	D4067; Nonmarine
	Magnoliopsida	13	Magnoliales?	39	uncertain	105	Tricolpites spp.	358	1079	Angiosperm	1	Camp	1	Tschudy, 1973b	29	0.465116	Judith River	28	55.9322	-75.232	56.056	-77.435	55.1537	-80.319	47.6395	-108.688	77.45	2.25	75	coastal plain	4	4. coastal plain	D4067; Nonmarine
	uncertain	23	uncertain	80	uncertain	105	Tricolpopollenites levitas	359	1086	Angiosperm	1	Camp	1	Tschudy, 1973b	29	0.930233	Judith River	28	55.9322	-75.232	56.056	-77.435	55.1537	-80.319	47.6395	-108.688	77.45	2.25	75	coastal plain	4	4. coastal plain	D4067; Nonmarine
	uncertain	23	uncertain	80	uncertain	105	Tricolpopollenites tesselatus	359	1094	Angiosperm	1	Camp	1	Tschudy, 1973b	29	10.2326	Judith River	28	55.9322	-75.232	56.056	-77.435	55.1537	-80.319	47.6395	-108.688	77.45	2.25	75	coastal plain	4	4. coastal plain	D4067; Nonmarine
	Magnoliopsida	13	Magnoliales?	39	uncertain	105	Tricolporites rhomboides	361	1100	Angiosperm	1	Camp	1	Tschudy, 1973b	29	0.930233	Judith River	28	55.9322	-75.232	56.056	-77.435	55.1537	-80.319	47.6395	-108.688	77.45	2.25	75	temperate lowland forest	2	2. temperate lowland forest	D4067; Nonmarine
	uncertain	23	uncertain	80	uncertain	105	Triletes sp.	364	1116	Fern/Moss	2	Camp	1	Tschudy, 1973b	29	4.18605	Judith River	28	55.9322	-75.232	56.056	-77.435	55.1537	-80.319	47.6395	-108.688	77.45	2.25	75	temperate lowland forest	2	2. temperate lowland forest	D4067; Nonmarine
	Polypodiopsida?	19	uncertain	80	uncertain	105	Umbosporites callosus	382	1167	Fern/Moss	2	Camp	1	Tschudy, 1973b	29	0.465116	Judith River	28	55.9322	-75.232	56.056	-77.435	55.1537	-80.319	47.6395	-108.688	77.45	2.25	75	coastal plain	4	4. coastal plain	D4067; Nonmarine
	Magnoliopsida	13	Santalales?	66	Santalaceae?	90	Aquilapollenites attenuatus	22	69	Angiosperm	1	Camp	1	Tschudy, 1973b	29	0.483092	Judith River	28	56.0873	-75.383	56.21	-77.5905	55.3062	-80.4754	47.7588	-108.882	77.45	2.25	75	temperate lowland forest	2	2. temperate lowland forest	D4069; Nonmarine
	Magnoliopsida	13	Santalales?	66	Santalaceae?	90	Aquilapollenites clarireticulatus	22	83	Angiosperm	1	Camp	1	Tschudy, 1973b	29	0.483092	Judith River	28	56.0873	-75.383	56.21	-77.5905	55.3062	-80.4754	47.7588	-108.882	77.45	2.25	75	temperate lowland forest	2	2. temperate lowland forest	D4069; Nonmarine
	Magnoliopsida	13	Santalales?	66	Santalaceae?	90	Aquilapollenites reticulatus	22	127	Angiosperm	1	Camp	1	Tschudy, 1973b	29	0.483092	Judith River	28	56.0873	-75.383	56.21	-77.5905	55.3062	-80.4754	47.7588	-108.882	77.45	2.25	75	temperate lowland forest	2	2. temperate lowland forest	D4069; Nonmarine
	Magnoliopsida	13	Santalales?	66	Santalaceae?	90	Aquilapollenites turbidus	22	141	Angiosperm	1	Camp	1	Tschudy, 1973b	29	0.483092	Judith River	28	56.0873	-75.383	56.21	-77.5905	55.3062	-80.4754	47.7588	-108.882	77.45	2.25	75	temperate lowland forest	2	2. temperate lowland forest	D4069; Nonmarine
	Liliopsida	10	Arecales	6	uncertain	105	Arecipites spp.	25	156	Angiosperm	1	Camp	1	Tschudy, 1973b	29	1.93237	Judith River	28	56.0873	-75.383	56.21	-77.5905	55.3062	-80.4754	47.7588	-108.882	77.45	2.25	75	swampy, lagoonal	3	3. swampy, lagoonal	D4069; Nonmarine
	Magnoliopsida	13	Santalales?	66	Loranthaceae?	60	Cranwellia bacata	78	323	Angiosperm	1	Camp	1	Tschudy, 1973b	29	0.483092	Judith River	28	56.0873	-75.383	56.21	-77.5905	55.3062	-80.4754	47.7588	-108.882	77.45	2.25	75	temperate lowland forest	2	2. temperate lowland forest	D4069; Nonmarine
	Polypodiopsida?	19	Cyatheales?	17	Cyatheaceae?	32	Cyathidites minor	82	349	Fern/Moss	2	Camp	1	Tschudy, 1973b	29	0.966184	Judith River	28	56.0873	-75.383	56.21	-77.5905	55.3062	-80.4754	47.7588	-108.882	77.45	2.25	75	temperate lowland forest	2	2. temperate lowland forest	D4069; Nonmarine
	Polypodiopsida	18	uncertain	80	uncertain	105	Deltoidospora sp.	86	368	Fern/Moss	2	Camp	1	Tschudy, 1973b	29	0.483092	Judith River	28	56.0873	-75.383	56.21	-77.5905	55.3062	-80.4754	47.7588	-108.882	77.45	2.25	75	temperate lowland forest	2	2. temperate lowland forest	D4069; Nonmarine
	Magnoliopsida	13	Fagales?	29	Juglandaceae?	56	Dyadonapites reticulatus	94	382	Angiosperm	1	Camp	1	Tschudy, 1973b	29	0.483092	Judith River	28	56.0873	-75.383	56.21	-77.5905	55.3062	-80.4754	47.7588	-108.882	77.45	2.25	75	coastal plain	4	4. coastal plain	D4069; Nonmarine
	Polypodiopsida	18	Gleicheniales	30	Gleicheniaceae	49	Gleicheniidites spp.	128	484	Fern/Moss	2	Camp	1	Tschudy, 1973b	29	1.93237	Judith River	28	56.0873	-75.383	56.21	-77.5905	55.3062	-80.4754	47.7588	-108.882	77.45	2.25	75	swampy, lagoonal	3	3. swampy, lagoonal	D4069; Nonmarine
	Polypodiopsida?	19	uncertain	80	uncertain	105	Laevigatosporites spp.	158	570	Fern/Moss	2	Camp	1	Tschudy, 1973b	29	15.942	Judith River	28	56.0873	-75.383	56.21	-77.5905	55.3062	-80.4754	47.7588	-108.882	77.45	2.25	75	coastal plain	4	4. coastal plain	D4069; Nonmarine
	Liliopsida	10	Liliales	34	uncertain	105	Liliacidites complexus	168	591	Angiosperm	1	Camp	1	Tschudy, 1973b	29	0.483092	Judith River	28	56.0873	-75.383	56.21	-77.5905	55.3062	-80.4754	47.7588	-108.882	77.45	2.25	75	temperate lowland forest	2	2. temperate lowland forest	D4069; Nonmarine
	uncertain	23	uncertain	80	uncertain	105	Mancicorpus calvus	180	633	Angiosperm	1	Camp	1	Tschudy, 1973b	29	2.41546	Judith River	28	56.0873	-75.383	56.21	-77.5905	55.3062	-80.4754	47.7588	-108.882	77.45	2.25	75	coastal plain	4	4. coastal plain	D4069; Nonmarine
	uncertain	23	uncertain	80	uncertain	105	Mancicorpus tripodiformis	180	642	Angiosperm	1	Camp	1	Tschudy, 1973b	29	0.483092	Judith River	28	56.0873	-75.383	56.21	-77.5905	55.3062	-80.4754	47.7588	-108.882	77.45	2.25	75	coastal plain	4	4. coastal plain	D4069; Nonmarine
	Polypodiopsida	18	Osmundales	51	Osmundaceae	74	Osmundacidites sp.	215	720	Fern/Moss	2	Camp	1	Tschudy, 1973b	29	0.483092	Judith River	28	56.0873	-75.383	56.21	-77.5905	55.3062	-80.4754	47.7588	-108.882	77.45	2.25	75	temperate lowland forest	2	2. temperate lowland forest	D4069; Nonmarine
	Ginkgoopsida?	7	uncertain	80	uncertain	105	Pityosporites elongatus grandis	243	771	Gymnosperm	3	Camp	1	Tschudy, 1973b	29	0.483092	Judith River	28	56.0873	-75.383	56.21	-77.5905	55.3062	-80.4754	47.7588	-108.882	77.45	2.25	75	coastal plain	4	4. coastal plain	D4069; Nonmarine
	Magnoliopsida	13	Proteales	61	uncertain	105	Proteacidites spp.	262	833	Angiosperm	1	Camp	1	Tschudy, 1973b	29	0.483092	Judith River	28	56.0873	-75.383	56.21	-77.5905	55.3062	-80.4754	47.7588	-108.882	77.45	2.25	75	unknown	0	0. unknown	D4069; Nonmarine
	uncertain	23	uncertain	80	uncertain	105	Pulcheripollenites krempii	272	851	Angiosperm	1	Camp	1	Tschudy, 1973b	29	0.483092	Judith River	28	56.0873	-75.383	56.21	-77.5905	55.3062	-80.4754	47.7588	-108.882	77.45	2.25	75	swampy, lagoonal	3	3. swampy, lagoonal	D4069; Nonmarine
	Magnoliopsida	13	Fabales?	27	Fabaceae?	46	Sindorapollis granulatus	317	957	Angiosperm	1	Camp	1	Tschudy, 1973b	29	4.83092	Judith River	28	56.0873	-75.383	56.21	-77.5905	55.3062	-80.4754	47.7588	-108.882	77.45	2.25	75	coastal plain	4	4. coastal plain	D4069; Nonmarine
	Pinopsida	16	Pinales	54	Cupressaceae?	30	Taxodiaceaepollenites hiatus	343	1015	Gymnosperm	3	Camp	1	Tschudy, 1973b	29	33.8164	Judith River	28	56.0873	-75.383	56.21	-77.5905	55.3062	-80.4754	47.7588	-108.882	77.45	2.25	75	temperate lowland forest	2	2. temperate lowland forest	D4069; Nonmarine
	Magnoliopsida	13	Magnoliales?	39	uncertain	105	Tricolpites hians	358	1060	Angiosperm	1	Camp	1	Tschudy, 1973b	29	0.966184	Judith River	28	56.0873	-75.383	56.21	-77.5905	55.3062	-80.4754	47.7588	-108.882	77.45	2.25	75	coastal plain	4	4. coastal plain	D4069; Nonmarine
	Magnoliopsida	13	Magnoliales?	39	uncertain	105	Tricolpites spp.	358	1079	Angiosperm	1	Camp	1	Tschudy, 1973b	29	0.483092	Judith River	28	56.0873	-75.383	56.21	-77.5905	55.3062	-80.4754	47.7588	-108.882	77.45	2.25	75	coastal plain	4	4. coastal plain	D4069; Nonmarine
	uncertain	23	uncertain	80	uncertain	105	Tricolpopollenites tesselatus	359	1094	Angiosperm	1	Camp	1	Tschudy, 1973b	29	2.89855	Judith River	28	56.0873	-75.383	56.21	-77.5905	55.3062	-80.4754	47.7588	-108.882	77.45	2.25	75	coastal plain	4	4. coastal plain	D4069; Nonmarine
[truncated: 1,622 more rows]

## Sheet: Pollen Class
Class	Class Code
'Anthocerotopsida'	1
'Anthocerotopsida?'	2
[truncated: 21 more rows]

## Sheet: Pollen Order
Order	Order Code
[truncated: 81 more rows]

[truncated: 7 more sheets: Pollen Family, Pollen Genera, Pollen Species, Biome Count, Order Changes, Family Changes, Biome Changes]
